# Supplementary material
Source: PubMed Central journal article supplement (PMC7004281)
Supplement: NIHMS1549128-supplement-315179_online.pdf [file NIHMS1549128-supplement-315179_online.pdf]

## Online Methods, Tables, and Figures

|                                                                                                                                                                                                                                                                                                                                                                                                                                                                                                                                                                                                                          |    |
|--------------------------------------------------------------------------------------------------------------------------------------------------------------------------------------------------------------------------------------------------------------------------------------------------------------------------------------------------------------------------------------------------------------------------------------------------------------------------------------------------------------------------------------------------------------------------------------------------------------------------|----|
| <b>Online Methods</b> .....                                                                                                                                                                                                                                                                                                                                                                                                                                                                                                                                                                                              | 3  |
| <b>Meta-analysis of three omics based on their <i>P</i> values</b> .....                                                                                                                                                                                                                                                                                                                                                                                                                                                                                                                                                 | 3  |
| <b>Network-wide Association Study (NetWAS)</b> .....                                                                                                                                                                                                                                                                                                                                                                                                                                                                                                                                                                     | 4  |
| <b>Description of gene expression sequencing data</b> .....                                                                                                                                                                                                                                                                                                                                                                                                                                                                                                                                                              | 4  |
| <b>Gene expression levels across multiple heart tissues</b> .....                                                                                                                                                                                                                                                                                                                                                                                                                                                                                                                                                        | 5  |
| <b>Tissue-specific expression analysis</b> .....                                                                                                                                                                                                                                                                                                                                                                                                                                                                                                                                                                         | 6  |
| <b>Heritability estimation from summary statistics (HESS)</b> .....                                                                                                                                                                                                                                                                                                                                                                                                                                                                                                                                                      | 6  |
| <b>Evaluation of type 1 error for multi-omic meta-analysis with or without NetWAS</b> .....                                                                                                                                                                                                                                                                                                                                                                                                                                                                                                                              | 7  |
| <b>Online Figure I.</b> C-statistics for multi-omics integration approach across different weights compositions of AFGen 2017 GWAS, methylation, and transcription. $w_g$ is the relative weight of genotype data. NetWAS <i>P</i> value is the cutoff for defining “pre-positive” genes. ....                                                                                                                                                                                                                                                                                                                           | 9  |
| <b>Online Figure II.</b> Relative type 1 error for multi-omics integration approach across different weights compositions of AFGen 2017 GWAS, methylation, and transcription in heart tissues. $w_g$ is the relative weight of genotype data. ....                                                                                                                                                                                                                                                                                                                                                                       | 10 |
| <b>Online Figure III.</b> C-statistics for multi-omics integration approach across different weights compositions of AFGen 2012 GWAS, methylation, and transcription in heart tissues. $w_g$ is the relative weight of genotype data. NetWAS <i>P</i> value is the cutoff for defining “pre-positive” genes.....                                                                                                                                                                                                                                                                                                         | 11 |
| <b>Online Figure IV.</b> C-statistics for multi-omics integration approach across different weights compositions of FHS AF GWAS, methylation, and transcription by in heart tissues. $w_g$ is the relative weight of genotype data. NetWAS <i>P</i> value is the cutoff for defining “pre-positive” genes.....                                                                                                                                                                                                                                                                                                           | 12 |
| <b>Online Figure V.</b> The expression of AF-related genes by multi-omics integration across different tissues in GTEx.....                                                                                                                                                                                                                                                                                                                                                                                                                                                                                              | 13 |
| <b>Online Figure VI.</b> Spearman’s correlations of gene expression levels (in ranking percentiles) for the AF-related genes by multi-omics integration across different tissues in GTEx.....                                                                                                                                                                                                                                                                                                                                                                                                                            | 14 |
| <b>Online Figure VII.</b> Spearman’s correlation of $-\log_{10}(P \text{ values})$ in association analysis of combing all CpGs versus CpGs in promoter region (annotated as “TSS1500”, “TS200” and “5’UTR”) of the gene...                                                                                                                                                                                                                                                                                                                                                                                               | 15 |
| <b>Online Figure VIII.</b> Analysis flowchart of gene expression levels across multiple heart tissues. ....                                                                                                                                                                                                                                                                                                                                                                                                                                                                                                              | 16 |
| <b>Online Figure IX.</b> Total heritability estimates by HESS across different number of eigenvectors of the LD matrices for AFGen 2018 Europeans. The x-axis is the number of eigenvectors ( $k$ ), while the y-axis is the total heritability, red dots are the variants with minor allele frequency (MAF) $>1\%$ while green dots are MAF $>5\%$ , and the number in the parenthesis are the total number of variants. Red dash line is the heritability estimates by LDSC regression as 0.0388 (SE=0.0041), and the green dash line is the heritability estimates by individual level data as 0.228 (SE=0.0454)..... | 17 |
| <b>Online Figure X.</b> Total heritability estimates by HESS across different number of eigenvectors of the LD matrices for UKBB European participants. The x-axis is the number of eigenvectors ( $k$ ), while the y-axis is the total heritability, red dots are the variants with minor allele frequency (MAF) $>1\%$ while green dots                                                                                                                                                                                                                                                                                |    |

are MAF>5%, and the number in the parenthesis are the total number of variants. Red dash line is the heritability estimates by LDSC regression as 0.1197 (SE=0.0344), and the green dash line is the heritability estimates by individual level data as 0.228 (SE=0.0454)..... 18

**Online Figure XI.** Screenshots of how to use the NetWAS online tool to run the analysis. .... 19

**Online Table I.** Correlations of genotype, methylation, and transcription calculated by their gene-based association *P* values with atrial fibrillation..... 20

**Online Table II.** Twenty-five tissue groups for tissue-specific enrichment analysis from GTEx..... 21

**Online Table III.** Comparisons of performances of multi-omics integration approach by to the single GWAS analysis from AFGen 2017. .... 23

**Online Table IV.** Number of AF-related genes by GWAS only versus by multi-omics when reached the optimal C-statistics..... 25

**Online Table V.** Comparisons of AF-associated genes by our multi-omics approach with other GWAS studies, GWAS catalog, Open Targets Platform, OMIM. .... 26

**Online Table VI.** AF pathogenesis genes and their functions. .... 111

**Online Table VII.** Heritability estimation by the UKBB Europeans GWAS summary statistics. .... 113

**Reference** ..... 114

## Online Methods

### Meta-analysis of three omics based on their $P$ values

The meta-analysis  $Z$ -scores ( $Z_{meta}$ ) and  $P$  values ( $P_{meta}$ ) for each gene were computed as

$$Z_{meta} = \frac{\sum w_i Z_i}{\sqrt{\sum w_i^2}} \text{ and } P_{meta} = \Phi(Z_{meta}), \text{ in which } Z_i = \Phi^{-1}(P_i) \text{ are the } z\text{-scores for each omics data,}$$

computed from the gene-based association  $P$  values. The weights  $w_i$  were assigned based on the

number of AF cases in each omics data set:  $w_i = N_{case_i}^{1/j}$ , in which  $i$  was the type of data ( $i$ =

GWAS, EWAS, or TWAS),  $N_{case_i}$  was the number of AF cases for each omics data, and  $j$  was set

equal across the three types of data. As the GWAS sample size dominates the other two data sets,

we used  $j$  to up-weight the EWAS and TWAS data compared to the GWAS data. As  $j$  increases,

the weights for each data set became more similar. We first considered integer values  $j=1, 2, 3, \dots,$

1000; we also considered values ranging from 2 to 10 by 0.2 increments, for more weights

compositions if needed. We also investigated two extreme scenarios: 1) 100% weight for GWAS

while no weights for EWAS and TWAS, and 2) equal weights for all three omics data.

Bonferroni correction was used to account for multiple testing, and genes with  $P_{meta} < 0.05/M$ , in

which  $M=14,364$  is the number of tested genes that were considered as significant AF-related

genes. The relative weight of GWAS was annotated as  $w_g$ :

$$w_g = \frac{\sqrt[j]{N_{case_{GWAS}}}}{(\sqrt[j]{N_{case_{GWAS}}} + \sqrt[j]{N_{case_{EWAS}}} + \sqrt[j]{N_{case_{TWAS}}})}$$

## **Network-wide Association Study (NetWAS)**

NetWAS<sup>1</sup> is a machine learning-based method that combines gene-level association results with tissue-specific interaction network. The network was built from over 14,000 publications and low-throughput tissue-specific expression data. The list of datasets used to build the network is shown in <https://hb.flatironinstitute.org/data>. A specific network is built for each tissue type (e.g., heart, blood, and brain), which may be used for downstream analyses. The tissue-specific networks were downloaded from <https://hb.flatironinstitute.org/download>.

NetWAS trained a support vector machine classifier using nominally significant (e.g.,  $P < 0.01$ ) genes as “pre-positive” examples and non-significant (e.g.,  $P \geq 0.01$ ) genes as “pre-negatives”. The classifier was constructed using a tissue network relevant to a disease (e.g., general heart tissue for AF), where the classifier or hyperplane could maximally distinguished pre-positive and pre-negative genes in the network. Genes were re-ranked using their distance from the hyperplane, which represented as the NetWAS score. If a “pre-positive” gene was predicted positive (i.e., NetWAS score  $> 0$ , or referred as “post-positive”), the gene was considered as a disease related genes. The implementation of NetWAS has been described in the previous publication.<sup>1</sup> Detailed steps of how to use the NetWAS online tool (<https://hb.flatironinstitute.org/netwas>) are shown in **Online Figure XI** with the summary statistics from meta-analysis for the tissue-specific analysis.

## **Description of gene expression sequencing data**

- The Genotype-Tissue Expression (GTEx) project

The gene expression data in GTEx project was from 53 types of normal, non-diseased tissues across nearly 1,000 donors. We downloaded the raw RNA sequencing (RNA-Seq) data (reads per kilobase of transcript, RPKM) by genes from the GTEx V6 analysis freeze (dbGaP Accession phs000424.v6.p1):

[https://storage.googleapis.com/gtex\\_analysis\\_v6/rna\\_seq\\_data/GTEX\\_Analysis\\_v6\\_RNA-seq\\_RNA-SeQCv1.1.8\\_gene\\_rpkm.gct.gz](https://storage.googleapis.com/gtex_analysis_v6/rna_seq_data/GTEX_Analysis_v6_RNA-seq_RNA-SeQCv1.1.8_gene_rpkm.gct.gz).

- Gene expression in left atrium

There were 101 non-structural heart disease samples obtained from Myocardial Applied Genomics Network (MAGNet) repository. RNA-Seq was performed on the Illumina HiSeq 4000 platform at Broad Institute Genomic Services by standard procedures. Gene expression levels were also defined as RPKM values.

### **Gene expression levels across multiple heart tissues**

As genes could have varied expression levels across different samples, we converted the raw expression levels (RPKM values) into percentiles. An illustration is shown in **Online Figure VIII**. Assuming a specific tissue has  $m$  samples, each with  $n$  genes, the expression level of gene  $i$  across all genes in sample  $j$  is represented as a percentile  $R_{i,j}$ . The representative gene expression level for gene  $i$  is defined as the median ranking of gene  $i$  across all  $m$  samples for the tissue.

Independent AF-related genes were defined as those AF-related genes with Spearman's  $r^2 < 0.25$ . Similarly, independent non-AF-related genes were defined as those non-AF-related genes with pairwise Spearman's  $r^2 < 0.25$ . There were 1,057 (left atria, LA) and 773 (right atrial appendage, RA) independent genes in AF-related gene set, while 5,030 (LA) and 3,901 (RA) in non-AF-

related gene set. Two-sample Kolmogorov-Smirnov test was then used to compare two independent gene sets.

### **Tissue-specific expression analysis**

The tissue-specific expression analysis (TSEA)<sup>2</sup> was calculated by two steps: the first is an algorithm to define sets of genes with enriched or specific expression in each tissue, and the second is to identify and display significant overlaps between tissue-enriched gene sets and lists of candidate genes. Mathematically, for any gene  $i$  in a tissue  $t$ , tissue enrichment is defined as

$$SI_{i,t} = \frac{\sum_{k \neq t}^m \left( \text{rank} \left( \frac{RPKM_{i,t}}{RPKM_{i,k}} \right) \right)}{m-1},$$
 where  $m$  represents the number of tissues, RPKM represents the

expression level. In order to account for different number of expressed genes in different tissues,

$pSI$  is calculated as  $pSI_{i,t} = \text{Probability}(SI_{i,t} | \text{Data of tissue } t)$ , which represents the probability of the rankings of one transcript expression level in a specific tissue ( $t$ ) comparing to other tissues. For each tissue, genes with  $pSI < 0.05$  are considered as significantly enriched in the tissue. Then we can calculate the significance of the overlap between the candidate genes and the genes enriched in each tissue using the Fisher's Exact test.

### **Heritability estimation from summary statistics (HESS)**

Before the heritability estimation, HESS<sup>3</sup> (<http://bogdan.bioinformatics.ucla.edu/software/hess/>) needed to set up the parameters to get a more accurate estimates: 1) Adjust the heritability by the genomic control factor, because the GWAS summary statistics in our analysis were all accounting for population stratification to some degree, we should adjust the heritability estimates by the genomic control factors estimated by HESS (the genomic control factor in

AFGen 2018 Europeans<sup>4</sup> was 1.194, and in UKBB Europeans<sup>5</sup> was 1.246). 2) The number of eigenvectors of the truncated-SVD regularization of LD matrices which should be chosen based on the GWAS sample size, the default number of eigenvectors in HESS was 50 which was based on the simulations of 50,000 individuals, but the total sample size in AFGen 2018 or UKBB Europeans were much larger (both above 300,000 individuals). Because a GWAS with large sample size should use a large number of eigenvectors, we increased the number of eigenvectors until we could get a stable heritability estimation (**Online Figure IX** and **Online Figure X**). In our situation, we chose 200 as the number of eigenvectors.

### **Evaluation of type 1 error for multi-omic meta-analysis with or without NetWAS**

We estimated the type 1 error without NetWAS. Because we could simulate the gene-level summary statistics for the meta-analysis (without NetWAS) appropriately, but it was difficult for us to simulate the gene-gene interaction networks which were behind the summary statistics for NetWAS.

We simulated the z-scores for three types of omics of 15,000 genes, following a multivariate normal distribution with each mean of zero, and the covariance matrix as estimated from AFGen 2017 GWAS, EWAS, and TWAS (see partial table from **Online Table I**). The correlations between GWAS-EWAS, GWAS-TWAS, and EWAS-TWAS were 0.06, 0.005, and 0.022 respectively. One thousand replicates were simulated. Then, we used meta-analysis to combine those z-scores by different weights irrespective of the association directions. We calculated the relative type 1 error assuming the significance level ( $\alpha$ ) of 0.05, and  $3.3e-06$  ( $0.05/15,000$ ). Relative type 1 error equaled the total number of genes with  $P$  value less than  $\alpha$  across 1,000

replicates, divided by the expected number of false positives ( $\alpha \times 15,000 \times 1,000$ ). The results for relative type 1 error was in **Online Figure II**.



**Online Figure I.** C-statistics for multi-omics integration approach across different weights compositions of AFGen 2017 GWAS, methylation, and transcription.  $w_g$  is the relative weight of genotype data. NetWAS  $P$  value is the cutoff for defining “pre-positive” genes.

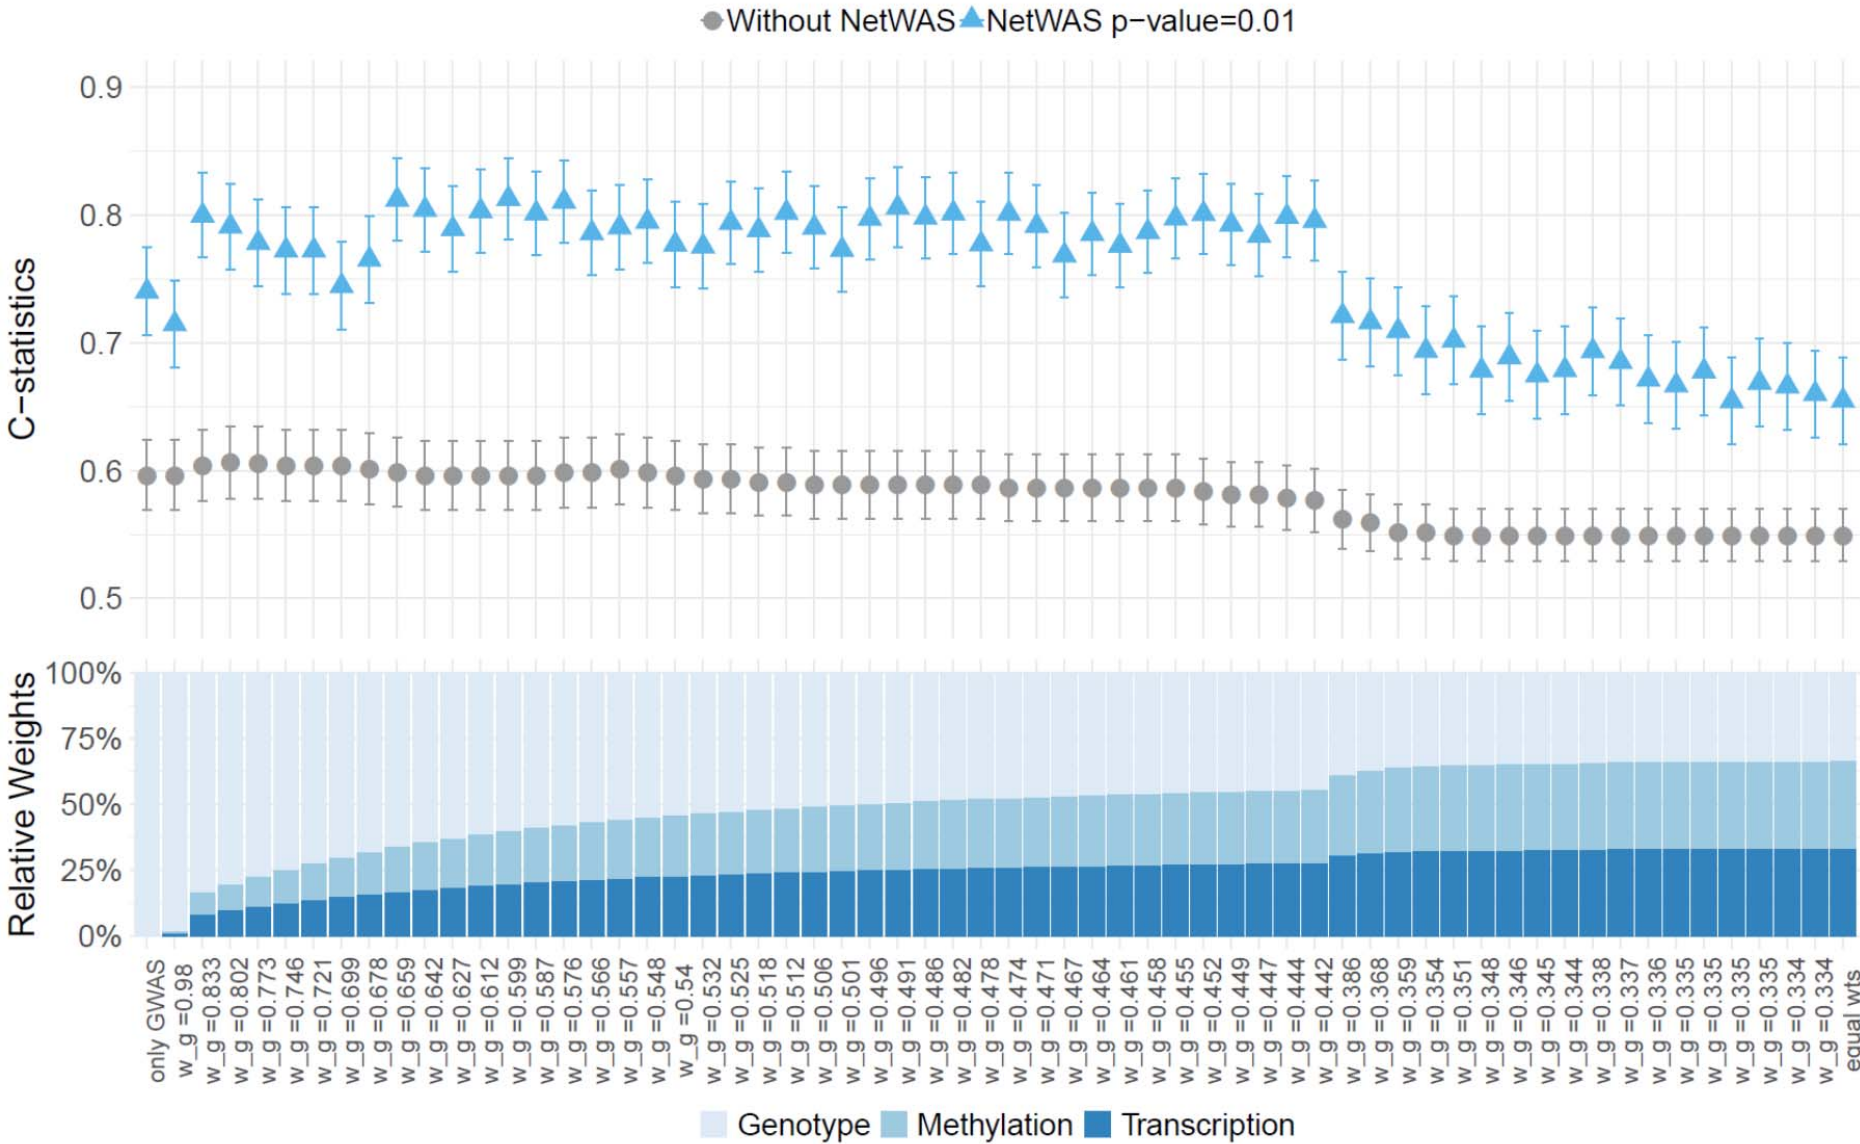

**Online Figure II.** Relative type 1 error for multi-omics integration approach across different weights compositions of AFGen 2017 GWAS, methylation, and transcription in heart tissues.  $w_g$  is the relative weight of genotype data.

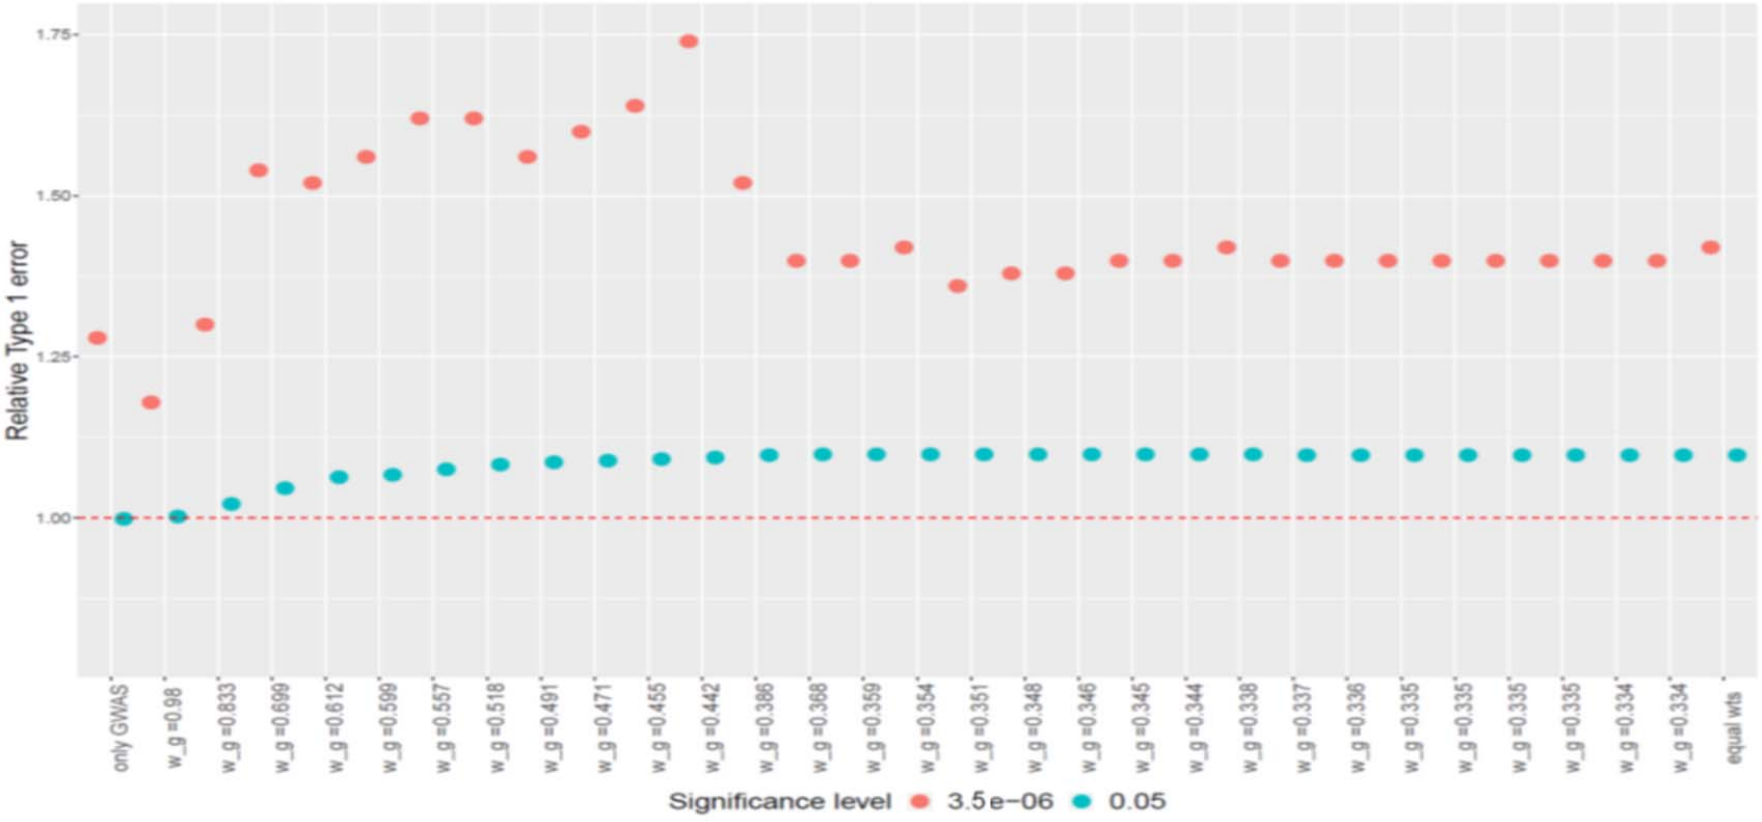

**Online Figure III.** C-statistics for multi-omics integration approach across different weights compositions of AFGen 2012 GWAS, methylation, and transcription in heart tissues.  $w_g$  is the relative weight of genotype data. NetWAS  $P$  value is the cutoff for defining “pre-positive” genes.

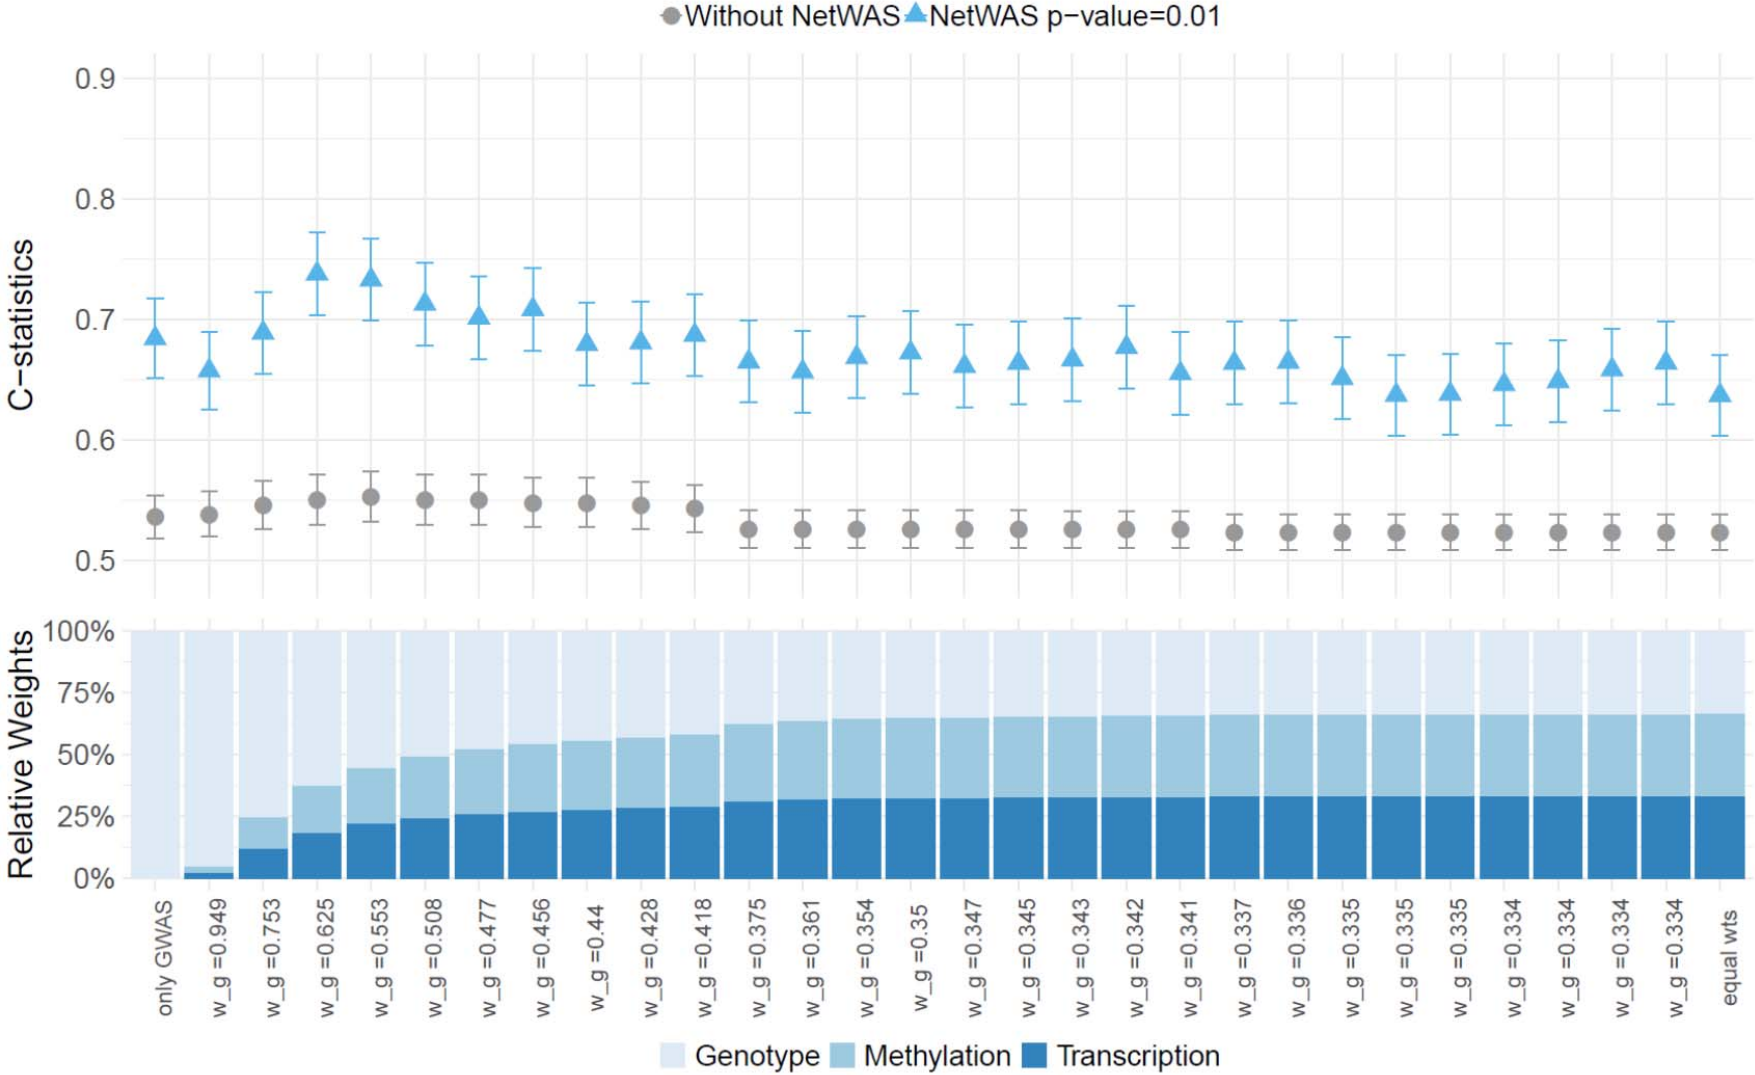

**Online Figure IV.** C-statistics for multi-omics integration approach across different weights compositions of FHS AF GWAS, methylation, and transcription by in heart tissues.  $w_g$  is the relative weight of genotype data. NetWAS  $P$  value is the cutoff for defining “pre-positive” genes.

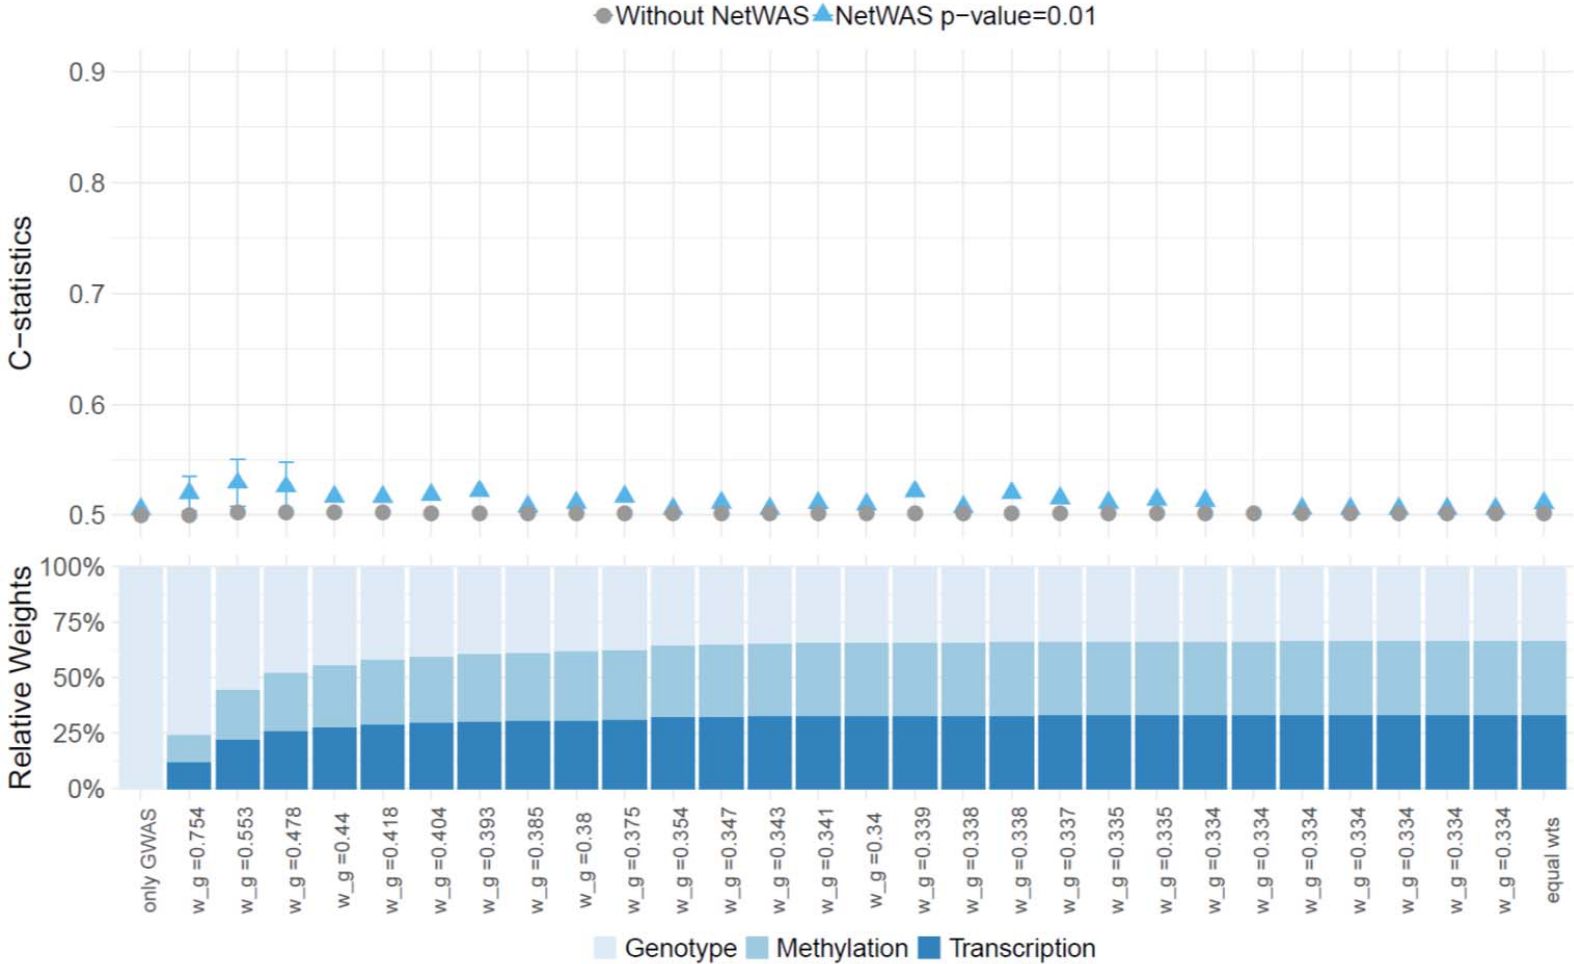

**Online Figure V.** The expression of AF-related genes by multi-omics integration across different tissues in GTEx.

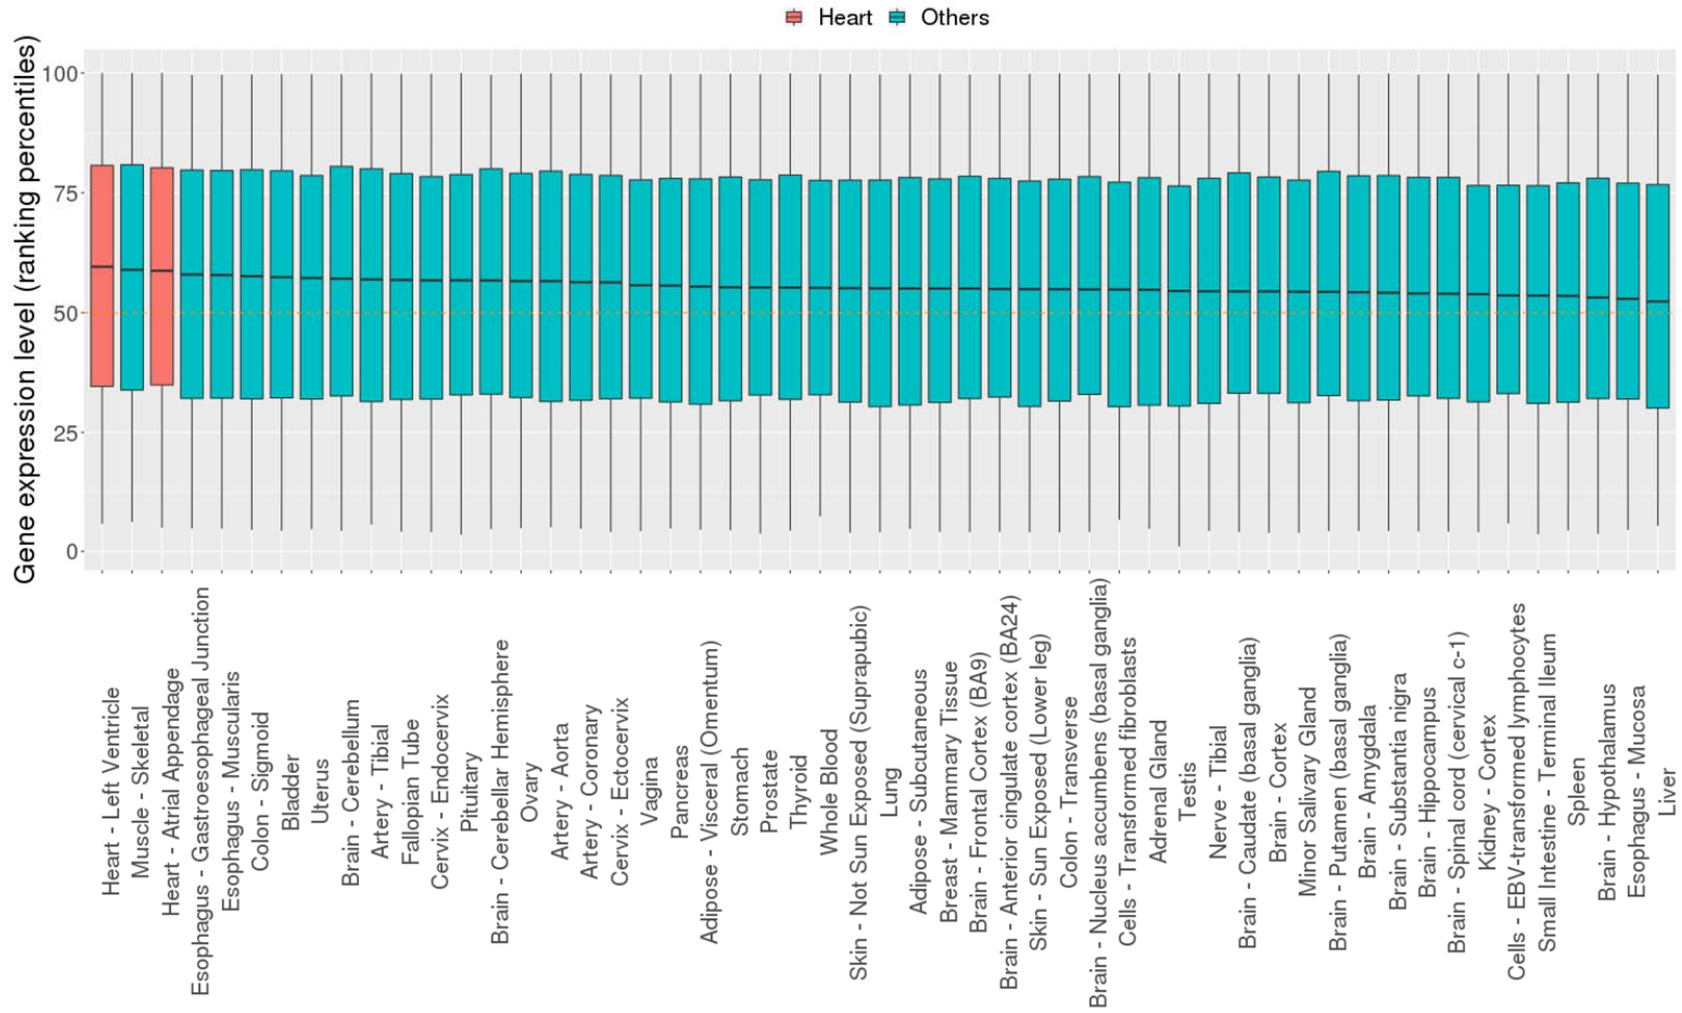

**Online Figure VI.** Spearman’s correlations of gene expression levels (in ranking percentiles) for the AF-related genes by multi-omics integration across different tissues in GTEx.

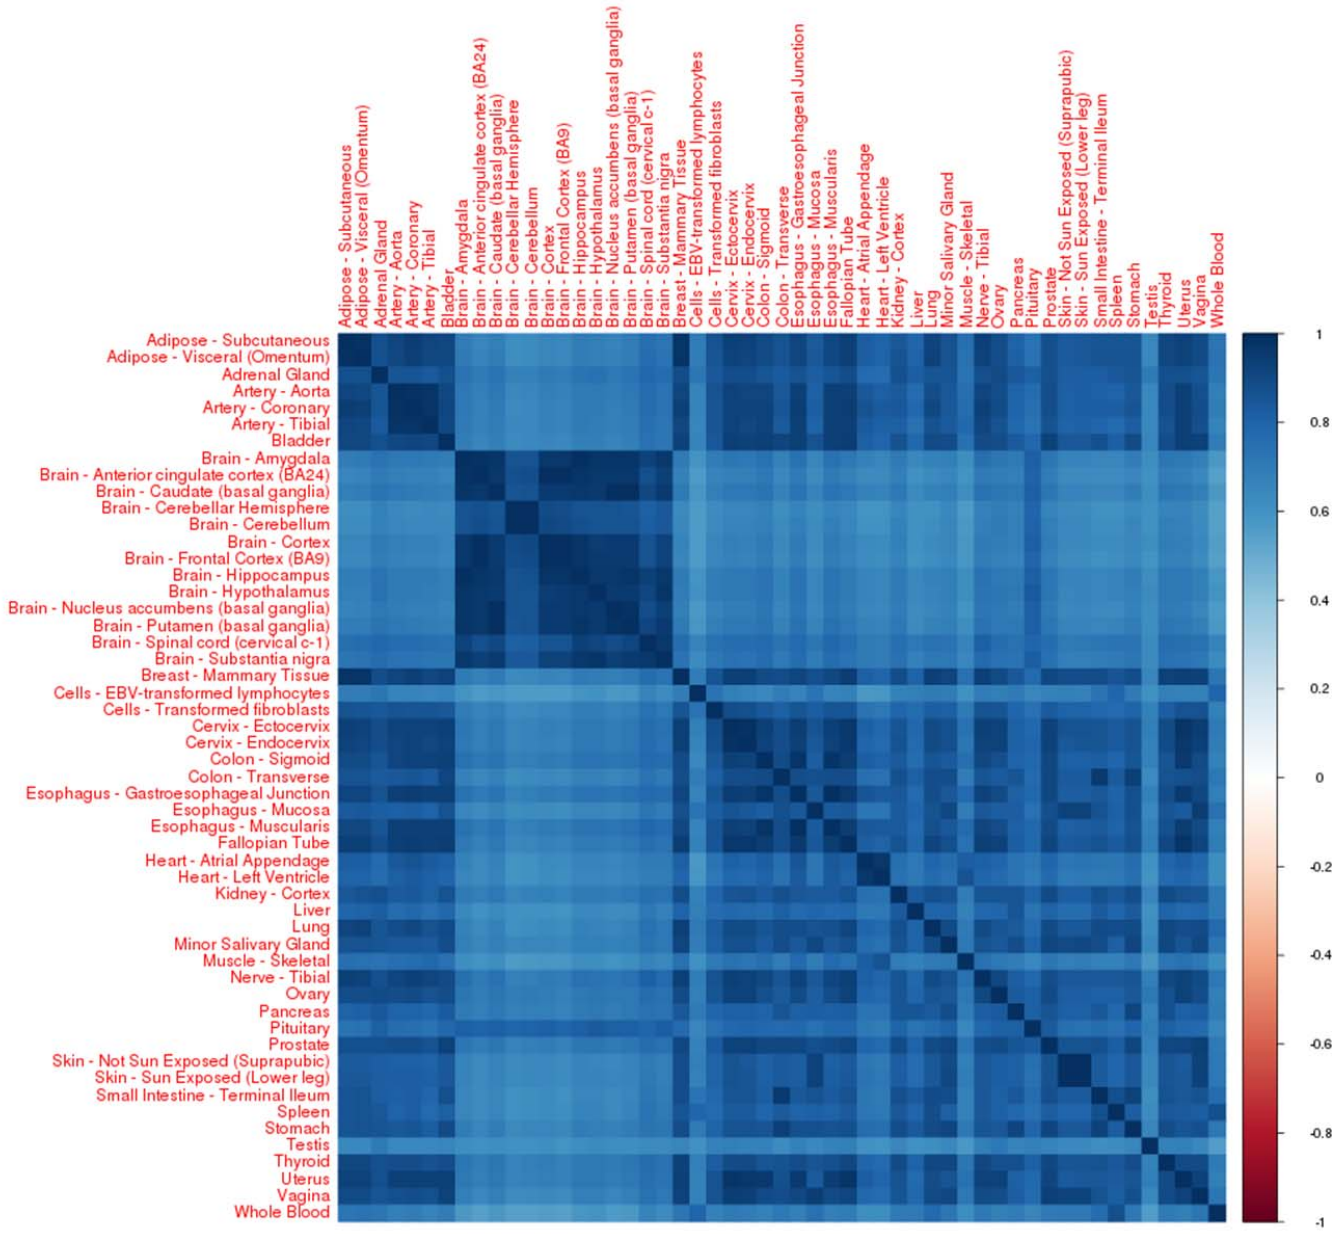

**Online Figure VII.** Spearman's correlation of  $-\log_{10}(P \text{ values})$  in association analysis of combining all CpGs versus CpGs in promoter region (annotated as "TSS1500", "TS200" and "5'UTR") of the gene.

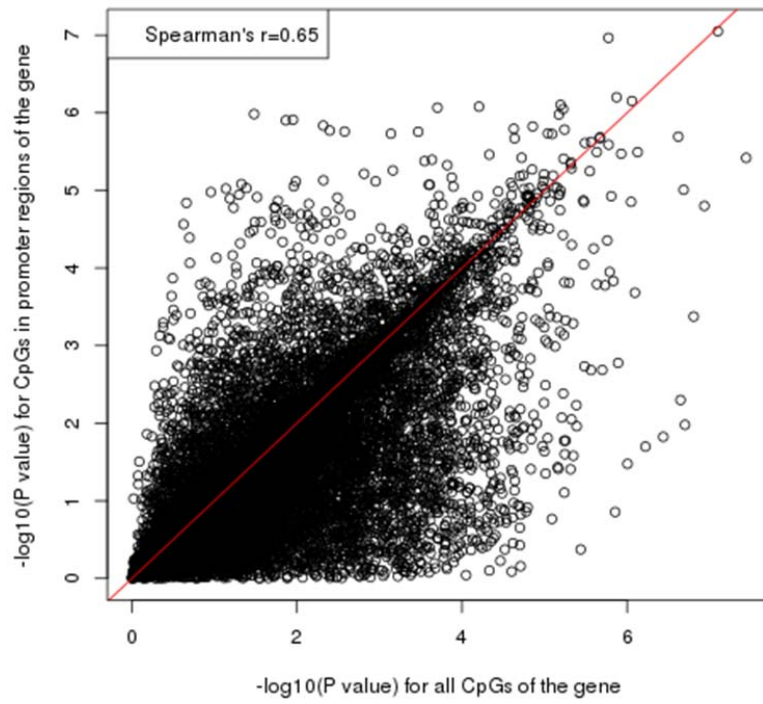

**Online Figure VIII.** Analysis flowchart of gene expression levels across multiple heart tissues.

❖ **For a specific tissue**

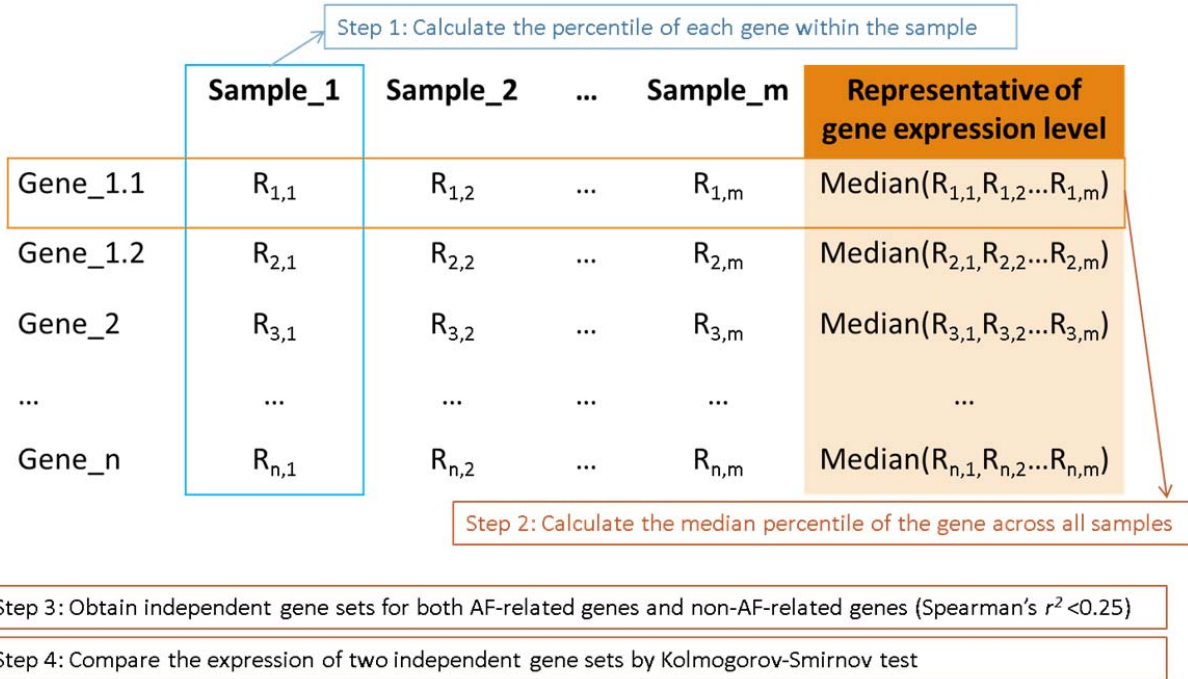



**Online Figure IX.** Total heritability estimates by HESS across different number of eigenvectors of the LD matrices for AFGen 2018 Europeans. The x-axis is the number of eigenvectors (k), while the y-axis is the total heritability, red dots are the variants with minor allele frequency (MAF) >1% while green dots are MAF>5%, and the number in the parenthesis are the total number of variants. Red dash line is the heritability estimates by LDSC regression as 0.0388 (SE=0.0041), and the green dash line is the heritability estimates by individual level data as 0.228 (SE=0.0454).

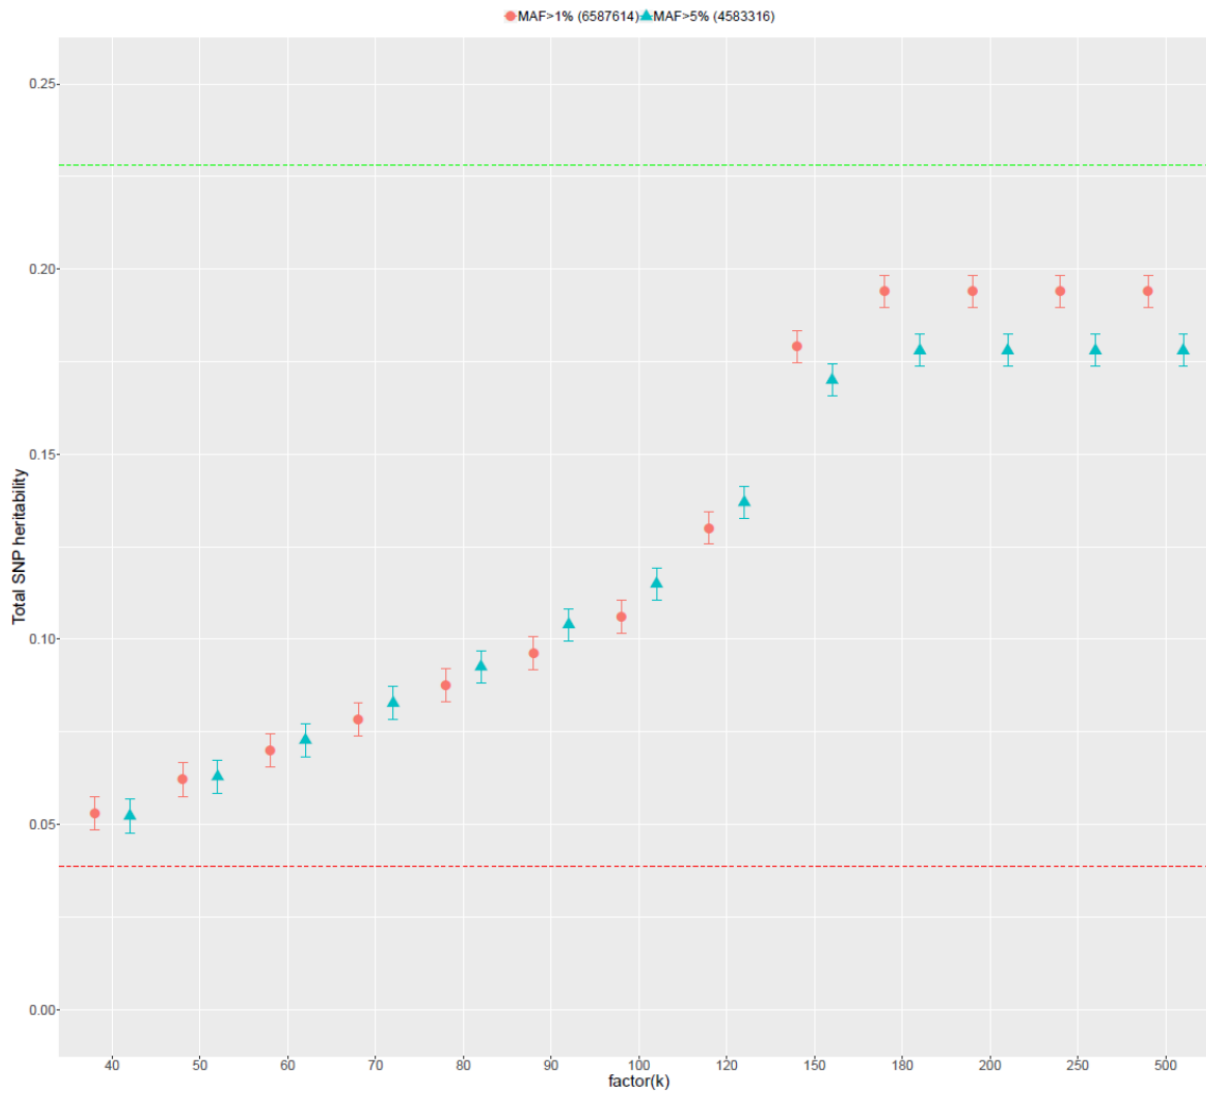

**Online Figure X.** Total heritability estimates by HESS across different number of eigenvectors of the LD matrices for UKBB European participants. The x-axis is the number of eigenvectors (k), while the y-axis is the total heritability, red dots are the variants with minor allele frequency (MAF) >1% while green dots are MAF>5%, and the number in the parenthesis are the total number of variants. Red dash line is the heritability estimates by LDSC regression as 0.1197 (SE=0.0344), and the green dash line is the heritability estimates by individual level data as 0.228 (SE=0.0454).

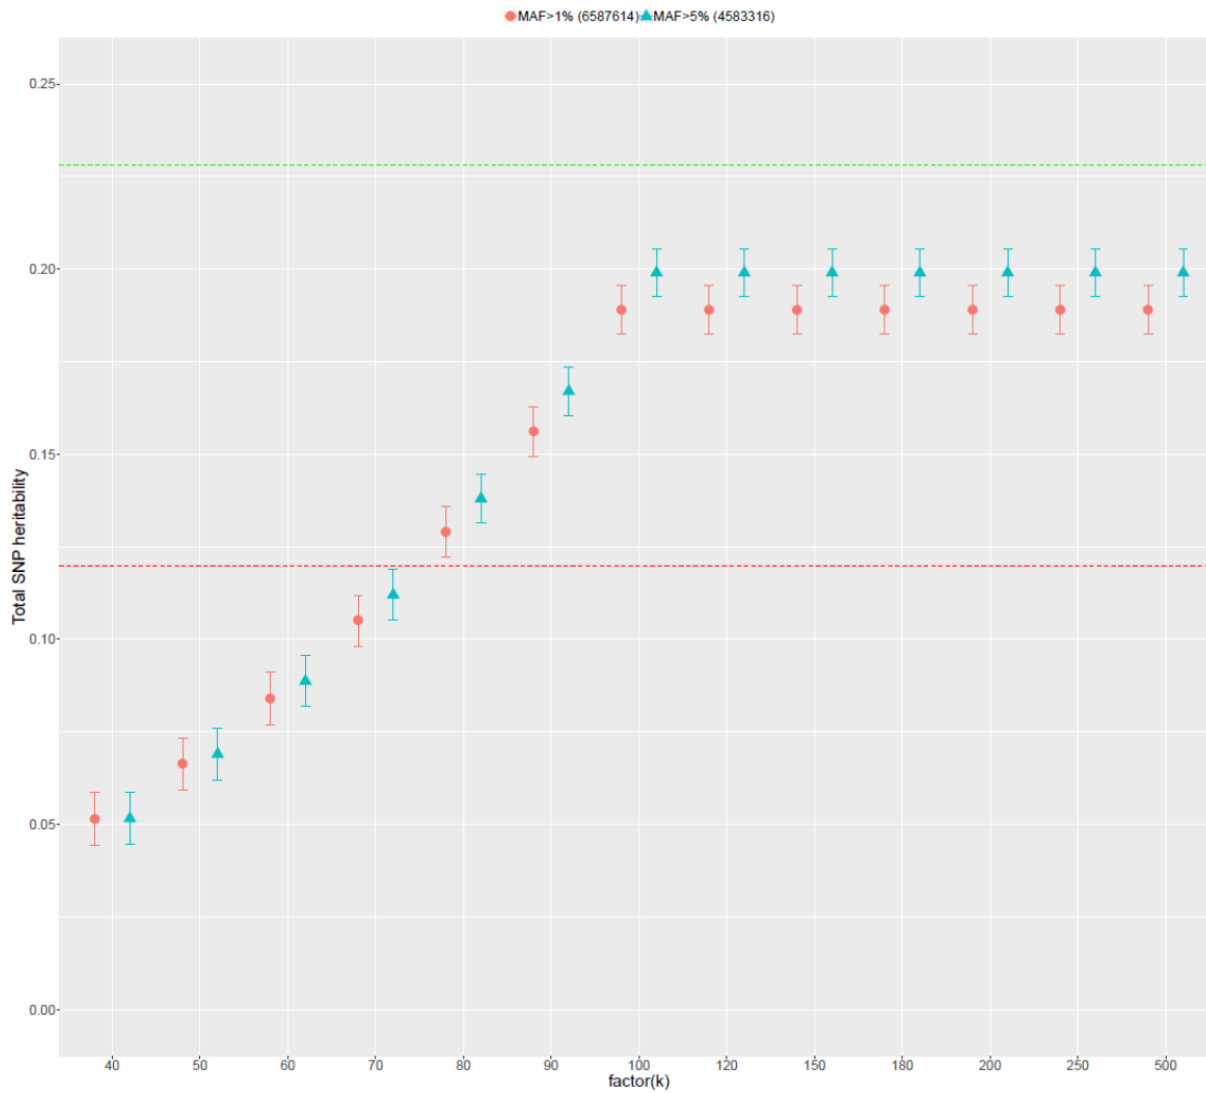

**Online Figure XI.** Screenshots of how to use the NetWAS online tool to run the analysis.

Submit a NetWAS Analysis 

Select a GWAS file for analysis (sample file: bmi-2012.txt) 

Choose File | af1kg\_metal\_...was\_4.2.txt

Select GWAS file type  

vegas

Select tissue context  

heart

Enter p-value threshold 

0.0000035

Enter email for receiving NetWAS results upon completion (optional)

Enter email

Enter a title to identify this NetWAS job (optional)

af1kg.4.2.p35r

Submit

Recent NetWAS jobs [\[Clear job history\]](#)

af1kg.4.2.p35r (19f26224-4535-41e0-8ae5-61bc3a5b109a)

completed

|                |                                      |
|----------------|--------------------------------------|
| Job id         | 19f26224-4535-41e0-8ae5-61bc3a5b109a |
| Created        | 2019-11-23T21:50:15                  |
| Title          | af1kg.4.2.p35r                       |
| Email          | [REDACTED]                           |
| GWAS file      | af1kg_metal_forNetwas_4.2.txt        |
| GWAS format    | vegas                                |
| Tissue context | heart                                |
| P-value        | 0.0000035                            |
| Log file       | log.txt                              |
| Results file   | results.txt                          |

**Download the result.txt**  
(Output one text file with annotation and three columns: Gene symbol, training label, and NetWAS score)

Upload gene-based summary statistics

Select a proper format of the GWAS results

Choose relevant tissue, e.g., heart for atrial

P value cutoff to determine "Pre-positive" gene

The summary statistics from meta-analysis can be downloaded from <https://drive.google.com/file/d/1X0GmYv8MYHO9RXioaihCSWOKCTFgNMjZ/view?usp=sharing>.

**Online Table I.** Correlations of genotype, methylation, and transcription calculated by their gene-based association *P* values with atrial fibrillation.

| Data            | FHS<br>GWAS | AFGen<br>2012<br>GWAS | AFGen<br>2017<br>GWAS | AFGen<br>2018<br>GWAS | FHS<br>EWAS | FHS<br>TWAS |
|-----------------|-------------|-----------------------|-----------------------|-----------------------|-------------|-------------|
| FHS GWAS        | 1           | 0.094                 | 0.043                 | 0.015                 | -0.009      | 0.01        |
| AFGen 2012 GWAS | 0.094       | 1                     | 0.269                 | 0.117                 | 0.056       | 0.026       |
| AFGen 2017 GWAS | 0.043       | 0.269                 | 1                     | 0.339                 | 0.06        | 0.005       |
| AFGen 2018 GWAS | 0.015       | 0.117                 | 0.339                 | 1                     | 0.065       | -0.008      |
| FHS EWAS        | -0.009      | 0.056                 | 0.06                  | 0.065                 | 1           | 0.022       |
| FHS TWAS        | 0.01        | 0.026                 | 0.005                 | -0.008                | 0.022       | 1           |

The cells with yellow high-lighted background are the correlation coefficients across different types of omics data by their Z statistics from association *P* values (e.g., GWAS-EWAS, GWAS-TWAS, and EWAS-TWAS). FHS: Framingham Heart Study.

**Online Table II.** Twenty-five tissue groups for tissue-specific enrichment analysis from GTEx.

| <b>Tissue</b>                         | <b>Tissue group</b> |
|---------------------------------------|---------------------|
| Adipose Subcutaneous                  | Adipose Tissue      |
| Adipose Visceral Omentum              | Adipose Tissue      |
| Adrenal Gland                         | Adrenal Gland       |
| Artery Aorta                          | Blood Vessel        |
| Artery Coronary                       | Blood Vessel        |
| Artery Tibial                         | Blood Vessel        |
| Brain Amygdala                        | Brain               |
| Brain Anterior cingulate cortex BA24  | Brain               |
| Brain Caudate basal ganglia           | Brain               |
| Brain Cerebellar Hemisphere           | Brain               |
| Brain Cerebellum                      | Brain               |
| Brain Cortex                          | Brain               |
| Brain Frontal Cortex BA9              | Brain               |
| Brain Hippocampus                     | Brain               |
| Brain Hypothalamus                    | Brain               |
| Brain Nucleus accumbens basal ganglia | Brain               |
| Brain Putamen basal ganglia           | Brain               |
| Brain Spinal cord cervical            | Brain               |
| Brain Substantia nigra                | Brain               |
| Breast Mammary Tissue                 | Breast              |
| Cells EBV transformed lymphocytes     | Not consider        |
| Cells Transformed fibroblasts         | Not consider        |
| Colon Transverse                      | Colon               |
| Esophagus Mucosa                      | Esophagus           |
| Esophagus Muscularis                  | Esophagus           |
| Fallopian Tube                        | Fallopian Tube      |
| Heart Atrial Appendage                | Heart               |
| Heart Left Ventricle                  | Heart               |
| Kidney Cortex                         | Kidney              |
| Liver                                 | Liver               |
| Lung                                  | Lung                |
| Muscle Skeletal                       | Muscle              |
| Nerve Tibial                          | Nerve               |
| Ovary                                 | Ovary               |
| Pancreas                              | Pancreas            |
| Pituitary                             | Pituitary           |
| Prostate                              | Prostate            |
| Skin Not Sun Exposed Suprapubic       | Skin                |
| Skin Sun Exposed Lower leg            | Skin                |
| Stomach                               | Stomach             |
| Testis                                | Testis              |
| Thyroid                               | Thyroid             |

| <b>Tissue</b> | <b>Tissue group</b> |
|---------------|---------------------|
| Uterus        | Uterus              |
| Vagina        | Vagina              |
| Whole Blood   | Whole Blood         |

**Online Table III.** Comparisons of performances of multi-omics integration approach by to the single GWAS analysis from AFGen 2017.

| Weights composition | With NetWAS |     |             |             |               | Without NetWAS |    |             |             |               |
|---------------------|-------------|-----|-------------|-------------|---------------|----------------|----|-------------|-------------|---------------|
|                     | Nf          | Nv  | Sensitivity | Specificity | Delta C-stats | Nf             | Nv | Sensitivity | Specificity | Delta C-stats |
| GWAS only (w_g=1)   | 378         | 103 | 0.500       | 0.981       | Ref           | 44             | 40 | 0.194       | 1.000       | Ref           |
| j=1 (w_g=0.98)      | 333         | 92  | 0.447       | 0.983       | -0.025        | 44             | 40 | 0.194       | 1.000       | 0.000         |
| j=2 (w_g=0.833)     | 583         | 130 | 0.631       | 0.968       | 0.059         | 48             | 43 | 0.209       | 1.000       | 0.007         |
| j=2.2 (w_g=0.802)   | 615         | 127 | 0.617       | 0.965       | 0.051         | 49             | 44 | 0.214       | 1.000       | 0.010         |
| j=2.4 (w_g=0.773)   | 628         | 122 | 0.592       | 0.964       | 0.038         | 50             | 44 | 0.214       | 1.000       | 0.010         |
| j=2.6 (w_g=0.746)   | 654         | 120 | 0.583       | 0.962       | 0.032         | 49             | 43 | 0.209       | 1.000       | 0.007         |
| j=2.8 (w_g=0.721)   | 654         | 120 | 0.583       | 0.962       | 0.032         | 49             | 43 | 0.209       | 1.000       | 0.007         |
| j=3 (w_g=0.699)     | 677         | 109 | 0.529       | 0.960       | 0.004         | 49             | 43 | 0.209       | 1.000       | 0.007         |
| j=3.2 (w_g=0.678)   | 720         | 118 | 0.573       | 0.957       | 0.025         | 49             | 42 | 0.204       | 1.000       | 0.005         |
| j=3.4 (w_g=0.659)   | 860         | 139 | 0.675       | 0.949       | 0.072         | 49             | 41 | 0.199       | 0.999       | 0.002         |
| j=3.6 (w_g=0.642)   | 873         | 136 | 0.660       | 0.948       | 0.064         | 49             | 40 | 0.194       | 0.999       | 0.000         |
| j=3.8 (w_g=0.627)   | 880         | 130 | 0.631       | 0.947       | 0.049         | 50             | 40 | 0.194       | 0.999       | 0.000         |
| j=4 (w_g=0.612)     | 900         | 136 | 0.660       | 0.946       | 0.063         | 50             | 40 | 0.194       | 0.999       | 0.000         |
| j=4.2 (w_g=0.599)   | 978         | 141 | 0.684       | 0.941       | 0.072         | 50             | 40 | 0.194       | 0.999       | 0.000         |
| j=4.4 (w_g=0.587)   | 954         | 136 | 0.660       | 0.942       | 0.061         | 50             | 40 | 0.194       | 0.999       | 0.000         |
| j=4.6 (w_g=0.576)   | 1041        | 141 | 0.684       | 0.936       | 0.070         | 52             | 41 | 0.199       | 0.999       | 0.002         |
| j=4.8 (w_g=0.566)   | 1039        | 131 | 0.636       | 0.936       | 0.046         | 52             | 41 | 0.199       | 0.999       | 0.002         |
| j=5 (w_g=0.557)     | 980         | 132 | 0.641       | 0.940       | 0.050         | 54             | 42 | 0.204       | 0.999       | 0.005         |
| j=5.2 (w_g=0.548)   | 1135        | 136 | 0.660       | 0.929       | 0.054         | 54             | 41 | 0.199       | 0.999       | 0.002         |
| j=5.4 (w_g=0.54)    | 1153        | 129 | 0.626       | 0.928       | 0.037         | 54             | 40 | 0.194       | 0.999       | 0.000         |
| j=5.6 (w_g=0.532)   | 1195        | 129 | 0.626       | 0.925       | 0.035         | 53             | 39 | 0.189       | 0.999       | -0.003        |
| j=5.8 (w_g=0.525)   | 1230        | 137 | 0.665       | 0.923       | 0.054         | 54             | 39 | 0.189       | 0.999       | -0.003        |
| j=6 (w_g=0.518)     | 1323        | 136 | 0.660       | 0.916       | 0.048         | 53             | 38 | 0.184       | 0.999       | -0.005        |
| j=6.2 (w_g=0.512)   | 1355        | 142 | 0.689       | 0.914       | 0.061         | 53             | 38 | 0.184       | 0.999       | -0.005        |
| j=6.4 (w_g=0.506)   | 1334        | 137 | 0.665       | 0.915       | 0.050         | 52             | 37 | 0.180       | 0.999       | -0.008        |
| j=6.6 (w_g=0.501)   | 1339        | 130 | 0.631       | 0.914       | 0.033         | 52             | 37 | 0.180       | 0.999       | -0.008        |
| j=6.8 (w_g=0.496)   | 1418        | 141 | 0.684       | 0.910       | 0.057         | 52             | 37 | 0.180       | 0.999       | -0.008        |
| j=7 (w_g=0.491)     | 1452        | 145 | 0.704       | 0.908       | 0.065         | 51             | 37 | 0.180       | 0.999       | -0.008        |
| j=7.2 (w_g=0.486)   | 1462        | 142 | 0.689       | 0.907       | 0.058         | 51             | 37 | 0.180       | 0.999       | -0.008        |
| j=7.4 (w_g=0.482)   | 1506        | 144 | 0.699       | 0.904       | 0.061         | 52             | 37 | 0.180       | 0.999       | -0.008        |
| j=7.6 (w_g=0.478)   | 1427        | 133 | 0.646       | 0.908       | 0.037         | 53             | 37 | 0.180       | 0.999       | -0.008        |
| j=7.8 (w_g=0.474)   | 1512        | 144 | 0.699       | 0.903       | 0.061         | 52             | 36 | 0.175       | 0.999       | -0.010        |
| j=8 (w_g=0.471)     | 1506        | 140 | 0.680       | 0.903       | 0.051         | 52             | 36 | 0.175       | 0.999       | -0.010        |
| j=8.2 (w_g=0.467)   | 1459        | 130 | 0.631       | 0.906       | 0.028         | 52             | 36 | 0.175       | 0.999       | -0.010        |
| j=8.4 (w_g=0.464)   | 1475        | 137 | 0.665       | 0.905       | 0.045         | 52             | 36 | 0.175       | 0.999       | -0.010        |
| j=8.6 (w_g=0.461)   | 1524        | 134 | 0.650       | 0.902       | 0.036         | 52             | 36 | 0.175       | 0.999       | -0.010        |
| j=8.8 (w_g=0.458)   | 1504        | 138 | 0.670       | 0.903       | 0.046         | 52             | 36 | 0.175       | 0.999       | -0.010        |
| j=9 (w_g=0.455)     | 1619        | 144 | 0.699       | 0.896       | 0.057         | 53             | 36 | 0.175       | 0.999       | -0.010        |
| j=9.2 (w_g=0.452)   | 1591        | 145 | 0.704       | 0.898       | 0.061         | 52             | 35 | 0.170       | 0.999       | -0.013        |
| j=9.4 (w_g=0.449)   | 1614        | 142 | 0.689       | 0.896       | 0.052         | 51             | 34 | 0.165       | 0.999       | -0.015        |
| j=9.6 (w_g=0.447)   | 1651        | 139 | 0.675       | 0.893       | 0.044         | 51             | 34 | 0.165       | 0.999       | -0.015        |
| j=9.8 (w_g=0.444)   | 1654        | 145 | 0.704       | 0.893       | 0.058         | 50             | 33 | 0.160       | 0.999       | -0.017        |

| Weights composition       | With NetWAS |     |             |             |               | Without NetWAS |    |             |             |               |
|---------------------------|-------------|-----|-------------|-------------|---------------|----------------|----|-------------|-------------|---------------|
|                           | Nf          | Nv  | Sensitivity | Specificity | Delta C-stats | Nf             | Nv | Sensitivity | Specificity | Delta C-stats |
| j=10 (w_g=0.442)          | 1673        | 144 | 0.699       | 0.892       | 0.055         | 47             | 32 | 0.155       | 0.999       | -0.020        |
| j=20 (w_g=0.386)          | 1613        | 113 | 0.549       | 0.894       | -0.019        | 45             | 26 | 0.126       | 0.999       | -0.035        |
| j=30 (w_g=0.368)          | 1681        | 112 | 0.544       | 0.889       | -0.024        | 46             | 25 | 0.121       | 0.999       | -0.037        |
| j=40 (w_g=0.359)          | 1667        | 109 | 0.529       | 0.890       | -0.031        | 45             | 22 | 0.107       | 0.998       | -0.044        |
| j=50 (w_g=0.354)          | 1758        | 104 | 0.505       | 0.883       | -0.046        | 46             | 22 | 0.107       | 0.998       | -0.044        |
| j=60 (w_g=0.351)          | 1740        | 107 | 0.519       | 0.885       | -0.038        | 45             | 21 | 0.102       | 0.998       | -0.047        |
| j=70 (w_g=0.348)          | 1635        | 96  | 0.466       | 0.891       | -0.062        | 45             | 21 | 0.102       | 0.998       | -0.047        |
| j=80 (w_g=0.346)          | 1686        | 101 | 0.490       | 0.888       | -0.051        | 45             | 21 | 0.102       | 0.998       | -0.047        |
| j=90 (w_g=0.345)          | 1739        | 96  | 0.466       | 0.884       | -0.065        | 45             | 21 | 0.102       | 0.998       | -0.047        |
| j=100 (w_g=0.344)         | 1691        | 97  | 0.471       | 0.887       | -0.061        | 45             | 21 | 0.102       | 0.998       | -0.047        |
| j=200 (w_g=0.338)         | 1695        | 103 | 0.500       | 0.887       | -0.047        | 47             | 21 | 0.102       | 0.998       | -0.047        |
| j=300 (w_g=0.337)         | 1656        | 99  | 0.481       | 0.890       | -0.055        | 47             | 21 | 0.102       | 0.998       | -0.047        |
| j=400 (w_g=0.336)         | 1556        | 92  | 0.447       | 0.896       | -0.069        | 47             | 21 | 0.102       | 0.998       | -0.047        |
| j=500 (w_g=0.335)         | 1475        | 89  | 0.432       | 0.902       | -0.073        | 47             | 21 | 0.102       | 0.998       | -0.047        |
| j=600 (w_g=0.335)         | 1512        | 94  | 0.456       | 0.900       | -0.062        | 47             | 21 | 0.102       | 0.998       | -0.047        |
| j=700 (w_g=0.335)         | 1477        | 84  | 0.408       | 0.901       | -0.086        | 46             | 21 | 0.102       | 0.998       | -0.047        |
| j=800 (w_g=0.335)         | 1486        | 90  | 0.437       | 0.901       | -0.071        | 46             | 21 | 0.102       | 0.998       | -0.047        |
| j=900 (w_g=0.334)         | 1495        | 89  | 0.432       | 0.901       | -0.074        | 46             | 21 | 0.102       | 0.998       | -0.047        |
| j=1000 (w_g=0.334)        | 1526        | 87  | 0.422       | 0.898       | -0.080        | 46             | 21 | 0.102       | 0.998       | -0.047        |
| Equal weights (w_g=0.333) | 1535        | 85  | 0.413       | 0.897       | -0.085        | 46             | 21 | 0.102       | 0.998       | -0.047        |

The  $j$  is the parameter as the weights function of number of AF cases during association studies,  $w_i = N_{case_i}^{1/j}$ , where  $w$  is the weight for specific omics data,  $N$  is the number of AF cases (the number of AF cases are 17,931, 183, and 177 for genotype, methylation, and transcription respectively),  $j$  is a sequence of numbers, and  $i$  is the type of data ( $i$ = GWAS, EWAS, or TWAS),  $w_g$  is the relative weight of GWAS,

$$w_g = \frac{\sqrt[j]{N_{case_{GWAS}}}}{(\sqrt[j]{N_{case_{GWAS}}} + \sqrt[j]{N_{case_{EWAS}}} + \sqrt[j]{N_{case_{TWAS}}})}$$

Nf is the total number of genes found by the integration approach, Nv is the number of genes validated by the reference gene set (AFGen 2018 GWAS), Delta C-stats is the difference of C-stats of C-stats (with omics integration) minus the reference C-stats (only GWAS).

The optimal weights are the weights compositions when we have a maximum positive delta C-statistics comparing to Only GWAS. The optimal weights with NetWAS is  $j=4.2$  ( $w_g=0.599$ , Delta C-stats = 0.07236).



**Online Table IV.** Number of AF-related genes by GWAS only versus by multi-omics when reached the optimal C-statistics.

| Parameters                             | Number of AF-related genes (by 2017 GWAS only) | Number of AF-related genes (by 2017 GWAS + EWAS + TWAS) |
|----------------------------------------|------------------------------------------------|---------------------------------------------------------|
| Without NetWAS                         | 44                                             | 49                                                      |
| NetWAS Heart ( $P=3.5\times 10^{-6}$ ) | 10                                             | 15                                                      |
| NetWAS Heart ( $P=0.0001$ )            | 26                                             | 69                                                      |
| NetWAS Heart ( $P=0.01$ )              | 378                                            | 978                                                     |
| NetWAS Heart ( $P=0.1$ )               | 1,700                                          | 2,627                                                   |
| NetWAS Whole blood ( $P=0.01$ )        | 276                                            | 630                                                     |

**Online Table V.** Comparisons of AF-associated genes by our multi-omics approach with other GWAS studies, GWAS catalog, Open Targets Platform, OMIM.

| Gene           | Multi-omics integration | Gene-based result from AFGen 2017 GWAS | Gene-based result from AFGen 2018 GWAS | Meta-analysis of SNPs by two large AF GWAS in 2018 | GWAS catalog | Open Targets Platform | OMIM |
|----------------|-------------------------|----------------------------------------|----------------------------------------|----------------------------------------------------|--------------|-----------------------|------|
| <i>AICF</i>    | 0                       | 0                                      | 0                                      | 0                                                  | 0            | 1                     | 0    |
| <i>A2M</i>     | 0                       | 0                                      | 0                                      | 0                                                  | 0            | 1                     | 0    |
| <i>A4GALT</i>  | 1                       | 0                                      | 0                                      | 0                                                  | 0            | 0                     | 0    |
| <i>AAGAB</i>   | 1                       | 0                                      | 0                                      | 0                                                  | 0            | 0                     | 0    |
| <i>AAK1</i>    | 1                       | 0                                      | 0                                      | 0                                                  | 0            | 0                     | 0    |
| <i>AAT8</i>    | 0                       | 0                                      | 0                                      | 0                                                  | 0            | 0                     | 1    |
| <i>AAT9</i>    | 0                       | 0                                      | 0                                      | 0                                                  | 0            | 0                     | 1    |
| <i>ABCA1</i>   | 1                       | 0                                      | 0                                      | 0                                                  | 0            | 1                     | 0    |
| <i>ABCA12</i>  | 0                       | 0                                      | 0                                      | 0                                                  | 1            | 1                     | 0    |
| <i>ABCA3</i>   | 1                       | 0                                      | 0                                      | 0                                                  | 0            | 0                     | 0    |
| <i>ABCB1</i>   | 0                       | 0                                      | 0                                      | 0                                                  | 0            | 1                     | 0    |
| <i>ABCB4</i>   | 0                       | 0                                      | 0                                      | 0                                                  | 0            | 1                     | 0    |
| <i>ABCB8</i>   | 1                       | 0                                      | 0                                      | 0                                                  | 0            | 0                     | 0    |
| <i>ABCB9</i>   | 1                       | 0                                      | 0                                      | 0                                                  | 0            | 0                     | 0    |
| <i>ABCC9</i>   | 0                       | 0                                      | 0                                      | 0                                                  | 0            | 0                     | 1    |
| <i>ABCD2</i>   | 0                       | 0                                      | 0                                      | 0                                                  | 0            | 1                     | 0    |
| <i>ABCD3</i>   | 0                       | 0                                      | 0                                      | 0                                                  | 0            | 1                     | 0    |
| <i>ABCD4</i>   | 1                       | 0                                      | 0                                      | 0                                                  | 0            | 0                     | 0    |
| <i>ABCG2</i>   | 0                       | 0                                      | 0                                      | 0                                                  | 0            | 1                     | 0    |
| <i>ABHD10</i>  | 0                       | 0                                      | 1                                      | 0                                                  | 0            | 0                     | 0    |
| <i>ABHD17C</i> | 0                       | 0                                      | 0                                      | 1                                                  | 1            | 0                     | 0    |
| <i>ABHD6</i>   | 1                       | 0                                      | 0                                      | 0                                                  | 0            | 0                     | 0    |
| <i>ABI1</i>    | 1                       | 0                                      | 0                                      | 0                                                  | 0            | 1                     | 0    |
| <i>ABL1</i>    | 0                       | 0                                      | 0                                      | 0                                                  | 0            | 1                     | 0    |
| <i>ABL2</i>    | 1                       | 0                                      | 0                                      | 0                                                  | 0            | 0                     | 0    |
| <i>ABLIM1</i>  | 1                       | 0                                      | 0                                      | 0                                                  | 0            | 0                     | 0    |
| <i>ABO</i>     | 0                       | 0                                      | 0                                      | 0                                                  | 0            | 1                     | 0    |
| <i>ABS2</i>    | 0                       | 0                                      | 0                                      | 0                                                  | 0            | 0                     | 1    |
| <i>ACAA1</i>   | 1                       | 0                                      | 0                                      | 0                                                  | 0            | 0                     | 0    |
| <i>ACACA</i>   | 1                       | 0                                      | 0                                      | 0                                                  | 0            | 0                     | 0    |
| <i>ACAD8</i>   | 1                       | 0                                      | 0                                      | 0                                                  | 0            | 0                     | 0    |
| <i>ACADS</i>   | 0                       | 0                                      | 0                                      | 0                                                  | 0            | 1                     | 0    |
| <i>ACAP1</i>   | 1                       | 0                                      | 0                                      | 0                                                  | 0            | 0                     | 0    |
| <i>ACBD4</i>   | 1                       | 0                                      | 0                                      | 0                                                  | 0            | 0                     | 0    |
| <i>ACDMPV</i>  | 0                       | 0                                      | 0                                      | 0                                                  | 0            | 0                     | 1    |
| <i>ACE</i>     | 0                       | 0                                      | 0                                      | 0                                                  | 0            | 1                     | 0    |
| <i>ACE2</i>    | 0                       | 0                                      | 0                                      | 0                                                  | 0            | 1                     | 0    |
| <i>ACG2</i>    | 0                       | 0                                      | 0                                      | 0                                                  | 0            | 0                     | 1    |
| <i>ACHE</i>    | 0                       | 0                                      | 0                                      | 0                                                  | 0            | 1                     | 0    |
| <i>ACP5</i>    | 0                       | 0                                      | 0                                      | 0                                                  | 0            | 1                     | 0    |
| <i>ACP6</i>    | 1                       | 0                                      | 0                                      | 0                                                  | 0            | 0                     | 0    |
| <i>ACR</i>     | 0                       | 0                                      | 0                                      | 0                                                  | 0            | 1                     | 0    |

| Gene                       | Multi-omics integration | Gene-based result from AFGen 2017 GWAS | Gene-based result from AFGen 2018 GWAS | Meta-analysis of SNPs by two large AF GWAS in 2018 | GWAS catalog | Open Targets Platform | OMIM |
|----------------------------|-------------------------|----------------------------------------|----------------------------------------|----------------------------------------------------|--------------|-----------------------|------|
| <i>ACSL1</i>               | 0                       | 0                                      | 0                                      | 0                                                  | 0            | 1                     | 0    |
| <i>ACSL6</i>               | 1                       | 0                                      | 0                                      | 0                                                  | 0            | 0                     | 0    |
| <i>ACSM3</i>               | 0                       | 0                                      | 0                                      | 0                                                  | 0            | 1                     | 0    |
| <i>ACTB</i>                | 0                       | 0                                      | 0                                      | 0                                                  | 0            | 1                     | 0    |
| <i>ACTC1</i>               | 1                       | 0                                      | 0                                      | 0                                                  | 0            | 0                     | 1    |
| <i>ACTN2</i>               | 0                       | 0                                      | 0                                      | 0                                                  | 0            | 1                     | 1    |
| <i>ACTN4</i>               | 1                       | 0                                      | 0                                      | 0                                                  | 0            | 0                     | 0    |
| <i>ACTR1A</i>              | 1                       | 0                                      | 0                                      | 0                                                  | 0            | 0                     | 0    |
| <i>ACTR2</i>               | 1                       | 0                                      | 0                                      | 0                                                  | 0            | 0                     | 0    |
| <i>ACTR8</i>               | 1                       | 0                                      | 0                                      | 0                                                  | 0            | 0                     | 0    |
| <i>ACVR1B</i>              | 0                       | 0                                      | 0                                      | 0                                                  | 0            | 1                     | 0    |
| <i>ACVR2A</i>              | 1                       | 0                                      | 1                                      | 0                                                  | 0            | 0                     | 0    |
| <i>ACVR2B</i>              | 0                       | 0                                      | 0                                      | 0                                                  | 0            | 0                     | 1    |
| <i>ACVRL1</i>              | 0                       | 0                                      | 0                                      | 0                                                  | 0            | 0                     | 1    |
| <i>ADA</i>                 | 0                       | 0                                      | 0                                      | 0                                                  | 0            | 1                     | 0    |
| <i>ADAM15</i>              | 1                       | 0                                      | 1                                      | 0                                                  | 0            | 0                     | 0    |
| <i>ADAM17</i>              | 1                       | 0                                      | 0                                      | 0                                                  | 0            | 0                     | 0    |
| <i>ADAM32</i>              | 1                       | 0                                      | 0                                      | 0                                                  | 0            | 0                     | 0    |
| <i>ADAMTS1</i><br><i>3</i> | 0                       | 0                                      | 0                                      | 0                                                  | 0            | 1                     | 0    |
| <i>ADAMTS1</i><br><i>4</i> | 1                       | 0                                      | 0                                      | 0                                                  | 0            | 0                     | 0    |
| <i>ADAPI</i>               | 1                       | 0                                      | 1                                      | 0                                                  | 0            | 0                     | 0    |
| <i>ADAP2</i>               | 0                       | 0                                      | 0                                      | 0                                                  | 0            | 0                     | 1    |
| <i>ADAT2</i>               | 1                       | 0                                      | 0                                      | 0                                                  | 0            | 0                     | 0    |
| <i>ADCY10</i>              | 0                       | 0                                      | 0                                      | 0                                                  | 0            | 1                     | 0    |
| <i>ADCY3</i>               | 1                       | 0                                      | 0                                      | 0                                                  | 0            | 0                     | 0    |
| <i>ADCY4</i>               | 1                       | 0                                      | 0                                      | 0                                                  | 0            | 0                     | 0    |
| <i>ADCY6</i>               | 1                       | 0                                      | 0                                      | 0                                                  | 0            | 0                     | 0    |
| <i>ADCYAP1</i>             | 0                       | 0                                      | 0                                      | 0                                                  | 0            | 1                     | 0    |
| <i>ADGB</i>                | 0                       | 0                                      | 0                                      | 0                                                  | 0            | 1                     | 0    |
| <i>ADGRD1</i>              | 0                       | 0                                      | 0                                      | 0                                                  | 0            | 1                     | 0    |
| <i>ADH1B</i>               | 0                       | 0                                      | 0                                      | 0                                                  | 0            | 1                     | 0    |
| <i>ADIPOR1</i>             | 1                       | 0                                      | 0                                      | 0                                                  | 0            | 0                     | 0    |
| <i>ADK</i>                 | 0                       | 0                                      | 0                                      | 0                                                  | 0            | 1                     | 0    |
| <i>ADM</i>                 | 0                       | 0                                      | 0                                      | 0                                                  | 0            | 1                     | 0    |
| <i>ADM2</i>                | 0                       | 0                                      | 0                                      | 0                                                  | 0            | 1                     | 0    |
| <i>ADORA1</i>              | 1                       | 0                                      | 0                                      | 0                                                  | 0            | 1                     | 0    |
| <i>ADORA2A</i>             | 0                       | 0                                      | 0                                      | 0                                                  | 0            | 1                     | 0    |
| <i>ADORA2B</i>             | 0                       | 0                                      | 0                                      | 0                                                  | 0            | 1                     | 1    |
| <i>ADORA3</i>              | 0                       | 0                                      | 0                                      | 0                                                  | 0            | 1                     | 1    |
| <i>ADPGK</i>               | 1                       | 0                                      | 0                                      | 0                                                  | 0            | 0                     | 0    |
| <i>ADRA1A</i>              | 0                       | 0                                      | 0                                      | 0                                                  | 0            | 1                     | 0    |
| <i>ADRA1B</i>              | 0                       | 0                                      | 0                                      | 0                                                  | 0            | 1                     | 1    |

| Gene             | Multi-omics integration | Gene-based result from AFGen 2017 GWAS | Gene-based result from AFGen 2018 GWAS | Meta-analysis of SNPs by two large AF GWAS in 2018 | GWAS catalog | Open Targets Platform | OMIM |
|------------------|-------------------------|----------------------------------------|----------------------------------------|----------------------------------------------------|--------------|-----------------------|------|
| <i>ADRA1D</i>    | 1                       | 0                                      | 0                                      | 0                                                  | 0            | 1                     | 0    |
| <i>ADRB1</i>     | 0                       | 0                                      | 0                                      | 0                                                  | 0            | 1                     | 0    |
| <i>ADRB2</i>     | 1                       | 0                                      | 0                                      | 0                                                  | 0            | 1                     | 0    |
| <i>ADRB3</i>     | 0                       | 0                                      | 0                                      | 0                                                  | 0            | 1                     | 0    |
| <i>ADSS</i>      | 1                       | 0                                      | 0                                      | 0                                                  | 0            | 0                     | 0    |
| <i>AEBP1</i>     | 1                       | 0                                      | 0                                      | 0                                                  | 0            | 0                     | 0    |
| <i>AFAP1</i>     | 0                       | 0                                      | 0                                      | 0                                                  | 0            | 1                     | 0    |
| <i>AFDN</i>      | 0                       | 0                                      | 0                                      | 0                                                  | 0            | 1                     | 0    |
| <i>AGBL4</i>     | 0                       | 0                                      | 0                                      | 1                                                  | 1            | 0                     | 0    |
| <i>AGER</i>      | 0                       | 0                                      | 0                                      | 0                                                  | 0            | 1                     | 0    |
| <i>AGOTC</i>     | 0                       | 0                                      | 0                                      | 0                                                  | 0            | 0                     | 1    |
| <i>AGPAT1</i>    | 1                       | 0                                      | 0                                      | 0                                                  | 0            | 0                     | 0    |
| <i>AGPAT3</i>    | 1                       | 0                                      | 0                                      | 0                                                  | 0            | 0                     | 0    |
| <i>AGR2</i>      | 1                       | 0                                      | 0                                      | 0                                                  | 0            | 0                     | 0    |
| <i>AGR3</i>      | 1                       | 0                                      | 0                                      | 0                                                  | 0            | 0                     | 0    |
| <i>AGT</i>       | 0                       | 0                                      | 0                                      | 0                                                  | 0            | 1                     | 1    |
| <i>AGTR1</i>     | 0                       | 0                                      | 0                                      | 0                                                  | 0            | 1                     | 1    |
| <i>AGXT</i>      | 0                       | 0                                      | 0                                      | 0                                                  | 0            | 1                     | 0    |
| <i>AHRR</i>      | 1                       | 0                                      | 0                                      | 0                                                  | 0            | 0                     | 0    |
| <i>AHSP</i>      | 0                       | 0                                      | 0                                      | 0                                                  | 0            | 1                     | 0    |
| <i>AIF1</i>      | 1                       | 0                                      | 0                                      | 0                                                  | 0            | 0                     | 0    |
| <i>AIRE</i>      | 1                       | 0                                      | 0                                      | 0                                                  | 0            | 0                     | 0    |
| <i>AK1</i>       | 0                       | 0                                      | 0                                      | 0                                                  | 0            | 1                     | 0    |
| <i>AKAP10</i>    | 0                       | 0                                      | 0                                      | 0                                                  | 0            | 1                     | 0    |
| <i>AKAP5</i>     | 1                       | 0                                      | 0                                      | 0                                                  | 0            | 0                     | 0    |
| <i>AKAP6</i>     | 1                       | 0                                      | 1                                      | 1                                                  | 1            | 1                     | 0    |
| <i>AKIRIN2</i>   | 1                       | 0                                      | 0                                      | 0                                                  | 0            | 0                     | 0    |
| <i>AKR1B1P</i>   | 0                       | 0                                      | 0                                      | 0                                                  | 1            | 0                     | 0    |
| 6                |                         |                                        |                                        |                                                    |              |                       |      |
| <i>AKT2</i>      | 1                       | 0                                      | 0                                      | 0                                                  | 0            | 0                     | 0    |
| <i>AL132671.</i> | 0                       | 0                                      | 0                                      | 0                                                  | 0            | 1                     | 0    |
| 2                |                         |                                        |                                        |                                                    |              |                       |      |
| <i>ALB</i>       | 0                       | 0                                      | 0                                      | 0                                                  | 0            | 1                     | 0    |
| <i>ALDH1A3</i>   | 0                       | 0                                      | 0                                      | 0                                                  | 0            | 0                     | 1    |
| <i>ALDH2</i>     | 1                       | 0                                      | 0                                      | 0                                                  | 0            | 1                     | 0    |
| <i>ALDH3A1</i>   | 1                       | 0                                      | 0                                      | 0                                                  | 0            | 0                     | 0    |
| <i>ALDH6A1</i>   | 1                       | 0                                      | 0                                      | 0                                                  | 0            | 0                     | 0    |
| <i>ALDOA</i>     | 1                       | 0                                      | 0                                      | 0                                                  | 0            | 0                     | 0    |
| <i>ALG10</i>     | 1                       | 0                                      | 0                                      | 0                                                  | 0            | 0                     | 0    |
| <i>ALGS1</i>     | 0                       | 0                                      | 0                                      | 0                                                  | 0            | 0                     | 1    |
| <i>ALGS2</i>     | 0                       | 0                                      | 0                                      | 0                                                  | 0            | 0                     | 1    |
| <i>ALK</i>       | 0                       | 0                                      | 0                                      | 0                                                  | 0            | 1                     | 0    |
| <i>ALKAS</i>     | 0                       | 0                                      | 0                                      | 0                                                  | 0            | 0                     | 1    |
| <i>ALMS1</i>     | 1                       | 0                                      | 0                                      | 0                                                  | 0            | 0                     | 0    |

| Gene                   | Multi-omics integration | Gene-based result from AFGen 2017 GWAS | Gene-based result from AFGen 2018 GWAS | Meta-analysis of SNPs by two large AF GWAS in 2018 | GWAS catalog | Open Targets Platform | OMIM |
|------------------------|-------------------------|----------------------------------------|----------------------------------------|----------------------------------------------------|--------------|-----------------------|------|
| <i>ALOX15</i>          | 1                       | 0                                      | 0                                      | 0                                                  | 0            | 0                     | 0    |
| <i>ALPK1</i>           | 0                       | 0                                      | 0                                      | 1                                                  | 1            | 0                     | 0    |
| <i>ALS2CL</i>          | 1                       | 0                                      | 0                                      | 0                                                  | 0            | 0                     | 0    |
| <i>ALS5</i>            | 0                       | 0                                      | 0                                      | 0                                                  | 0            | 0                     | 1    |
| <i>ALX1</i>            | 0                       | 0                                      | 0                                      | 0                                                  | 0            | 0                     | 1    |
| <i>AMD1</i>            | 0                       | 0                                      | 0                                      | 0                                                  | 0            | 1                     | 0    |
| <i>AMER1</i>           | 0                       | 0                                      | 0                                      | 0                                                  | 0            | 0                     | 1    |
| <i>AMFR</i>            | 1                       | 0                                      | 0                                      | 0                                                  | 0            | 0                     | 0    |
| <i>AMH</i>             | 0                       | 0                                      | 0                                      | 0                                                  | 0            | 1                     | 0    |
| <i>ANAPC2</i>          | 1                       | 0                                      | 0                                      | 0                                                  | 0            | 0                     | 0    |
| <i>ANG</i>             | 0                       | 0                                      | 0                                      | 0                                                  | 0            | 1                     | 0    |
| <i>ANGPT4</i>          | 1                       | 0                                      | 0                                      | 0                                                  | 0            | 0                     | 0    |
| <i>ANK2</i>            | 0                       | 0                                      | 0                                      | 0                                                  | 0            | 1                     | 1    |
| <i>ANK3</i>            | 0                       | 0                                      | 0                                      | 0                                                  | 0            | 1                     | 0    |
| <i>ANKH</i>            | 1                       | 0                                      | 0                                      | 0                                                  | 0            | 0                     | 0    |
| <i>ANKHD1-EIF4EBP3</i> | 1                       | 0                                      | 0                                      | 0                                                  | 0            | 0                     | 0    |
| <i>ANKK1</i>           | 1                       | 0                                      | 0                                      | 0                                                  | 0            | 0                     | 0    |
| <i>ANKRD1</i>          | 1                       | 0                                      | 0                                      | 0                                                  | 0            | 0                     | 1    |
| <i>ANKRD16</i>         | 1                       | 0                                      | 0                                      | 0                                                  | 0            | 0                     | 0    |
| <i>ANKRD26</i>         | 0                       | 0                                      | 0                                      | 0                                                  | 1            | 0                     | 0    |
| <i>ANKRD29</i>         | 1                       | 0                                      | 0                                      | 0                                                  | 0            | 0                     | 0    |
| <i>ANKRD31</i>         | 0                       | 0                                      | 0                                      | 0                                                  | 1            | 0                     | 0    |
| <i>ANKRD44</i>         | 1                       | 0                                      | 0                                      | 0                                                  | 0            | 0                     | 0    |
| <i>ANKRD50</i>         | 1                       | 0                                      | 0                                      | 0                                                  | 0            | 0                     | 0    |
| <i>ANKRD52</i>         | 1                       | 0                                      | 0                                      | 0                                                  | 0            | 0                     | 0    |
| <i>ANKRD6</i>          | 0                       | 0                                      | 0                                      | 0                                                  | 0            | 1                     | 0    |
| <i>ANKS1A</i>          | 1                       | 0                                      | 0                                      | 0                                                  | 0            | 0                     | 0    |
| <i>ANKS3</i>           | 0                       | 0                                      | 0                                      | 0                                                  | 0            | 0                     | 1    |
| <i>ANO5</i>            | 1                       | 0                                      | 0                                      | 0                                                  | 0            | 0                     | 0    |
| <i>ANP32E</i>          | 1                       | 0                                      | 0                                      | 0                                                  | 0            | 0                     | 0    |
| <i>ANPEP</i>           | 0                       | 0                                      | 0                                      | 0                                                  | 0            | 1                     | 0    |
| <i>ANXA13</i>          | 1                       | 0                                      | 0                                      | 0                                                  | 0            | 0                     | 0    |
| <i>ANXA2</i>           | 1                       | 0                                      | 0                                      | 0                                                  | 0            | 0                     | 0    |
| <i>ANXA4</i>           | 1                       | 1                                      | 1                                      | 0                                                  | 1            | 1                     | 0    |
| <i>ANXA5</i>           | 1                       | 0                                      | 0                                      | 0                                                  | 0            | 1                     | 0    |
| <i>ANXA6</i>           | 0                       | 0                                      | 0                                      | 0                                                  | 0            | 1                     | 0    |
| <i>ANXA7</i>           | 1                       | 0                                      | 0                                      | 0                                                  | 0            | 1                     | 0    |
| <i>ANXA9</i>           | 0                       | 0                                      | 0                                      | 0                                                  | 0            | 1                     | 0    |
| <i>AOC2</i>            | 0                       | 0                                      | 0                                      | 0                                                  | 0            | 1                     | 0    |
| <i>AOS1</i>            | 0                       | 0                                      | 0                                      | 0                                                  | 0            | 0                     | 1    |
| <i>AOS4</i>            | 0                       | 0                                      | 0                                      | 0                                                  | 0            | 0                     | 1    |
| <i>AOS5</i>            | 0                       | 0                                      | 0                                      | 0                                                  | 0            | 0                     | 1    |
| <i>APIAR</i>           | 1                       | 0                                      | 0                                      | 0                                                  | 0            | 0                     | 0    |

| Gene                       | Multi-omics integration | Gene-based result from AFGen 2017 GWAS | Gene-based result from AFGen 2018 GWAS | Meta-analysis of SNPs by two large AF GWAS in 2018 | GWAS catalog | Open Targets Platform | OMIM |
|----------------------------|-------------------------|----------------------------------------|----------------------------------------|----------------------------------------------------|--------------|-----------------------|------|
| <i>AP3B1</i>               | 1                       | 0                                      | 0                                      | 0                                                  | 0            | 0                     | 0    |
| <i>APBB3</i>               | 1                       | 0                                      | 0                                      | 0                                                  | 0            | 0                     | 0    |
| <i>APC</i>                 | 1                       | 0                                      | 0                                      | 0                                                  | 0            | 0                     | 0    |
| <i>APEX1</i>               | 0                       | 0                                      | 0                                      | 0                                                  | 0            | 1                     | 0    |
| <i>APH1A</i>               | 1                       | 0                                      | 0                                      | 0                                                  | 0            | 0                     | 0    |
| <i>APLN</i>                | 0                       | 0                                      | 0                                      | 0                                                  | 0            | 1                     | 0    |
| <i>APLNR</i>               | 0                       | 0                                      | 0                                      | 0                                                  | 0            | 1                     | 0    |
| <i>APOA1</i>               | 0                       | 0                                      | 0                                      | 0                                                  | 0            | 1                     | 0    |
| <i>APOB</i>                | 0                       | 0                                      | 0                                      | 0                                                  | 1            | 1                     | 0    |
| <i>APOBEC2</i>             | 1                       | 0                                      | 0                                      | 0                                                  | 0            | 0                     | 0    |
| <i>APOC1</i>               | 0                       | 0                                      | 0                                      | 0                                                  | 1            | 1                     | 0    |
| <i>APOC1P1</i>             | 0                       | 0                                      | 0                                      | 0                                                  | 1            | 0                     | 0    |
| <i>APOE</i>                | 0                       | 0                                      | 0                                      | 0                                                  | 0            | 1                     | 0    |
| <i>APOLD1</i>              | 1                       | 0                                      | 0                                      | 0                                                  | 0            | 0                     | 0    |
| <i>APP</i>                 | 1                       | 0                                      | 0                                      | 0                                                  | 0            | 1                     | 0    |
| <i>APPL1</i>               | 1                       | 0                                      | 0                                      | 0                                                  | 0            | 0                     | 0    |
| <i>APUG</i>                | 0                       | 0                                      | 0                                      | 0                                                  | 0            | 0                     | 1    |
| <i>AQP2</i>                | 0                       | 0                                      | 0                                      | 0                                                  | 0            | 0                     | 1    |
| <i>AQP4</i>                | 0                       | 0                                      | 0                                      | 0                                                  | 0            | 1                     | 0    |
| <i>AQP5</i>                | 1                       | 0                                      | 0                                      | 0                                                  | 0            | 0                     | 0    |
| <i>ARCL2C</i>              | 0                       | 0                                      | 0                                      | 0                                                  | 0            | 0                     | 1    |
| <i>ARCL2D</i>              | 0                       | 0                                      | 0                                      | 0                                                  | 0            | 0                     | 1    |
| <i>ARCL3A</i>              | 0                       | 0                                      | 0                                      | 0                                                  | 0            | 0                     | 1    |
| <i>ARCS1</i>               | 0                       | 0                                      | 0                                      | 0                                                  | 0            | 0                     | 1    |
| <i>ARCS2</i>               | 0                       | 0                                      | 0                                      | 0                                                  | 0            | 0                     | 1    |
| <i>ARF1</i>                | 1                       | 0                                      | 0                                      | 0                                                  | 0            | 0                     | 0    |
| <i>ARF4</i>                | 1                       | 0                                      | 0                                      | 0                                                  | 0            | 0                     | 0    |
| <i>ARFIP1</i>              | 1                       | 0                                      | 0                                      | 0                                                  | 0            | 0                     | 0    |
| <i>ARHGAP1</i><br><i>0</i> | 1                       | 0                                      | 1                                      | 1                                                  | 1            | 1                     | 0    |
| <i>ARHGAP1</i><br><i>2</i> | 1                       | 0                                      | 0                                      | 0                                                  | 0            | 0                     | 0    |
| <i>ARHGAP1</i><br><i>9</i> | 1                       | 0                                      | 0                                      | 0                                                  | 0            | 0                     | 0    |
| <i>ARHGAP2</i><br><i>2</i> | 0                       | 0                                      | 0                                      | 0                                                  | 0            | 1                     | 0    |
| <i>ARHGAP2</i><br><i>4</i> | 1                       | 0                                      | 0                                      | 0                                                  | 0            | 0                     | 0    |
| <i>ARHGAP2</i><br><i>6</i> | 1                       | 0                                      | 0                                      | 0                                                  | 1            | 0                     | 0    |
| <i>ARHGAP3</i><br><i>1</i> | 0                       | 0                                      | 0                                      | 0                                                  | 0            | 0                     | 1    |
| <i>ARHGEF2</i>             | 1                       | 0                                      | 0                                      | 0                                                  | 0            | 0                     | 0    |
| <i>ARL10</i>               | 1                       | 0                                      | 0                                      | 0                                                  | 0            | 0                     | 0    |
| <i>ARL5B</i>               | 0                       | 0                                      | 0                                      | 0                                                  | 1            | 1                     | 0    |
| <i>ARL6IP1</i>             | 1                       | 0                                      | 0                                      | 0                                                  | 0            | 0                     | 0    |

| Gene           | Multi-omics integration | Gene-based result from AFGen 2017 GWAS | Gene-based result from AFGen 2018 GWAS | Meta-analysis of SNPs by two large AF GWAS in 2018 | GWAS catalog | Open Targets Platform | OMIM |
|----------------|-------------------------|----------------------------------------|----------------------------------------|----------------------------------------------------|--------------|-----------------------|------|
| <i>ARL6IP5</i> | 1                       | 0                                      | 0                                      | 0                                                  | 0            | 0                     | 0    |
| <i>ARMH3</i>   | 0                       | 0                                      | 0                                      | 0                                                  | 0            | 1                     | 0    |
| <i>ARNT2</i>   | 1                       | 0                                      | 0                                      | 1                                                  | 1            | 1                     | 0    |
| <i>ARNTL</i>   | 1                       | 0                                      | 0                                      | 0                                                  | 0            | 0                     | 0    |
| <i>ARNTL2</i>  | 1                       | 0                                      | 0                                      | 0                                                  | 0            | 0                     | 0    |
| <i>ARRB2</i>   | 1                       | 0                                      | 0                                      | 0                                                  | 0            | 0                     | 0    |
| <i>ARRDC1</i>  | 1                       | 0                                      | 0                                      | 0                                                  | 0            | 0                     | 0    |
| <i>ARRDC4</i>  | 1                       | 0                                      | 0                                      | 0                                                  | 0            | 0                     | 0    |
| <i>ARS</i>     | 0                       | 0                                      | 0                                      | 0                                                  | 0            | 0                     | 1    |
| <i>ARSA</i>    | 0                       | 0                                      | 0                                      | 0                                                  | 0            | 1                     | 0    |
| <i>ART3</i>    | 1                       | 0                                      | 0                                      | 0                                                  | 0            | 0                     | 0    |
| <i>ARVD1</i>   | 0                       | 0                                      | 0                                      | 0                                                  | 0            | 0                     | 1    |
| <i>ARVD8</i>   | 0                       | 0                                      | 0                                      | 0                                                  | 0            | 0                     | 1    |
| <i>AS3MT</i>   | 1                       | 0                                      | 0                                      | 0                                                  | 0            | 0                     | 0    |
| <i>ASAH1</i>   | 1                       | 0                                      | 1                                      | 1                                                  | 1            | 1                     | 0    |
| <i>ASAP1</i>   | 1                       | 0                                      | 0                                      | 0                                                  | 0            | 0                     | 0    |
| <i>ASB8</i>    | 1                       | 0                                      | 0                                      | 0                                                  | 0            | 0                     | 0    |
| <i>ASCL2</i>   | 1                       | 0                                      | 0                                      | 0                                                  | 0            | 0                     | 0    |
| <i>ASD1</i>    | 0                       | 0                                      | 0                                      | 0                                                  | 0            | 0                     | 1    |
| <i>ASD2</i>    | 0                       | 0                                      | 0                                      | 0                                                  | 0            | 0                     | 1    |
| <i>ASD3</i>    | 0                       | 0                                      | 0                                      | 0                                                  | 0            | 0                     | 1    |
| <i>ASD4</i>    | 0                       | 0                                      | 0                                      | 0                                                  | 0            | 0                     | 1    |
| <i>ASD5</i>    | 0                       | 0                                      | 0                                      | 0                                                  | 0            | 0                     | 1    |
| <i>ASD6</i>    | 0                       | 0                                      | 0                                      | 0                                                  | 0            | 0                     | 1    |
| <i>ASD7</i>    | 0                       | 0                                      | 0                                      | 0                                                  | 0            | 0                     | 1    |
| <i>ASD8</i>    | 0                       | 0                                      | 0                                      | 0                                                  | 0            | 0                     | 1    |
| <i>ASD9</i>    | 0                       | 0                                      | 0                                      | 0                                                  | 0            | 0                     | 1    |
| <i>ASGR1</i>   | 0                       | 0                                      | 0                                      | 0                                                  | 0            | 1                     | 0    |
| <i>ASGR2</i>   | 1                       | 0                                      | 0                                      | 0                                                  | 0            | 0                     | 0    |
| <i>ASH1L</i>   | 1                       | 0                                      | 0                                      | 0                                                  | 0            | 0                     | 0    |
| <i>ASPH</i>    | 1                       | 0                                      | 0                                      | 0                                                  | 0            | 0                     | 0    |
| <i>ASPRV1</i>  | 1                       | 1                                      | 1                                      | 0                                                  | 0            | 0                     | 0    |
| <i>ASTN2</i>   | 0                       | 0                                      | 0                                      | 0                                                  | 0            | 1                     | 0    |
| <i>ASXL2</i>   | 1                       | 0                                      | 0                                      | 0                                                  | 0            | 0                     | 0    |
| <i>ATAD2</i>   | 1                       | 0                                      | 0                                      | 0                                                  | 0            | 0                     | 0    |
| <i>ATE1</i>    | 0                       | 0                                      | 0                                      | 0                                                  | 0            | 0                     | 1    |
| <i>ATF3</i>    | 0                       | 0                                      | 0                                      | 0                                                  | 0            | 1                     | 0    |
| <i>ATF4</i>    | 0                       | 0                                      | 0                                      | 0                                                  | 0            | 1                     | 0    |
| <i>ATFB1</i>   | 0                       | 0                                      | 0                                      | 0                                                  | 0            | 0                     | 1    |
| <i>ATFB10</i>  | 0                       | 0                                      | 0                                      | 0                                                  | 0            | 0                     | 1    |
| <i>ATFB11</i>  | 0                       | 0                                      | 0                                      | 0                                                  | 0            | 0                     | 1    |
| <i>ATFB12</i>  | 0                       | 0                                      | 0                                      | 0                                                  | 0            | 0                     | 1    |
| <i>ATFB13</i>  | 0                       | 0                                      | 0                                      | 0                                                  | 0            | 0                     | 1    |
| <i>ATFB14</i>  | 0                       | 0                                      | 0                                      | 0                                                  | 0            | 0                     | 1    |

| Gene            | Multi-omics integration | Gene-based result from AFGen 2017 GWAS | Gene-based result from AFGen 2018 GWAS | Meta-analysis of SNPs by two large AF GWAS in 2018 | GWAS catalog | Open Targets Platform | OMIM |
|-----------------|-------------------------|----------------------------------------|----------------------------------------|----------------------------------------------------|--------------|-----------------------|------|
| <i>ATFB15</i>   | 0                       | 0                                      | 0                                      | 0                                                  | 0            | 0                     | 1    |
| <i>ATFB18</i>   | 0                       | 0                                      | 0                                      | 0                                                  | 0            | 0                     | 1    |
| <i>ATFB2</i>    | 0                       | 0                                      | 0                                      | 0                                                  | 0            | 0                     | 1    |
| <i>ATFB3</i>    | 0                       | 0                                      | 0                                      | 0                                                  | 0            | 0                     | 1    |
| <i>ATFB4</i>    | 0                       | 0                                      | 0                                      | 0                                                  | 0            | 0                     | 1    |
| <i>ATFB5</i>    | 0                       | 0                                      | 0                                      | 0                                                  | 0            | 0                     | 1    |
| <i>ATFB6</i>    | 0                       | 0                                      | 0                                      | 0                                                  | 0            | 0                     | 1    |
| <i>ATFB7</i>    | 0                       | 0                                      | 0                                      | 0                                                  | 0            | 0                     | 1    |
| <i>ATFB8</i>    | 0                       | 0                                      | 0                                      | 0                                                  | 0            | 0                     | 1    |
| <i>ATFB9</i>    | 0                       | 0                                      | 0                                      | 0                                                  | 0            | 0                     | 1    |
| <i>ATG5</i>     | 0                       | 0                                      | 0                                      | 0                                                  | 0            | 1                     | 0    |
| <i>ATG9B</i>    | 1                       | 0                                      | 0                                      | 0                                                  | 0            | 0                     | 0    |
| <i>ATL3</i>     | 1                       | 0                                      | 0                                      | 0                                                  | 0            | 0                     | 0    |
| <i>ATM</i>      | 0                       | 0                                      | 0                                      | 0                                                  | 0            | 1                     | 0    |
| <i>ATP13A2</i>  | 0                       | 0                                      | 0                                      | 0                                                  | 0            | 1                     | 0    |
| <i>ATP13A5</i>  | 1                       | 0                                      | 0                                      | 0                                                  | 0            | 0                     | 0    |
| <i>ATP1A1</i>   | 0                       | 0                                      | 0                                      | 0                                                  | 0            | 1                     | 0    |
| <i>ATP1A2</i>   | 0                       | 0                                      | 0                                      | 0                                                  | 0            | 1                     | 0    |
| <i>ATP1A3</i>   | 1                       | 0                                      | 0                                      | 0                                                  | 0            | 1                     | 0    |
| <i>ATP1A4</i>   | 0                       | 0                                      | 0                                      | 0                                                  | 0            | 1                     | 0    |
| <i>ATP1B1</i>   | 0                       | 0                                      | 0                                      | 0                                                  | 0            | 1                     | 0    |
| <i>ATP1B2</i>   | 1                       | 0                                      | 0                                      | 0                                                  | 0            | 1                     | 0    |
| <i>ATP1B3</i>   | 0                       | 0                                      | 0                                      | 0                                                  | 0            | 1                     | 0    |
| <i>ATP1B4</i>   | 0                       | 0                                      | 0                                      | 0                                                  | 0            | 1                     | 0    |
| <i>ATP2A2</i>   | 0                       | 0                                      | 0                                      | 0                                                  | 0            | 1                     | 0    |
| <i>ATP2B1</i>   | 1                       | 0                                      | 0                                      | 0                                                  | 1            | 1                     | 0    |
| <i>ATP2B2</i>   | 0                       | 0                                      | 0                                      | 0                                                  | 0            | 0                     | 1    |
| <i>ATP4A</i>    | 0                       | 0                                      | 0                                      | 0                                                  | 0            | 1                     | 0    |
| <i>ATP4B</i>    | 0                       | 0                                      | 0                                      | 0                                                  | 0            | 1                     | 0    |
| <i>ATP6AP2</i>  | 0                       | 0                                      | 0                                      | 0                                                  | 0            | 1                     | 0    |
| <i>ATP6VOA1</i> | 1                       | 0                                      | 0                                      | 0                                                  | 0            | 0                     | 0    |
| <i>ATP6V1F</i>  | 1                       | 0                                      | 0                                      | 0                                                  | 0            | 0                     | 0    |
| <i>ATP7A</i>    | 0                       | 0                                      | 0                                      | 0                                                  | 0            | 1                     | 0    |
| <i>ATP7B</i>    | 0                       | 0                                      | 0                                      | 0                                                  | 0            | 1                     | 0    |
| <i>ATRST1</i>   | 0                       | 0                                      | 0                                      | 0                                                  | 0            | 0                     | 1    |
| <i>ATRST2</i>   | 0                       | 0                                      | 0                                      | 0                                                  | 0            | 0                     | 1    |
| <i>ATXN1</i>    | 1                       | 0                                      | 1                                      | 1                                                  | 1            | 1                     | 0    |
| <i>ATXN3</i>    | 1                       | 0                                      | 0                                      | 0                                                  | 0            | 0                     | 0    |
| <i>AVSD</i>     | 0                       | 0                                      | 0                                      | 0                                                  | 0            | 0                     | 1    |
| <i>AVSD3</i>    | 0                       | 0                                      | 0                                      | 0                                                  | 0            | 0                     | 1    |
| <i>AVSD4</i>    | 0                       | 0                                      | 0                                      | 0                                                  | 0            | 0                     | 1    |
| <i>AVSD5</i>    | 0                       | 0                                      | 0                                      | 0                                                  | 0            | 0                     | 1    |
| <i>AXIN1</i>    | 1                       | 0                                      | 0                                      | 0                                                  | 0            | 0                     | 0    |



| Gene           | Multi-omics integration | Gene-based result from AFGen 2017 GWAS | Gene-based result from AFGen 2018 GWAS | Meta-analysis of SNPs by two large AF GWAS in 2018 | GWAS catalog | Open Targets Platform | OMIM |
|----------------|-------------------------|----------------------------------------|----------------------------------------|----------------------------------------------------|--------------|-----------------------|------|
| <i>AZI2</i>    | 1                       | 0                                      | 0                                      | 0                                                  | 0            | 0                     | 0    |
| <i>B2M</i>     | 0                       | 0                                      | 0                                      | 0                                                  | 0            | 1                     | 0    |
| <i>B3GNT2</i>  | 1                       | 0                                      | 0                                      | 0                                                  | 0            | 0                     | 0    |
| <i>B3GNT8</i>  | 1                       | 0                                      | 0                                      | 0                                                  | 0            | 0                     | 0    |
| <i>B3GNT9</i>  | 1                       | 0                                      | 0                                      | 0                                                  | 0            | 0                     | 0    |
| <i>B3GNTL1</i> | 1                       | 0                                      | 0                                      | 0                                                  | 0            | 0                     | 0    |
| <i>B9D2</i>    | 1                       | 0                                      | 0                                      | 0                                                  | 0            | 0                     | 0    |
| <i>BAK1</i>    | 0                       | 0                                      | 0                                      | 0                                                  | 0            | 1                     | 0    |
| <i>BAMBI</i>   | 1                       | 0                                      | 0                                      | 0                                                  | 0            | 0                     | 0    |
| <i>BANF1</i>   | 0                       | 0                                      | 0                                      | 0                                                  | 0            | 1                     | 0    |
| <i>BANK1</i>   | 0                       | 0                                      | 0                                      | 0                                                  | 0            | 1                     | 0    |
| <i>BARTS3</i>  | 0                       | 0                                      | 0                                      | 0                                                  | 0            | 0                     | 1    |
| <i>BARX2</i>   | 1                       | 0                                      | 0                                      | 0                                                  | 0            | 0                     | 0    |
| <i>BAX</i>     | 0                       | 0                                      | 0                                      | 0                                                  | 0            | 1                     | 0    |
| <i>BAZ1A</i>   | 1                       | 0                                      | 1                                      | 0                                                  | 0            | 0                     | 0    |
| <i>BAZ1B</i>   | 0                       | 0                                      | 0                                      | 0                                                  | 1            | 0                     | 0    |
| <i>BAZ2A</i>   | 1                       | 0                                      | 1                                      | 0                                                  | 0            | 0                     | 0    |
| <i>BBC3</i>    | 1                       | 0                                      | 0                                      | 0                                                  | 0            | 0                     | 0    |
| <i>BBIS</i>    | 0                       | 0                                      | 0                                      | 0                                                  | 0            | 0                     | 1    |
| <i>BBS2</i>    | 0                       | 0                                      | 0                                      | 0                                                  | 0            | 0                     | 1    |
| <i>BBS7</i>    | 1                       | 0                                      | 0                                      | 0                                                  | 0            | 0                     | 0    |
| <i>BBS9</i>    | 1                       | 0                                      | 0                                      | 0                                                  | 0            | 0                     | 0    |
| <i>BCAP29</i>  | 1                       | 0                                      | 1                                      | 0                                                  | 0            | 0                     | 0    |
| <i>BCAT1</i>   | 1                       | 0                                      | 0                                      | 0                                                  | 0            | 0                     | 0    |
| <i>BCC1</i>    | 0                       | 0                                      | 0                                      | 0                                                  | 0            | 0                     | 1    |
| <i>BCHE</i>    | 1                       | 0                                      | 0                                      | 0                                                  | 0            | 1                     | 0    |
| <i>BCL11A</i>  | 1                       | 0                                      | 0                                      | 0                                                  | 0            | 0                     | 0    |
| <i>BCL2</i>    | 1                       | 0                                      | 0                                      | 0                                                  | 0            | 1                     | 0    |
| <i>BCL2A1</i>  | 0                       | 0                                      | 0                                      | 0                                                  | 0            | 1                     | 0    |
| <i>BCL2L11</i> | 1                       | 0                                      | 0                                      | 0                                                  | 0            | 0                     | 0    |
| <i>BCL2L2</i>  | 1                       | 0                                      | 0                                      | 0                                                  | 0            | 0                     | 0    |
| <i>BCL3</i>    | 0                       | 0                                      | 0                                      | 0                                                  | 1            | 1                     | 0    |
| <i>BCL9</i>    | 1                       | 0                                      | 0                                      | 0                                                  | 0            | 0                     | 0    |
| <i>BCO1</i>    | 0                       | 0                                      | 0                                      | 0                                                  | 0            | 1                     | 0    |
| <i>BCO2</i>    | 1                       | 0                                      | 0                                      | 0                                                  | 0            | 0                     | 0    |
| <i>BCOR</i>    | 0                       | 0                                      | 0                                      | 0                                                  | 0            | 0                     | 1    |
| <i>BDH2</i>    | 1                       | 0                                      | 0                                      | 0                                                  | 0            | 0                     | 0    |
| <i>BDNF</i>    | 0                       | 0                                      | 0                                      | 0                                                  | 0            | 1                     | 0    |
| <i>BEND7</i>   | 1                       | 0                                      | 0                                      | 0                                                  | 0            | 0                     | 0    |
| <i>BEST3</i>   | 0                       | 0                                      | 1                                      | 1                                                  | 1            | 1                     | 0    |
| <i>BGLAP</i>   | 0                       | 0                                      | 0                                      | 0                                                  | 0            | 1                     | 0    |
| <i>BHLHE41</i> | 1                       | 0                                      | 0                                      | 0                                                  | 0            | 0                     | 0    |
| <i>BID</i>     | 0                       | 0                                      | 0                                      | 0                                                  | 0            | 1                     | 0    |
| <i>BLK</i>     | 1                       | 0                                      | 0                                      | 0                                                  | 0            | 0                     | 0    |

| Gene            | Multi-omics integration | Gene-based result from AFGen 2017 GWAS | Gene-based result from AFGen 2018 GWAS | Meta-analysis of SNPs by two large AF GWAS in 2018 | GWAS catalog | Open Targets Platform | OMIM |
|-----------------|-------------------------|----------------------------------------|----------------------------------------|----------------------------------------------------|--------------|-----------------------|------|
| <i>BLOC1S2</i>  | 1                       | 0                                      | 0                                      | 0                                                  | 0            | 1                     | 0    |
| <i>BMKS</i>     | 0                       | 0                                      | 0                                      | 0                                                  | 0            | 0                     | 1    |
| <i>BMP10</i>    | 0                       | 0                                      | 0                                      | 0                                                  | 0            | 1                     | 1    |
| <i>BMP2</i>     | 0                       | 0                                      | 0                                      | 1                                                  | 0            | 1                     | 1    |
| <i>BMP7</i>     | 0                       | 0                                      | 0                                      | 0                                                  | 0            | 1                     | 0    |
| <i>BMP8A</i>    | 1                       | 0                                      | 0                                      | 0                                                  | 0            | 0                     | 0    |
| <i>BMPR1B</i>   | 1                       | 0                                      | 0                                      | 0                                                  | 0            | 0                     | 0    |
| <i>BNC2</i>     | 1                       | 0                                      | 0                                      | 0                                                  | 0            | 0                     | 0    |
| <i>BNIP1</i>    | 1                       | 0                                      | 1                                      | 0                                                  | 0            | 0                     | 0    |
| <i>BOLA1</i>    | 1                       | 0                                      | 0                                      | 0                                                  | 0            | 0                     | 0    |
| <i>BOLL</i>     | 1                       | 0                                      | 0                                      | 0                                                  | 0            | 0                     | 0    |
| <i>BOPS</i>     | 0                       | 0                                      | 0                                      | 0                                                  | 0            | 0                     | 1    |
| <i>BOR1</i>     | 0                       | 0                                      | 0                                      | 0                                                  | 0            | 0                     | 1    |
| <i>BRAP</i>     | 0                       | 0                                      | 0                                      | 0                                                  | 0            | 1                     | 0    |
| <i>BRD1</i>     | 0                       | 0                                      | 0                                      | 0                                                  | 0            | 1                     | 0    |
| <i>BRD3</i>     | 1                       | 0                                      | 0                                      | 0                                                  | 0            | 0                     | 0    |
| <i>BRD8</i>     | 1                       | 0                                      | 1                                      | 0                                                  | 0            | 0                     | 0    |
| <i>BRD9</i>     | 1                       | 0                                      | 0                                      | 0                                                  | 0            | 0                     | 0    |
| <i>BRGDA1</i>   | 0                       | 0                                      | 0                                      | 0                                                  | 0            | 0                     | 1    |
| <i>BRGDA2</i>   | 0                       | 0                                      | 0                                      | 0                                                  | 0            | 0                     | 1    |
| <i>BRGDA3</i>   | 0                       | 0                                      | 0                                      | 0                                                  | 0            | 0                     | 1    |
| <i>BRGDA4</i>   | 0                       | 0                                      | 0                                      | 0                                                  | 0            | 0                     | 1    |
| <i>BRGDA5</i>   | 0                       | 0                                      | 0                                      | 0                                                  | 0            | 0                     | 1    |
| <i>BRGDA7</i>   | 0                       | 0                                      | 0                                      | 0                                                  | 0            | 0                     | 1    |
| <i>BRGDA8</i>   | 0                       | 0                                      | 0                                      | 0                                                  | 0            | 0                     | 1    |
| <i>BRINP3</i>   | 0                       | 0                                      | 0                                      | 0                                                  | 0            | 1                     | 0    |
| <i>BRMS1L</i>   | 1                       | 0                                      | 0                                      | 0                                                  | 0            | 0                     | 0    |
| <i>BRWD1</i>    | 1                       | 0                                      | 0                                      | 0                                                  | 0            | 0                     | 0    |
| <i>BRWS1</i>    | 0                       | 0                                      | 0                                      | 0                                                  | 0            | 0                     | 1    |
| <i>BSG</i>      | 0                       | 0                                      | 0                                      | 0                                                  | 0            | 1                     | 0    |
| <i>BSPRY</i>    | 1                       | 0                                      | 0                                      | 0                                                  | 0            | 0                     | 0    |
| <i>BSX</i>      | 0                       | 0                                      | 0                                      | 0                                                  | 1            | 1                     | 0    |
| <i>BTC</i>      | 1                       | 0                                      | 0                                      | 0                                                  | 0            | 0                     | 0    |
| <i>BTG1</i>     | 1                       | 0                                      | 0                                      | 0                                                  | 0            | 0                     | 0    |
| <i>BTK</i>      | 0                       | 0                                      | 0                                      | 0                                                  | 0            | 1                     | 0    |
| <i>BTRC</i>     | 1                       | 0                                      | 0                                      | 0                                                  | 0            | 0                     | 0    |
| <i>BVVL1S1</i>  | 0                       | 0                                      | 0                                      | 0                                                  | 0            | 0                     | 1    |
| <i>BVVL1S2</i>  | 0                       | 0                                      | 0                                      | 0                                                  | 0            | 0                     | 1    |
| <i>C10orf11</i> | 0                       | 0                                      | 0                                      | 1                                                  | 1            | 0                     | 0    |
| <i>C10orf55</i> | 1                       | 0                                      | 1                                      | 0                                                  | 0            | 0                     | 0    |
| <i>C10orf71</i> | 1                       | 0                                      | 0                                      | 0                                                  | 0            | 0                     | 0    |
| <i>C10orf76</i> | 0                       | 0                                      | 0                                      | 0                                                  | 1            | 0                     | 0    |
| <i>C10orf95</i> | 1                       | 0                                      | 0                                      | 0                                                  | 0            | 0                     | 0    |
| <i>C11orf21</i> | 1                       | 0                                      | 0                                      | 0                                                  | 0            | 0                     | 0    |

| Gene            | Multi-omics integration | Gene-based result from AFGen 2017 GWAS | Gene-based result from AFGen 2018 GWAS | Meta-analysis of SNPs by two large AF GWAS in 2018 | GWAS catalog | Open Targets Platform | OMIM |
|-----------------|-------------------------|----------------------------------------|----------------------------------------|----------------------------------------------------|--------------|-----------------------|------|
| <i>C11orf45</i> | 1                       | 0                                      | 1                                      | 0                                                  | 0            | 0                     | 0    |
| <i>C11orf52</i> | 1                       | 0                                      | 0                                      | 0                                                  | 0            | 0                     | 0    |
| <i>C12orf76</i> | 1                       | 0                                      | 0                                      | 0                                                  | 0            | 0                     | 0    |
| <i>C17orf99</i> | 1                       | 0                                      | 0                                      | 0                                                  | 0            | 0                     | 0    |
| <i>C19orf18</i> | 1                       | 0                                      | 0                                      | 0                                                  | 0            | 0                     | 0    |
| <i>C19orf54</i> | 1                       | 0                                      | 0                                      | 0                                                  | 0            | 0                     | 0    |
| <i>C1orf116</i> | 1                       | 0                                      | 0                                      | 0                                                  | 0            | 0                     | 0    |
| <i>C1orf185</i> | 0                       | 0                                      | 0                                      | 0                                                  | 1            | 1                     | 0    |
| <i>C1orf61</i>  | 1                       | 0                                      | 0                                      | 0                                                  | 0            | 0                     | 0    |
| <i>C1QTNF7</i>  | 0                       | 0                                      | 0                                      | 0                                                  | 0            | 1                     | 0    |
| <i>C2</i>       | 1                       | 0                                      | 0                                      | 0                                                  | 0            | 0                     | 0    |
| <i>C21orf2</i>  | 1                       | 0                                      | 0                                      | 0                                                  | 0            | 0                     | 0    |
| <i>C21orf62</i> | 1                       | 0                                      | 0                                      | 0                                                  | 0            | 0                     | 0    |
| <i>C22orf15</i> | 1                       | 0                                      | 0                                      | 0                                                  | 0            | 0                     | 0    |
| <i>C2CD4A</i>   | 1                       | 0                                      | 0                                      | 0                                                  | 0            | 0                     | 0    |
| <i>C2orf40</i>  | 1                       | 0                                      | 0                                      | 0                                                  | 0            | 0                     | 0    |
| <i>C2orf42</i>  | 1                       | 0                                      | 0                                      | 0                                                  | 0            | 0                     | 0    |
| <i>C2orf69</i>  | 1                       | 0                                      | 1                                      | 0                                                  | 0            | 0                     | 0    |
| <i>C2orf88</i>  | 1                       | 0                                      | 0                                      | 0                                                  | 0            | 0                     | 0    |
| <i>C3orf52</i>  | 1                       | 0                                      | 1                                      | 0                                                  | 0            | 0                     | 0    |
| <i>C4B</i>      | 1                       | 0                                      | 0                                      | 0                                                  | 0            | 0                     | 0    |
| <i>C4BPA</i>    | 1                       | 0                                      | 0                                      | 0                                                  | 0            | 0                     | 0    |
| <i>C5orf24</i>  | 1                       | 0                                      | 0                                      | 0                                                  | 0            | 0                     | 0    |
| <i>C5orf30</i>  | 1                       | 0                                      | 0                                      | 0                                                  | 0            | 0                     | 0    |
| <i>C5orf47</i>  | 0                       | 0                                      | 0                                      | 0                                                  | 1            | 0                     | 0    |
| <i>C6orf106</i> | 1                       | 0                                      | 0                                      | 0                                                  | 0            | 0                     | 0    |
| <i>C6orf15</i>  | 1                       | 0                                      | 0                                      | 0                                                  | 0            | 0                     | 0    |
| <i>C6orf48</i>  | 1                       | 0                                      | 0                                      | 0                                                  | 0            | 0                     | 0    |
| <i>C7orf31</i>  | 1                       | 0                                      | 0                                      | 0                                                  | 0            | 0                     | 0    |
| <i>C7orf50</i>  | 1                       | 0                                      | 0                                      | 0                                                  | 0            | 0                     | 0    |
| <i>C7orf61</i>  | 1                       | 0                                      | 0                                      | 0                                                  | 0            | 0                     | 0    |
| <i>C8orf44</i>  | 1                       | 0                                      | 0                                      | 0                                                  | 0            | 0                     | 0    |
| <i>C9orf3</i>   | 1                       | 0                                      | 1                                      | 1                                                  | 1            | 1                     | 0    |
| <i>C9orf40</i>  | 1                       | 0                                      | 0                                      | 0                                                  | 0            | 0                     | 0    |
| <i>C9orf72</i>  | 0                       | 0                                      | 0                                      | 0                                                  | 0            | 1                     | 0    |
| <i>C9orf84</i>  | 1                       | 0                                      | 0                                      | 0                                                  | 0            | 0                     | 0    |
| <i>CA1</i>      | 0                       | 0                                      | 0                                      | 0                                                  | 0            | 1                     | 0    |
| <i>CA12</i>     | 1                       | 0                                      | 0                                      | 0                                                  | 0            | 0                     | 0    |
| <i>CA14</i>     | 1                       | 0                                      | 0                                      | 0                                                  | 0            | 0                     | 0    |
| <i>CAAP1</i>    | 0                       | 0                                      | 0                                      | 0                                                  | 0            | 1                     | 0    |
| <i>CAB39</i>    | 1                       | 0                                      | 0                                      | 0                                                  | 0            | 0                     | 0    |
| <i>CABIN1</i>   | 0                       | 0                                      | 0                                      | 0                                                  | 0            | 1                     | 0    |
| <i>CACNA1C</i>  | 1                       | 0                                      | 0                                      | 0                                                  | 0            | 1                     | 1    |
| <i>CACNA1</i>   | 1                       | 0                                      | 0                                      | 0                                                  | 0            | 1                     | 0    |

| Gene           | Multi-omics integration | Gene-based result from AFGen 2017 GWAS | Gene-based result from AFGen 2018 GWAS | Meta-analysis of SNPs by two large AF GWAS in 2018 | GWAS catalog | Open Targets Platform | OMIM |
|----------------|-------------------------|----------------------------------------|----------------------------------------|----------------------------------------------------|--------------|-----------------------|------|
| <i>D</i>       |                         |                                        |                                        |                                                    |              |                       |      |
| <i>CACNA1F</i> | 0                       | 0                                      | 0                                      | 0                                                  | 0            | 1                     | 0    |
| <i>CACNA1S</i> | 0                       | 0                                      | 0                                      | 0                                                  | 0            | 1                     | 0    |
| <i>CACNB1</i>  | 1                       | 0                                      | 0                                      | 0                                                  | 0            | 0                     | 0    |
| <i>CACNB2</i>  | 0                       | 0                                      | 0                                      | 0                                                  | 0            | 1                     | 0    |
| <i>CACNB3</i>  | 1                       | 0                                      | 0                                      | 0                                                  | 0            | 0                     | 0    |
| <i>CADMI</i>   | 0                       | 0                                      | 0                                      | 0                                                  | 0            | 1                     | 0    |
| <i>CAGE1</i>   | 1                       | 0                                      | 0                                      | 0                                                  | 0            | 0                     | 0    |
| <i>CAID</i>    | 0                       | 0                                      | 0                                      | 0                                                  | 0            | 0                     | 1    |
| <i>CALCR</i>   | 0                       | 0                                      | 0                                      | 0                                                  | 0            | 1                     | 0    |
| <i>CALD1</i>   | 1                       | 0                                      | 0                                      | 0                                                  | 0            | 0                     | 0    |
| <i>CALHM1</i>  | 1                       | 0                                      | 0                                      | 0                                                  | 0            | 0                     | 0    |
| <i>CALHM2</i>  | 1                       | 0                                      | 0                                      | 0                                                  | 0            | 0                     | 0    |
| <i>CALHM3</i>  | 1                       | 0                                      | 1                                      | 0                                                  | 0            | 0                     | 0    |
| <i>CALM1</i>   | 0                       | 0                                      | 0                                      | 0                                                  | 0            | 0                     | 1    |
| <i>CALM2</i>   | 0                       | 0                                      | 0                                      | 0                                                  | 0            | 0                     | 1    |
| <i>CALM2P1</i> | 0                       | 0                                      | 0                                      | 0                                                  | 1            | 0                     | 0    |
| <i>CALN1</i>   | 1                       | 0                                      | 0                                      | 0                                                  | 0            | 0                     | 0    |
| <i>CALR</i>    | 1                       | 0                                      | 0                                      | 0                                                  | 0            | 1                     | 0    |
| <i>CALU</i>    | 1                       | 0                                      | 0                                      | 0                                                  | 0            | 0                     | 0    |
| <i>CAMK2A</i>  | 1                       | 0                                      | 0                                      | 0                                                  | 0            | 0                     | 0    |
| <i>CAMK2D</i>  | 1                       | 0                                      | 0                                      | 1                                                  | 1            | 1                     | 0    |
| <i>CAMK2G</i>  | 1                       | 0                                      | 1                                      | 0                                                  | 0            | 0                     | 0    |
| <i>CAND2</i>   | 0                       | 0                                      | 0                                      | 1                                                  | 1            | 1                     | 0    |
| <i>CAP2</i>    | 0                       | 0                                      | 0                                      | 0                                                  | 0            | 1                     | 0    |
| <i>CAPN12</i>  | 1                       | 0                                      | 0                                      | 0                                                  | 0            | 0                     | 0    |
| <i>CAPNS1</i>  | 1                       | 0                                      | 0                                      | 0                                                  | 0            | 0                     | 0    |
| <i>CAPRN2</i>  | 1                       | 0                                      | 0                                      | 0                                                  | 0            | 0                     | 0    |
| <i>CAPZB</i>   | 1                       | 0                                      | 0                                      | 0                                                  | 0            | 0                     | 0    |
| <i>CARD9</i>   | 1                       | 0                                      | 0                                      | 0                                                  | 0            | 0                     | 0    |
| <i>CARF</i>    | 0                       | 0                                      | 0                                      | 0                                                  | 0            | 1                     | 0    |
| <i>CASC15</i>  | 0                       | 0                                      | 0                                      | 0                                                  | 0            | 1                     | 0    |
| <i>CASC20</i>  | 0                       | 0                                      | 0                                      | 1                                                  | 1            | 0                     | 0    |
| <i>CASKIN1</i> | 1                       | 0                                      | 0                                      | 0                                                  | 0            | 0                     | 0    |
| <i>CASP3</i>   | 0                       | 0                                      | 0                                      | 0                                                  | 0            | 1                     | 0    |
| <i>CASP4</i>   | 1                       | 0                                      | 0                                      | 0                                                  | 0            | 0                     | 0    |
| <i>CASP8</i>   | 0                       | 0                                      | 0                                      | 0                                                  | 0            | 1                     | 0    |
| <i>CASP9</i>   | 0                       | 0                                      | 0                                      | 0                                                  | 0            | 1                     | 0    |
| <i>CASQ2</i>   | 1                       | 0                                      | 1                                      | 1                                                  | 1            | 1                     | 0    |
| <i>CASR</i>    | 1                       | 0                                      | 0                                      | 0                                                  | 0            | 0                     | 0    |
| <i>CAST</i>    | 0                       | 0                                      | 0                                      | 0                                                  | 0            | 1                     | 0    |
| <i>CASZI</i>   | 1                       | 0                                      | 0                                      | 1                                                  | 1            | 1                     | 0    |
| <i>CAT</i>     | 0                       | 0                                      | 0                                      | 0                                                  | 0            | 1                     | 0    |
| <i>CAVI</i>    | 1                       | 1                                      | 1                                      | 1                                                  | 1            | 1                     | 0    |

| Gene           | Multi-omics integration | Gene-based result from AFGen 2017 GWAS | Gene-based result from AFGen 2018 GWAS | Meta-analysis of SNPs by two large AF GWAS in 2018 | GWAS catalog | Open Targets Platform | OMIM |
|----------------|-------------------------|----------------------------------------|----------------------------------------|----------------------------------------------------|--------------|-----------------------|------|
| <i>CAV2</i>    | 1                       | 1                                      | 1                                      | 0                                                  | 1            | 1                     | 0    |
| <i>CAV3</i>    | 0                       | 0                                      | 0                                      | 0                                                  | 0            | 1                     | 0    |
| <i>CAVIN1</i>  | 0                       | 0                                      | 0                                      | 0                                                  | 0            | 0                     | 1    |
| <i>CAVIN4</i>  | 0                       | 0                                      | 0                                      | 0                                                  | 0            | 1                     | 1    |
| <i>CBFA2T3</i> | 1                       | 0                                      | 0                                      | 0                                                  | 0            | 0                     | 0    |
| <i>CBS</i>     | 0                       | 0                                      | 0                                      | 0                                                  | 0            | 1                     | 0    |
| <i>CBX5</i>    | 0                       | 0                                      | 0                                      | 0                                                  | 0            | 1                     | 0    |
| <i>CBY1</i>    | 0                       | 0                                      | 0                                      | 0                                                  | 0            | 1                     | 0    |
| <i>CCDC105</i> | 1                       | 0                                      | 0                                      | 0                                                  | 0            | 0                     | 0    |
| <i>CCDC117</i> | 1                       | 0                                      | 0                                      | 0                                                  | 0            | 0                     | 0    |
| <i>CCDC12</i>  | 1                       | 0                                      | 0                                      | 0                                                  | 0            | 0                     | 0    |
| <i>CCDC127</i> | 1                       | 0                                      | 0                                      | 0                                                  | 0            | 0                     | 0    |
| <i>CCDC136</i> | 1                       | 0                                      | 0                                      | 0                                                  | 0            | 0                     | 0    |
| <i>CCDC146</i> | 1                       | 0                                      | 0                                      | 0                                                  | 0            | 0                     | 0    |
| <i>CCDC15</i>  | 1                       | 0                                      | 0                                      | 0                                                  | 0            | 0                     | 0    |
| <i>CCDC151</i> | 1                       | 0                                      | 0                                      | 0                                                  | 0            | 0                     | 0    |
| <i>CCDC158</i> | 1                       | 0                                      | 0                                      | 0                                                  | 0            | 0                     | 0    |
| <i>CCDC170</i> | 0                       | 0                                      | 0                                      | 0                                                  | 0            | 1                     | 0    |
| <i>CCDC60</i>  | 1                       | 0                                      | 0                                      | 0                                                  | 0            | 0                     | 0    |
| <i>CCDC62</i>  | 1                       | 0                                      | 0                                      | 0                                                  | 0            | 0                     | 0    |
| <i>CCDC77</i>  | 1                       | 0                                      | 0                                      | 0                                                  | 0            | 0                     | 0    |
| <i>CCDC78</i>  | 1                       | 0                                      | 0                                      | 0                                                  | 0            | 0                     | 0    |
| <i>CCDC8</i>   | 1                       | 0                                      | 0                                      | 0                                                  | 0            | 0                     | 0    |
| <i>CCDC92</i>  | 1                       | 0                                      | 1                                      | 1                                                  | 1            | 0                     | 0    |
| <i>CCDD</i>    | 0                       | 0                                      | 0                                      | 0                                                  | 0            | 0                     | 1    |
| <i>CCHCR1</i>  | 1                       | 0                                      | 0                                      | 0                                                  | 0            | 0                     | 0    |
| <i>CCK</i>     | 1                       | 0                                      | 0                                      | 0                                                  | 0            | 0                     | 0    |
| <i>CCL1</i>    | 1                       | 0                                      | 0                                      | 0                                                  | 0            | 0                     | 0    |
| <i>CCL11</i>   | 0                       | 0                                      | 0                                      | 0                                                  | 0            | 1                     | 0    |
| <i>CCL16</i>   | 0                       | 0                                      | 0                                      | 0                                                  | 0            | 1                     | 0    |
| <i>CCL2</i>    | 0                       | 0                                      | 0                                      | 0                                                  | 0            | 1                     | 0    |
| <i>CCL21</i>   | 0                       | 0                                      | 0                                      | 0                                                  | 0            | 1                     | 0    |
| <i>CCL4</i>    | 0                       | 0                                      | 0                                      | 0                                                  | 0            | 1                     | 0    |
| <i>CCL5</i>    | 0                       | 0                                      | 0                                      | 0                                                  | 0            | 1                     | 0    |
| <i>CCMS</i>    | 0                       | 0                                      | 0                                      | 0                                                  | 0            | 0                     | 1    |
| <i>CCN1</i>    | 0                       | 0                                      | 0                                      | 0                                                  | 0            | 1                     | 0    |
| <i>CCN2</i>    | 0                       | 0                                      | 0                                      | 0                                                  | 0            | 1                     | 0    |
| <i>CCND1</i>   | 1                       | 0                                      | 0                                      | 0                                                  | 0            | 0                     | 0    |
| <i>CCR2</i>    | 0                       | 0                                      | 0                                      | 0                                                  | 0            | 1                     | 0    |
| <i>CCR4</i>    | 1                       | 0                                      | 0                                      | 0                                                  | 0            | 0                     | 0    |
| <i>CCRL2</i>   | 1                       | 0                                      | 0                                      | 0                                                  | 0            | 0                     | 0    |
| <i>CCS</i>     | 1                       | 0                                      | 0                                      | 0                                                  | 0            | 1                     | 0    |
| <i>CCT2</i>    | 0                       | 0                                      | 1                                      | 0                                                  | 0            | 0                     | 0    |
| <i>CD14</i>    | 1                       | 0                                      | 0                                      | 0                                                  | 0            | 1                     | 0    |

| Gene              | Multi-omics integration | Gene-based result from AFGen 2017 GWAS | Gene-based result from AFGen 2018 GWAS | Meta-analysis of SNPs by two large AF GWAS in 2018 | GWAS catalog | Open Targets Platform | OMIM |
|-------------------|-------------------------|----------------------------------------|----------------------------------------|----------------------------------------------------|--------------|-----------------------|------|
| <i>CD163</i>      | 0                       | 0                                      | 0                                      | 0                                                  | 0            | 1                     | 0    |
| <i>CD180</i>      | 1                       | 0                                      | 0                                      | 0                                                  | 0            | 0                     | 0    |
| <i>CD19</i>       | 1                       | 0                                      | 0                                      | 0                                                  | 0            | 0                     | 0    |
| <i>CD274</i>      | 0                       | 0                                      | 0                                      | 0                                                  | 0            | 1                     | 0    |
| <i>CD28</i>       | 0                       | 0                                      | 0                                      | 0                                                  | 0            | 1                     | 0    |
| <i>CD34</i>       | 1                       | 0                                      | 0                                      | 0                                                  | 0            | 1                     | 0    |
| <i>CD36</i>       | 1                       | 0                                      | 0                                      | 0                                                  | 0            | 1                     | 0    |
| <i>CD3G</i>       | 1                       | 0                                      | 0                                      | 0                                                  | 0            | 0                     | 0    |
| <i>CD4</i>        | 0                       | 0                                      | 0                                      | 0                                                  | 0            | 1                     | 0    |
| <i>CD40</i>       | 1                       | 0                                      | 0                                      | 0                                                  | 0            | 1                     | 0    |
| <i>CD40LG</i>     | 0                       | 0                                      | 0                                      | 0                                                  | 0            | 1                     | 0    |
| <i>CD6</i>        | 0                       | 0                                      | 0                                      | 0                                                  | 0            | 1                     | 0    |
| <i>CD63</i>       | 0                       | 0                                      | 0                                      | 0                                                  | 0            | 1                     | 0    |
| <i>CD68</i>       | 1                       | 0                                      | 1                                      | 0                                                  | 0            | 1                     | 0    |
| <i>CD82</i>       | 1                       | 0                                      | 0                                      | 0                                                  | 0            | 0                     | 0    |
| <i>CD8A</i>       | 1                       | 0                                      | 0                                      | 0                                                  | 0            | 0                     | 0    |
| <i>CDA</i>        | 1                       | 0                                      | 0                                      | 0                                                  | 0            | 0                     | 0    |
| <i>CDC14B</i>     | 1                       | 0                                      | 1                                      | 0                                                  | 0            | 0                     | 0    |
| <i>CDC23</i>      | 1                       | 0                                      | 1                                      | 0                                                  | 0            | 0                     | 0    |
| <i>CDC25C</i>     | 0                       | 0                                      | 1                                      | 0                                                  | 0            | 0                     | 0    |
| <i>CDC27</i>      | 1                       | 0                                      | 0                                      | 0                                                  | 0            | 0                     | 0    |
| <i>CDC42BP A</i>  | 1                       | 0                                      | 0                                      | 0                                                  | 0            | 0                     | 0    |
| <i>CDC42BP B</i>  | 1                       | 0                                      | 0                                      | 0                                                  | 0            | 0                     | 0    |
| <i>CDC45</i>      | 0                       | 0                                      | 0                                      | 0                                                  | 0            | 0                     | 1    |
| <i>CDCA2</i>      | 1                       | 0                                      | 0                                      | 0                                                  | 0            | 0                     | 0    |
| <i>CDG1L</i>      | 0                       | 0                                      | 0                                      | 0                                                  | 0            | 0                     | 1    |
| <i>CDG2G</i>      | 0                       | 0                                      | 0                                      | 0                                                  | 0            | 0                     | 1    |
| <i>CDGF</i>       | 0                       | 0                                      | 0                                      | 0                                                  | 0            | 0                     | 1    |
| <i>CDH2</i>       | 0                       | 0                                      | 0                                      | 0                                                  | 0            | 1                     | 0    |
| <i>CDK12</i>      | 1                       | 0                                      | 0                                      | 0                                                  | 0            | 0                     | 0    |
| <i>CDK6</i>       | 1                       | 0                                      | 0                                      | 1                                                  | 1            | 1                     | 0    |
| <i>CDKALI</i>     | 1                       | 0                                      | 0                                      | 0                                                  | 0            | 0                     | 0    |
| <i>CDKL2</i>      | 1                       | 0                                      | 0                                      | 0                                                  | 0            | 0                     | 0    |
| <i>CDKN1A</i>     | 1                       | 0                                      | 0                                      | 1                                                  | 1            | 1                     | 0    |
| <i>CDKN1B</i>     | 1                       | 0                                      | 0                                      | 0                                                  | 0            | 0                     | 0    |
| <i>CDKN2B</i>     | 0                       | 0                                      | 0                                      | 0                                                  | 0            | 1                     | 0    |
| <i>CDKN2B-AS1</i> | 0                       | 0                                      | 0                                      | 0                                                  | 1            | 1                     | 0    |
| <i>CDKN2C</i>     | 1                       | 0                                      | 0                                      | 0                                                  | 0            | 0                     | 0    |
| <i>CDLS1</i>      | 0                       | 0                                      | 0                                      | 0                                                  | 0            | 0                     | 1    |
| <i>CDRT4</i>      | 0                       | 0                                      | 0                                      | 0                                                  | 0            | 1                     | 0    |
| <i>CDS1</i>       | 0                       | 0                                      | 0                                      | 0                                                  | 0            | 1                     | 0    |

| Gene           | Multi-omics integration | Gene-based result from AFGen 2017 GWAS | Gene-based result from AFGen 2018 GWAS | Meta-analysis of SNPs by two large AF GWAS in 2018 | GWAS catalog | Open Targets Platform | OMIM |
|----------------|-------------------------|----------------------------------------|----------------------------------------|----------------------------------------------------|--------------|-----------------------|------|
| <i>CEACAM5</i> | 0                       | 0                                      | 0                                      | 0                                                  | 0            | 1                     | 0    |
| <i>CEBPA</i>   | 1                       | 0                                      | 0                                      | 0                                                  | 0            | 0                     | 0    |
| <i>CEBPB</i>   | 1                       | 0                                      | 0                                      | 0                                                  | 0            | 0                     | 0    |
| <i>CEBPZ</i>   | 0                       | 0                                      | 0                                      | 0                                                  | 0            | 1                     | 0    |
| <i>CECRI</i>   | 0                       | 0                                      | 0                                      | 0                                                  | 0            | 0                     | 1    |
| <i>CED2</i>    | 0                       | 0                                      | 0                                      | 0                                                  | 0            | 0                     | 1    |
| <i>CELA3B</i>  | 0                       | 0                                      | 0                                      | 0                                                  | 1            | 0                     | 0    |
| <i>CELSR2</i>  | 0                       | 0                                      | 0                                      | 0                                                  | 1            | 1                     | 0    |
| <i>CENPJ</i>   | 0                       | 0                                      | 0                                      | 0                                                  | 0            | 1                     | 0    |
| <i>CENPO</i>   | 1                       | 0                                      | 0                                      | 0                                                  | 0            | 0                     | 0    |
| <i>CENPV</i>   | 1                       | 0                                      | 0                                      | 0                                                  | 0            | 0                     | 0    |
| <i>CEP250</i>  | 1                       | 0                                      | 0                                      | 0                                                  | 0            | 0                     | 0    |
| <i>CEP41</i>   | 0                       | 0                                      | 0                                      | 0                                                  | 0            | 0                     | 1    |
| <i>CEP57</i>   | 0                       | 0                                      | 0                                      | 0                                                  | 0            | 0                     | 1    |
| <i>CEP68</i>   | 0                       | 1                                      | 1                                      | 1                                                  | 1            | 1                     | 0    |
| <i>CEP85L</i>  | 0                       | 0                                      | 0                                      | 0                                                  | 1            | 1                     | 0    |
| <i>CETP</i>    | 0                       | 0                                      | 0                                      | 0                                                  | 1            | 1                     | 0    |
| <i>CFB</i>     | 1                       | 0                                      | 0                                      | 0                                                  | 0            | 0                     | 0    |
| <i>CFC1</i>    | 0                       | 0                                      | 0                                      | 0                                                  | 0            | 0                     | 1    |
| <i>CFC2</i>    | 0                       | 0                                      | 0                                      | 0                                                  | 0            | 0                     | 1    |
| <i>CFI</i>     | 0                       | 0                                      | 0                                      | 0                                                  | 0            | 1                     | 0    |
| <i>CFL2</i>    | 1                       | 0                                      | 1                                      | 1                                                  | 1            | 1                     | 0    |
| <i>CFSMR</i>   | 0                       | 0                                      | 0                                      | 0                                                  | 0            | 0                     | 1    |
| <i>CFTD</i>    | 0                       | 0                                      | 0                                      | 0                                                  | 0            | 0                     | 1    |
| <i>CFZS</i>    | 0                       | 0                                      | 0                                      | 0                                                  | 0            | 0                     | 1    |
| <i>CGA</i>     | 1                       | 0                                      | 1                                      | 1                                                  | 1            | 0                     | 0    |
| <i>CGL4</i>    | 0                       | 0                                      | 0                                      | 0                                                  | 0            | 0                     | 1    |
| <i>CGN</i>     | 1                       | 0                                      | 0                                      | 0                                                  | 0            | 0                     | 0    |
| <i>CGNL1</i>   | 0                       | 0                                      | 0                                      | 0                                                  | 1            | 1                     | 0    |
| <i>CHAF1A</i>  | 0                       | 0                                      | 0                                      | 0                                                  | 0            | 1                     | 0    |
| <i>CHAPLE</i>  | 0                       | 0                                      | 0                                      | 0                                                  | 0            | 0                     | 1    |
| <i>CHCHD1</i>  | 1                       | 1                                      | 1                                      | 0                                                  | 0            | 0                     | 0    |
| <i>CHCHD10</i> | 1                       | 0                                      | 0                                      | 0                                                  | 0            | 0                     | 0    |
| <i>CHD6</i>    | 1                       | 0                                      | 0                                      | 0                                                  | 0            | 0                     | 0    |
| <i>CHD7</i>    | 0                       | 0                                      | 0                                      | 0                                                  | 0            | 0                     | 1    |
| <i>CHDFID</i>  | 0                       | 0                                      | 0                                      | 0                                                  | 0            | 0                     | 1    |
| <i>CHDSKM</i>  | 0                       | 0                                      | 0                                      | 0                                                  | 0            | 0                     | 1    |
| <i>CHDTHP</i>  | 0                       | 0                                      | 0                                      | 0                                                  | 0            | 0                     | 1    |
| <i>CHEK1</i>   | 1                       | 0                                      | 0                                      | 0                                                  | 0            | 0                     | 0    |
| <i>CHEK2</i>   | 0                       | 0                                      | 0                                      | 0                                                  | 0            | 1                     | 0    |
| <i>CHGA</i>    | 0                       | 0                                      | 0                                      | 0                                                  | 0            | 1                     | 0    |

| Gene          | Multi-omics integration | Gene-based result from AFGen 2017 GWAS | Gene-based result from AFGen 2018 GWAS | Meta-analysis of SNPs by two large AF GWAS in 2018 | GWAS catalog | Open Targets Platform | OMIM |
|---------------|-------------------------|----------------------------------------|----------------------------------------|----------------------------------------------------|--------------|-----------------------|------|
| <i>CHGB</i>   | 0                       | 0                                      | 0                                      | 0                                                  | 0            | 1                     | 0    |
| <i>CHI3L1</i> | 1                       | 0                                      | 0                                      | 0                                                  | 0            | 1                     | 0    |
| <i>CHID1</i>  | 1                       | 0                                      | 0                                      | 0                                                  | 0            | 0                     | 0    |
| <i>CHIT1</i>  | 1                       | 0                                      | 0                                      | 0                                                  | 0            | 0                     | 0    |
| <i>CHN1</i>   | 0                       | 0                                      | 0                                      | 0                                                  | 0            | 0                     | 1    |
| <i>CHN3</i>   | 0                       | 0                                      | 0                                      | 0                                                  | 0            | 0                     | 1    |
| <i>CHRNA1</i> | 1                       | 0                                      | 0                                      | 0                                                  | 0            | 0                     | 0    |
| <i>CHRNB1</i> | 1                       | 0                                      | 1                                      | 0                                                  | 0            | 0                     | 0    |
| <i>CHRNB2</i> | 1                       | 0                                      | 0                                      | 0                                                  | 0            | 0                     | 0    |
| <i>CHRNB4</i> | 1                       | 0                                      | 0                                      | 0                                                  | 0            | 0                     | 0    |
| <i>CHTD2</i>  | 0                       | 0                                      | 0                                      | 0                                                  | 0            | 0                     | 1    |
| <i>CHTD3</i>  | 0                       | 0                                      | 0                                      | 0                                                  | 0            | 0                     | 1    |
| <i>CHTD5</i>  | 0                       | 0                                      | 0                                      | 0                                                  | 0            | 0                     | 1    |
| <i>CHTD6</i>  | 0                       | 0                                      | 0                                      | 0                                                  | 0            | 0                     | 1    |
| <i>CIART</i>  | 0                       | 0                                      | 0                                      | 0                                                  | 0            | 1                     | 0    |
| <i>CIB1</i>   | 0                       | 0                                      | 0                                      | 0                                                  | 0            | 1                     | 0    |
| <i>CIC</i>    | 1                       | 0                                      | 0                                      | 0                                                  | 0            | 0                     | 0    |
| <i>CILD25</i> | 0                       | 0                                      | 0                                      | 0                                                  | 0            | 0                     | 1    |
| <i>CILP</i>   | 1                       | 0                                      | 0                                      | 0                                                  | 0            | 0                     | 0    |
| <i>CISD2</i>  | 0                       | 0                                      | 1                                      | 0                                                  | 0            | 0                     | 0    |
| <i>CITED2</i> | 0                       | 0                                      | 0                                      | 0                                                  | 0            | 0                     | 1    |
| <i>CKAP5</i>  | 1                       | 0                                      | 0                                      | 0                                                  | 0            | 0                     | 0    |
| <i>CLASP2</i> | 1                       | 0                                      | 0                                      | 0                                                  | 0            | 0                     | 0    |
| <i>CLCN6</i>  | 1                       | 0                                      | 0                                      | 0                                                  | 0            | 0                     | 0    |
| <i>CLDN19</i> | 0                       | 0                                      | 0                                      | 0                                                  | 0            | 1                     | 0    |
| <i>CLDN7</i>  | 1                       | 0                                      | 0                                      | 0                                                  | 0            | 0                     | 0    |
| <i>CLDND1</i> | 1                       | 0                                      | 0                                      | 0                                                  | 0            | 0                     | 0    |
| <i>CLEC5A</i> | 1                       | 0                                      | 0                                      | 0                                                  | 0            | 0                     | 0    |
| <i>CLIC1</i>  | 1                       | 0                                      | 0                                      | 0                                                  | 0            | 0                     | 0    |
| <i>CLIC2</i>  | 0                       | 0                                      | 0                                      | 0                                                  | 0            | 1                     | 0    |
| <i>CLIC6</i>  | 1                       | 0                                      | 0                                      | 0                                                  | 0            | 1                     | 0    |
| <i>CLIP1</i>  | 0                       | 0                                      | 0                                      | 0                                                  | 0            | 1                     | 0    |
| <i>CLIP2</i>  | 1                       | 0                                      | 0                                      | 0                                                  | 0            | 0                     | 0    |
| <i>CLK2</i>   | 1                       | 0                                      | 0                                      | 0                                                  | 0            | 0                     | 0    |
| <i>CLPX</i>   | 1                       | 0                                      | 0                                      | 0                                                  | 0            | 0                     | 0    |
| <i>CLSTN3</i> | 0                       | 0                                      | 0                                      | 0                                                  | 0            | 1                     | 0    |
| <i>CLTB</i>   | 1                       | 0                                      | 0                                      | 0                                                  | 0            | 0                     | 0    |
| <i>CLU</i>    | 0                       | 0                                      | 0                                      | 0                                                  | 0            | 1                     | 0    |
| <i>CMA1</i>   | 0                       | 0                                      | 0                                      | 0                                                  | 0            | 1                     | 0    |
| <i>CMAS</i>   | 1                       | 0                                      | 0                                      | 0                                                  | 0            | 0                     | 0    |
| <i>CMBL</i>   | 1                       | 0                                      | 0                                      | 0                                                  | 0            | 0                     | 0    |
| <i>CMD1A</i>  | 0                       | 0                                      | 0                                      | 0                                                  | 0            | 0                     | 1    |
| <i>CMD1AA</i> | 0                       | 0                                      | 0                                      | 0                                                  | 0            | 0                     | 1    |
| <i>CMD1D</i>  | 0                       | 0                                      | 0                                      | 0                                                  | 0            | 0                     | 1    |



| Gene           | Multi-omics integration | Gene-based result from AFGen 2017 GWAS | Gene-based result from AFGen 2018 GWAS | Meta-analysis of SNPs by two large AF GWAS in 2018 | GWAS catalog | Open Targets Platform | OMIM |
|----------------|-------------------------|----------------------------------------|----------------------------------------|----------------------------------------------------|--------------|-----------------------|------|
| <i>CMD1E</i>   | 0                       | 0                                      | 0                                      | 0                                                  | 0            | 0                     | 1    |
| <i>CMD1I</i>   | 0                       | 0                                      | 0                                      | 0                                                  | 0            | 0                     | 1    |
| <i>CMD1KK</i>  | 0                       | 0                                      | 0                                      | 0                                                  | 0            | 0                     | 1    |
| <i>CMD1P</i>   | 0                       | 0                                      | 0                                      | 0                                                  | 0            | 0                     | 1    |
| <i>CMD1R</i>   | 0                       | 0                                      | 0                                      | 0                                                  | 0            | 0                     | 1    |
| <i>CMD1S</i>   | 0                       | 0                                      | 0                                      | 0                                                  | 0            | 0                     | 1    |
| <i>CMD1Y</i>   | 0                       | 0                                      | 0                                      | 0                                                  | 0            | 0                     | 1    |
| <i>CMD2B</i>   | 0                       | 0                                      | 0                                      | 0                                                  | 0            | 0                     | 1    |
| <i>CMH1</i>    | 0                       | 0                                      | 0                                      | 0                                                  | 0            | 0                     | 1    |
| <i>CMH10</i>   | 0                       | 0                                      | 0                                      | 0                                                  | 0            | 0                     | 1    |
| <i>CMH11</i>   | 0                       | 0                                      | 0                                      | 0                                                  | 0            | 0                     | 1    |
| <i>CMH12</i>   | 0                       | 0                                      | 0                                      | 0                                                  | 0            | 0                     | 1    |
| <i>CMH13</i>   | 0                       | 0                                      | 0                                      | 0                                                  | 0            | 0                     | 1    |
| <i>CMH16</i>   | 0                       | 0                                      | 0                                      | 0                                                  | 0            | 0                     | 1    |
| <i>CMH18</i>   | 0                       | 0                                      | 0                                      | 0                                                  | 0            | 0                     | 1    |
| <i>CMH2</i>    | 0                       | 0                                      | 0                                      | 0                                                  | 0            | 0                     | 1    |
| <i>CMH20</i>   | 0                       | 0                                      | 0                                      | 0                                                  | 0            | 0                     | 1    |
| <i>CMH26</i>   | 0                       | 0                                      | 0                                      | 0                                                  | 0            | 0                     | 1    |
| <i>CMH4</i>    | 0                       | 0                                      | 0                                      | 0                                                  | 0            | 0                     | 1    |
| <i>CMH6</i>    | 0                       | 0                                      | 0                                      | 0                                                  | 0            | 0                     | 1    |
| <i>CMH7</i>    | 0                       | 0                                      | 0                                      | 0                                                  | 0            | 0                     | 1    |
| <i>CMH8</i>    | 0                       | 0                                      | 0                                      | 0                                                  | 0            | 0                     | 1    |
| <i>CMT2D</i>   | 0                       | 0                                      | 0                                      | 0                                                  | 0            | 0                     | 1    |
| <i>CMT2L</i>   | 0                       | 0                                      | 0                                      | 0                                                  | 0            | 0                     | 1    |
| <i>CMTM5</i>   | 1                       | 0                                      | 1                                      | 0                                                  | 0            | 0                     | 0    |
| <i>CNC1</i>    | 0                       | 0                                      | 0                                      | 0                                                  | 0            | 0                     | 1    |
| <i>CNC2</i>    | 0                       | 0                                      | 0                                      | 0                                                  | 0            | 0                     | 1    |
| <i>CNGA1</i>   | 1                       | 0                                      | 0                                      | 0                                                  | 0            | 0                     | 0    |
| <i>CNM2</i>    | 0                       | 0                                      | 0                                      | 0                                                  | 0            | 0                     | 1    |
| <i>CNNM2</i>   | 1                       | 0                                      | 0                                      | 0                                                  | 0            | 0                     | 0    |
| <i>CNR1</i>    | 0                       | 0                                      | 0                                      | 0                                                  | 0            | 1                     | 0    |
| <i>CNR2</i>    | 1                       | 0                                      | 0                                      | 0                                                  | 0            | 1                     | 0    |
| <i>CNTD1</i>   | 1                       | 0                                      | 0                                      | 0                                                  | 0            | 0                     | 0    |
| <i>CNTN5</i>   | 0                       | 0                                      | 0                                      | 0                                                  | 1            | 1                     | 0    |
| <i>COG5</i>    | 1                       | 0                                      | 0                                      | 0                                                  | 1            | 1                     | 0    |
| <i>COG8</i>    | 1                       | 0                                      | 0                                      | 0                                                  | 0            | 0                     | 0    |
| <i>COGIS</i>   | 0                       | 0                                      | 0                                      | 0                                                  | 0            | 0                     | 1    |
| <i>COL15A1</i> | 1                       | 0                                      | 0                                      | 0                                                  | 0            | 0                     | 0    |
| <i>COL1A2</i>  | 0                       | 0                                      | 0                                      | 0                                                  | 0            | 0                     | 1    |
| <i>COL21A1</i> | 0                       | 0                                      | 0                                      | 0                                                  | 0            | 0                     | 1    |
| <i>COL25A1</i> | 1                       | 0                                      | 0                                      | 0                                                  | 0            | 0                     | 0    |
| <i>COL4A3B</i> | 0                       | 0                                      | 0                                      | 0                                                  | 1            | 1                     | 0    |
| <i>P</i>       | 0                       | 0                                      | 0                                      | 0                                                  | 1            | 1                     | 0    |
| <i>COMMD4</i>  | 1                       | 0                                      | 0                                      | 0                                                  | 0            | 0                     | 0    |

| Gene           | Multi-omics integration | Gene-based result from AFGen 2017 GWAS | Gene-based result from AFGen 2018 GWAS | Meta-analysis of SNPs by two large AF GWAS in 2018 | GWAS catalog | Open Targets Platform | OMIM |
|----------------|-------------------------|----------------------------------------|----------------------------------------|----------------------------------------------------|--------------|-----------------------|------|
| <i>COMP</i>    | 0                       | 0                                      | 0                                      | 0                                                  | 0            | 1                     | 0    |
| <i>COPA</i>    | 1                       | 0                                      | 0                                      | 0                                                  | 0            | 0                     | 0    |
| <i>COPB1</i>   | 1                       | 0                                      | 0                                      | 0                                                  | 0            | 0                     | 0    |
| <i>COPS4</i>   | 1                       | 1                                      | 0                                      | 0                                                  | 0            | 0                     | 0    |
| <i>COQ10A</i>  | 1                       | 0                                      | 0                                      | 0                                                  | 0            | 0                     | 0    |
| <i>COQ10B</i>  | 1                       | 0                                      | 0                                      | 0                                                  | 0            | 0                     | 0    |
| <i>CORIN</i>   | 1                       | 0                                      | 0                                      | 0                                                  | 0            | 1                     | 1    |
| <i>CORO1A</i>  | 1                       | 0                                      | 0                                      | 0                                                  | 0            | 0                     | 0    |
| <i>COX15</i>   | 1                       | 0                                      | 0                                      | 0                                                  | 0            | 0                     | 0    |
| <i>COX7B</i>   | 0                       | 0                                      | 0                                      | 0                                                  | 0            | 0                     | 1    |
| <i>CP</i>      | 0                       | 0                                      | 0                                      | 0                                                  | 0            | 1                     | 0    |
| <i>CPB1</i>    | 0                       | 0                                      | 0                                      | 0                                                  | 0            | 1                     | 0    |
| <i>CPCMR</i>   | 0                       | 0                                      | 0                                      | 0                                                  | 0            | 0                     | 1    |
| <i>CPEB4</i>   | 1                       | 0                                      | 0                                      | 1                                                  | 1            | 1                     | 0    |
| <i>CPNE1</i>   | 1                       | 0                                      | 0                                      | 0                                                  | 0            | 0                     | 0    |
| <i>CPNE7</i>   | 1                       | 0                                      | 0                                      | 0                                                  | 0            | 0                     | 0    |
| <i>CPNE8</i>   | 1                       | 0                                      | 0                                      | 0                                                  | 0            | 0                     | 0    |
| <i>CPOX</i>    | 1                       | 0                                      | 0                                      | 0                                                  | 0            | 1                     | 0    |
| <i>CPSF3</i>   | 1                       | 0                                      | 0                                      | 0                                                  | 0            | 0                     | 0    |
| <i>CPVT1</i>   | 0                       | 0                                      | 0                                      | 0                                                  | 0            | 0                     | 1    |
| <i>CPVT3</i>   | 0                       | 0                                      | 0                                      | 0                                                  | 0            | 0                     | 1    |
| <i>CPVT4</i>   | 0                       | 0                                      | 0                                      | 0                                                  | 0            | 0                     | 1    |
| <i>CRADD</i>   | 1                       | 0                                      | 0                                      | 0                                                  | 0            | 0                     | 0    |
| <i>CRAMP1</i>  | 0                       | 0                                      | 0                                      | 1                                                  | 0            | 0                     | 0    |
| <i>CRAMP1L</i> | 0                       | 0                                      | 0                                      | 0                                                  | 1            | 0                     | 0    |
| <i>CRAT</i>    | 1                       | 0                                      | 0                                      | 0                                                  | 0            | 0                     | 0    |
| <i>CREB1</i>   | 1                       | 0                                      | 0                                      | 0                                                  | 0            | 0                     | 0    |
| <i>CREB3L2</i> | 1                       | 0                                      | 0                                      | 0                                                  | 0            | 0                     | 0    |
| <i>CREB3L4</i> | 1                       | 0                                      | 0                                      | 0                                                  | 0            | 0                     | 0    |
| <i>CREB5</i>   | 1                       | 0                                      | 1                                      | 1                                                  | 1            | 1                     | 0    |
| <i>CRELD1</i>  | 0                       | 0                                      | 0                                      | 0                                                  | 0            | 0                     | 1    |
| <i>CREM</i>    | 1                       | 0                                      | 0                                      | 0                                                  | 0            | 1                     | 0    |
| <i>CRHR1</i>   | 1                       | 0                                      | 0                                      | 0                                                  | 0            | 0                     | 0    |
| <i>CRIM1</i>   | 1                       | 0                                      | 0                                      | 0                                                  | 0            | 0                     | 0    |
| <i>CRK</i>     | 1                       | 0                                      | 1                                      | 1                                                  | 1            | 0                     | 0    |
| <i>CRLS1</i>   | 0                       | 0                                      | 0                                      | 0                                                  | 0            | 1                     | 0    |
| <i>CRP</i>     | 0                       | 0                                      | 0                                      | 0                                                  | 0            | 1                     | 0    |
| <i>CRPT1</i>   | 0                       | 0                                      | 0                                      | 0                                                  | 0            | 0                     | 1    |
| <i>CRPT2</i>   | 0                       | 0                                      | 0                                      | 0                                                  | 0            | 0                     | 1    |
| <i>CRTAP</i>   | 1                       | 0                                      | 0                                      | 0                                                  | 0            | 0                     | 0    |
| <i>CRYGC</i>   | 0                       | 0                                      | 0                                      | 0                                                  | 0            | 1                     | 0    |
| <i>CS</i>      | 1                       | 0                                      | 0                                      | 0                                                  | 0            | 0                     | 0    |
| <i>CSF2</i>    | 1                       | 0                                      | 0                                      | 0                                                  | 0            | 1                     | 0    |
| <i>CSF3</i>    | 1                       | 1                                      | 0                                      | 0                                                  | 0            | 1                     | 0    |

| Gene           | Multi-omics integration | Gene-based result from AFGen 2017 GWAS | Gene-based result from AFGen 2018 GWAS | Meta-analysis of SNPs by two large AF GWAS in 2018 | GWAS catalog | Open Targets Platform | OMIM |
|----------------|-------------------------|----------------------------------------|----------------------------------------|----------------------------------------------------|--------------|-----------------------|------|
| <i>CSMD1</i>   | 0                       | 0                                      | 0                                      | 0                                                  | 0            | 1                     | 0    |
| <i>CSN1S1</i>  | 0                       | 0                                      | 0                                      | 0                                                  | 0            | 1                     | 0    |
| <i>CSNK1G2</i> | 1                       | 0                                      | 0                                      | 0                                                  | 0            | 0                     | 0    |
| <i>CSNK1G3</i> | 0                       | 0                                      | 0                                      | 0                                                  | 0            | 1                     | 0    |
| <i>CSNK2B</i>  | 1                       | 0                                      | 0                                      | 0                                                  | 0            | 0                     | 0    |
| <i>CSPG4</i>   | 1                       | 0                                      | 0                                      | 0                                                  | 0            | 0                     | 0    |
| <i>CSPG5</i>   | 0                       | 0                                      | 0                                      | 0                                                  | 0            | 1                     | 0    |
| <i>CSRP3</i>   | 1                       | 0                                      | 0                                      | 0                                                  | 0            | 0                     | 0    |
| <i>CSS1</i>    | 0                       | 0                                      | 0                                      | 0                                                  | 0            | 0                     | 1    |
| <i>CSS5</i>    | 0                       | 0                                      | 0                                      | 0                                                  | 0            | 0                     | 1    |
| <i>CSS6</i>    | 0                       | 0                                      | 0                                      | 0                                                  | 0            | 0                     | 1    |
| <i>CST3</i>    | 0                       | 0                                      | 0                                      | 0                                                  | 0            | 1                     | 0    |
| <i>CST7</i>    | 1                       | 0                                      | 0                                      | 0                                                  | 0            | 0                     | 0    |
| <i>CSTA</i>    | 1                       | 0                                      | 0                                      | 0                                                  | 0            | 0                     | 0    |
| <i>CSTLO</i>   | 0                       | 0                                      | 0                                      | 0                                                  | 0            | 0                     | 1    |
| <i>CTBP1</i>   | 1                       | 0                                      | 0                                      | 0                                                  | 0            | 0                     | 0    |
| <i>CTCF</i>    | 0                       | 0                                      | 0                                      | 0                                                  | 0            | 0                     | 1    |
| <i>CTDSPL</i>  | 1                       | 0                                      | 0                                      | 0                                                  | 0            | 0                     | 0    |
| <i>CTF1</i>    | 0                       | 0                                      | 0                                      | 0                                                  | 0            | 1                     | 0    |
| <i>CTHM</i>    | 0                       | 0                                      | 0                                      | 0                                                  | 0            | 0                     | 1    |
| <i>CTNNA2</i>  | 1                       | 0                                      | 0                                      | 0                                                  | 0            | 0                     | 0    |
| <i>CTNNAL1</i> | 1                       | 0                                      | 0                                      | 0                                                  | 0            | 0                     | 0    |
| <i>CTSA</i>    | 0                       | 0                                      | 0                                      | 0                                                  | 0            | 1                     | 0    |
| <i>CTSB</i>    | 1                       | 0                                      | 0                                      | 0                                                  | 0            | 0                     | 0    |
| <i>CTSF</i>    | 1                       | 0                                      | 0                                      | 0                                                  | 0            | 0                     | 0    |
| <i>CTSK</i>    | 1                       | 0                                      | 0                                      | 0                                                  | 0            | 1                     | 0    |
| <i>CTSL</i>    | 0                       | 0                                      | 0                                      | 0                                                  | 0            | 0                     | 1    |
| <i>CTSV</i>    | 0                       | 0                                      | 0                                      | 0                                                  | 0            | 1                     | 0    |
| <i>CTSZ</i>    | 0                       | 0                                      | 0                                      | 0                                                  | 0            | 1                     | 0    |
| <i>CTTN</i>    | 1                       | 0                                      | 0                                      | 0                                                  | 0            | 0                     | 0    |
| <i>CUEDC2</i>  | 1                       | 0                                      | 0                                      | 0                                                  | 0            | 0                     | 0    |
| <i>CUL4A</i>   | 1                       | 0                                      | 0                                      | 1                                                  | 1            | 0                     | 0    |
| <i>CUTC</i>    | 1                       | 0                                      | 0                                      | 0                                                  | 0            | 0                     | 0    |
| <i>CUX2</i>    | 0                       | 0                                      | 0                                      | 0                                                  | 1            | 1                     | 0    |
| <i>CVDD</i>    | 0                       | 0                                      | 0                                      | 0                                                  | 0            | 0                     | 1    |
| <i>CWF19L1</i> | 1                       | 0                                      | 0                                      | 0                                                  | 0            | 0                     | 0    |
| <i>CWS1</i>    | 0                       | 0                                      | 0                                      | 0                                                  | 0            | 0                     | 1    |
| <i>CX3CL1</i>  | 0                       | 0                                      | 0                                      | 0                                                  | 0            | 1                     | 0    |
| <i>CX3CR1</i>  | 1                       | 0                                      | 0                                      | 0                                                  | 0            | 0                     | 0    |
| <i>CXCL10</i>  | 0                       | 0                                      | 0                                      | 0                                                  | 0            | 1                     | 0    |
| <i>CXCL12</i>  | 0                       | 0                                      | 0                                      | 0                                                  | 0            | 1                     | 0    |
| <i>CXCL8</i>   | 0                       | 0                                      | 0                                      | 0                                                  | 0            | 1                     | 0    |
| <i>CXCR4</i>   | 0                       | 0                                      | 0                                      | 0                                                  | 0            | 1                     | 0    |
| <i>CYB5A</i>   | 1                       | 0                                      | 0                                      | 0                                                  | 0            | 0                     | 0    |

| Gene           | Multi-omics integration | Gene-based result from AFGen 2017 GWAS | Gene-based result from AFGen 2018 GWAS | Meta-analysis of SNPs by two large AF GWAS in 2018 | GWAS catalog | Open Targets Platform | OMIM |
|----------------|-------------------------|----------------------------------------|----------------------------------------|----------------------------------------------------|--------------|-----------------------|------|
| <i>CYB5R1</i>  | 1                       | 0                                      | 0                                      | 0                                                  | 0            | 0                     | 0    |
| <i>CYB5R3</i>  | 1                       | 0                                      | 0                                      | 0                                                  | 0            | 0                     | 0    |
| <i>CYBB</i>    | 0                       | 0                                      | 0                                      | 0                                                  | 0            | 1                     | 0    |
| <i>CYBRD1</i>  | 0                       | 0                                      | 0                                      | 0                                                  | 0            | 1                     | 0    |
| <i>CYCS</i>    | 0                       | 0                                      | 0                                      | 0                                                  | 0            | 1                     | 0    |
| <i>CYP11A1</i> | 0                       | 0                                      | 0                                      | 0                                                  | 0            | 0                     | 1    |
| <i>CYP11B1</i> | 0                       | 0                                      | 0                                      | 0                                                  | 0            | 0                     | 1    |
| <i>CYP11B2</i> | 0                       | 0                                      | 0                                      | 0                                                  | 0            | 1                     | 0    |
| <i>CYP17A1</i> | 1                       | 0                                      | 0                                      | 0                                                  | 0            | 0                     | 1    |
| <i>CYP1A1</i>  | 0                       | 0                                      | 0                                      | 0                                                  | 0            | 1                     | 0    |
| <i>CYP1A2</i>  | 0                       | 0                                      | 0                                      | 0                                                  | 0            | 1                     | 0    |
| <i>CYP20A1</i> | 0                       | 0                                      | 0                                      | 0                                                  | 0            | 1                     | 0    |
| <i>CYP21A2</i> | 1                       | 0                                      | 0                                      | 0                                                  | 1            | 1                     | 1    |
| <i>CYP26B1</i> | 1                       | 0                                      | 0                                      | 0                                                  | 0            | 0                     | 0    |
| <i>CYP2C19</i> | 0                       | 0                                      | 0                                      | 0                                                  | 0            | 1                     | 0    |
| <i>CYP2C9</i>  | 0                       | 0                                      | 0                                      | 0                                                  | 0            | 1                     | 0    |
| <i>CYP2D6</i>  | 0                       | 0                                      | 0                                      | 0                                                  | 0            | 1                     | 0    |
| <i>CYP2J2</i>  | 0                       | 0                                      | 0                                      | 0                                                  | 0            | 1                     | 0    |
| <i>CYP39A1</i> | 1                       | 0                                      | 0                                      | 0                                                  | 0            | 0                     | 0    |
| <i>CYP3A4</i>  | 0                       | 0                                      | 0                                      | 0                                                  | 0            | 1                     | 0    |
| <i>CYP3A5</i>  | 0                       | 0                                      | 0                                      | 0                                                  | 0            | 1                     | 0    |
| <i>CYP4F2</i>  | 0                       | 0                                      | 0                                      | 0                                                  | 0            | 1                     | 0    |
| <i>CYTH1</i>   | 0                       | 0                                      | 0                                      | 1                                                  | 1            | 0                     | 0    |
| <i>DA9</i>     | 0                       | 0                                      | 0                                      | 0                                                  | 0            | 0                     | 1    |
| <i>DAP3</i>    | 1                       | 0                                      | 0                                      | 0                                                  | 0            | 0                     | 0    |
| <i>DAPK2</i>   | 1                       | 0                                      | 0                                      | 0                                                  | 0            | 0                     | 0    |
| <i>DBA1</i>    | 0                       | 0                                      | 0                                      | 0                                                  | 0            | 0                     | 1    |
| <i>DBA16</i>   | 0                       | 0                                      | 0                                      | 0                                                  | 0            | 0                     | 1    |
| <i>DBA4</i>    | 0                       | 0                                      | 0                                      | 0                                                  | 0            | 0                     | 1    |
| <i>DBA6</i>    | 0                       | 0                                      | 0                                      | 0                                                  | 0            | 0                     | 1    |
| <i>DBA7</i>    | 0                       | 0                                      | 0                                      | 0                                                  | 0            | 0                     | 1    |
| <i>DBN1</i>    | 0                       | 0                                      | 0                                      | 0                                                  | 0            | 1                     | 0    |
| <i>DBT</i>     | 0                       | 0                                      | 0                                      | 0                                                  | 0            | 1                     | 0    |
| <i>DCAF12</i>  | 1                       | 0                                      | 0                                      | 0                                                  | 0            | 0                     | 0    |
| <i>DCAF4</i>   | 1                       | 0                                      | 1                                      | 0                                                  | 0            | 0                     | 0    |
| <i>DCAF5</i>   | 1                       | 0                                      | 0                                      | 0                                                  | 0            | 0                     | 0    |
| <i>DCAF8</i>   | 1                       | 0                                      | 0                                      | 0                                                  | 0            | 0                     | 0    |
| <i>DKAKD</i>   | 1                       | 0                                      | 0                                      | 0                                                  | 0            | 0                     | 0    |
| <i>DCBLD1</i>  | 1                       | 0                                      | 0                                      | 0                                                  | 1            | 1                     | 0    |
| <i>DCC</i>     | 0                       | 0                                      | 0                                      | 0                                                  | 0            | 1                     | 0    |
| <i>DCK</i>     | 1                       | 0                                      | 0                                      | 0                                                  | 0            | 0                     | 0    |
| <i>DCN</i>     | 0                       | 0                                      | 0                                      | 0                                                  | 0            | 1                     | 0    |
| <i>DCST1</i>   | 1                       | 1                                      | 1                                      | 0                                                  | 0            | 0                     | 0    |
| <i>DCST2</i>   | 1                       | 1                                      | 1                                      | 0                                                  | 0            | 0                     | 0    |

| Gene            | Multi-omics integration | Gene-based result from AFGen 2017 GWAS | Gene-based result from AFGen 2018 GWAS | Meta-analysis of SNPs by two large AF GWAS in 2018 | GWAS catalog | Open Targets Platform | OMIM |
|-----------------|-------------------------|----------------------------------------|----------------------------------------|----------------------------------------------------|--------------|-----------------------|------|
| <i>DCT</i>      | 0                       | 0                                      | 0                                      | 0                                                  | 0            | 1                     | 0    |
| <i>DCTN2</i>    | 0                       | 0                                      | 0                                      | 0                                                  | 0            | 1                     | 0    |
| <i>DCUN1D2</i>  | 1                       | 0                                      | 0                                      | 0                                                  | 0            | 0                     | 0    |
| <i>DDAH2</i>    | 1                       | 0                                      | 0                                      | 0                                                  | 0            | 0                     | 0    |
| <i>DDOST</i>    | 1                       | 0                                      | 0                                      | 0                                                  | 0            | 0                     | 0    |
| <i>DDR2</i>     | 0                       | 0                                      | 0                                      | 0                                                  | 0            | 1                     | 0    |
| <i>DDRKG1</i>   | 0                       | 0                                      | 0                                      | 0                                                  | 0            | 1                     | 0    |
| <i>DDT</i>      | 0                       | 0                                      | 0                                      | 0                                                  | 0            | 1                     | 0    |
| <i>DDX25</i>    | 1                       | 0                                      | 0                                      | 0                                                  | 0            | 0                     | 0    |
| <i>DDX39AP1</i> | 0                       | 0                                      | 0                                      | 0                                                  | 1            | 0                     | 0    |
| <i>DDX54</i>    | 1                       | 0                                      | 0                                      | 0                                                  | 0            | 0                     | 0    |
| <i>DDX59</i>    | 1                       | 0                                      | 0                                      | 0                                                  | 0            | 0                     | 0    |
| <i>DEDD2</i>    | 1                       | 0                                      | 0                                      | 0                                                  | 0            | 0                     | 0    |
| <i>DEFB129</i>  | 1                       | 0                                      | 0                                      | 0                                                  | 0            | 0                     | 0    |
| <i>DEFB132</i>  | 1                       | 0                                      | 0                                      | 0                                                  | 0            | 0                     | 0    |
| <i>DEK</i>      | 0                       | 0                                      | 1                                      | 0                                                  | 0            | 0                     | 0    |
| <i>DENND4A</i>  | 1                       | 0                                      | 0                                      | 0                                                  | 0            | 0                     | 0    |
| <i>DENR</i>     | 1                       | 0                                      | 0                                      | 0                                                  | 0            | 0                     | 0    |
| <i>DERL3</i>    | 1                       | 0                                      | 0                                      | 0                                                  | 0            | 0                     | 0    |
| <i>DES</i>      | 0                       | 0                                      | 0                                      | 0                                                  | 0            | 1                     | 0    |
| <i>DFFA</i>     | 0                       | 0                                      | 0                                      | 0                                                  | 0            | 1                     | 0    |
| <i>DGKB</i>     | 1                       | 0                                      | 0                                      | 1                                                  | 1            | 1                     | 0    |
| <i>DGKZ</i>     | 0                       | 0                                      | 0                                      | 0                                                  | 0            | 1                     | 0    |
| <i>DGS</i>      | 0                       | 0                                      | 0                                      | 0                                                  | 0            | 0                     | 1    |
| <i>DHPS</i>     | 1                       | 0                                      | 0                                      | 0                                                  | 0            | 0                     | 0    |
| <i>DHRS1</i>    | 1                       | 0                                      | 0                                      | 0                                                  | 0            | 0                     | 0    |
| <i>DHRS9</i>    | 0                       | 0                                      | 0                                      | 0                                                  | 0            | 1                     | 0    |
| <i>DHX35</i>    | 1                       | 0                                      | 0                                      | 0                                                  | 0            | 0                     | 0    |
| <i>DHX36</i>    | 0                       | 0                                      | 0                                      | 0                                                  | 0            | 1                     | 0    |
| <i>DIAR10</i>   | 0                       | 0                                      | 0                                      | 0                                                  | 0            | 0                     | 1    |
| <i>DICER1</i>   | 0                       | 0                                      | 0                                      | 0                                                  | 0            | 1                     | 1    |
| <i>DIH2</i>     | 0                       | 0                                      | 0                                      | 0                                                  | 0            | 0                     | 1    |
| <i>DIRAS2</i>   | 1                       | 0                                      | 0                                      | 0                                                  | 0            | 0                     | 0    |
| <i>DIRAS3</i>   | 0                       | 0                                      | 0                                      | 0                                                  | 0            | 1                     | 0    |
| <i>DIS3L2</i>   | 1                       | 0                                      | 0                                      | 0                                                  | 0            | 0                     | 0    |
| <i>DKKL1</i>    | 0                       | 0                                      | 0                                      | 0                                                  | 0            | 1                     | 0    |
| <i>DLC1</i>     | 1                       | 0                                      | 0                                      | 0                                                  | 0            | 0                     | 0    |
| <i>DLEC1</i>    | 1                       | 0                                      | 0                                      | 0                                                  | 0            | 0                     | 0    |
| <i>DLG1</i>     | 0                       | 0                                      | 0                                      | 0                                                  | 0            | 1                     | 0    |
| <i>DLG5</i>     | 0                       | 0                                      | 0                                      | 0                                                  | 0            | 1                     | 0    |
| <i>DLK2</i>     | 1                       | 0                                      | 0                                      | 0                                                  | 0            | 0                     | 0    |

| Gene            | Multi-omics integration | Gene-based result from AFGen 2017 GWAS | Gene-based result from AFGen 2018 GWAS | Meta-analysis of SNPs by two large AF GWAS in 2018 | GWAS catalog | Open Targets Platform | OMIM |
|-----------------|-------------------------|----------------------------------------|----------------------------------------|----------------------------------------------------|--------------|-----------------------|------|
| <i>DLL1</i>     | 0                       | 0                                      | 0                                      | 0                                                  | 0            | 1                     | 0    |
| <i>DLX1</i>     | 1                       | 0                                      | 0                                      | 0                                                  | 0            | 0                     | 0    |
| <i>DLX5</i>     | 1                       | 0                                      | 0                                      | 0                                                  | 0            | 0                     | 0    |
| <i>DLX6</i>     | 1                       | 0                                      | 0                                      | 0                                                  | 0            | 0                     | 0    |
| <i>DMI</i>      | 0                       | 0                                      | 0                                      | 0                                                  | 0            | 0                     | 1    |
| <i>DMC1</i>     | 1                       | 0                                      | 0                                      | 0                                                  | 0            | 0                     | 0    |
| <i>DMD</i>      | 0                       | 0                                      | 0                                      | 0                                                  | 0            | 1                     | 0    |
| <i>DMPK</i>     | 1                       | 0                                      | 0                                      | 0                                                  | 0            | 1                     | 0    |
| <i>DMRT3</i>    | 1                       | 0                                      | 0                                      | 0                                                  | 0            | 0                     | 0    |
| <i>DMRTA1</i>   | 0                       | 0                                      | 0                                      | 0                                                  | 1            | 0                     | 0    |
| <i>DMWD</i>     | 1                       | 0                                      | 0                                      | 0                                                  | 0            | 0                     | 0    |
| <i>DNAH10</i>   | 0                       | 0                                      | 0                                      | 0                                                  | 1            | 0                     | 0    |
| <i>DNAH11</i>   | 0                       | 0                                      | 0                                      | 0                                                  | 0            | 1                     | 0    |
| <i>DNAH12</i>   | 1                       | 0                                      | 0                                      | 0                                                  | 0            | 0                     | 0    |
| <i>DNAH2</i>    | 1                       | 0                                      | 0                                      | 0                                                  | 1            | 1                     | 0    |
| <i>DNAJA4</i>   | 1                       | 0                                      | 0                                      | 0                                                  | 0            | 0                     | 0    |
| <i>DNAJB2</i>   | 1                       | 0                                      | 0                                      | 0                                                  | 0            | 0                     | 0    |
| <i>DNAJB6</i>   | 0                       | 0                                      | 0                                      | 0                                                  | 0            | 1                     | 0    |
| <i>DNAJC1</i>   | 1                       | 0                                      | 0                                      | 0                                                  | 0            | 0                     | 0    |
| <i>DNAJC12</i>  | 1                       | 0                                      | 0                                      | 0                                                  | 0            | 0                     | 0    |
| <i>DNAJC5</i>   | 0                       | 0                                      | 0                                      | 0                                                  | 0            | 1                     | 0    |
| <i>DNAJC5B</i>  | 0                       | 0                                      | 0                                      | 0                                                  | 0            | 1                     | 0    |
| <i>DNAJC9</i>   | 1                       | 0                                      | 0                                      | 0                                                  | 0            | 0                     | 0    |
| <i>DNAL4</i>    | 1                       | 0                                      | 0                                      | 0                                                  | 0            | 0                     | 0    |
| <i>DNASE1L2</i> | 1                       | 0                                      | 0                                      | 0                                                  | 0            | 0                     | 0    |
| <i>DND1</i>     | 1                       | 0                                      | 0                                      | 0                                                  | 0            | 0                     | 0    |
| <i>DNER</i>     | 0                       | 0                                      | 0                                      | 0                                                  | 0            | 1                     | 0    |
| <i>DNM3</i>     | 1                       | 0                                      | 0                                      | 0                                                  | 0            | 0                     | 0    |
| <i>DNMT3A</i>   | 1                       | 0                                      | 0                                      | 0                                                  | 0            | 0                     | 0    |
| <i>DNMT3B</i>   | 1                       | 0                                      | 0                                      | 0                                                  | 0            | 0                     | 0    |
| <i>DOCK11</i>   | 0                       | 0                                      | 0                                      | 0                                                  | 0            | 1                     | 0    |
| <i>DOCK7</i>    | 1                       | 0                                      | 0                                      | 0                                                  | 0            | 0                     | 0    |
| <i>DOCK9</i>    | 1                       | 0                                      | 0                                      | 0                                                  | 0            | 0                     | 0    |
| <i>DOK2</i>     | 1                       | 0                                      | 1                                      | 0                                                  | 0            | 0                     | 0    |
| <i>DPF3</i>     | 1                       | 0                                      | 1                                      | 1                                                  | 1            | 1                     | 0    |
| <i>DPP4</i>     | 0                       | 0                                      | 0                                      | 0                                                  | 0            | 1                     | 0    |
| <i>DPP6</i>     | 0                       | 0                                      | 0                                      | 0                                                  | 0            | 0                     | 1    |
| <i>DPT</i>      | 0                       | 0                                      | 0                                      | 0                                                  | 0            | 1                     | 0    |
| <i>DPYS</i>     | 0                       | 0                                      | 0                                      | 0                                                  | 0            | 1                     | 0    |
| <i>DPYSL4</i>   | 0                       | 0                                      | 0                                      | 0                                                  | 0            | 1                     | 0    |
| <i>DRRS</i>     | 0                       | 0                                      | 0                                      | 0                                                  | 0            | 0                     | 1    |
| <i>DSC1</i>     | 1                       | 0                                      | 0                                      | 0                                                  | 0            | 0                     | 0    |
| <i>DSC2</i>     | 0                       | 0                                      | 0                                      | 0                                                  | 0            | 0                     | 1    |

| Gene          | Multi-omics integration | Gene-based result from AFGen 2017 GWAS | Gene-based result from AFGen 2018 GWAS | Meta-analysis of SNPs by two large AF GWAS in 2018 | GWAS catalog | Open Targets Platform | OMIM |
|---------------|-------------------------|----------------------------------------|----------------------------------------|----------------------------------------------------|--------------|-----------------------|------|
| <i>DSC3</i>   | 1                       | 0                                      | 0                                      | 0                                                  | 0            | 0                     | 0    |
| <i>DSE</i>    | 0                       | 0                                      | 0                                      | 0                                                  | 0            | 1                     | 0    |
| <i>DSG3</i>   | 0                       | 0                                      | 0                                      | 0                                                  | 0            | 1                     | 0    |
| <i>DSMA5</i>  | 0                       | 0                                      | 0                                      | 0                                                  | 0            | 0                     | 1    |
| <i>DST</i>    | 1                       | 0                                      | 0                                      | 0                                                  | 0            | 1                     | 0    |
| <i>DSTYK</i>  | 1                       | 0                                      | 0                                      | 0                                                  | 0            | 0                     | 0    |
| <i>DTGA1</i>  | 0                       | 0                                      | 0                                      | 0                                                  | 0            | 0                     | 1    |
| <i>DTNA</i>   | 1                       | 0                                      | 0                                      | 0                                                  | 0            | 0                     | 0    |
| <i>DTNB</i>   | 1                       | 0                                      | 0                                      | 0                                                  | 0            | 0                     | 0    |
| <i>DUS4L</i>  | 1                       | 0                                      | 1                                      | 0                                                  | 0            | 0                     | 0    |
| <i>DUSP11</i> | 1                       | 0                                      | 0                                      | 0                                                  | 0            | 0                     | 0    |
| <i>DUSP13</i> | 1                       | 0                                      | 0                                      | 0                                                  | 0            | 0                     | 0    |
| <i>DYSF</i>   | 1                       | 0                                      | 0                                      | 0                                                  | 0            | 0                     | 0    |
| <i>E4F1</i>   | 1                       | 0                                      | 0                                      | 0                                                  | 1            | 0                     | 0    |
| <i>EBF1</i>   | 1                       | 0                                      | 0                                      | 0                                                  | 0            | 0                     | 1    |
| <i>EBPL</i>   | 1                       | 0                                      | 0                                      | 0                                                  | 0            | 0                     | 0    |
| <i>ECCL</i>   | 0                       | 0                                      | 0                                      | 0                                                  | 0            | 0                     | 1    |
| <i>ECE1</i>   | 1                       | 0                                      | 0                                      | 0                                                  | 0            | 0                     | 0    |
| <i>ECE2</i>   | 1                       | 0                                      | 0                                      | 0                                                  | 0            | 0                     | 0    |
| <i>ECSIT</i>  | 1                       | 0                                      | 0                                      | 0                                                  | 0            | 0                     | 0    |
| <i>ECT2</i>   | 1                       | 0                                      | 0                                      | 0                                                  | 0            | 0                     | 0    |
| <i>EDMD1</i>  | 0                       | 0                                      | 0                                      | 0                                                  | 0            | 0                     | 1    |
| <i>EDMD2</i>  | 0                       | 0                                      | 0                                      | 0                                                  | 0            | 0                     | 1    |
| <i>EDMD3</i>  | 0                       | 0                                      | 0                                      | 0                                                  | 0            | 0                     | 1    |
| <i>EDMD7</i>  | 0                       | 0                                      | 0                                      | 0                                                  | 0            | 0                     | 1    |
| <i>EDN1</i>   | 0                       | 0                                      | 0                                      | 0                                                  | 0            | 1                     | 0    |
| <i>EDN2</i>   | 0                       | 0                                      | 0                                      | 0                                                  | 0            | 1                     | 0    |
| <i>EDNRA</i>  | 0                       | 0                                      | 0                                      | 0                                                  | 0            | 1                     | 0    |
| <i>EDSCV</i>  | 0                       | 0                                      | 0                                      | 0                                                  | 0            | 0                     | 1    |
| <i>EDSMC1</i> | 0                       | 0                                      | 0                                      | 0                                                  | 0            | 0                     | 1    |
| <i>EEF1A1</i> | 1                       | 0                                      | 0                                      | 0                                                  | 0            | 0                     | 0    |
| <i>EEF2</i>   | 0                       | 0                                      | 0                                      | 0                                                  | 0            | 1                     | 0    |
| <i>EEFSEC</i> | 1                       | 0                                      | 0                                      | 0                                                  | 0            | 0                     | 0    |
| <i>EFCAB2</i> | 1                       | 0                                      | 0                                      | 0                                                  | 0            | 0                     | 0    |
| <i>EFHC1</i>  | 1                       | 0                                      | 0                                      | 0                                                  | 0            | 0                     | 0    |
| <i>EFNA1</i>  | 1                       | 0                                      | 0                                      | 0                                                  | 0            | 0                     | 0    |
| <i>EFNA3</i>  | 1                       | 0                                      | 1                                      | 0                                                  | 0            | 0                     | 0    |
| <i>EFNA4</i>  | 1                       | 0                                      | 1                                      | 0                                                  | 0            | 0                     | 0    |
| <i>EFNA5</i>  | 1                       | 0                                      | 0                                      | 0                                                  | 0            | 1                     | 0    |
| <i>EFNB3</i>  | 1                       | 0                                      | 0                                      | 0                                                  | 0            | 0                     | 0    |
| <i>EFR3B</i>  | 1                       | 0                                      | 0                                      | 0                                                  | 0            | 0                     | 0    |
| <i>EFS</i>    | 0                       | 0                                      | 1                                      | 0                                                  | 0            | 0                     | 0    |
| <i>EFTUD2</i> | 1                       | 0                                      | 0                                      | 0                                                  | 0            | 0                     | 0    |
| <i>EGR1</i>   | 1                       | 0                                      | 1                                      | 0                                                  | 0            | 0                     | 0    |

| Gene           | Multi-omics integration | Gene-based result from AFGen 2017 GWAS | Gene-based result from AFGen 2018 GWAS | Meta-analysis of SNPs by two large AF GWAS in 2018 | GWAS catalog | Open Targets Platform | OMIM |
|----------------|-------------------------|----------------------------------------|----------------------------------------|----------------------------------------------------|--------------|-----------------------|------|
| <i>EGR3</i>    | 1                       | 0                                      | 0                                      | 0                                                  | 0            | 0                     | 0    |
| <i>EHD4</i>    | 1                       | 0                                      | 0                                      | 0                                                  | 0            | 0                     | 0    |
| <i>EHF</i>     | 0                       | 0                                      | 0                                      | 0                                                  | 0            | 1                     | 0    |
| <i>EHMT2</i>   | 1                       | 0                                      | 0                                      | 0                                                  | 0            | 0                     | 0    |
| <i>EIF1B</i>   | 1                       | 0                                      | 0                                      | 0                                                  | 0            | 0                     | 0    |
| <i>EIF2AK2</i> | 1                       | 0                                      | 0                                      | 0                                                  | 0            | 0                     | 0    |
| <i>EIF3A</i>   | 1                       | 0                                      | 0                                      | 0                                                  | 0            | 0                     | 0    |
| <i>EIF4A1</i>  | 1                       | 0                                      | 1                                      | 0                                                  | 0            | 0                     | 0    |
| <i>EIF5A</i>   | 1                       | 0                                      | 0                                      | 0                                                  | 0            | 0                     | 0    |
| <i>ELAC1</i>   | 1                       | 0                                      | 0                                      | 0                                                  | 0            | 0                     | 0    |
| <i>ELAVL3</i>  | 1                       | 0                                      | 0                                      | 0                                                  | 0            | 0                     | 0    |
| <i>ELN</i>     | 1                       | 0                                      | 0                                      | 0                                                  | 0            | 1                     | 0    |
| <i>ELOVL3</i>  | 1                       | 0                                      | 1                                      | 0                                                  | 1            | 1                     | 0    |
| <i>EMB</i>     | 0                       | 0                                      | 0                                      | 0                                                  | 0            | 1                     | 0    |
| <i>EMD</i>     | 0                       | 0                                      | 0                                      | 0                                                  | 0            | 1                     | 1    |
| <i>EMP1</i>    | 0                       | 0                                      | 0                                      | 0                                                  | 0            | 1                     | 0    |
| <i>EMP2</i>    | 1                       | 0                                      | 0                                      | 0                                                  | 0            | 0                     | 0    |
| <i>ENG</i>     | 1                       | 0                                      | 0                                      | 0                                                  | 0            | 1                     | 0    |
| <i>ENHO</i>    | 0                       | 0                                      | 0                                      | 0                                                  | 0            | 1                     | 0    |
| <i>ENO2</i>    | 0                       | 0                                      | 0                                      | 0                                                  | 0            | 1                     | 0    |
| <i>ENO3</i>    | 0                       | 0                                      | 0                                      | 0                                                  | 0            | 1                     | 0    |
| <i>ENPEP</i>   | 1                       | 1                                      | 1                                      | 0                                                  | 1            | 1                     | 0    |
| <i>ENPP2</i>   | 1                       | 0                                      | 0                                      | 0                                                  | 0            | 0                     | 0    |
| <i>ENTPD5</i>  | 1                       | 0                                      | 0                                      | 0                                                  | 0            | 0                     | 0    |
| <i>EOGT</i>    | 0                       | 0                                      | 0                                      | 0                                                  | 0            | 0                     | 1    |
| <i>EPAS1</i>   | 0                       | 0                                      | 0                                      | 1                                                  | 0            | 0                     | 0    |
| <i>EPHA3</i>   | 1                       | 0                                      | 1                                      | 1                                                  | 1            | 1                     | 0    |
| <i>EPHB2</i>   | 0                       | 0                                      | 0                                      | 0                                                  | 0            | 1                     | 0    |
| <i>EPHB4</i>   | 0                       | 0                                      | 0                                      | 0                                                  | 0            | 0                     | 1    |
| <i>EPHX2</i>   | 0                       | 0                                      | 0                                      | 0                                                  | 0            | 1                     | 0    |
| <i>EPM2A</i>   | 1                       | 0                                      | 0                                      | 0                                                  | 0            | 0                     | 0    |
| <i>EPO</i>     | 1                       | 0                                      | 0                                      | 0                                                  | 0            | 1                     | 0    |
| <i>EPS15</i>   | 1                       | 0                                      | 1                                      | 0                                                  | 0            | 0                     | 0    |
| <i>ERAP2</i>   | 1                       | 0                                      | 0                                      | 0                                                  | 0            | 0                     | 0    |
| <i>ERAS</i>    | 0                       | 0                                      | 0                                      | 0                                                  | 0            | 1                     | 0    |
| <i>ERBB2</i>   | 0                       | 0                                      | 1                                      | 0                                                  | 0            | 1                     | 0    |
| <i>ERBB4</i>   | 1                       | 0                                      | 0                                      | 1                                                  | 1            | 1                     | 0    |
| <i>ERC2</i>    | 1                       | 0                                      | 0                                      | 0                                                  | 0            | 0                     | 0    |
| <i>ERCC4</i>   | 1                       | 0                                      | 0                                      | 0                                                  | 0            | 0                     | 0    |
| <i>ERCC6</i>   | 0                       | 0                                      | 0                                      | 0                                                  | 0            | 1                     | 0    |
| <i>ERCC8</i>   | 0                       | 0                                      | 0                                      | 0                                                  | 0            | 1                     | 0    |
| <i>ERF</i>     | 1                       | 0                                      | 0                                      | 0                                                  | 0            | 0                     | 0    |
| <i>ERGIC1</i>  | 1                       | 0                                      | 0                                      | 0                                                  | 0            | 0                     | 0    |
| <i>ERI2</i>    | 1                       | 0                                      | 0                                      | 0                                                  | 0            | 0                     | 0    |



| Gene            | Multi-omics integration | Gene-based result from AFGen 2017 GWAS | Gene-based result from AFGen 2018 GWAS | Meta-analysis of SNPs by two large AF GWAS in 2018 | GWAS catalog | Open Targets Platform | OMIM |
|-----------------|-------------------------|----------------------------------------|----------------------------------------|----------------------------------------------------|--------------|-----------------------|------|
| <i>ERLIN2</i>   | 1                       | 0                                      | 0                                      | 0                                                  | 0            | 0                     | 0    |
| <i>ERP44</i>    | 1                       | 0                                      | 0                                      | 0                                                  | 0            | 0                     | 0    |
| <i>ESD</i>      | 0                       | 0                                      | 0                                      | 0                                                  | 0            | 1                     | 0    |
| <i>ESPN</i>     | 1                       | 0                                      | 0                                      | 0                                                  | 0            | 0                     | 0    |
| <i>ESPNL</i>    | 1                       | 0                                      | 1                                      | 0                                                  | 0            | 0                     | 0    |
| <i>ESR1</i>     | 0                       | 0                                      | 0                                      | 0                                                  | 0            | 1                     | 0    |
| <i>ESR2</i>     | 1                       | 1                                      | 1                                      | 0                                                  | 0            | 1                     | 0    |
| <i>ESRRG</i>    | 0                       | 0                                      | 0                                      | 0                                                  | 0            | 1                     | 0    |
| <i>ETAA1</i>    | 1                       | 0                                      | 0                                      | 0                                                  | 0            | 0                     | 0    |
| <i>ETV3</i>     | 0                       | 0                                      | 0                                      | 0                                                  | 0            | 1                     | 0    |
| <i>ETV3L</i>    | 1                       | 0                                      | 0                                      | 0                                                  | 0            | 0                     | 0    |
| <i>EVC</i>      | 0                       | 0                                      | 0                                      | 0                                                  | 0            | 0                     | 1    |
| <i>EVC</i>      | 0                       | 0                                      | 0                                      | 0                                                  | 0            | 0                     | 1    |
| <i>EVC2</i>     | 1                       | 0                                      | 0                                      | 0                                                  | 0            | 0                     | 1    |
| <i>EVPLS</i>    | 0                       | 0                                      | 0                                      | 0                                                  | 0            | 0                     | 1    |
| <i>EVX1</i>     | 1                       | 0                                      | 0                                      | 0                                                  | 0            | 0                     | 0    |
| <i>EXD2</i>     | 1                       | 0                                      | 0                                      | 0                                                  | 0            | 0                     | 0    |
| <i>EXOSC3</i>   | 0                       | 0                                      | 0                                      | 0                                                  | 0            | 1                     | 0    |
| <i>EXT1</i>     | 0                       | 0                                      | 0                                      | 1                                                  | 0            | 0                     | 0    |
| <i>EYA4</i>     | 1                       | 0                                      | 0                                      | 0                                                  | 1            | 1                     | 0    |
| <i>EZH2</i>     | 1                       | 0                                      | 0                                      | 0                                                  | 0            | 0                     | 0    |
| <i>F10</i>      | 1                       | 0                                      | 0                                      | 0                                                  | 0            | 1                     | 0    |
| <i>F11</i>      | 0                       | 0                                      | 0                                      | 0                                                  | 0            | 1                     | 0    |
| <i>F11R</i>     | 0                       | 0                                      | 0                                      | 0                                                  | 0            | 1                     | 0    |
| <i>F2</i>       | 0                       | 0                                      | 0                                      | 0                                                  | 0            | 1                     | 0    |
| <i>F2R</i>      | 0                       | 0                                      | 0                                      | 0                                                  | 0            | 1                     | 0    |
| <i>F3</i>       | 0                       | 0                                      | 0                                      | 0                                                  | 0            | 1                     | 0    |
| <i>F8</i>       | 0                       | 0                                      | 0                                      | 0                                                  | 0            | 1                     | 0    |
| <i>FABP3</i>    | 0                       | 0                                      | 0                                      | 0                                                  | 0            | 1                     | 0    |
| <i>FABP4</i>    | 1                       | 0                                      | 0                                      | 0                                                  | 0            | 0                     | 0    |
| <i>FABP7</i>    | 1                       | 0                                      | 0                                      | 0                                                  | 0            | 0                     | 0    |
| <i>FADS1</i>    | 0                       | 0                                      | 0                                      | 0                                                  | 1            | 1                     | 0    |
| <i>FADS2</i>    | 0                       | 0                                      | 0                                      | 0                                                  | 0            | 1                     | 0    |
| <i>FAF1</i>     | 1                       | 0                                      | 0                                      | 0                                                  | 1            | 1                     | 0    |
| <i>FAHD1</i>    | 1                       | 0                                      | 0                                      | 0                                                  | 0            | 0                     | 0    |
| <i>FAM110A</i>  | 1                       | 0                                      | 0                                      | 0                                                  | 0            | 0                     | 0    |
| <i>FAM114A1</i> | 1                       | 0                                      | 0                                      | 0                                                  | 0            | 0                     | 0    |
| <i>FAM129A</i>  | 1                       | 0                                      | 0                                      | 0                                                  | 0            | 0                     | 0    |
| <i>FAM129B</i>  | 0                       | 0                                      | 0                                      | 0                                                  | 0            | 1                     | 0    |
| <i>FAM131A</i>  | 1                       | 0                                      | 0                                      | 0                                                  | 0            | 0                     | 0    |
| <i>FAM136A</i>  | 1                       | 0                                      | 0                                      | 0                                                  | 0            | 0                     | 0    |
| <i>FAM13B</i>   | 1                       | 1                                      | 1                                      | 0                                                  | 1            | 1                     | 0    |
| <i>FAM149B</i>  | 1                       | 0                                      | 0                                      | 0                                                  | 0            | 0                     | 0    |

| Gene                       | Multi-omics integration | Gene-based result from AFGen 2017 GWAS | Gene-based result from AFGen 2018 GWAS | Meta-analysis of SNPs by two large AF GWAS in 2018 | GWAS catalog | Open Targets Platform | OMIM |
|----------------------------|-------------------------|----------------------------------------|----------------------------------------|----------------------------------------------------|--------------|-----------------------|------|
| <i>I</i>                   |                         |                                        |                                        |                                                    |              |                       |      |
| <i>FAM160B</i><br><i>1</i> | 1                       | 0                                      | 0                                      | 0                                                  | 0            | 0                     | 0    |
| <i>FAM160B</i><br><i>2</i> | 1                       | 0                                      | 0                                      | 0                                                  | 0            | 0                     | 0    |
| <i>FAM162A</i>             | 1                       | 0                                      | 0                                      | 0                                                  | 0            | 0                     | 0    |
| <i>FAM173A</i>             | 1                       | 0                                      | 0                                      | 0                                                  | 0            | 0                     | 0    |
| <i>FAM173B</i>             | 1                       | 0                                      | 0                                      | 0                                                  | 0            | 0                     | 0    |
| <i>FAM186B</i>             | 1                       | 0                                      | 0                                      | 0                                                  | 0            | 0                     | 0    |
| <i>FAM187B</i>             | 1                       | 0                                      | 0                                      | 0                                                  | 0            | 0                     | 0    |
| <i>FAM189B</i>             | 1                       | 0                                      | 0                                      | 0                                                  | 0            | 0                     | 0    |
| <i>FAM43A</i>              | 1                       | 0                                      | 0                                      | 0                                                  | 0            | 0                     | 0    |
| <i>FAM47E</i>              | 1                       | 0                                      | 0                                      | 0                                                  | 0            | 0                     | 0    |
| <i>FAM49B</i>              | 1                       | 0                                      | 0                                      | 0                                                  | 0            | 0                     | 0    |
| <i>FAM53C</i>              | 1                       | 0                                      | 1                                      | 0                                                  | 0            | 0                     | 0    |
| <i>FAM83A</i>              | 1                       | 0                                      | 0                                      | 0                                                  | 0            | 0                     | 0    |
| <i>FAM83C</i>              | 1                       | 0                                      | 0                                      | 0                                                  | 0            | 0                     | 0    |
| <i>FAM89B</i>              | 1                       | 0                                      | 0                                      | 0                                                  | 0            | 0                     | 0    |
| <i>FANCC</i>               | 1                       | 0                                      | 1                                      | 0                                                  | 0            | 1                     | 0    |
| <i>FANCE</i>               | 1                       | 0                                      | 0                                      | 0                                                  | 0            | 0                     | 0    |
| <i>FANCI</i>               | 0                       | 0                                      | 0                                      | 0                                                  | 0            | 0                     | 1    |
| <i>FANCN</i>               | 0                       | 0                                      | 0                                      | 0                                                  | 0            | 0                     | 1    |
| <i>FARS2</i>               | 1                       | 0                                      | 0                                      | 0                                                  | 0            | 0                     | 0    |
| <i>FASLG</i>               | 0                       | 0                                      | 0                                      | 0                                                  | 0            | 1                     | 0    |
| <i>FBLN1</i>               | 0                       | 0                                      | 0                                      | 0                                                  | 0            | 1                     | 0    |
| <i>FBN1</i>                | 0                       | 0                                      | 0                                      | 0                                                  | 0            | 1                     | 0    |
| <i>FBN2</i>                | 1                       | 0                                      | 0                                      | 0                                                  | 0            | 0                     | 1    |
| <i>FBP1</i>                | 1                       | 0                                      | 0                                      | 0                                                  | 0            | 0                     | 0    |
| <i>FBP2</i>                | 1                       | 0                                      | 0                                      | 0                                                  | 0            | 0                     | 0    |
| <i>FBRSL1</i>              | 1                       | 0                                      | 0                                      | 1                                                  | 1            | 0                     | 0    |
| <i>FBXL16</i>              | 1                       | 0                                      | 0                                      | 0                                                  | 0            | 0                     | 0    |
| <i>FBXL2</i>               | 1                       | 0                                      | 0                                      | 0                                                  | 0            | 0                     | 0    |
| <i>FBXL20</i>              | 1                       | 0                                      | 0                                      | 0                                                  | 0            | 0                     | 0    |
| <i>FBXL22</i>              | 1                       | 0                                      | 0                                      | 0                                                  | 0            | 0                     | 0    |
| <i>FBXO11</i>              | 1                       | 0                                      | 0                                      | 0                                                  | 0            | 0                     | 0    |
| <i>FBXO16</i>              | 1                       | 0                                      | 0                                      | 0                                                  | 0            | 0                     | 0    |
| <i>FBXO30</i>              | 1                       | 0                                      | 0                                      | 0                                                  | 0            | 0                     | 0    |
| <i>FBXO32</i>              | 1                       | 1                                      | 1                                      | 1                                                  | 1            | 1                     | 0    |
| <i>FBXO9</i>               | 1                       | 0                                      | 0                                      | 0                                                  | 0            | 0                     | 0    |
| <i>FBXW11</i>              | 0                       | 0                                      | 0                                      | 0                                                  | 0            | 1                     | 0    |
| <i>FBXW4</i>               | 1                       | 0                                      | 1                                      | 0                                                  | 0            | 0                     | 0    |
| <i>FCAMR</i>               | 1                       | 0                                      | 0                                      | 0                                                  | 0            | 0                     | 0    |
| <i>FCGR1A</i>              | 1                       | 0                                      | 0                                      | 0                                                  | 0            | 0                     | 0    |
| <i>FCRLB</i>               | 1                       | 0                                      | 0                                      | 0                                                  | 0            | 0                     | 0    |

| Gene          | Multi-omics integration | Gene-based result from AFGen 2017 GWAS | Gene-based result from AFGen 2018 GWAS | Meta-analysis of SNPs by two large AF GWAS in 2018 | GWAS catalog | Open Targets Platform | OMIM |
|---------------|-------------------------|----------------------------------------|----------------------------------------|----------------------------------------------------|--------------|-----------------------|------|
| <i>FDFT1</i>  | 1                       | 0                                      | 0                                      | 0                                                  | 0            | 0                     | 0    |
| <i>FDPS</i>   | 1                       | 0                                      | 0                                      | 0                                                  | 0            | 0                     | 0    |
| <i>FER</i>    | 1                       | 0                                      | 0                                      | 0                                                  | 0            | 0                     | 0    |
| <i>FER1L4</i> | 0                       | 0                                      | 0                                      | 0                                                  | 0            | 1                     | 0    |
| <i>FERD3L</i> | 0                       | 0                                      | 0                                      | 0                                                  | 1            | 1                     | 0    |
| <i>FES</i>    | 1                       | 0                                      | 0                                      | 0                                                  | 0            | 0                     | 0    |
| <i>FEV</i>    | 0                       | 0                                      | 0                                      | 0                                                  | 0            | 1                     | 0    |
| <i>FGD5</i>   | 1                       | 0                                      | 0                                      | 0                                                  | 0            | 0                     | 0    |
| <i>FGF11</i>  | 1                       | 0                                      | 1                                      | 0                                                  | 0            | 0                     | 0    |
| <i>FGF16</i>  | 0                       | 0                                      | 0                                      | 0                                                  | 0            | 1                     | 0    |
| <i>FGF17</i>  | 1                       | 0                                      | 0                                      | 0                                                  | 0            | 0                     | 0    |
| <i>FGF18</i>  | 1                       | 0                                      | 0                                      | 0                                                  | 0            | 0                     | 0    |
| <i>FGF2</i>   | 0                       | 0                                      | 0                                      | 0                                                  | 0            | 1                     | 0    |
| <i>FGF21</i>  | 0                       | 0                                      | 0                                      | 0                                                  | 0            | 1                     | 0    |
| <i>FGF23</i>  | 0                       | 0                                      | 0                                      | 0                                                  | 0            | 1                     | 0    |
| <i>FGF3</i>   | 1                       | 0                                      | 0                                      | 0                                                  | 0            | 0                     | 0    |
| <i>FGF4</i>   | 1                       | 0                                      | 0                                      | 0                                                  | 0            | 0                     | 0    |
| <i>FGF5</i>   | 1                       | 0                                      | 0                                      | 1                                                  | 1            | 1                     | 0    |
| <i>FGF7</i>   | 1                       | 0                                      | 0                                      | 0                                                  | 0            | 0                     | 0    |
| <i>FGF8</i>   | 1                       | 0                                      | 0                                      | 0                                                  | 0            | 0                     | 0    |
| <i>FGF9</i>   | 1                       | 0                                      | 0                                      | 0                                                  | 0            | 0                     | 0    |
| <i>FGFR4</i>  | 0                       | 0                                      | 0                                      | 0                                                  | 0            | 1                     | 0    |
| <i>FGFRL1</i> | 1                       | 0                                      | 0                                      | 0                                                  | 0            | 0                     | 0    |
| <i>FGL1</i>   | 1                       | 0                                      | 1                                      | 0                                                  | 0            | 0                     | 0    |
| <i>FHL1</i>   | 0                       | 0                                      | 0                                      | 0                                                  | 0            | 1                     | 1    |
| <i>FHL2</i>   | 1                       | 0                                      | 0                                      | 0                                                  | 0            | 0                     | 0    |
| <i>FIG4</i>   | 1                       | 0                                      | 0                                      | 0                                                  | 0            | 0                     | 0    |
| <i>FIGN</i>   | 1                       | 0                                      | 0                                      | 0                                                  | 0            | 0                     | 0    |
| <i>FILIP1</i> | 1                       | 0                                      | 0                                      | 1                                                  | 0            | 0                     | 0    |
| <i>FITM2</i>  | 1                       | 0                                      | 0                                      | 0                                                  | 0            | 0                     | 0    |
| <i>FKBP1B</i> | 0                       | 0                                      | 0                                      | 0                                                  | 0            | 1                     | 0    |
| <i>FKBP7</i>  | 1                       | 0                                      | 1                                      | 0                                                  | 0            | 0                     | 0    |
| <i>FKBP9</i>  | 1                       | 0                                      | 0                                      | 0                                                  | 0            | 0                     | 0    |
| <i>FKBPL</i>  | 1                       | 0                                      | 0                                      | 0                                                  | 0            | 0                     | 0    |
| <i>FLAD1</i>  | 1                       | 1                                      | 1                                      | 0                                                  | 0            | 0                     | 0    |
| <i>FLHS</i>   | 0                       | 0                                      | 0                                      | 0                                                  | 0            | 0                     | 1    |
| <i>FLII</i>   | 1                       | 0                                      | 0                                      | 0                                                  | 0            | 0                     | 0    |
| <i>FLNA</i>   | 0                       | 0                                      | 0                                      | 0                                                  | 0            | 0                     | 1    |
| <i>FLNB</i>   | 1                       | 0                                      | 0                                      | 0                                                  | 0            | 0                     | 0    |
| <i>FLNC</i>   | 1                       | 0                                      | 0                                      | 0                                                  | 0            | 0                     | 1    |
| <i>FLOT2</i>  | 0                       | 0                                      | 0                                      | 0                                                  | 0            | 1                     | 0    |
| <i>FLPIS</i>  | 0                       | 0                                      | 0                                      | 0                                                  | 0            | 0                     | 1    |
| <i>FLT1</i>   | 1                       | 0                                      | 0                                      | 0                                                  | 0            | 0                     | 0    |
| <i>FNI</i>    | 0                       | 0                                      | 0                                      | 0                                                  | 0            | 1                     | 0    |

| Gene           | Multi-omics integration | Gene-based result from AFGen 2017 GWAS | Gene-based result from AFGen 2018 GWAS | Meta-analysis of SNPs by two large AF GWAS in 2018 | GWAS catalog | Open Targets Platform | OMIM |
|----------------|-------------------------|----------------------------------------|----------------------------------------|----------------------------------------------------|--------------|-----------------------|------|
| <i>FN3KRP</i>  | 1                       | 0                                      | 0                                      | 0                                                  | 0            | 0                     | 0    |
| <i>FND1</i>    | 0                       | 0                                      | 0                                      | 0                                                  | 0            | 0                     | 1    |
| <i>FNDC3B</i>  | 1                       | 0                                      | 0                                      | 0                                                  | 0            | 0                     | 0    |
| <i>FOXA3</i>   | 1                       | 0                                      | 0                                      | 0                                                  | 0            | 0                     | 0    |
| <i>FOXC1</i>   | 1                       | 0                                      | 0                                      | 0                                                  | 0            | 0                     | 1    |
| <i>FOXE1</i>   | 1                       | 0                                      | 0                                      | 0                                                  | 0            | 1                     | 0    |
| <i>FOXF2</i>   | 0                       | 0                                      | 0                                      | 0                                                  | 0            | 1                     | 0    |
| <i>FOXO3</i>   | 0                       | 0                                      | 0                                      | 0                                                  | 0            | 1                     | 0    |
| <i>FOXP4</i>   | 1                       | 0                                      | 0                                      | 0                                                  | 0            | 0                     | 0    |
| <i>FPGS</i>    | 1                       | 0                                      | 0                                      | 0                                                  | 0            | 0                     | 0    |
| <i>FPS</i>     | 0                       | 0                                      | 0                                      | 0                                                  | 0            | 0                     | 1    |
| <i>FRAT1</i>   | 1                       | 0                                      | 0                                      | 0                                                  | 0            | 0                     | 0    |
| <i>FRAT2</i>   | 1                       | 0                                      | 0                                      | 0                                                  | 0            | 0                     | 0    |
| <i>FRMD4A</i>  | 1                       | 0                                      | 0                                      | 0                                                  | 0            | 0                     | 0    |
| <i>FRMD4B</i>  | 0                       | 0                                      | 0                                      | 1                                                  | 1            | 0                     | 0    |
| <i>FRMD6</i>   | 1                       | 0                                      | 0                                      | 0                                                  | 0            | 0                     | 0    |
| <i>FRMD8</i>   | 1                       | 0                                      | 0                                      | 0                                                  | 0            | 0                     | 0    |
| <i>FRNS</i>    | 0                       | 0                                      | 0                                      | 0                                                  | 0            | 0                     | 1    |
| <i>FRS2</i>    | 1                       | 0                                      | 1                                      | 0                                                  | 0            | 0                     | 0    |
| <i>FSHD1</i>   | 0                       | 0                                      | 0                                      | 0                                                  | 0            | 0                     | 1    |
| <i>FTDALS3</i> | 0                       | 0                                      | 0                                      | 0                                                  | 0            | 0                     | 1    |
| <i>FTDALS4</i> | 0                       | 0                                      | 0                                      | 0                                                  | 0            | 0                     | 1    |
| <i>FTO</i>     | 1                       | 0                                      | 0                                      | 0                                                  | 1            | 1                     | 0    |
| <i>FUCA1</i>   | 1                       | 0                                      | 0                                      | 0                                                  | 0            | 0                     | 0    |
| <i>FURIN</i>   | 1                       | 0                                      | 0                                      | 0                                                  | 0            | 0                     | 0    |
| <i>FUT8</i>    | 1                       | 0                                      | 0                                      | 0                                                  | 0            | 0                     | 0    |
| <i>FXN</i>     | 1                       | 0                                      | 0                                      | 0                                                  | 0            | 0                     | 0    |
| <i>FXR2</i>    | 1                       | 0                                      | 1                                      | 0                                                  | 0            | 0                     | 0    |
| <i>FXYP2</i>   | 0                       | 0                                      | 0                                      | 0                                                  | 0            | 1                     | 0    |
| <i>FXYP4</i>   | 1                       | 0                                      | 0                                      | 0                                                  | 0            | 0                     | 0    |
| <i>FXYP5</i>   | 1                       | 0                                      | 0                                      | 0                                                  | 0            | 0                     | 0    |
| <i>FZD2</i>    | 0                       | 0                                      | 0                                      | 0                                                  | 0            | 0                     | 1    |
| <i>G3BP2</i>   | 1                       | 0                                      | 0                                      | 0                                                  | 0            | 0                     | 0    |
| <i>G6PC3</i>   | 0                       | 0                                      | 0                                      | 0                                                  | 0            | 0                     | 1    |
| <i>GAB2</i>    | 1                       | 0                                      | 0                                      | 0                                                  | 0            | 0                     | 0    |
| <i>GABPA</i>   | 1                       | 0                                      | 0                                      | 0                                                  | 0            | 0                     | 0    |
| <i>GABPB1</i>  | 1                       | 0                                      | 0                                      | 0                                                  | 0            | 0                     | 0    |
| <i>GABRA5</i>  | 1                       | 0                                      | 0                                      | 0                                                  | 0            | 0                     | 0    |
| <i>GABRA6</i>  | 1                       | 0                                      | 0                                      | 0                                                  | 0            | 0                     | 0    |
| <i>GABRG3</i>  | 1                       | 0                                      | 0                                      | 0                                                  | 0            | 0                     | 0    |
| <i>GADD45</i>  | 1                       | 0                                      | 0                                      | 0                                                  | 0            | 0                     | 0    |
| <i>GIP1</i>    | 1                       | 0                                      | 0                                      | 0                                                  | 0            | 0                     | 0    |
| <i>GAL</i>     | 0                       | 0                                      | 0                                      | 0                                                  | 0            | 1                     | 0    |
| <i>GALE</i>    | 1                       | 0                                      | 0                                      | 0                                                  | 0            | 0                     | 0    |

| Gene           | Multi-omics integration | Gene-based result from AFGen 2017 GWAS | Gene-based result from AFGen 2018 GWAS | Meta-analysis of SNPs by two large AF GWAS in 2018 | GWAS catalog | Open Targets Platform | OMIM |
|----------------|-------------------------|----------------------------------------|----------------------------------------|----------------------------------------------------|--------------|-----------------------|------|
| <i>GALK2</i>   | 1                       | 0                                      | 0                                      | 0                                                  | 0            | 0                     | 0    |
| <i>GALNT12</i> | 1                       | 0                                      | 0                                      | 0                                                  | 0            | 0                     | 0    |
| <i>GAP43</i>   | 0                       | 0                                      | 0                                      | 0                                                  | 0            | 1                     | 0    |
| <i>GAPDH</i>   | 0                       | 0                                      | 0                                      | 0                                                  | 0            | 1                     | 0    |
| <i>GATA4</i>   | 1                       | 0                                      | 0                                      | 1                                                  | 0            | 1                     | 1    |
| <i>GATA5</i>   | 1                       | 0                                      | 0                                      | 0                                                  | 0            | 1                     | 1    |
| <i>GATA6</i>   | 0                       | 0                                      | 0                                      | 0                                                  | 0            | 1                     | 1    |
| <i>GBA</i>     | 1                       | 0                                      | 0                                      | 0                                                  | 0            | 0                     | 0    |
| <i>GBBB2</i>   | 0                       | 0                                      | 0                                      | 0                                                  | 0            | 0                     | 1    |
| <i>GBF1</i>    | 1                       | 0                                      | 1                                      | 0                                                  | 0            | 0                     | 0    |
| <i>GCAT</i>    | 1                       | 0                                      | 0                                      | 0                                                  | 0            | 0                     | 0    |
| <i>GCKR</i>    | 0                       | 0                                      | 0                                      | 0                                                  | 1            | 1                     | 0    |
| <i>GCLC</i>    | 1                       | 0                                      | 0                                      | 0                                                  | 0            | 0                     | 0    |
| <i>GCOM1</i>   | 0                       | 0                                      | 0                                      | 1                                                  | 1            | 0                     | 0    |
| <i>GCSH</i>    | 0                       | 0                                      | 0                                      | 0                                                  | 0            | 1                     | 0    |
| <i>GDF1</i>    | 0                       | 0                                      | 0                                      | 0                                                  | 0            | 0                     | 1    |
| <i>GDF15</i>   | 0                       | 0                                      | 0                                      | 0                                                  | 0            | 1                     | 0    |
| <i>GDF5</i>    | 1                       | 0                                      | 0                                      | 0                                                  | 0            | 0                     | 0    |
| <i>GDF6</i>    | 1                       | 0                                      | 0                                      | 0                                                  | 0            | 0                     | 1    |
| <i>GDI2</i>    | 1                       | 0                                      | 0                                      | 0                                                  | 0            | 0                     | 0    |
| <i>GDPD3</i>   | 1                       | 0                                      | 0                                      | 0                                                  | 0            | 0                     | 0    |
| <i>GET4</i>    | 0                       | 0                                      | 0                                      | 0                                                  | 0            | 1                     | 0    |
| <i>GFAP</i>    | 1                       | 0                                      | 0                                      | 0                                                  | 0            | 0                     | 0    |
| <i>GFER</i>    | 1                       | 0                                      | 0                                      | 0                                                  | 0            | 0                     | 0    |
| <i>GFRA3</i>   | 1                       | 0                                      | 1                                      | 0                                                  | 0            | 0                     | 0    |
| <i>GGCX</i>    | 0                       | 0                                      | 0                                      | 0                                                  | 0            | 1                     | 0    |
| <i>GHR</i>     | 1                       | 0                                      | 0                                      | 0                                                  | 0            | 1                     | 0    |
| <i>GIGYF1</i>  | 1                       | 0                                      | 0                                      | 0                                                  | 0            | 0                     | 0    |
| <i>GIGYF2</i>  | 1                       | 0                                      | 0                                      | 0                                                  | 0            | 0                     | 0    |
| <i>GIMAP1</i>  | 1                       | 0                                      | 0                                      | 0                                                  | 0            | 0                     | 0    |
| <i>GIMAP2</i>  | 1                       | 0                                      | 0                                      | 0                                                  | 0            | 0                     | 0    |
| <i>GIMAP6</i>  | 1                       | 0                                      | 0                                      | 0                                                  | 0            | 0                     | 0    |
| <i>GIMAP7</i>  | 1                       | 0                                      | 0                                      | 0                                                  | 0            | 0                     | 0    |
| <i>GIPC1</i>   | 1                       | 0                                      | 0                                      | 0                                                  | 0            | 0                     | 0    |
| <i>GIPR</i>    | 1                       | 0                                      | 0                                      | 0                                                  | 0            | 0                     | 0    |
| <i>GIT2</i>    | 1                       | 0                                      | 0                                      | 0                                                  | 0            | 0                     | 0    |
| <i>GJA1</i>    | 1                       | 0                                      | 0                                      | 0                                                  | 0            | 1                     | 0    |
| <i>GJA4</i>    | 0                       | 0                                      | 0                                      | 0                                                  | 0            | 1                     | 0    |
| <i>GJA5</i>    | 1                       | 0                                      | 1                                      | 1                                                  | 1            | 1                     | 1    |
| <i>GJB7</i>    | 0                       | 0                                      | 1                                      | 0                                                  | 0            | 0                     | 0    |
| <i>GJC1</i>    | 0                       | 0                                      | 0                                      | 0                                                  | 0            | 1                     | 0    |
| <i>GJC2</i>    | 1                       | 0                                      | 0                                      | 0                                                  | 0            | 0                     | 0    |
| <i>GJC3</i>    | 0                       | 0                                      | 0                                      | 0                                                  | 0            | 1                     | 0    |
| <i>GJD2</i>    | 1                       | 0                                      | 0                                      | 0                                                  | 0            | 0                     | 0    |

| Gene           | Multi-omics integration | Gene-based result from AFGen 2017 GWAS | Gene-based result from AFGen 2018 GWAS | Meta-analysis of SNPs by two large AF GWAS in 2018 | GWAS catalog | Open Targets Platform | OMIM |
|----------------|-------------------------|----------------------------------------|----------------------------------------|----------------------------------------------------|--------------|-----------------------|------|
| <i>GJD3</i>    | 0                       | 0                                      | 0                                      | 0                                                  | 0            | 0                     | 1    |
| <i>GLA</i>     | 0                       | 0                                      | 0                                      | 0                                                  | 0            | 0                     | 1    |
| <i>GLB1</i>    | 1                       | 0                                      | 0                                      | 0                                                  | 0            | 1                     | 0    |
| <i>GLB1L3</i>  | 1                       | 0                                      | 0                                      | 0                                                  | 0            | 0                     | 0    |
| <i>GLC1A</i>   | 0                       | 0                                      | 0                                      | 0                                                  | 0            | 0                     | 1    |
| <i>GLCE</i>    | 1                       | 0                                      | 0                                      | 0                                                  | 0            | 0                     | 0    |
| <i>GLP1R</i>   | 0                       | 0                                      | 0                                      | 0                                                  | 0            | 1                     | 0    |
| <i>GLTSCR1</i> | 0                       | 0                                      | 0                                      | 1                                                  | 0            | 0                     | 0    |
| <i>GLUL</i>    | 1                       | 0                                      | 0                                      | 0                                                  | 0            | 0                     | 0    |
| <i>GMCL1</i>   | 0                       | 1                                      | 1                                      | 1                                                  | 1            | 1                     | 0    |
| <i>GMPR</i>    | 1                       | 0                                      | 0                                      | 0                                                  | 0            | 0                     | 0    |
| <i>GNAI2</i>   | 1                       | 0                                      | 0                                      | 0                                                  | 0            | 0                     | 1    |
| <i>GNAI3</i>   | 0                       | 0                                      | 0                                      | 0                                                  | 0            | 0                     | 1    |
| <i>GNAO1</i>   | 0                       | 0                                      | 0                                      | 0                                                  | 0            | 0                     | 1    |
| <i>GNAS</i>    | 1                       | 0                                      | 0                                      | 0                                                  | 0            | 0                     | 0    |
| <i>GNB1</i>    | 1                       | 0                                      | 0                                      | 0                                                  | 0            | 0                     | 0    |
| <i>GNB2</i>    | 1                       | 0                                      | 0                                      | 0                                                  | 0            | 0                     | 0    |
| <i>GNB3</i>    | 0                       | 0                                      | 0                                      | 0                                                  | 0            | 1                     | 0    |
| <i>GNB4</i>    | 1                       | 0                                      | 0                                      | 1                                                  | 1            | 1                     | 0    |
| <i>GNPNAT1</i> | 1                       | 0                                      | 0                                      | 0                                                  | 0            | 0                     | 0    |
| <i>GOLT1A</i>  | 1                       | 0                                      | 0                                      | 0                                                  | 0            | 0                     | 0    |
| <i>GON4L</i>   | 1                       | 0                                      | 0                                      | 0                                                  | 0            | 0                     | 0    |
| <i>GOPC</i>    | 1                       | 0                                      | 0                                      | 0                                                  | 0            | 0                     | 0    |
| <i>GORAB</i>   | 0                       | 0                                      | 1                                      | 0                                                  | 1            | 0                     | 0    |
| <i>GOSR2</i>   | 0                       | 0                                      | 0                                      | 0                                                  | 1            | 1                     | 0    |
| <i>GOT2</i>    | 0                       | 0                                      | 0                                      | 0                                                  | 0            | 1                     | 0    |
| <i>GP6</i>     | 0                       | 0                                      | 0                                      | 0                                                  | 0            | 1                     | 0    |
| <i>GPD1L</i>   | 0                       | 0                                      | 0                                      | 0                                                  | 0            | 1                     | 0    |
| <i>GPD2</i>    | 0                       | 0                                      | 0                                      | 0                                                  | 0            | 1                     | 0    |
| <i>GPI</i>     | 0                       | 0                                      | 0                                      | 0                                                  | 0            | 1                     | 0    |
| <i>GPR14</i>   | 0                       | 0                                      | 0                                      | 0                                                  | 0            | 0                     | 1    |
| <i>GPR15</i>   | 1                       | 0                                      | 0                                      | 0                                                  | 0            | 0                     | 0    |
| <i>GPR153</i>  | 1                       | 0                                      | 0                                      | 0                                                  | 0            | 0                     | 0    |
| <i>GPR155</i>  | 1                       | 0                                      | 1                                      | 0                                                  | 0            | 0                     | 0    |
| <i>GPR180</i>  | 0                       | 0                                      | 0                                      | 0                                                  | 0            | 1                     | 0    |
| <i>GPR19</i>   | 1                       | 0                                      | 0                                      | 0                                                  | 0            | 0                     | 0    |
| <i>GPR21</i>   | 1                       | 0                                      | 0                                      | 0                                                  | 0            | 0                     | 0    |
| <i>GPR22</i>   | 0                       | 0                                      | 0                                      | 0                                                  | 0            | 1                     | 0    |
| <i>GPR27</i>   | 1                       | 0                                      | 0                                      | 0                                                  | 0            | 0                     | 0    |
| <i>GPR65</i>   | 0                       | 0                                      | 0                                      | 0                                                  | 0            | 1                     | 0    |
| <i>GPRC5C</i>  | 1                       | 0                                      | 0                                      | 0                                                  | 0            | 0                     | 0    |
| <i>GPSM1</i>   | 1                       | 0                                      | 0                                      | 0                                                  | 0            | 0                     | 0    |
| <i>GPX3</i>    | 0                       | 0                                      | 0                                      | 0                                                  | 0            | 1                     | 0    |
| <i>GPX4</i>    | 1                       | 0                                      | 0                                      | 0                                                  | 0            | 0                     | 0    |

| Gene            | Multi-omics integration | Gene-based result from AFGen 2017 GWAS | Gene-based result from AFGen 2018 GWAS | Meta-analysis of SNPs by two large AF GWAS in 2018 | GWAS catalog | Open Targets Platform | OMIM |
|-----------------|-------------------------|----------------------------------------|----------------------------------------|----------------------------------------------------|--------------|-----------------------|------|
| <i>GRASP</i>    | 1                       | 0                                      | 0                                      | 0                                                  | 0            | 0                     | 0    |
| <i>GREM1</i>    | 1                       | 0                                      | 0                                      | 0                                                  | 0            | 0                     | 0    |
| <i>GREM2</i>    | 0                       | 0                                      | 0                                      | 0                                                  | 0            | 1                     | 0    |
| <i>GRHL1</i>    | 0                       | 0                                      | 0                                      | 0                                                  | 1            | 1                     | 0    |
| <i>GRHL3</i>    | 1                       | 0                                      | 0                                      | 0                                                  | 0            | 0                     | 0    |
| <i>GRIK5</i>    | 1                       | 0                                      | 0                                      | 0                                                  | 0            | 0                     | 0    |
| <i>GRIN1</i>    | 1                       | 0                                      | 0                                      | 0                                                  | 0            | 0                     | 0    |
| <i>GRIN2D</i>   | 1                       | 0                                      | 0                                      | 0                                                  | 0            | 0                     | 0    |
| <i>GRINA</i>    | 1                       | 0                                      | 0                                      | 0                                                  | 0            | 0                     | 0    |
| <i>GRK5</i>     | 1                       | 0                                      | 0                                      | 0                                                  | 0            | 1                     | 0    |
| <i>GRM1</i>     | 1                       | 0                                      | 0                                      | 0                                                  | 0            | 0                     | 0    |
| <i>GSD0B</i>    | 0                       | 0                                      | 0                                      | 0                                                  | 0            | 0                     | 1    |
| <i>GSD15</i>    | 0                       | 0                                      | 0                                      | 0                                                  | 0            | 0                     | 1    |
| <i>GSD3</i>     | 0                       | 0                                      | 0                                      | 0                                                  | 0            | 0                     | 1    |
| <i>GSDMC</i>    | 1                       | 0                                      | 0                                      | 0                                                  | 0            | 0                     | 0    |
| <i>GSK3A</i>    | 1                       | 0                                      | 0                                      | 0                                                  | 0            | 0                     | 0    |
| <i>GSN</i>      | 0                       | 0                                      | 0                                      | 0                                                  | 0            | 1                     | 0    |
| <i>GSTA1</i>    | 0                       | 0                                      | 0                                      | 0                                                  | 0            | 1                     | 0    |
| <i>GTF2I</i>    | 1                       | 0                                      | 1                                      | 1                                                  | 1            | 1                     | 0    |
| <i>GTF2IRD1</i> | 1                       | 0                                      | 0                                      | 0                                                  | 0            | 0                     | 0    |
| <i>GTF2IRD2</i> | 1                       | 0                                      | 0                                      | 0                                                  | 0            | 0                     | 0    |
| <i>GTPTS</i>    | 0                       | 0                                      | 0                                      | 0                                                  | 0            | 0                     | 1    |
| <i>GUCA2B</i>   | 0                       | 0                                      | 0                                      | 0                                                  | 0            | 0                     | 1    |
| <i>GUCY2C</i>   | 1                       | 0                                      | 0                                      | 0                                                  | 0            | 0                     | 0    |
| <i>GUCY2EP</i>  | 0                       | 0                                      | 0                                      | 0                                                  | 0            | 0                     | 1    |
| <i>GUK1</i>     | 1                       | 0                                      | 0                                      | 0                                                  | 0            | 0                     | 0    |
| <i>GUSB</i>     | 0                       | 0                                      | 0                                      | 0                                                  | 0            | 1                     | 0    |
| <i>GYG1</i>     | 1                       | 0                                      | 0                                      | 0                                                  | 0            | 0                     | 0    |
| <i>GYPB</i>     | 1                       | 0                                      | 0                                      | 0                                                  | 0            | 0                     | 0    |
| <i>GYPC</i>     | 1                       | 0                                      | 0                                      | 1                                                  | 1            | 1                     | 0    |
| <i>GZF1</i>     | 1                       | 0                                      | 0                                      | 0                                                  | 0            | 0                     | 0    |
| <i>H19</i>      | 0                       | 0                                      | 0                                      | 0                                                  | 0            | 1                     | 0    |
| <i>H1F0</i>     | 1                       | 0                                      | 0                                      | 0                                                  | 0            | 0                     | 0    |
| <i>H1FNT</i>    | 1                       | 0                                      | 0                                      | 0                                                  | 0            | 0                     | 0    |
| <i>H1FOO</i>    | 1                       | 0                                      | 0                                      | 0                                                  | 0            | 0                     | 0    |
| <i>H3F3AP4</i>  | 0                       | 0                                      | 0                                      | 0                                                  | 1            | 0                     | 0    |
| <i>HABP2</i>    | 1                       | 0                                      | 0                                      | 0                                                  | 0            | 1                     | 0    |
| <i>HABP4</i>    | 1                       | 0                                      | 0                                      | 0                                                  | 0            | 0                     | 0    |
| <i>HADH</i>     | 1                       | 0                                      | 0                                      | 0                                                  | 0            | 0                     | 0    |
| <i>HAGH</i>     | 1                       | 0                                      | 0                                      | 0                                                  | 0            | 0                     | 0    |
| <i>HAGHL</i>    | 1                       | 0                                      | 0                                      | 0                                                  | 0            | 0                     | 0    |
| <i>HAMP</i>     | 1                       | 0                                      | 0                                      | 0                                                  | 0            | 0                     | 0    |

| Gene             | Multi-omics integration | Gene-based result from AFGen 2017 GWAS | Gene-based result from AFGen 2018 GWAS | Meta-analysis of SNPs by two large AF GWAS in 2018 | GWAS catalog | Open Targets Platform | OMIM |
|------------------|-------------------------|----------------------------------------|----------------------------------------|----------------------------------------------------|--------------|-----------------------|------|
| <i>HAND1</i>     | 0                       | 0                                      | 0                                      | 0                                                  | 0            | 0                     | 1    |
| <i>HAND2</i>     | 1                       | 0                                      | 1                                      | 1                                                  | 1            | 1                     | 1    |
| <i>HAND2AS1</i>  | 0                       | 0                                      | 0                                      | 0                                                  | 0            | 0                     | 1    |
| <i>HAND2-AS1</i> | 0                       | 0                                      | 0                                      | 1                                                  | 0            | 0                     | 0    |
| <i>HARS</i>      | 1                       | 0                                      | 0                                      | 0                                                  | 0            | 0                     | 0    |
| <i>HARS2</i>     | 1                       | 0                                      | 0                                      | 0                                                  | 0            | 0                     | 0    |
| <i>HBEGF</i>     | 1                       | 0                                      | 0                                      | 1                                                  | 1            | 1                     | 0    |
| <i>HBM</i>       | 1                       | 0                                      | 0                                      | 0                                                  | 0            | 0                     | 0    |
| <i>HBP1</i>      | 1                       | 0                                      | 0                                      | 1                                                  | 0            | 0                     | 0    |
| <i>HBQ1</i>      | 1                       | 0                                      | 0                                      | 0                                                  | 0            | 0                     | 0    |
| <i>HCAD</i>      | 0                       | 0                                      | 0                                      | 0                                                  | 0            | 0                     | 1    |
| <i>HCFC2</i>     | 1                       | 0                                      | 0                                      | 0                                                  | 0            | 0                     | 0    |
| <i>HCG9</i>      | 0                       | 0                                      | 0                                      | 0                                                  | 0            | 1                     | 0    |
| <i>HCN2</i>      | 0                       | 0                                      | 0                                      | 0                                                  | 0            | 1                     | 0    |
| <i>HCN3</i>      | 1                       | 0                                      | 0                                      | 0                                                  | 0            | 1                     | 0    |
| <i>HCN4</i>      | 1                       | 1                                      | 1                                      | 1                                                  | 1            | 1                     | 1    |
| <i>HDAC10</i>    | 1                       | 0                                      | 0                                      | 0                                                  | 0            | 0                     | 0    |
| <i>HDAC3</i>     | 1                       | 0                                      | 0                                      | 0                                                  | 0            | 0                     | 0    |
| <i>HDAC4</i>     | 1                       | 0                                      | 0                                      | 0                                                  | 0            | 0                     | 0    |
| <i>HDAC6</i>     | 0                       | 0                                      | 0                                      | 0                                                  | 0            | 1                     | 0    |
| <i>HDAC7</i>     | 1                       | 0                                      | 0                                      | 0                                                  | 0            | 0                     | 0    |
| <i>HDAC8</i>     | 0                       | 0                                      | 0                                      | 0                                                  | 0            | 0                     | 1    |
| <i>HDAC9</i>     | 0                       | 0                                      | 0                                      | 0                                                  | 0            | 1                     | 0    |
| <i>HDCA</i>      | 0                       | 0                                      | 0                                      | 0                                                  | 0            | 0                     | 1    |
| <i>HDGFL1</i>    | 1                       | 0                                      | 0                                      | 0                                                  | 0            | 0                     | 0    |
| <i>HDHD3</i>     | 1                       | 0                                      | 0                                      | 0                                                  | 0            | 0                     | 0    |
| <i>HEG1</i>      | 0                       | 0                                      | 0                                      | 0                                                  | 0            | 0                     | 1    |
| <i>HERC1</i>     | 1                       | 0                                      | 0                                      | 1                                                  | 1            | 0                     | 0    |
| <i>HERC4</i>     | 1                       | 0                                      | 0                                      | 0                                                  | 0            | 0                     | 0    |
| <i>HERPUD1</i>   | 0                       | 0                                      | 0                                      | 0                                                  | 1            | 0                     | 0    |
| <i>HES4</i>      | 1                       | 0                                      | 0                                      | 0                                                  | 0            | 0                     | 0    |
| <i>HES6</i>      | 1                       | 0                                      | 0                                      | 0                                                  | 0            | 0                     | 0    |
| <i>HEXIM1</i>    | 1                       | 0                                      | 0                                      | 0                                                  | 0            | 0                     | 0    |
| <i>HEXIM2</i>    | 1                       | 0                                      | 0                                      | 0                                                  | 0            | 0                     | 0    |
| <i>HEY2</i>      | 1                       | 0                                      | 0                                      | 0                                                  | 0            | 0                     | 1    |
| <i>HEYL</i>      | 1                       | 0                                      | 0                                      | 0                                                  | 0            | 0                     | 0    |
| <i>HFASD</i>     | 0                       | 0                                      | 0                                      | 0                                                  | 0            | 0                     | 1    |
| <i>HFE2A</i>     | 0                       | 0                                      | 0                                      | 0                                                  | 0            | 0                     | 1    |
| <i>HFM</i>       | 0                       | 0                                      | 0                                      | 0                                                  | 0            | 0                     | 1    |
| <i>HGF</i>       | 0                       | 0                                      | 0                                      | 0                                                  | 0            | 1                     | 0    |
| <i>HHLA2</i>     | 1                       | 0                                      | 0                                      | 0                                                  | 0            | 0                     | 0    |



| Gene             | Multi-omics integration | Gene-based result from AFGen 2017 GWAS | Gene-based result from AFGen 2018 GWAS | Meta-analysis of SNPs by two large AF GWAS in 2018 | GWAS catalog | Open Targets Platform | OMIM |
|------------------|-------------------------|----------------------------------------|----------------------------------------|----------------------------------------------------|--------------|-----------------------|------|
| <i>HIBADH</i>    | 1                       | 0                                      | 0                                      | 0                                                  | 0            | 0                     | 0    |
| <i>HIF3A</i>     | 1                       | 0                                      | 0                                      | 0                                                  | 0            | 0                     | 0    |
| <i>HIGD1B</i>    | 1                       | 0                                      | 0                                      | 0                                                  | 0            | 0                     | 0    |
| <i>HIGD2A</i>    | 1                       | 0                                      | 0                                      | 0                                                  | 0            | 0                     | 0    |
| <i>HIP1</i>      | 1                       | 0                                      | 0                                      | 0                                                  | 0            | 0                     | 0    |
| <i>HIP1R</i>     | 1                       | 0                                      | 0                                      | 1                                                  | 1            | 1                     | 0    |
| <i>HIRIP3</i>    | 1                       | 0                                      | 0                                      | 0                                                  | 0            | 0                     | 0    |
| <i>HIST1H1D</i>  | 1                       | 0                                      | 0                                      | 0                                                  | 0            | 0                     | 0    |
| <i>HIST1H1E</i>  | 1                       | 0                                      | 0                                      | 0                                                  | 0            | 0                     | 0    |
| <i>HIST1H2AE</i> | 1                       | 0                                      | 0                                      | 0                                                  | 0            | 0                     | 0    |
| <i>HIST1H2BD</i> | 1                       | 0                                      | 0                                      | 0                                                  | 0            | 0                     | 0    |
| <i>HIST1H2BF</i> | 1                       | 0                                      | 0                                      | 0                                                  | 0            | 0                     | 0    |
| <i>HIST1H2BI</i> | 1                       | 0                                      | 0                                      | 0                                                  | 0            | 0                     | 0    |
| <i>HIST1H3D</i>  | 1                       | 0                                      | 0                                      | 0                                                  | 0            | 0                     | 0    |
| <i>HIST1H3E</i>  | 1                       | 0                                      | 0                                      | 0                                                  | 0            | 0                     | 0    |
| <i>HIST1H3G</i>  | 1                       | 0                                      | 0                                      | 0                                                  | 0            | 0                     | 0    |
| <i>HIST1H4D</i>  | 1                       | 0                                      | 0                                      | 0                                                  | 0            | 0                     | 0    |
| <i>HIST1H4E</i>  | 1                       | 0                                      | 0                                      | 0                                                  | 0            | 0                     | 0    |
| <i>HIST1H4F</i>  | 1                       | 0                                      | 0                                      | 0                                                  | 0            | 0                     | 0    |
| <i>HIST1H4G</i>  | 1                       | 0                                      | 0                                      | 0                                                  | 0            | 0                     | 0    |
| <i>HIST1H4H</i>  | 1                       | 0                                      | 0                                      | 0                                                  | 0            | 0                     | 0    |
| <i>HIST2H2AB</i> | 1                       | 0                                      | 0                                      | 0                                                  | 0            | 0                     | 0    |
| <i>HIST2H2BE</i> | 1                       | 0                                      | 0                                      | 0                                                  | 0            | 0                     | 0    |
| <i>HIST2H2BF</i> | 1                       | 0                                      | 0                                      | 0                                                  | 0            | 0                     | 0    |
| <i>HJCYS</i>     | 0                       | 0                                      | 0                                      | 0                                                  | 0            | 0                     | 1    |
| <i>HJV</i>       | 0                       | 0                                      | 0                                      | 0                                                  | 0            | 0                     | 1    |
| <i>HK3</i>       | 1                       | 0                                      | 0                                      | 0                                                  | 0            | 0                     | 0    |
| <i>HKLLS1</i>    | 0                       | 0                                      | 0                                      | 0                                                  | 0            | 0                     | 1    |
| <i>HLA-B</i>     | 0                       | 0                                      | 0                                      | 1                                                  | 0            | 1                     | 0    |
| <i>HLA-DQA2</i>  | 0                       | 0                                      | 0                                      | 0                                                  | 0            | 1                     | 0    |

| Gene            | Multi-omics integration | Gene-based result from AFGen 2017 GWAS | Gene-based result from AFGen 2018 GWAS | Meta-analysis of SNPs by two large AF GWAS in 2018 | GWAS catalog | Open Targets Platform | OMIM |
|-----------------|-------------------------|----------------------------------------|----------------------------------------|----------------------------------------------------|--------------|-----------------------|------|
| <i>HLA-DQB1</i> | 0                       | 0                                      | 0                                      | 0                                                  | 0            | 1                     | 0    |
| <i>HLA-DRB1</i> | 0                       | 0                                      | 0                                      | 0                                                  | 0            | 1                     | 0    |
| <i>HLHS1</i>    | 0                       | 0                                      | 0                                      | 0                                                  | 0            | 0                     | 1    |
| <i>HLHS2</i>    | 0                       | 0                                      | 0                                      | 0                                                  | 0            | 0                     | 1    |
| <i>HLTF</i>     | 1                       | 0                                      | 0                                      | 0                                                  | 0            | 0                     | 0    |
| <i>HMBS</i>     | 1                       | 0                                      | 0                                      | 0                                                  | 0            | 1                     | 0    |
| <i>HMGA1</i>    | 1                       | 0                                      | 0                                      | 0                                                  | 0            | 0                     | 0    |
| <i>HMGA2</i>    | 0                       | 0                                      | 0                                      | 0                                                  | 0            | 1                     | 0    |
| <i>HMGB1</i>    | 0                       | 0                                      | 0                                      | 0                                                  | 0            | 1                     | 0    |
| <i>HMGCL</i>    | 1                       | 0                                      | 0                                      | 0                                                  | 0            | 0                     | 0    |
| <i>HMGCR</i>    | 0                       | 0                                      | 0                                      | 0                                                  | 1            | 1                     | 0    |
| <i>HMGCS1</i>   | 1                       | 0                                      | 0                                      | 0                                                  | 0            | 0                     | 0    |
| <i>HMMS</i>     | 0                       | 0                                      | 0                                      | 0                                                  | 0            | 0                     | 1    |
| <i>HMN2D</i>    | 0                       | 0                                      | 0                                      | 0                                                  | 0            | 0                     | 1    |
| <i>HMOX1</i>    | 0                       | 0                                      | 0                                      | 0                                                  | 0            | 1                     | 0    |
| <i>HMSNO</i>    | 0                       | 0                                      | 0                                      | 0                                                  | 0            | 0                     | 1    |
| <i>HNF4G</i>    | 1                       | 0                                      | 0                                      | 0                                                  | 0            | 0                     | 0    |
| <i>HNRNPA0</i>  | 1                       | 1                                      | 1                                      | 0                                                  | 0            | 0                     | 0    |
| <i>HNRNPF</i>   | 1                       | 0                                      | 0                                      | 0                                                  | 0            | 0                     | 0    |
| <i>HNRNPR</i>   | 1                       | 0                                      | 0                                      | 0                                                  | 0            | 0                     | 0    |
| <i>HOMER2</i>   | 1                       | 0                                      | 0                                      | 0                                                  | 0            | 0                     | 0    |
| <i>HOPX</i>     | 0                       | 0                                      | 0                                      | 0                                                  | 0            | 1                     | 0    |
| <i>HOS</i>      | 0                       | 0                                      | 0                                      | 0                                                  | 0            | 0                     | 1    |
| <i>HOXA10</i>   | 1                       | 0                                      | 0                                      | 0                                                  | 0            | 0                     | 0    |
| <i>HOXA13</i>   | 1                       | 0                                      | 0                                      | 0                                                  | 0            | 0                     | 0    |
| <i>HOXA9</i>    | 1                       | 0                                      | 0                                      | 0                                                  | 0            | 0                     | 0    |
| <i>HOXD1</i>    | 1                       | 0                                      | 0                                      | 0                                                  | 0            | 0                     | 0    |
| <i>HOXD11</i>   | 1                       | 0                                      | 0                                      | 0                                                  | 0            | 0                     | 0    |
| <i>HOXD8</i>    | 1                       | 0                                      | 0                                      | 0                                                  | 0            | 0                     | 0    |
| <i>HOXD9</i>    | 1                       | 0                                      | 0                                      | 0                                                  | 0            | 0                     | 0    |
| <i>HPCAL4</i>   | 1                       | 0                                      | 0                                      | 0                                                  | 0            | 0                     | 0    |
| <i>HPGDS</i>    | 1                       | 0                                      | 0                                      | 0                                                  | 0            | 1                     | 0    |
| <i>HPMRS1</i>   | 0                       | 0                                      | 0                                      | 0                                                  | 0            | 0                     | 1    |
| <i>HPMRS2</i>   | 0                       | 0                                      | 0                                      | 0                                                  | 0            | 0                     | 1    |
| <i>HPMRS3</i>   | 0                       | 0                                      | 0                                      | 0                                                  | 0            | 0                     | 1    |
| <i>HPN</i>      | 0                       | 0                                      | 0                                      | 0                                                  | 0            | 1                     | 0    |
| <i>HPR</i>      | 0                       | 0                                      | 0                                      | 0                                                  | 0            | 1                     | 0    |
| <i>HPRT1</i>    | 0                       | 0                                      | 0                                      | 0                                                  | 0            | 1                     | 0    |
| <i>HPS3</i>     | 1                       | 0                                      | 0                                      | 0                                                  | 0            | 0                     | 0    |
| <i>HPS6</i>     | 1                       | 0                                      | 0                                      | 0                                                  | 0            | 0                     | 0    |
| <i>HRAS</i>     | 0                       | 0                                      | 0                                      | 0                                                  | 0            | 0                     | 1    |
| <i>HRASLS</i>   | 1                       | 0                                      | 0                                      | 0                                                  | 0            | 0                     | 0    |

| Gene           | Multi-omics integration | Gene-based result from AFGen 2017 GWAS | Gene-based result from AFGen 2018 GWAS | Meta-analysis of SNPs by two large AF GWAS in 2018 | GWAS catalog | Open Targets Platform | OMIM |
|----------------|-------------------------|----------------------------------------|----------------------------------------|----------------------------------------------------|--------------|-----------------------|------|
| <i>HRASLS2</i> | 1                       | 0                                      | 0                                      | 0                                                  | 0            | 0                     | 0    |
| <i>HRH1</i>    | 0                       | 0                                      | 0                                      | 0                                                  | 0            | 1                     | 0    |
| <i>HRH2</i>    | 0                       | 0                                      | 0                                      | 0                                                  | 0            | 1                     | 0    |
| <i>HRH3</i>    | 1                       | 0                                      | 0                                      | 0                                                  | 0            | 0                     | 0    |
| <i>HSD11B2</i> | 0                       | 0                                      | 0                                      | 0                                                  | 0            | 1                     | 0    |
| <i>HSD17B1</i> | 1                       | 0                                      | 0                                      | 0                                                  | 0            | 0                     | 0    |
| <i>HSD17B3</i> | 1                       | 0                                      | 0                                      | 0                                                  | 0            | 0                     | 0    |
| <i>HSD17B6</i> | 1                       | 0                                      | 1                                      | 0                                                  | 0            | 1                     | 0    |
| <i>HSD17B7</i> | 0                       | 0                                      | 0                                      | 0                                                  | 0            | 0                     | 1    |
| <i>HSF1</i>    | 0                       | 0                                      | 0                                      | 0                                                  | 0            | 1                     | 0    |
| <i>HSF2</i>    | 1                       | 0                                      | 1                                      | 1                                                  | 0            | 1                     | 0    |
| <i>HSF4</i>    | 1                       | 0                                      | 0                                      | 0                                                  | 0            | 0                     | 0    |
| <i>HSP90B1</i> | 1                       | 0                                      | 0                                      | 0                                                  | 0            | 1                     | 0    |
| <i>HSPA13</i>  | 1                       | 0                                      | 0                                      | 0                                                  | 0            | 0                     | 0    |
| <i>HSPA14</i>  | 0                       | 0                                      | 0                                      | 0                                                  | 0            | 1                     | 0    |
| <i>HSPA1A</i>  | 1                       | 0                                      | 0                                      | 0                                                  | 0            | 0                     | 0    |
| <i>HSPA1L</i>  | 1                       | 0                                      | 0                                      | 0                                                  | 0            | 0                     | 0    |
| <i>HSPA5</i>   | 1                       | 0                                      | 0                                      | 0                                                  | 0            | 0                     | 0    |
| <i>HSPA9</i>   | 0                       | 0                                      | 0                                      | 0                                                  | 0            | 1                     | 0    |
| <i>HSPB1</i>   | 0                       | 0                                      | 0                                      | 0                                                  | 0            | 1                     | 0    |
| <i>HSPD1</i>   | 1                       | 0                                      | 0                                      | 0                                                  | 0            | 1                     | 0    |
| <i>HSPG2</i>   | 1                       | 0                                      | 0                                      | 1                                                  | 1            | 0                     | 0    |
| <i>HTR3C</i>   | 1                       | 0                                      | 0                                      | 0                                                  | 0            | 0                     | 0    |
| <i>HTR4</i>    | 0                       | 0                                      | 0                                      | 0                                                  | 0            | 1                     | 1    |
| <i>HTRA2</i>   | 0                       | 0                                      | 0                                      | 0                                                  | 0            | 1                     | 0    |
| <i>HTX1</i>    | 0                       | 0                                      | 0                                      | 0                                                  | 0            | 0                     | 1    |
| <i>HTX3</i>    | 0                       | 0                                      | 0                                      | 0                                                  | 0            | 0                     | 1    |
| <i>HTX4</i>    | 0                       | 0                                      | 0                                      | 0                                                  | 0            | 0                     | 1    |
| <i>HTX5</i>    | 0                       | 0                                      | 0                                      | 0                                                  | 0            | 0                     | 1    |
| <i>HTX6</i>    | 0                       | 0                                      | 0                                      | 0                                                  | 0            | 0                     | 1    |
| <i>HTX7</i>    | 0                       | 0                                      | 0                                      | 0                                                  | 0            | 0                     | 1    |
| <i>HTX8</i>    | 0                       | 0                                      | 0                                      | 0                                                  | 0            | 0                     | 1    |
| <i>HYAL1</i>   | 1                       | 0                                      | 0                                      | 0                                                  | 0            | 0                     | 0    |
| <i>HYAL2</i>   | 1                       | 0                                      | 0                                      | 0                                                  | 0            | 0                     | 0    |
| <i>HYC2</i>    | 0                       | 0                                      | 0                                      | 0                                                  | 0            | 0                     | 1    |
| <i>HYLS1</i>   | 1                       | 0                                      | 0                                      | 0                                                  | 0            | 0                     | 0    |
| <i>IAH1</i>    | 0                       | 0                                      | 0                                      | 0                                                  | 0            | 1                     | 0    |
| <i>IAPP</i>    | 1                       | 0                                      | 0                                      | 0                                                  | 0            | 1                     | 0    |
| <i>IBTK</i>    | 0                       | 0                                      | 0                                      | 0                                                  | 0            | 1                     | 0    |
| <i>ICAM1</i>   | 1                       | 0                                      | 0                                      | 0                                                  | 0            | 1                     | 0    |
| <i>ICAM3</i>   | 1                       | 0                                      | 0                                      | 0                                                  | 0            | 0                     | 0    |
| <i>ICAM4</i>   | 1                       | 0                                      | 0                                      | 0                                                  | 0            | 0                     | 0    |
| <i>ICAM5</i>   | 1                       | 0                                      | 0                                      | 0                                                  | 0            | 0                     | 0    |

| Gene           | Multi-omics integration | Gene-based result from AFGen 2017 GWAS | Gene-based result from AFGen 2018 GWAS | Meta-analysis of SNPs by two large AF GWAS in 2018 | GWAS catalog | Open Targets Platform | OMIM |
|----------------|-------------------------|----------------------------------------|----------------------------------------|----------------------------------------------------|--------------|-----------------------|------|
| <i>IDH1</i>    | 0                       | 0                                      | 0                                      | 0                                                  | 0            | 1                     | 0    |
| <i>IDS</i>     | 0                       | 0                                      | 0                                      | 0                                                  | 0            | 1                     | 0    |
| <i>IDUA</i>    | 1                       | 0                                      | 0                                      | 0                                                  | 0            | 0                     | 0    |
| <i>IER2</i>    | 1                       | 0                                      | 0                                      | 0                                                  | 0            | 0                     | 0    |
| <i>IER5L</i>   | 1                       | 0                                      | 0                                      | 0                                                  | 0            | 0                     | 0    |
| <i>IFNG</i>    | 0                       | 0                                      | 0                                      | 0                                                  | 0            | 1                     | 0    |
| <i>IFNGR2</i>  | 0                       | 0                                      | 0                                      | 0                                                  | 0            | 1                     | 0    |
| <i>IFRD1</i>   | 1                       | 0                                      | 0                                      | 0                                                  | 0            | 0                     | 0    |
| <i>IFT140</i>  | 1                       | 0                                      | 0                                      | 0                                                  | 0            | 0                     | 0    |
| <i>IGDCC3</i>  | 1                       | 0                                      | 0                                      | 0                                                  | 0            | 0                     | 0    |
| <i>IGF1</i>    | 0                       | 0                                      | 0                                      | 0                                                  | 0            | 1                     | 0    |
| <i>IGF1R</i>   | 1                       | 0                                      | 1                                      | 1                                                  | 1            | 1                     | 0    |
| <i>IGF1RES</i> | 0                       | 0                                      | 0                                      | 0                                                  | 0            | 0                     | 1    |
| <i>IGF2</i>    | 0                       | 0                                      | 0                                      | 0                                                  | 0            | 1                     | 0    |
| <i>IGF2BP2</i> | 1                       | 0                                      | 0                                      | 0                                                  | 0            | 0                     | 0    |
| <i>IGFALS</i>  | 1                       | 0                                      | 0                                      | 0                                                  | 0            | 0                     | 0    |
| <i>IGFBP2</i>  | 0                       | 0                                      | 0                                      | 0                                                  | 0            | 1                     | 0    |
| <i>IGFBP3</i>  | 0                       | 0                                      | 0                                      | 0                                                  | 0            | 1                     | 0    |
| <i>IGFBP7</i>  | 1                       | 0                                      | 0                                      | 0                                                  | 0            | 1                     | 0    |
| <i>IGHMBP2</i> | 0                       | 0                                      | 0                                      | 0                                                  | 0            | 0                     | 1    |
| <i>IHH</i>     | 1                       | 0                                      | 0                                      | 0                                                  | 0            | 0                     | 0    |
| <i>IK</i>      | 0                       | 0                                      | 0                                      | 0                                                  | 0            | 1                     | 0    |
| <i>IKZF3</i>   | 1                       | 0                                      | 0                                      | 0                                                  | 0            | 0                     | 0    |
| <i>IL10</i>    | 0                       | 0                                      | 0                                      | 0                                                  | 0            | 1                     | 0    |
| <i>IL11</i>    | 0                       | 0                                      | 0                                      | 0                                                  | 0            | 1                     | 0    |
| <i>IL15</i>    | 0                       | 0                                      | 0                                      | 0                                                  | 0            | 1                     | 0    |
| <i>IL17A</i>   | 0                       | 0                                      | 0                                      | 0                                                  | 0            | 1                     | 0    |
| <i>IL17D</i>   | 0                       | 0                                      | 0                                      | 0                                                  | 0            | 1                     | 0    |
| <i>IL18</i>    | 1                       | 0                                      | 0                                      | 0                                                  | 0            | 1                     | 0    |
| <i>IL18R1</i>  | 0                       | 0                                      | 0                                      | 0                                                  | 0            | 1                     | 0    |
| <i>IL1B</i>    | 0                       | 0                                      | 0                                      | 0                                                  | 0            | 1                     | 0    |
| <i>IL1RN</i>   | 0                       | 0                                      | 0                                      | 0                                                  | 0            | 1                     | 0    |
| <i>IL2</i>     | 0                       | 0                                      | 0                                      | 0                                                  | 0            | 1                     | 0    |
| <i>IL20RB</i>  | 1                       | 0                                      | 0                                      | 0                                                  | 0            | 0                     | 0    |
| <i>IL25</i>    | 1                       | 0                                      | 1                                      | 0                                                  | 0            | 0                     | 0    |
| <i>IL3</i>     | 1                       | 0                                      | 0                                      | 0                                                  | 0            | 0                     | 0    |
| <i>IL31RA</i>  | 0                       | 0                                      | 0                                      | 0                                                  | 0            | 1                     | 0    |
| <i>IL33</i>    | 0                       | 0                                      | 0                                      | 0                                                  | 0            | 1                     | 0    |
| <i>IL37</i>    | 0                       | 0                                      | 0                                      | 0                                                  | 0            | 1                     | 0    |
| <i>IL4</i>     | 0                       | 0                                      | 0                                      | 0                                                  | 0            | 1                     | 0    |
| <i>IL4I1</i>   | 0                       | 0                                      | 0                                      | 0                                                  | 0            | 1                     | 0    |
| <i>IL6</i>     | 0                       | 0                                      | 0                                      | 0                                                  | 0            | 1                     | 0    |
| <i>IL6R</i>    | 1                       | 0                                      | 0                                      | 1                                                  | 1            | 1                     | 0    |
| <i>IL9</i>     | 1                       | 0                                      | 0                                      | 0                                                  | 0            | 1                     | 0    |

| Gene           | Multi-omics integration | Gene-based result from AFGen 2017 GWAS | Gene-based result from AFGen 2018 GWAS | Meta-analysis of SNPs by two large AF GWAS in 2018 | GWAS catalog | Open Targets Platform | OMIM |
|----------------|-------------------------|----------------------------------------|----------------------------------------|----------------------------------------------------|--------------|-----------------------|------|
| <i>ILDR2</i>   | 1                       | 0                                      | 0                                      | 0                                                  | 0            | 0                     | 0    |
| <i>ILF2</i>    | 1                       | 0                                      | 0                                      | 0                                                  | 0            | 0                     | 0    |
| <i>ILK</i>     | 0                       | 0                                      | 0                                      | 0                                                  | 0            | 0                     | 1    |
| <i>IMDDHH</i>  | 0                       | 0                                      | 0                                      | 0                                                  | 0            | 0                     | 1    |
| <i>IMF1</i>    | 0                       | 0                                      | 0                                      | 0                                                  | 0            | 0                     | 1    |
| <i>IMMT</i>    | 1                       | 0                                      | 0                                      | 0                                                  | 0            | 0                     | 0    |
| <i>INA</i>     | 1                       | 0                                      | 0                                      | 0                                                  | 0            | 0                     | 0    |
| <i>ING1</i>    | 1                       | 0                                      | 0                                      | 0                                                  | 0            | 0                     | 0    |
| <i>INHA</i>    | 1                       | 0                                      | 0                                      | 0                                                  | 0            | 0                     | 0    |
| <i>INHBA</i>   | 0                       | 0                                      | 0                                      | 0                                                  | 0            | 1                     | 0    |
| <i>INO80E</i>  | 1                       | 0                                      | 0                                      | 0                                                  | 0            | 0                     | 0    |
| <i>INPP5K</i>  | 1                       | 0                                      | 0                                      | 0                                                  | 0            | 0                     | 0    |
| <i>INS</i>     | 0                       | 0                                      | 0                                      | 0                                                  | 0            | 1                     | 0    |
| <i>INSM2</i>   | 1                       | 0                                      | 0                                      | 0                                                  | 0            | 0                     | 0    |
| <i>INSRR</i>   | 0                       | 0                                      | 0                                      | 0                                                  | 0            | 1                     | 0    |
| <i>INTS3</i>   | 1                       | 0                                      | 0                                      | 0                                                  | 0            | 0                     | 0    |
| <i>INTS4</i>   | 1                       | 0                                      | 0                                      | 0                                                  | 0            | 0                     | 0    |
| <i>INVS</i>    | 1                       | 0                                      | 0                                      | 0                                                  | 0            | 0                     | 0    |
| <i>IPMK</i>    | 1                       | 0                                      | 0                                      | 0                                                  | 0            | 0                     | 0    |
| <i>IPO8</i>    | 0                       | 0                                      | 0                                      | 0                                                  | 0            | 1                     | 0    |
| <i>IQCD</i>    | 1                       | 0                                      | 0                                      | 0                                                  | 0            | 0                     | 0    |
| <i>IQCH</i>    | 1                       | 0                                      | 0                                      | 0                                                  | 0            | 0                     | 0    |
| <i>IQGAP3</i>  | 1                       | 0                                      | 0                                      | 0                                                  | 0            | 0                     | 0    |
| <i>IQSEC1</i>  | 1                       | 0                                      | 0                                      | 0                                                  | 0            | 0                     | 0    |
| <i>IRF2BP1</i> | 1                       | 0                                      | 0                                      | 0                                                  | 0            | 0                     | 0    |
| <i>IRF2BPL</i> | 0                       | 0                                      | 0                                      | 1                                                  | 0            | 1                     | 0    |
| <i>IRF5</i>    | 1                       | 0                                      | 0                                      | 0                                                  | 0            | 0                     | 0    |
| <i>IRF6</i>    | 0                       | 0                                      | 0                                      | 0                                                  | 0            | 1                     | 0    |
| <i>ISCA1</i>   | 1                       | 0                                      | 0                                      | 0                                                  | 0            | 0                     | 0    |
| <i>ISL1</i>    | 0                       | 0                                      | 0                                      | 0                                                  | 0            | 0                     | 1    |
| <i>ISL2</i>    | 1                       | 0                                      | 0                                      | 0                                                  | 0            | 0                     | 0    |
| <i>ISOC2</i>   | 1                       | 0                                      | 0                                      | 0                                                  | 0            | 0                     | 0    |
| <i>ITGA5</i>   | 0                       | 0                                      | 0                                      | 0                                                  | 0            | 1                     | 0    |
| <i>ITGA9</i>   | 1                       | 0                                      | 0                                      | 0                                                  | 0            | 0                     | 0    |
| <i>ITGB1</i>   | 1                       | 0                                      | 0                                      | 0                                                  | 0            | 0                     | 0    |
| <i>ITGB2</i>   | 0                       | 0                                      | 0                                      | 0                                                  | 0            | 1                     | 0    |
| <i>ITGB3</i>   | 0                       | 0                                      | 0                                      | 0                                                  | 0            | 1                     | 0    |
| <i>ITLN1</i>   | 0                       | 0                                      | 0                                      | 0                                                  | 0            | 1                     | 0    |
| <i>ITPK1</i>   | 1                       | 0                                      | 0                                      | 0                                                  | 1            | 1                     | 0    |
| <i>ITPRIP</i>  | 1                       | 0                                      | 0                                      | 0                                                  | 0            | 0                     | 0    |
| <i>IVD</i>     | 0                       | 0                                      | 0                                      | 0                                                  | 0            | 1                     | 0    |
| <i>JAM3</i>    | 0                       | 0                                      | 0                                      | 0                                                  | 0            | 0                     | 1    |
| <i>JARID2</i>  | 1                       | 0                                      | 0                                      | 0                                                  | 0            | 0                     | 0    |
| <i>JAZF1</i>   | 1                       | 0                                      | 0                                      | 0                                                  | 0            | 0                     | 0    |

| Gene           | Multi-omics integration | Gene-based result from AFGen 2017 GWAS | Gene-based result from AFGen 2018 GWAS | Meta-analysis of SNPs by two large AF GWAS in 2018 | GWAS catalog | Open Targets Platform | OMIM |
|----------------|-------------------------|----------------------------------------|----------------------------------------|----------------------------------------------------|--------------|-----------------------|------|
| <i>JBS</i>     | 0                       | 0                                      | 0                                      | 0                                                  | 0            | 0                     | 1    |
| <i>JBS</i>     | 0                       | 0                                      | 0                                      | 0                                                  | 0            | 0                     | 1    |
| <i>JDSCD</i>   | 0                       | 0                                      | 0                                      | 0                                                  | 0            | 0                     | 1    |
| <i>JLNS1</i>   | 0                       | 0                                      | 0                                      | 0                                                  | 0            | 0                     | 1    |
| <i>JMJD1C</i>  | 1                       | 0                                      | 1                                      | 0                                                  | 0            | 0                     | 0    |
| <i>JMJD8</i>   | 1                       | 0                                      | 0                                      | 0                                                  | 0            | 0                     | 0    |
| <i>JOSD1</i>   | 1                       | 0                                      | 0                                      | 0                                                  | 0            | 0                     | 0    |
| <i>JPH2</i>    | 1                       | 0                                      | 0                                      | 0                                                  | 0            | 1                     | 0    |
| <i>JSRP1</i>   | 1                       | 0                                      | 0                                      | 0                                                  | 0            | 0                     | 0    |
| <i>KABUK1</i>  | 0                       | 0                                      | 0                                      | 0                                                  | 0            | 0                     | 1    |
| <i>KABUK2</i>  | 0                       | 0                                      | 0                                      | 0                                                  | 0            | 0                     | 1    |
| <i>KANK4</i>   | 0                       | 0                                      | 0                                      | 0                                                  | 0            | 0                     | 1    |
| <i>KBTBD11</i> | 1                       | 0                                      | 0                                      | 0                                                  | 0            | 0                     | 0    |
| <i>KCNA1</i>   | 0                       | 0                                      | 0                                      | 0                                                  | 0            | 1                     | 0    |
| <i>KCNA10</i>  | 0                       | 0                                      | 0                                      | 0                                                  | 0            | 1                     | 0    |
| <i>KCNA2</i>   | 0                       | 0                                      | 0                                      | 0                                                  | 0            | 1                     | 0    |
| <i>KCNA3</i>   | 0                       | 0                                      | 0                                      | 0                                                  | 0            | 1                     | 0    |
| <i>KCNA4</i>   | 1                       | 0                                      | 0                                      | 0                                                  | 0            | 1                     | 1    |
| <i>KCNA5</i>   | 0                       | 0                                      | 0                                      | 0                                                  | 0            | 1                     | 1    |
| <i>KCNA6</i>   | 0                       | 0                                      | 0                                      | 0                                                  | 0            | 1                     | 0    |
| <i>KCNA7</i>   | 0                       | 0                                      | 0                                      | 0                                                  | 0            | 1                     | 0    |
| <i>KCNB1</i>   | 1                       | 0                                      | 0                                      | 0                                                  | 0            | 1                     | 0    |
| <i>KCNB2</i>   | 0                       | 0                                      | 0                                      | 0                                                  | 0            | 1                     | 0    |
| <i>KCNC1</i>   | 0                       | 0                                      | 0                                      | 0                                                  | 0            | 1                     | 0    |
| <i>KCNC2</i>   | 0                       | 0                                      | 0                                      | 0                                                  | 0            | 1                     | 0    |
| <i>KCNC3</i>   | 0                       | 0                                      | 0                                      | 0                                                  | 0            | 1                     | 0    |
| <i>KCNC4</i>   | 0                       | 0                                      | 0                                      | 0                                                  | 0            | 1                     | 0    |
| <i>KCND1</i>   | 0                       | 0                                      | 0                                      | 0                                                  | 0            | 1                     | 0    |
| <i>KCND2</i>   | 0                       | 0                                      | 0                                      | 0                                                  | 0            | 1                     | 0    |
| <i>KCND3</i>   | 1                       | 0                                      | 1                                      | 1                                                  | 1            | 1                     | 1    |
| <i>KCNE1</i>   | 1                       | 0                                      | 0                                      | 0                                                  | 0            | 1                     | 0    |
| <i>KCNE1B</i>  | 0                       | 0                                      | 0                                      | 0                                                  | 0            | 1                     | 0    |
| <i>KCNE2</i>   | 1                       | 0                                      | 0                                      | 0                                                  | 0            | 1                     | 1    |
| <i>KCNE3</i>   | 0                       | 0                                      | 0                                      | 0                                                  | 0            | 1                     | 1    |
| <i>KCNE4</i>   | 0                       | 0                                      | 0                                      | 0                                                  | 0            | 1                     | 0    |
| <i>KCNE5</i>   | 0                       | 0                                      | 0                                      | 0                                                  | 0            | 1                     | 0    |
| <i>KCNF1</i>   | 0                       | 0                                      | 0                                      | 0                                                  | 0            | 1                     | 0    |
| <i>KCNG1</i>   | 0                       | 0                                      | 0                                      | 0                                                  | 0            | 1                     | 0    |
| <i>KCNG2</i>   | 0                       | 0                                      | 0                                      | 0                                                  | 0            | 1                     | 0    |
| <i>KCNG3</i>   | 0                       | 0                                      | 0                                      | 0                                                  | 0            | 1                     | 0    |
| <i>KCNG4</i>   | 0                       | 0                                      | 0                                      | 0                                                  | 0            | 1                     | 0    |
| <i>KCNH1</i>   | 0                       | 0                                      | 0                                      | 0                                                  | 0            | 1                     | 0    |
| <i>KCNH2</i>   | 1                       | 0                                      | 1                                      | 1                                                  | 1            | 1                     | 1    |
| <i>KCNH3</i>   | 1                       | 0                                      | 0                                      | 0                                                  | 0            | 1                     | 0    |

| Gene          | Multi-omics integration | Gene-based result from AFGen 2017 GWAS | Gene-based result from AFGen 2018 GWAS | Meta-analysis of SNPs by two large AF GWAS in 2018 | GWAS catalog | Open Targets Platform | OMIM |
|---------------|-------------------------|----------------------------------------|----------------------------------------|----------------------------------------------------|--------------|-----------------------|------|
| <i>KCNH4</i>  | 0                       | 0                                      | 0                                      | 0                                                  | 0            | 1                     | 0    |
| <i>KCNH5</i>  | 0                       | 0                                      | 0                                      | 0                                                  | 0            | 1                     | 0    |
| <i>KCNH6</i>  | 0                       | 0                                      | 0                                      | 0                                                  | 0            | 1                     | 0    |
| <i>KCNH7</i>  | 0                       | 0                                      | 0                                      | 0                                                  | 0            | 1                     | 0    |
| <i>KCNH8</i>  | 0                       | 0                                      | 0                                      | 0                                                  | 0            | 1                     | 0    |
| <i>KCNIP1</i> | 0                       | 0                                      | 0                                      | 0                                                  | 0            | 1                     | 0    |
| <i>KCNIP2</i> | 1                       | 0                                      | 1                                      | 0                                                  | 0            | 1                     | 0    |
| <i>KCNJ1</i>  | 1                       | 0                                      | 1                                      | 0                                                  | 0            | 0                     | 0    |
| <i>KCNJ12</i> | 0                       | 0                                      | 0                                      | 0                                                  | 0            | 0                     | 1    |
| <i>KCNJ2</i>  | 1                       | 0                                      | 0                                      | 0                                                  | 0            | 1                     | 1    |
| <i>KCNJ3</i>  | 0                       | 0                                      | 0                                      | 0                                                  | 0            | 1                     | 1    |
| <i>KCNJ5</i>  | 1                       | 0                                      | 1                                      | 1                                                  | 1            | 1                     | 1    |
| <i>KCNJ6</i>  | 1                       | 0                                      | 0                                      | 0                                                  | 0            | 0                     | 0    |
| <i>KCNJ8</i>  | 0                       | 0                                      | 0                                      | 0                                                  | 0            | 1                     | 1    |
| <i>KCNK1</i>  | 0                       | 0                                      | 0                                      | 0                                                  | 0            | 1                     | 0    |
| <i>KCNK15</i> | 1                       | 0                                      | 0                                      | 0                                                  | 0            | 0                     | 0    |
| <i>KCNK17</i> | 0                       | 0                                      | 0                                      | 0                                                  | 0            | 1                     | 1    |
| <i>KCNK3</i>  | 0                       | 0                                      | 0                                      | 0                                                  | 0            | 1                     | 0    |
| <i>KCNK7</i>  | 1                       | 0                                      | 0                                      | 0                                                  | 0            | 0                     | 0    |
| <i>KCNK9</i>  | 0                       | 0                                      | 0                                      | 0                                                  | 0            | 1                     | 0    |
| <i>KCNN2</i>  | 1                       | 0                                      | 1                                      | 1                                                  | 1            | 1                     | 0    |
| <i>KCNN3</i>  | 1                       | 1                                      | 1                                      | 1                                                  | 1            | 1                     | 1    |
| <i>KCNQ1</i>  | 0                       | 0                                      | 0                                      | 0                                                  | 0            | 1                     | 1    |
| <i>KCNQ2</i>  | 0                       | 0                                      | 0                                      | 0                                                  | 0            | 1                     | 0    |
| <i>KCNQ3</i>  | 0                       | 0                                      | 0                                      | 0                                                  | 0            | 1                     | 0    |
| <i>KCNQ4</i>  | 1                       | 0                                      | 0                                      | 0                                                  | 0            | 1                     | 0    |
| <i>KCNQ5</i>  | 0                       | 0                                      | 0                                      | 0                                                  | 0            | 1                     | 0    |
| <i>KCNRG</i>  | 1                       | 0                                      | 0                                      | 0                                                  | 0            | 0                     | 0    |
| <i>KCNS1</i>  | 1                       | 0                                      | 0                                      | 0                                                  | 0            | 1                     | 0    |
| <i>KCNS2</i>  | 1                       | 0                                      | 0                                      | 0                                                  | 0            | 1                     | 0    |
| <i>KCNS3</i>  | 0                       | 0                                      | 0                                      | 0                                                  | 0            | 1                     | 0    |
| <i>KCNV1</i>  | 0                       | 0                                      | 0                                      | 0                                                  | 0            | 1                     | 0    |
| <i>KCNV2</i>  | 0                       | 0                                      | 0                                      | 0                                                  | 0            | 1                     | 0    |
| <i>KCP</i>    | 1                       | 0                                      | 0                                      | 0                                                  | 0            | 0                     | 0    |
| <i>KCTD10</i> | 1                       | 0                                      | 0                                      | 0                                                  | 0            | 0                     | 0    |
| <i>KCTD11</i> | 1                       | 0                                      | 0                                      | 0                                                  | 0            | 0                     | 0    |
| <i>KCTD20</i> | 1                       | 0                                      | 0                                      | 0                                                  | 0            | 0                     | 0    |
| <i>KCTD7</i>  | 1                       | 0                                      | 0                                      | 0                                                  | 0            | 0                     | 0    |
| <i>KDM1B</i>  | 0                       | 0                                      | 0                                      | 1                                                  | 1            | 1                     | 0    |
| <i>KDM3A</i>  | 1                       | 0                                      | 1                                      | 0                                                  | 1            | 0                     | 0    |
| <i>KDM3B</i>  | 1                       | 0                                      | 1                                      | 0                                                  | 0            | 0                     | 0    |
| <i>KDM4B</i>  | 1                       | 0                                      | 0                                      | 0                                                  | 0            | 0                     | 0    |
| <i>KDM6A</i>  | 0                       | 0                                      | 0                                      | 0                                                  | 0            | 0                     | 1    |
| <i>KDM6B</i>  | 1                       | 0                                      | 0                                      | 0                                                  | 0            | 0                     | 0    |

| Gene            | Multi-omics integration | Gene-based result from AFGen 2017 GWAS | Gene-based result from AFGen 2018 GWAS | Meta-analysis of SNPs by two large AF GWAS in 2018 | GWAS catalog | Open Targets Platform | OMIM |
|-----------------|-------------------------|----------------------------------------|----------------------------------------|----------------------------------------------------|--------------|-----------------------|------|
| <i>KDVS</i>     | 0                       | 0                                      | 0                                      | 0                                                  | 0            | 0                     | 1    |
| <i>KEL</i>      | 1                       | 0                                      | 0                                      | 0                                                  | 0            | 0                     | 0    |
| <i>KFS4</i>     | 0                       | 0                                      | 0                                      | 0                                                  | 0            | 0                     | 1    |
| <i>KIAA0040</i> | 1                       | 0                                      | 0                                      | 0                                                  | 0            | 0                     | 0    |
| <i>KIAA0232</i> | 1                       | 0                                      | 0                                      | 0                                                  | 0            | 0                     | 0    |
| <i>KIAA0442</i> | 0                       | 0                                      | 0                                      | 0                                                  | 0            | 0                     | 1    |
| <i>KIAA1109</i> | 0                       | 0                                      | 0                                      | 0                                                  | 0            | 1                     | 0    |
| <i>KIAA1147</i> | 1                       | 0                                      | 0                                      | 0                                                  | 0            | 0                     | 0    |
| <i>KIAA1191</i> | 1                       | 0                                      | 0                                      | 0                                                  | 0            | 0                     | 0    |
| <i>KIAA1841</i> | 1                       | 0                                      | 0                                      | 0                                                  | 0            | 0                     | 0    |
| <i>KIF11</i>    | 0                       | 0                                      | 0                                      | 0                                                  | 0            | 0                     | 1    |
| <i>KIF14</i>    | 1                       | 0                                      | 0                                      | 0                                                  | 0            | 0                     | 0    |
| <i>KIF17</i>    | 1                       | 0                                      | 0                                      | 0                                                  | 0            | 0                     | 0    |
| <i>KIF20A</i>   | 1                       | 0                                      | 1                                      | 0                                                  | 0            | 0                     | 0    |
| <i>KIF3C</i>    | 1                       | 0                                      | 1                                      | 1                                                  | 1            | 1                     | 0    |
| <i>KIF5B</i>    | 1                       | 0                                      | 0                                      | 0                                                  | 0            | 0                     | 0    |
| <i>KIF7</i>     | 1                       | 0                                      | 0                                      | 0                                                  | 0            | 0                     | 0    |
| <i>KIFAP3</i>   | 1                       | 0                                      | 0                                      | 0                                                  | 0            | 0                     | 0    |
| <i>KL</i>       | 0                       | 0                                      | 0                                      | 0                                                  | 0            | 1                     | 0    |
| <i>KLC3</i>     | 1                       | 0                                      | 0                                      | 0                                                  | 0            | 0                     | 0    |
| <i>KLEFS1</i>   | 0                       | 0                                      | 0                                      | 0                                                  | 0            | 0                     | 1    |
| <i>KLF11</i>    | 1                       | 0                                      | 0                                      | 0                                                  | 0            | 0                     | 0    |
| <i>KLF12</i>    | 1                       | 0                                      | 0                                      | 0                                                  | 0            | 0                     | 0    |
| <i>KLF7</i>     | 1                       | 0                                      | 0                                      | 0                                                  | 0            | 0                     | 0    |
| <i>KLHDC10</i>  | 1                       | 0                                      | 0                                      | 0                                                  | 0            | 0                     | 0    |
| <i>KLHL14</i>   | 1                       | 0                                      | 0                                      | 0                                                  | 0            | 0                     | 0    |
| <i>KLHL17</i>   | 1                       | 0                                      | 0                                      | 0                                                  | 0            | 0                     | 0    |
| <i>KLHL21</i>   | 1                       | 0                                      | 0                                      | 0                                                  | 0            | 0                     | 0    |
| <i>KLHL3</i>    | 1                       | 0                                      | 1                                      | 0                                                  | 0            | 0                     | 0    |
| <i>KLHL30</i>   | 0                       | 0                                      | 1                                      | 0                                                  | 0            | 0                     | 0    |
| <i>KLHL38</i>   | 0                       | 0                                      | 0                                      | 1                                                  | 1            | 1                     | 0    |
| <i>KLK3</i>     | 0                       | 0                                      | 0                                      | 0                                                  | 0            | 1                     | 0    |
| <i>KLKB1</i>    | 1                       | 0                                      | 0                                      | 0                                                  | 0            | 0                     | 0    |
| <i>KLRG1</i>    | 1                       | 0                                      | 0                                      | 0                                                  | 0            | 0                     | 0    |
| <i>KMT2D</i>    | 0                       | 0                                      | 0                                      | 0                                                  | 0            | 0                     | 1    |
| <i>KOS</i>      | 0                       | 0                                      | 0                                      | 0                                                  | 0            | 0                     | 1    |
| <i>KPNA1</i>    | 1                       | 0                                      | 0                                      | 0                                                  | 0            | 0                     | 0    |
| <i>KRAS</i>     | 0                       | 0                                      | 0                                      | 0                                                  | 0            | 0                     | 1    |
| <i>KRT76</i>    | 0                       | 0                                      | 0                                      | 0                                                  | 0            | 1                     | 0    |
| <i>KRT78</i>    | 0                       | 0                                      | 0                                      | 0                                                  | 0            | 1                     | 0    |
| <i>KRTCAP2</i>  | 1                       | 0                                      | 0                                      | 0                                                  | 0            | 0                     | 0    |
| <i>KY</i>       | 1                       | 0                                      | 0                                      | 0                                                  | 0            | 0                     | 0    |
| <i>L2HGA</i>    | 0                       | 0                                      | 0                                      | 0                                                  | 0            | 0                     | 1    |
| <i>LACHT</i>    | 0                       | 0                                      | 0                                      | 0                                                  | 0            | 0                     | 1    |



| Gene                 | Multi-omics integration | Gene-based result from AFGen 2017 GWAS | Gene-based result from AFGen 2018 GWAS | Meta-analysis of SNPs by two large AF GWAS in 2018 | GWAS catalog | Open Targets Platform | OMIM |
|----------------------|-------------------------|----------------------------------------|----------------------------------------|----------------------------------------------------|--------------|-----------------------|------|
| <i>LAMP1</i>         | 1                       | 0                                      | 0                                      | 0                                                  | 0            | 0                     | 0    |
| <i>LAP3</i>          | 0                       | 0                                      | 0                                      | 0                                                  | 0            | 1                     | 0    |
| <i>LAPTM4A</i>       | 0                       | 0                                      | 0                                      | 0                                                  | 0            | 1                     | 0    |
| <i>LAPTM4B</i>       | 1                       | 0                                      | 0                                      | 0                                                  | 0            | 0                     | 0    |
| <i>LARP4B</i>        | 1                       | 0                                      | 0                                      | 0                                                  | 0            | 0                     | 0    |
| <i>LAT</i>           | 0                       | 0                                      | 0                                      | 0                                                  | 0            | 1                     | 0    |
| <i>LAT2</i>          | 1                       | 0                                      | 0                                      | 0                                                  | 0            | 0                     | 0    |
| <i>LBR</i>           | 1                       | 0                                      | 0                                      | 0                                                  | 0            | 0                     | 0    |
| <i>LCA5L</i>         | 1                       | 0                                      | 0                                      | 0                                                  | 0            | 0                     | 0    |
| <i>LCN2</i>          | 0                       | 0                                      | 0                                      | 0                                                  | 0            | 1                     | 0    |
| <i>LDB1</i>          | 1                       | 0                                      | 0                                      | 0                                                  | 0            | 0                     | 0    |
| <i>LDB3</i>          | 0                       | 0                                      | 0                                      | 0                                                  | 0            | 0                     | 1    |
| <i>LDLR</i>          | 0                       | 0                                      | 0                                      | 0                                                  | 0            | 1                     | 0    |
| <i>LDS1</i>          | 0                       | 0                                      | 0                                      | 0                                                  | 0            | 0                     | 1    |
| <i>LDS2</i>          | 0                       | 0                                      | 0                                      | 0                                                  | 0            | 0                     | 1    |
| <i>LDS3</i>          | 0                       | 0                                      | 0                                      | 0                                                  | 0            | 0                     | 1    |
| <i>LDS5</i>          | 0                       | 0                                      | 0                                      | 0                                                  | 0            | 0                     | 1    |
| <i>LECT1</i>         | 0                       | 0                                      | 0                                      | 0                                                  | 0            | 0                     | 1    |
| <i>LEF1</i>          | 1                       | 0                                      | 0                                      | 0                                                  | 0            | 0                     | 0    |
| <i>LEKR1</i>         | 1                       | 0                                      | 0                                      | 0                                                  | 0            | 0                     | 0    |
| <i>LENEP</i>         | 1                       | 1                                      | 1                                      | 0                                                  | 0            | 0                     | 0    |
| <i>LEP</i>           | 0                       | 0                                      | 0                                      | 0                                                  | 0            | 1                     | 0    |
| <i>LEPR</i>          | 1                       | 0                                      | 0                                      | 0                                                  | 0            | 0                     | 0    |
| <i>LFNG</i>          | 1                       | 0                                      | 0                                      | 0                                                  | 0            | 0                     | 0    |
| <i>LGALS1</i>        | 0                       | 0                                      | 0                                      | 0                                                  | 0            | 1                     | 0    |
| <i>LGALS3</i>        | 0                       | 0                                      | 0                                      | 0                                                  | 0            | 1                     | 0    |
| <i>LGALS4</i>        | 1                       | 0                                      | 0                                      | 0                                                  | 0            | 0                     | 0    |
| <i>LGALS8</i>        | 1                       | 0                                      | 0                                      | 0                                                  | 0            | 0                     | 0    |
| <i>LGI3</i>          | 1                       | 0                                      | 0                                      | 0                                                  | 0            | 0                     | 0    |
| <i>LHFPL2</i>        | 1                       | 0                                      | 0                                      | 0                                                  | 0            | 0                     | 0    |
| <i>LHFPL3</i>        | 1                       | 0                                      | 0                                      | 0                                                  | 0            | 0                     | 0    |
| <i>LHPP</i>          | 1                       | 0                                      | 0                                      | 0                                                  | 0            | 0                     | 0    |
| <i>LHX3</i>          | 1                       | 0                                      | 0                                      | 1                                                  | 1            | 0                     | 0    |
| <i>LIMCH1</i>        | 1                       | 0                                      | 0                                      | 0                                                  | 0            | 0                     | 0    |
| <i>LIN54</i>         | 1                       | 1                                      | 1                                      | 1                                                  | 0            | 0                     | 0    |
| <i>LINC0047</i><br>7 | 0                       | 0                                      | 0                                      | 1                                                  | 0            | 0                     | 0    |
| <i>LINC0054</i><br>0 | 0                       | 0                                      | 0                                      | 1                                                  | 0            | 0                     | 0    |
| <i>LINC0062</i><br>1 | 0                       | 0                                      | 0                                      | 1                                                  | 0            | 0                     | 0    |
| <i>LINC0070</i><br>2 | 0                       | 0                                      | 0                                      | 0                                                  | 0            | 1                     | 0    |
| <i>LINC0084</i><br>4 | 0                       | 0                                      | 0                                      | 0                                                  | 0            | 1                     | 0    |

| Gene                    | Multi-omics integration | Gene-based result from AFGen 2017 GWAS | Gene-based result from AFGen 2018 GWAS | Meta-analysis of SNPs by two large AF GWAS in 2018 | GWAS catalog | Open Targets Platform | OMIM |
|-------------------------|-------------------------|----------------------------------------|----------------------------------------|----------------------------------------------------|--------------|-----------------------|------|
| <i>LINC0096</i><br>4    | 0                       | 0                                      | 0                                      | 1                                                  | 0            | 0                     | 0    |
| <i>LINC0114</i><br>2    | 0                       | 0                                      | 0                                      | 1                                                  | 0            | 0                     | 0    |
| <i>LINC0142</i><br>6    | 0                       | 0                                      | 0                                      | 1                                                  | 1            | 0                     | 0    |
| <i>LINC0168</i><br>1    | 0                       | 0                                      | 0                                      | 1                                                  | 0            | 0                     | 0    |
| <i>LIPC</i>             | 0                       | 0                                      | 0                                      | 0                                                  | 1            | 0                     | 0    |
| <i>LIPE</i>             | 1                       | 0                                      | 0                                      | 0                                                  | 0            | 0                     | 0    |
| <i>LMAN1</i>            | 1                       | 0                                      | 0                                      | 0                                                  | 0            | 0                     | 0    |
| <i>LMAN1L</i>           | 0                       | 0                                      | 0                                      | 0                                                  | 0            | 0                     | 1    |
| <i>LMNA</i>             | 0                       | 0                                      | 0                                      | 0                                                  | 0            | 1                     | 1    |
| <i>LMO1</i>             | 1                       | 0                                      | 0                                      | 0                                                  | 0            | 0                     | 0    |
| <i>LMO2</i>             | 1                       | 0                                      | 0                                      | 0                                                  | 0            | 0                     | 0    |
| <i>LMOD2</i>            | 0                       | 0                                      | 0                                      | 0                                                  | 0            | 1                     | 0    |
| <i>LMOD3</i>            | 1                       | 0                                      | 0                                      | 0                                                  | 0            | 0                     | 0    |
| <i>LMPH3</i>            | 0                       | 0                                      | 0                                      | 0                                                  | 0            | 0                     | 1    |
| <i>LMTK2</i>            | 0                       | 0                                      | 0                                      | 0                                                  | 0            | 1                     | 0    |
| <i>LNPEP</i>            | 1                       | 0                                      | 0                                      | 0                                                  | 0            | 1                     | 0    |
| <i>LNX2</i>             | 1                       | 0                                      | 0                                      | 0                                                  | 0            | 0                     | 0    |
| <i>LOC1001</i><br>28711 | 0                       | 0                                      | 0                                      | 0                                                  | 1            | 0                     | 0    |
| <i>LOC1001</i><br>30936 | 0                       | 0                                      | 0                                      | 0                                                  | 1            | 0                     | 0    |
| <i>LOC1004</i><br>22418 | 0                       | 0                                      | 0                                      | 0                                                  | 1            | 0                     | 0    |
| <i>LOC1019</i><br>26943 | 0                       | 0                                      | 0                                      | 0                                                  | 1            | 0                     | 0    |
| <i>LOC1019</i><br>28002 | 0                       | 0                                      | 0                                      | 0                                                  | 1            | 0                     | 0    |
| <i>LOC1019</i><br>28277 | 0                       | 0                                      | 0                                      | 1                                                  | 0            | 0                     | 0    |
| <i>LOC1019</i><br>28409 | 0                       | 0                                      | 0                                      | 0                                                  | 1            | 0                     | 0    |
| <i>LOC1019</i><br>28478 | 0                       | 0                                      | 0                                      | 0                                                  | 1            | 0                     | 0    |
| <i>LOC1019</i><br>28694 | 0                       | 0                                      | 0                                      | 0                                                  | 1            | 0                     | 0    |
| <i>LOC1019</i><br>29560 | 0                       | 0                                      | 0                                      | 0                                                  | 1            | 0                     | 0    |
| <i>LOC1024</i><br>67213 | 0                       | 0                                      | 0                                      | 1                                                  | 1            | 0                     | 0    |
| <i>LOC1027</i><br>23321 | 0                       | 0                                      | 0                                      | 0                                                  | 1            | 0                     | 0    |
| <i>LOC1027</i><br>23694 | 0                       | 0                                      | 0                                      | 1                                                  | 1            | 0                     | 0    |
| <i>LOC1027</i>          | 0                       | 0                                      | 0                                      | 0                                                  | 1            | 0                     | 0    |

| Gene                | Multi-omics integration | Gene-based result from AFGen 2017 GWAS | Gene-based result from AFGen 2018 GWAS | Meta-analysis of SNPs by two large AF GWAS in 2018 | GWAS catalog | Open Targets Platform | OMIM |
|---------------------|-------------------------|----------------------------------------|----------------------------------------|----------------------------------------------------|--------------|-----------------------|------|
| 24233               |                         |                                        |                                        |                                                    |              |                       |      |
| <i>LOC102725112</i> | 0                       | 0                                      | 0                                      | 0                                                  | 1            | 0                     | 0    |
| <i>LOC105369439</i> | 0                       | 0                                      | 0                                      | 1                                                  | 0            | 0                     | 0    |
| <i>LOC105369698</i> | 0                       | 0                                      | 0                                      | 0                                                  | 1            | 0                     | 0    |
| <i>LOC105369823</i> | 0                       | 0                                      | 0                                      | 0                                                  | 1            | 0                     | 0    |
| <i>LOC105369846</i> | 0                       | 0                                      | 0                                      | 0                                                  | 1            | 0                     | 0    |
| <i>LOC105370578</i> | 0                       | 0                                      | 0                                      | 0                                                  | 1            | 0                     | 0    |
| <i>LOC105371449</i> | 0                       | 0                                      | 0                                      | 0                                                  | 1            | 0                     | 0    |
| <i>LOC105371609</i> | 0                       | 0                                      | 0                                      | 0                                                  | 1            | 0                     | 0    |
| <i>LOC105371610</i> | 0                       | 0                                      | 0                                      | 1                                                  | 1            | 0                     | 0    |
| <i>LOC105371884</i> | 0                       | 0                                      | 0                                      | 0                                                  | 1            | 0                     | 0    |
| <i>LOC105372516</i> | 0                       | 0                                      | 0                                      | 0                                                  | 1            | 0                     | 0    |
| <i>LOC105373666</i> | 0                       | 0                                      | 0                                      | 0                                                  | 1            | 0                     | 0    |
| <i>LOC105373673</i> | 0                       | 0                                      | 0                                      | 0                                                  | 1            | 0                     | 0    |
| <i>LOC105374040</i> | 0                       | 0                                      | 0                                      | 0                                                  | 1            | 0                     | 0    |
| <i>LOC105374317</i> | 0                       | 0                                      | 0                                      | 0                                                  | 1            | 0                     | 0    |
| <i>LOC105374478</i> | 0                       | 0                                      | 0                                      | 0                                                  | 1            | 0                     | 0    |
| <i>LOC105374778</i> | 0                       | 0                                      | 0                                      | 0                                                  | 1            | 0                     | 0    |
| <i>LOC105375743</i> | 0                       | 0                                      | 0                                      | 0                                                  | 1            | 0                     | 0    |
| <i>LOC105375746</i> | 0                       | 0                                      | 0                                      | 0                                                  | 1            | 0                     | 0    |
| <i>LOC105376270</i> | 0                       | 0                                      | 0                                      | 0                                                  | 1            | 0                     | 0    |
| <i>LOC105376440</i> | 0                       | 0                                      | 0                                      | 0                                                  | 1            | 0                     | 0    |
| <i>LOC105377362</i> | 0                       | 0                                      | 0                                      | 1                                                  | 1            | 0                     | 0    |
| <i>LOC105377363</i> | 0                       | 0                                      | 0                                      | 0                                                  | 1            | 0                     | 0    |
| <i>LOC105377364</i> | 0                       | 0                                      | 0                                      | 1                                                  | 1            | 0                     | 0    |
| <i>LOC1053</i>      | 0                       | 0                                      | 0                                      | 0                                                  | 1            | 0                     | 0    |

| Gene                | Multi-omics integration | Gene-based result from AFGen 2017 GWAS | Gene-based result from AFGen 2018 GWAS | Meta-analysis of SNPs by two large AF GWAS in 2018 | GWAS catalog | Open Targets Platform | OMIM |
|---------------------|-------------------------|----------------------------------------|----------------------------------------|----------------------------------------------------|--------------|-----------------------|------|
| <i>77366</i>        |                         |                                        |                                        |                                                    |              |                       |      |
| <i>LOC105377367</i> | 0                       | 0                                      | 0                                      | 1                                                  | 1            | 0                     | 0    |
| <i>LOC105377621</i> | 0                       | 0                                      | 0                                      | 0                                                  | 1            | 0                     | 0    |
| <i>LOC105377731</i> | 0                       | 0                                      | 0                                      | 0                                                  | 1            | 0                     | 0    |
| <i>LOC105377979</i> | 0                       | 0                                      | 0                                      | 1                                                  | 1            | 0                     | 0    |
| <i>LOC105378208</i> | 0                       | 0                                      | 0                                      | 0                                                  | 1            | 0                     | 0    |
| <i>LOC105378360</i> | 0                       | 0                                      | 0                                      | 0                                                  | 1            | 0                     | 0    |
| <i>LOC105379168</i> | 0                       | 0                                      | 0                                      | 0                                                  | 1            | 0                     | 0    |
| <i>LOC105379242</i> | 0                       | 0                                      | 0                                      | 0                                                  | 1            | 0                     | 0    |
| <i>LOC105379311</i> | 0                       | 0                                      | 0                                      | 0                                                  | 1            | 0                     | 0    |
| <i>LOC107984029</i> | 0                       | 0                                      | 0                                      | 0                                                  | 1            | 0                     | 0    |
| <i>LOC107984402</i> | 0                       | 0                                      | 0                                      | 0                                                  | 1            | 0                     | 0    |
| <i>LOC107984628</i> | 0                       | 0                                      | 0                                      | 0                                                  | 1            | 0                     | 0    |
| <i>LOC107984728</i> | 0                       | 0                                      | 0                                      | 0                                                  | 1            | 0                     | 0    |
| <i>LOC107984734</i> | 0                       | 0                                      | 0                                      | 0                                                  | 1            | 0                     | 0    |
| <i>LOC107984788</i> | 0                       | 0                                      | 0                                      | 0                                                  | 1            | 0                     | 0    |
| <i>LOC107985401</i> | 0                       | 0                                      | 0                                      | 0                                                  | 1            | 0                     | 0    |
| <i>LOC107986203</i> | 0                       | 0                                      | 0                                      | 0                                                  | 1            | 0                     | 0    |
| <i>LOC107986773</i> | 0                       | 0                                      | 0                                      | 0                                                  | 1            | 0                     | 0    |
| <i>LOC341056</i>    | 0                       | 0                                      | 0                                      | 0                                                  | 1            | 0                     | 0    |
| <i>LOC729200</i>    | 0                       | 0                                      | 0                                      | 0                                                  | 1            | 0                     | 0    |
| <i>LOR</i>          | 0                       | 0                                      | 0                                      | 0                                                  | 0            | 1                     | 0    |
| <i>LOX</i>          | 0                       | 0                                      | 0                                      | 0                                                  | 0            | 1                     | 0    |
| <i>LPA</i>          | 0                       | 0                                      | 0                                      | 0                                                  | 0            | 1                     | 0    |
| <i>LPL</i>          | 0                       | 0                                      | 0                                      | 0                                                  | 1            | 1                     | 0    |
| <i>LPP</i>          | 0                       | 0                                      | 0                                      | 0                                                  | 0            | 1                     | 0    |
| <i>LPRD1</i>        | 0                       | 0                                      | 0                                      | 0                                                  | 0            | 0                     | 1    |
| <i>LQTI</i>         | 0                       | 0                                      | 0                                      | 0                                                  | 0            | 0                     | 1    |
| <i>LQT10</i>        | 0                       | 0                                      | 0                                      | 0                                                  | 0            | 0                     | 1    |

| Gene           | Multi-omics integration | Gene-based result from AFGen 2017 GWAS | Gene-based result from AFGen 2018 GWAS | Meta-analysis of SNPs by two large AF GWAS in 2018 | GWAS catalog | Open Targets Platform | OMIM |
|----------------|-------------------------|----------------------------------------|----------------------------------------|----------------------------------------------------|--------------|-----------------------|------|
| <i>LQT12</i>   | 0                       | 0                                      | 0                                      | 0                                                  | 0            | 0                     | 1    |
| <i>LQT13</i>   | 0                       | 0                                      | 0                                      | 0                                                  | 0            | 0                     | 1    |
| <i>LQT14</i>   | 0                       | 0                                      | 0                                      | 0                                                  | 0            | 0                     | 1    |
| <i>LQT15</i>   | 0                       | 0                                      | 0                                      | 0                                                  | 0            | 0                     | 1    |
| <i>LQT2</i>    | 0                       | 0                                      | 0                                      | 0                                                  | 0            | 0                     | 1    |
| <i>LQT3</i>    | 0                       | 0                                      | 0                                      | 0                                                  | 0            | 0                     | 1    |
| <i>LQT5</i>    | 0                       | 0                                      | 0                                      | 0                                                  | 0            | 0                     | 1    |
| <i>LQT6</i>    | 0                       | 0                                      | 0                                      | 0                                                  | 0            | 0                     | 1    |
| <i>LRCH1</i>   | 1                       | 0                                      | 1                                      | 1                                                  | 0            | 0                     | 0    |
| <i>LRIG1</i>   | 1                       | 0                                      | 1                                      | 1                                                  | 1            | 1                     | 0    |
| <i>LRMDA</i>   | 0                       | 0                                      | 0                                      | 0                                                  | 0            | 1                     | 0    |
| <i>LRP12</i>   | 1                       | 0                                      | 0                                      | 0                                                  | 0            | 0                     | 0    |
| <i>LRP3</i>    | 1                       | 0                                      | 0                                      | 0                                                  | 0            | 0                     | 0    |
| <i>LRPAP1</i>  | 0                       | 0                                      | 0                                      | 0                                                  | 0            | 1                     | 0    |
| <i>LRRC1</i>   | 1                       | 0                                      | 0                                      | 0                                                  | 0            | 0                     | 0    |
| <i>LRRC10</i>  | 0                       | 0                                      | 1                                      | 1                                                  | 1            | 0                     | 0    |
| <i>LRRC3</i>   | 1                       | 0                                      | 0                                      | 0                                                  | 0            | 0                     | 0    |
| <i>LRRC45</i>  | 1                       | 0                                      | 0                                      | 0                                                  | 0            | 0                     | 0    |
| <i>LRRC63</i>  | 0                       | 0                                      | 0                                      | 0                                                  | 1            | 1                     | 0    |
| <i>LRRFIP1</i> | 1                       | 0                                      | 0                                      | 0                                                  | 0            | 0                     | 0    |
| <i>LRRN2</i>   | 1                       | 0                                      | 0                                      | 0                                                  | 0            | 0                     | 0    |
| <i>LRRN4</i>   | 0                       | 0                                      | 0                                      | 0                                                  | 0            | 1                     | 0    |
| <i>LRS</i>     | 0                       | 0                                      | 0                                      | 0                                                  | 0            | 0                     | 1    |
| <i>LSDMCA1</i> | 0                       | 0                                      | 0                                      | 0                                                  | 0            | 0                     | 1    |
| <i>LSDMCA2</i> | 0                       | 0                                      | 0                                      | 0                                                  | 0            | 0                     | 1    |
| <i>LSDMCA3</i> | 0                       | 0                                      | 0                                      | 0                                                  | 0            | 0                     | 1    |
| <i>LSG1</i>    | 1                       | 0                                      | 0                                      | 0                                                  | 0            | 0                     | 0    |
| <i>LSM14A</i>  | 1                       | 0                                      | 0                                      | 0                                                  | 0            | 0                     | 0    |
| <i>LSM2</i>    | 1                       | 0                                      | 0                                      | 0                                                  | 0            | 0                     | 0    |
| <i>LSM4</i>    | 1                       | 0                                      | 0                                      | 0                                                  | 0            | 0                     | 0    |
| <i>LSP1</i>    | 1                       | 0                                      | 0                                      | 0                                                  | 0            | 0                     | 0    |
| <i>LST1</i>    | 1                       | 0                                      | 0                                      | 0                                                  | 0            | 0                     | 0    |
| <i>LTA</i>     | 1                       | 0                                      | 0                                      | 0                                                  | 0            | 0                     | 0    |
| <i>LTB</i>     | 1                       | 0                                      | 0                                      | 0                                                  | 0            | 0                     | 0    |
| <i>LTBP3</i>   | 1                       | 0                                      | 0                                      | 0                                                  | 0            | 0                     | 0    |
| <i>LTBP4</i>   | 0                       | 0                                      | 0                                      | 0                                                  | 0            | 0                     | 1    |
| <i>LTF</i>     | 1                       | 0                                      | 0                                      | 0                                                  | 0            | 0                     | 0    |
| <i>LVNC1</i>   | 0                       | 0                                      | 0                                      | 0                                                  | 0            | 0                     | 1    |
| <i>LVNC8</i>   | 0                       | 0                                      | 0                                      | 0                                                  | 0            | 0                     | 1    |
| <i>LY6G5C</i>  | 1                       | 0                                      | 0                                      | 0                                                  | 0            | 0                     | 0    |
| <i>LY6G6C</i>  | 1                       | 0                                      | 0                                      | 0                                                  | 0            | 0                     | 0    |
| <i>LY6G6D</i>  | 1                       | 0                                      | 0                                      | 0                                                  | 0            | 0                     | 0    |
| <i>LY86</i>    | 0                       | 0                                      | 0                                      | 0                                                  | 0            | 1                     | 0    |
| <i>LY96</i>    | 0                       | 0                                      | 0                                      | 0                                                  | 1            | 1                     | 0    |

| Gene            | Multi-omics integration | Gene-based result from AFGen 2017 GWAS | Gene-based result from AFGen 2018 GWAS | Meta-analysis of SNPs by two large AF GWAS in 2018 | GWAS catalog | Open Targets Platform | OMIM |
|-----------------|-------------------------|----------------------------------------|----------------------------------------|----------------------------------------------------|--------------|-----------------------|------|
| <i>LYPLA2</i>   | 1                       | 0                                      | 0                                      | 0                                                  | 0            | 0                     | 0    |
| <i>LYSMD3</i>   | 1                       | 0                                      | 0                                      | 0                                                  | 0            | 0                     | 0    |
| <i>LYSMD4</i>   | 1                       | 0                                      | 0                                      | 0                                                  | 0            | 0                     | 0    |
| <i>LYST</i>     | 0                       | 0                                      | 0                                      | 0                                                  | 0            | 1                     | 0    |
| <i>LYVE1</i>    | 0                       | 0                                      | 0                                      | 0                                                  | 0            | 1                     | 0    |
| <i>MACF1</i>    | 1                       | 0                                      | 0                                      | 0                                                  | 0            | 0                     | 0    |
| <i>MACROD2</i>  | 0                       | 0                                      | 0                                      | 0                                                  | 0            | 1                     | 0    |
| <i>MAD2L1</i>   | 1                       | 0                                      | 0                                      | 0                                                  | 0            | 0                     | 0    |
| <i>MAF</i>      | 0                       | 0                                      | 0                                      | 0                                                  | 0            | 1                     | 0    |
| <i>MAFB</i>     | 1                       | 0                                      | 0                                      | 0                                                  | 0            | 0                     | 0    |
| <i>MAFG</i>     | 1                       | 0                                      | 0                                      | 0                                                  | 0            | 0                     | 0    |
| <i>MAG</i>      | 0                       | 0                                      | 0                                      | 0                                                  | 0            | 1                     | 0    |
| <i>MAH CJ</i>   | 0                       | 0                                      | 0                                      | 0                                                  | 0            | 0                     | 1    |
| <i>MAML3</i>    | 0                       | 0                                      | 0                                      | 0                                                  | 1            | 1                     | 0    |
| <i>MAN1A2</i>   | 1                       | 0                                      | 0                                      | 0                                                  | 0            | 0                     | 0    |
| <i>MAN2A1</i>   | 1                       | 0                                      | 0                                      | 0                                                  | 0            | 0                     | 0    |
| <i>MAN2A2</i>   | 1                       | 0                                      | 0                                      | 0                                                  | 0            | 0                     | 0    |
| <i>MAN2C1</i>   | 1                       | 0                                      | 0                                      | 0                                                  | 0            | 0                     | 0    |
| <i>MANBA</i>    | 1                       | 0                                      | 1                                      | 0                                                  | 0            | 0                     | 0    |
| <i>MAP1B</i>    | 0                       | 0                                      | 0                                      | 0                                                  | 0            | 1                     | 0    |
| <i>MAP2K4</i>   | 0                       | 0                                      | 0                                      | 0                                                  | 0            | 1                     | 0    |
| <i>MAP3K1</i>   | 0                       | 0                                      | 0                                      | 0                                                  | 0            | 1                     | 0    |
| <i>MAP3K11</i>  | 1                       | 0                                      | 0                                      | 0                                                  | 0            | 0                     | 0    |
| <i>MAP3K14</i>  | 1                       | 0                                      | 0                                      | 0                                                  | 0            | 0                     | 0    |
| <i>MAP3K20</i>  | 0                       | 0                                      | 0                                      | 0                                                  | 0            | 1                     | 0    |
| <i>MAP3K3</i>   | 1                       | 0                                      | 0                                      | 0                                                  | 0            | 0                     | 0    |
| <i>MAP4K4</i>   | 1                       | 0                                      | 0                                      | 0                                                  | 0            | 0                     | 0    |
| <i>MAP6</i>     | 0                       | 0                                      | 0                                      | 0                                                  | 0            | 1                     | 0    |
| <i>MAP9</i>     | 0                       | 0                                      | 0                                      | 0                                                  | 0            | 1                     | 0    |
| <i>MAPK1</i>    | 0                       | 0                                      | 0                                      | 0                                                  | 0            | 1                     | 0    |
| <i>MAPK11</i>   | 1                       | 0                                      | 0                                      | 0                                                  | 0            | 0                     | 0    |
| <i>MAPK12</i>   | 1                       | 0                                      | 0                                      | 0                                                  | 0            | 0                     | 0    |
| <i>MAPK13</i>   | 1                       | 0                                      | 0                                      | 0                                                  | 0            | 0                     | 0    |
| <i>MAPK14</i>   | 1                       | 0                                      | 0                                      | 0                                                  | 0            | 0                     | 0    |
| <i>MAPK3</i>    | 0                       | 0                                      | 0                                      | 0                                                  | 0            | 1                     | 0    |
| <i>MAPK8IP3</i> | 1                       | 0                                      | 0                                      | 0                                                  | 0            | 0                     | 0    |
| <i>MAPK9</i>    | 0                       | 0                                      | 0                                      | 0                                                  | 0            | 1                     | 0    |
| <i>MAPRE2</i>   | 1                       | 0                                      | 0                                      | 0                                                  | 0            | 0                     | 0    |
| <i>MAPT</i>     | 1                       | 0                                      | 0                                      | 0                                                  | 1            | 1                     | 0    |
| <i>MARCH2</i>   | 1                       | 0                                      | 0                                      | 0                                                  | 0            | 0                     | 0    |
| <i>MARCH6</i>   | 0                       | 0                                      | 0                                      | 0                                                  | 0            | 1                     | 0    |
| <i>MARCH7</i>   | 1                       | 0                                      | 0                                      | 0                                                  | 0            | 0                     | 0    |

| Gene            | Multi-omics integration | Gene-based result from AFGen 2017 GWAS | Gene-based result from AFGen 2018 GWAS | Meta-analysis of SNPs by two large AF GWAS in 2018 | GWAS catalog | Open Targets Platform | OMIM |
|-----------------|-------------------------|----------------------------------------|----------------------------------------|----------------------------------------------------|--------------|-----------------------|------|
| <i>MARS2</i>    | 1                       | 0                                      | 0                                      | 0                                                  | 0            | 0                     | 0    |
| <i>MASIL</i>    | 1                       | 0                                      | 0                                      | 0                                                  | 0            | 0                     | 0    |
| <i>MASPI</i>    | 0                       | 0                                      | 0                                      | 0                                                  | 0            | 0                     | 1    |
| <i>MATN1</i>    | 0                       | 0                                      | 0                                      | 0                                                  | 0            | 1                     | 0    |
| <i>MATN2</i>    | 1                       | 0                                      | 0                                      | 0                                                  | 0            | 0                     | 0    |
| <i>MAX</i>      | 0                       | 0                                      | 0                                      | 0                                                  | 0            | 1                     | 0    |
| <i>MB</i>       | 0                       | 0                                      | 0                                      | 0                                                  | 0            | 1                     | 0    |
| <i>MBD5</i>     | 1                       | 0                                      | 1                                      | 0                                                  | 1            | 1                     | 0    |
| <i>MBTD1</i>    | 1                       | 0                                      | 0                                      | 0                                                  | 0            | 0                     | 0    |
| <i>MBTPS2</i>   | 0                       | 0                                      | 0                                      | 0                                                  | 0            | 0                     | 1    |
| <i>MCAHS1</i>   | 0                       | 0                                      | 0                                      | 0                                                  | 0            | 0                     | 1    |
| <i>MCAHS2</i>   | 0                       | 0                                      | 0                                      | 0                                                  | 0            | 0                     | 1    |
| <i>MCAP</i>     | 0                       | 0                                      | 0                                      | 0                                                  | 0            | 0                     | 1    |
| <i>MCAT</i>     | 0                       | 0                                      | 0                                      | 0                                                  | 0            | 1                     | 0    |
| <i>MCIDAS</i>   | 0                       | 0                                      | 0                                      | 0                                                  | 0            | 1                     | 0    |
| <i>MCLDS</i>    | 0                       | 0                                      | 0                                      | 0                                                  | 0            | 0                     | 1    |
| <i>MCLMR</i>    | 0                       | 0                                      | 0                                      | 0                                                  | 0            | 0                     | 1    |
| <i>MCOLN1</i>   | 0                       | 0                                      | 0                                      | 0                                                  | 0            | 1                     | 0    |
| <i>MCOLN2</i>   | 0                       | 0                                      | 0                                      | 0                                                  | 0            | 1                     | 0    |
| <i>MCOLN3</i>   | 0                       | 0                                      | 0                                      | 0                                                  | 0            | 1                     | 0    |
| <i>MCOP8</i>    | 0                       | 0                                      | 0                                      | 0                                                  | 0            | 0                     | 1    |
| <i>MCOPCB10</i> | 0                       | 0                                      | 0                                      | 0                                                  | 0            | 0                     | 1    |
| <i>MCOPS12</i>  | 0                       | 0                                      | 0                                      | 0                                                  | 0            | 0                     | 1    |
| <i>MCOPS2</i>   | 0                       | 0                                      | 0                                      | 0                                                  | 0            | 0                     | 1    |
| <i>MCOPS3</i>   | 0                       | 0                                      | 0                                      | 0                                                  | 0            | 0                     | 1    |
| <i>MCOPS9</i>   | 0                       | 0                                      | 0                                      | 0                                                  | 0            | 0                     | 1    |
| <i>MCRS1</i>    | 1                       | 0                                      | 0                                      | 0                                                  | 0            | 0                     | 0    |
| <i>MCT1D</i>    | 0                       | 0                                      | 0                                      | 0                                                  | 0            | 0                     | 1    |
| <i>MCTP2</i>    | 1                       | 0                                      | 0                                      | 0                                                  | 0            | 0                     | 0    |
| <i>MDCMC</i>    | 0                       | 0                                      | 0                                      | 0                                                  | 0            | 0                     | 1    |
| <i>MDDGA4</i>   | 0                       | 0                                      | 0                                      | 0                                                  | 0            | 0                     | 1    |
| <i>MDLS</i>     | 0                       | 0                                      | 0                                      | 0                                                  | 0            | 0                     | 1    |
| <i>MDM4</i>     | 1                       | 0                                      | 0                                      | 0                                                  | 0            | 0                     | 0    |
| <i>ME1</i>      | 1                       | 0                                      | 0                                      | 0                                                  | 0            | 0                     | 0    |
| <i>ME2</i>      | 1                       | 0                                      | 0                                      | 0                                                  | 0            | 0                     | 0    |
| <i>MECP2</i>    | 0                       | 0                                      | 0                                      | 0                                                  | 0            | 1                     | 0    |
| <i>MECRCN</i>   | 0                       | 0                                      | 0                                      | 0                                                  | 0            | 0                     | 1    |
| <i>MED1</i>     | 1                       | 0                                      | 0                                      | 0                                                  | 0            | 0                     | 0    |
| <i>MED13L</i>   | 1                       | 0                                      | 0                                      | 0                                                  | 0            | 0                     | 0    |
| <i>MED24</i>    | 1                       | 1                                      | 0                                      | 0                                                  | 0            | 0                     | 0    |
| <i>MEF2A</i>    | 1                       | 0                                      | 0                                      | 0                                                  | 0            | 0                     | 1    |
| <i>MEF2C</i>    | 1                       | 0                                      | 0                                      | 0                                                  | 0            | 0                     | 0    |
| <i>MEF2D</i>    | 1                       | 0                                      | 0                                      | 0                                                  | 0            | 0                     | 0    |

| Gene            | Multi-omics integration | Gene-based result from AFGen 2017 GWAS | Gene-based result from AFGen 2018 GWAS | Meta-analysis of SNPs by two large AF GWAS in 2018 | GWAS catalog | Open Targets Platform | OMIM |
|-----------------|-------------------------|----------------------------------------|----------------------------------------|----------------------------------------------------|--------------|-----------------------|------|
| <i>MEGF8</i>    | 1                       | 0                                      | 0                                      | 0                                                  | 0            | 0                     | 0    |
| <i>MEIS1</i>    | 1                       | 0                                      | 0                                      | 0                                                  | 0            | 0                     | 0    |
| <i>MEIS2</i>    | 1                       | 0                                      | 0                                      | 0                                                  | 0            | 0                     | 1    |
| <i>MELAS</i>    | 0                       | 0                                      | 0                                      | 0                                                  | 0            | 0                     | 1    |
| <i>MEPCE</i>    | 1                       | 0                                      | 0                                      | 0                                                  | 0            | 0                     | 0    |
| <i>METRNL</i>   | 1                       | 0                                      | 0                                      | 0                                                  | 0            | 0                     | 0    |
| <i>METRNL</i>   | 1                       | 0                                      | 0                                      | 0                                                  | 0            | 0                     | 0    |
| <i>METTL11B</i> | 0                       | 0                                      | 0                                      | 0                                                  | 0            | 1                     | 0    |
| <i>METTL7B</i>  | 1                       | 0                                      | 0                                      | 0                                                  | 1            | 0                     | 0    |
| <i>MEX3C</i>    | 0                       | 0                                      | 1                                      | 1                                                  | 1            | 1                     | 0    |
| <i>MFAP2</i>    | 1                       | 0                                      | 0                                      | 0                                                  | 0            | 0                     | 0    |
| <i>MFDGA</i>    | 0                       | 0                                      | 0                                      | 0                                                  | 0            | 0                     | 1    |
| <i>MFF</i>      | 0                       | 0                                      | 0                                      | 0                                                  | 0            | 1                     | 0    |
| <i>MFHAS1</i>   | 1                       | 0                                      | 0                                      | 0                                                  | 0            | 0                     | 0    |
| <i>MFM1</i>     | 0                       | 0                                      | 0                                      | 0                                                  | 0            | 0                     | 1    |
| <i>MFM4</i>     | 0                       | 0                                      | 0                                      | 0                                                  | 0            | 0                     | 1    |
| <i>MFN1</i>     | 1                       | 0                                      | 0                                      | 0                                                  | 0            | 0                     | 0    |
| <i>MFRG</i>     | 0                       | 0                                      | 0                                      | 0                                                  | 0            | 0                     | 1    |
| <i>MFSD2A</i>   | 1                       | 0                                      | 0                                      | 0                                                  | 0            | 0                     | 0    |
| <i>MGAT3</i>    | 1                       | 0                                      | 0                                      | 0                                                  | 0            | 0                     | 0    |
| <i>MGORS7</i>   | 0                       | 0                                      | 0                                      | 0                                                  | 0            | 0                     | 1    |
| <i>MHS1</i>     | 0                       | 0                                      | 0                                      | 0                                                  | 0            | 0                     | 1    |
| <i>MICAL3</i>   | 0                       | 0                                      | 0                                      | 0                                                  | 0            | 1                     | 0    |
| <i>MICALCL</i>  | 1                       | 0                                      | 0                                      | 0                                                  | 0            | 0                     | 0    |
| <i>MICB</i>     | 1                       | 0                                      | 0                                      | 0                                                  | 0            | 1                     | 0    |
| <i>MICCAP</i>   | 0                       | 0                                      | 0                                      | 0                                                  | 0            | 0                     | 1    |
| <i>MID1</i>     | 0                       | 0                                      | 0                                      | 0                                                  | 0            | 0                     | 1    |
| <i>MIF</i>      | 0                       | 0                                      | 0                                      | 0                                                  | 0            | 1                     | 0    |
| <i>MIR1-1HG</i> | 0                       | 0                                      | 0                                      | 0                                                  | 1            | 0                     | 0    |
| <i>MIR1-2</i>   | 0                       | 0                                      | 0                                      | 0                                                  | 0            | 0                     | 1    |
| <i>MIR133A1</i> | 0                       | 0                                      | 0                                      | 0                                                  | 0            | 0                     | 1    |
| <i>MIR133A2</i> | 0                       | 0                                      | 0                                      | 0                                                  | 0            | 0                     | 1    |
| <i>MIR208A</i>  | 0                       | 0                                      | 0                                      | 0                                                  | 0            | 0                     | 1    |
| <i>MIR26A1</i>  | 0                       | 0                                      | 0                                      | 0                                                  | 0            | 0                     | 1    |
| <i>MIR297</i>   | 0                       | 0                                      | 0                                      | 0                                                  | 1            | 1                     | 0    |
| <i>MIR6500</i>  | 0                       | 0                                      | 0                                      | 1                                                  | 1            | 0                     | 0    |
| <i>MITF</i>     | 1                       | 0                                      | 0                                      | 0                                                  | 0            | 0                     | 0    |
| <i>MKI67</i>    | 1                       | 0                                      | 0                                      | 0                                                  | 0            | 0                     | 0    |
| <i>MKRN2</i>    | 1                       | 0                                      | 1                                      | 0                                                  | 0            | 0                     | 0    |
| <i>MLIP</i>     | 0                       | 0                                      | 0                                      | 0                                                  | 0            | 0                     | 1    |
| <i>MLLT3</i>    | 0                       | 0                                      | 0                                      | 0                                                  | 0            | 1                     | 0    |
| <i>MLRD</i>     | 0                       | 0                                      | 0                                      | 0                                                  | 0            | 0                     | 1    |



| Gene          | Multi-omics integration | Gene-based result from AFGen 2017 GWAS | Gene-based result from AFGen 2018 GWAS | Meta-analysis of SNPs by two large AF GWAS in 2018 | GWAS catalog | Open Targets Platform | OMIM |
|---------------|-------------------------|----------------------------------------|----------------------------------------|----------------------------------------------------|--------------|-----------------------|------|
| <i>MLST8</i>  | 1                       | 0                                      | 0                                      | 0                                                  | 0            | 0                     | 0    |
| <i>MLXIP</i>  | 1                       | 0                                      | 0                                      | 0                                                  | 0            | 0                     | 0    |
| <i>MLXIPL</i> | 0                       | 0                                      | 0                                      | 0                                                  | 1            | 1                     | 0    |
| <i>MMAB</i>   | 1                       | 0                                      | 0                                      | 0                                                  | 0            | 0                     | 0    |
| <i>MMD1</i>   | 0                       | 0                                      | 0                                      | 0                                                  | 0            | 0                     | 1    |
| <i>MME</i>    | 0                       | 0                                      | 0                                      | 0                                                  | 0            | 1                     | 1    |
| <i>MMP1</i>   | 0                       | 0                                      | 0                                      | 0                                                  | 0            | 1                     | 0    |
| <i>MMP11</i>  | 1                       | 0                                      | 0                                      | 0                                                  | 0            | 0                     | 0    |
| <i>MMP12</i>  | 0                       | 0                                      | 0                                      | 0                                                  | 0            | 1                     | 0    |
| <i>MMP13</i>  | 0                       | 0                                      | 0                                      | 0                                                  | 0            | 1                     | 0    |
| <i>MMP17</i>  | 1                       | 0                                      | 0                                      | 0                                                  | 0            | 0                     | 0    |
| <i>MMP19</i>  | 0                       | 0                                      | 0                                      | 0                                                  | 0            | 1                     | 0    |
| <i>MMP2</i>   | 0                       | 0                                      | 0                                      | 0                                                  | 0            | 1                     | 0    |
| <i>MMP21</i>  | 0                       | 0                                      | 0                                      | 0                                                  | 0            | 0                     | 1    |
| <i>MMP28</i>  | 0                       | 0                                      | 0                                      | 0                                                  | 0            | 1                     | 0    |
| <i>MMP3</i>   | 0                       | 0                                      | 0                                      | 0                                                  | 0            | 1                     | 0    |
| <i>MMP7</i>   | 0                       | 0                                      | 0                                      | 0                                                  | 0            | 1                     | 0    |
| <i>MMP9</i>   | 0                       | 0                                      | 0                                      | 0                                                  | 0            | 1                     | 0    |
| <i>MMRNI</i>  | 0                       | 0                                      | 0                                      | 0                                                  | 0            | 1                     | 0    |
| <i>MMUT</i>   | 0                       | 0                                      | 0                                      | 0                                                  | 0            | 1                     | 0    |
| <i>MNAT1</i>  | 1                       | 0                                      | 0                                      | 0                                                  | 0            | 0                     | 0    |
| <i>MNKES</i>  | 0                       | 0                                      | 0                                      | 0                                                  | 0            | 0                     | 1    |
| <i>MNS</i>    | 0                       | 0                                      | 0                                      | 0                                                  | 0            | 0                     | 1    |
| <i>MOB3B</i>  | 0                       | 0                                      | 0                                      | 0                                                  | 0            | 1                     | 0    |
| <i>MOGAT1</i> | 1                       | 0                                      | 0                                      | 0                                                  | 0            | 0                     | 0    |
| <i>MOPD1</i>  | 0                       | 0                                      | 0                                      | 0                                                  | 0            | 0                     | 1    |
| <i>MORC3</i>  | 1                       | 0                                      | 0                                      | 0                                                  | 0            | 0                     | 0    |
| <i>MOWS</i>   | 0                       | 0                                      | 0                                      | 0                                                  | 0            | 0                     | 1    |
| <i>MPD1</i>   | 0                       | 0                                      | 0                                      | 0                                                  | 0            | 0                     | 1    |
| <i>MPDUI</i>  | 1                       | 0                                      | 1                                      | 0                                                  | 0            | 0                     | 0    |
| <i>MPI</i>    | 0                       | 0                                      | 0                                      | 0                                                  | 0            | 1                     | 0    |
| <i>MPL</i>    | 0                       | 0                                      | 0                                      | 0                                                  | 0            | 1                     | 0    |
| <i>MPO</i>    | 1                       | 0                                      | 0                                      | 0                                                  | 0            | 1                     | 1    |
| <i>MPP2</i>   | 0                       | 0                                      | 0                                      | 0                                                  | 0            | 1                     | 0    |
| <i>MPPED2</i> | 1                       | 0                                      | 1                                      | 0                                                  | 0            | 0                     | 0    |
| <i>MPPH1</i>  | 0                       | 0                                      | 0                                      | 0                                                  | 0            | 0                     | 1    |
| <i>MPSPS</i>  | 0                       | 0                                      | 0                                      | 0                                                  | 0            | 0                     | 1    |
| <i>MRAP</i>   | 0                       | 0                                      | 0                                      | 0                                                  | 0            | 1                     | 0    |
| <i>MRC1</i>   | 0                       | 0                                      | 0                                      | 0                                                  | 0            | 1                     | 0    |
| <i>MRD21</i>  | 0                       | 0                                      | 0                                      | 0                                                  | 0            | 0                     | 1    |
| <i>MRD26</i>  | 0                       | 0                                      | 0                                      | 0                                                  | 0            | 0                     | 1    |
| <i>MRD32</i>  | 0                       | 0                                      | 0                                      | 0                                                  | 0            | 0                     | 1    |
| <i>MRPL14</i> | 1                       | 0                                      | 0                                      | 0                                                  | 0            | 0                     | 0    |
| <i>MRPL23</i> | 1                       | 0                                      | 0                                      | 0                                                  | 0            | 0                     | 0    |

| Gene             | Multi-omics integration | Gene-based result from AFGen 2017 GWAS | Gene-based result from AFGen 2018 GWAS | Meta-analysis of SNPs by two large AF GWAS in 2018 | GWAS catalog | Open Targets Platform | OMIM |
|------------------|-------------------------|----------------------------------------|----------------------------------------|----------------------------------------------------|--------------|-----------------------|------|
| <i>MRPL4</i>     | 1                       | 0                                      | 0                                      | 0                                                  | 0            | 0                     | 0    |
| <i>MRPL44</i>    | 1                       | 0                                      | 0                                      | 0                                                  | 0            | 0                     | 0    |
| <i>MRPS16</i>    | 1                       | 0                                      | 0                                      | 0                                                  | 0            | 0                     | 0    |
| <i>MRPS24</i>    | 1                       | 0                                      | 0                                      | 0                                                  | 0            | 0                     | 0    |
| <i>MRPS27</i>    | 1                       | 0                                      | 0                                      | 0                                                  | 0            | 0                     | 0    |
| <i>MRPS34</i>    | 1                       | 0                                      | 0                                      | 0                                                  | 0            | 0                     | 0    |
| <i>MRSRSS</i>    | 0                       | 0                                      | 0                                      | 0                                                  | 0            | 0                     | 1    |
| <i>MRT65</i>     | 0                       | 0                                      | 0                                      | 0                                                  | 0            | 0                     | 1    |
| <i>MRVII</i>     | 1                       | 0                                      | 0                                      | 0                                                  | 0            | 0                     | 0    |
| <i>MRXS32</i>    | 0                       | 0                                      | 0                                      | 0                                                  | 0            | 0                     | 1    |
| <i>MRXS34</i>    | 0                       | 0                                      | 0                                      | 0                                                  | 0            | 0                     | 1    |
| <i>MRXS99F</i>   | 0                       | 0                                      | 0                                      | 0                                                  | 0            | 0                     | 1    |
| <i>MS4A6A</i>    | 1                       | 0                                      | 0                                      | 0                                                  | 0            | 0                     | 0    |
| <i>MSE</i>       | 0                       | 0                                      | 0                                      | 0                                                  | 0            | 0                     | 1    |
| <i>MSH5</i>      | 1                       | 0                                      | 0                                      | 0                                                  | 0            | 0                     | 0    |
| <i>MSL2</i>      | 1                       | 0                                      | 0                                      | 0                                                  | 0            | 0                     | 0    |
| <i>MSMA</i>      | 0                       | 0                                      | 0                                      | 0                                                  | 0            | 0                     | 1    |
| <i>MSRB3</i>     | 1                       | 0                                      | 0                                      | 0                                                  | 0            | 0                     | 0    |
| <i>MSTN</i>      | 0                       | 0                                      | 0                                      | 0                                                  | 0            | 1                     | 0    |
| <i>MSTO1</i>     | 1                       | 0                                      | 0                                      | 0                                                  | 0            | 0                     | 0    |
| <i>MSX1</i>      | 1                       | 0                                      | 0                                      | 0                                                  | 0            | 0                     | 0    |
| <i>MSX2</i>      | 0                       | 0                                      | 0                                      | 0                                                  | 0            | 0                     | 1    |
| <i>MT1DP</i>     | 0                       | 0                                      | 0                                      | 0                                                  | 0            | 1                     | 0    |
| <i>MTCO3P6</i>   | 0                       | 0                                      | 0                                      | 0                                                  | 1            | 0                     | 0    |
| <i>MTCYBP4</i>   | 0                       | 0                                      | 0                                      | 0                                                  | 1            | 0                     | 0    |
| <i>MTHFD1</i>    | 1                       | 0                                      | 1                                      | 0                                                  | 0            | 0                     | 0    |
| <i>MTHFD2 P7</i> | 0                       | 0                                      | 0                                      | 0                                                  | 1            | 0                     | 0    |
| <i>MTHFR</i>     | 1                       | 0                                      | 0                                      | 0                                                  | 1            | 1                     | 0    |
| <i>MTMR11</i>    | 1                       | 0                                      | 0                                      | 0                                                  | 0            | 0                     | 0    |
| <i>MT-ND1</i>    | 0                       | 0                                      | 0                                      | 0                                                  | 0            | 1                     | 0    |
| <i>MT-ND2</i>    | 0                       | 0                                      | 0                                      | 0                                                  | 0            | 1                     | 0    |
| <i>MT-ND3</i>    | 0                       | 0                                      | 0                                      | 0                                                  | 0            | 1                     | 0    |
| <i>MT-ND4</i>    | 0                       | 0                                      | 0                                      | 0                                                  | 0            | 1                     | 0    |
| <i>MT-ND4L</i>   | 0                       | 0                                      | 0                                      | 0                                                  | 0            | 1                     | 0    |
| <i>MT-ND5</i>    | 0                       | 0                                      | 0                                      | 0                                                  | 0            | 1                     | 0    |
| <i>MT-ND6</i>    | 0                       | 0                                      | 0                                      | 0                                                  | 0            | 1                     | 0    |
| <i>MTO1</i>      | 1                       | 0                                      | 0                                      | 0                                                  | 0            | 1                     | 0    |
| <i>MTR</i>       | 0                       | 0                                      | 0                                      | 0                                                  | 0            | 1                     | 0    |
| <i>MTRR</i>      | 0                       | 0                                      | 0                                      | 0                                                  | 0            | 1                     | 0    |
| <i>MTSS1</i>     | 0                       | 0                                      | 0                                      | 1                                                  | 0            | 1                     | 0    |
| <i>MTTL1</i>     | 0                       | 0                                      | 0                                      | 0                                                  | 0            | 0                     | 1    |
| <i>MTUS1</i>     | 1                       | 0                                      | 0                                      | 0                                                  | 0            | 0                     | 0    |
| <i>MTX1</i>      | 1                       | 0                                      | 0                                      | 0                                                  | 0            | 1                     | 0    |

| Gene          | Multi-omics integration | Gene-based result from AFGen 2017 GWAS | Gene-based result from AFGen 2018 GWAS | Meta-analysis of SNPs by two large AF GWAS in 2018 | GWAS catalog | Open Targets Platform | OMIM |
|---------------|-------------------------|----------------------------------------|----------------------------------------|----------------------------------------------------|--------------|-----------------------|------|
| <i>MUC1</i>   | 1                       | 0                                      | 0                                      | 0                                                  | 0            | 1                     | 0    |
| <i>MUC16</i>  | 0                       | 0                                      | 0                                      | 0                                                  | 0            | 1                     | 0    |
| <i>MUSTN1</i> | 1                       | 0                                      | 0                                      | 0                                                  | 0            | 0                     | 0    |
| <i>MVA2</i>   | 0                       | 0                                      | 0                                      | 0                                                  | 0            | 0                     | 1    |
| <i>MVD</i>    | 0                       | 0                                      | 0                                      | 0                                                  | 0            | 1                     | 0    |
| <i>MVK</i>    | 1                       | 0                                      | 0                                      | 0                                                  | 0            | 0                     | 0    |
| <i>MVP</i>    | 0                       | 0                                      | 0                                      | 0                                                  | 0            | 1                     | 0    |
| <i>MVP1</i>   | 0                       | 0                                      | 0                                      | 0                                                  | 0            | 0                     | 1    |
| <i>MVP2</i>   | 0                       | 0                                      | 0                                      | 0                                                  | 0            | 0                     | 1    |
| <i>MX1</i>    | 0                       | 0                                      | 0                                      | 0                                                  | 1            | 1                     | 0    |
| <i>MXD1</i>   | 1                       | 1                                      | 1                                      | 0                                                  | 0            | 0                     | 0    |
| <i>MXI1</i>   | 0                       | 0                                      | 0                                      | 0                                                  | 0            | 1                     | 0    |
| <i>MYBPC3</i> | 0                       | 0                                      | 0                                      | 0                                                  | 0            | 1                     | 1    |
| <i>MYBPH</i>  | 1                       | 0                                      | 0                                      | 0                                                  | 0            | 0                     | 0    |
| <i>MYEOV</i>  | 1                       | 0                                      | 0                                      | 0                                                  | 0            | 0                     | 0    |
| <i>MYH14</i>  | 1                       | 0                                      | 0                                      | 0                                                  | 0            | 0                     | 0    |
| <i>MYH6</i>   | 1                       | 0                                      | 1                                      | 1                                                  | 1            | 0                     | 1    |
| <i>MYH7</i>   | 1                       | 0                                      | 1                                      | 0                                                  | 1            | 1                     | 1    |
| <i>MYL1</i>   | 0                       | 0                                      | 0                                      | 0                                                  | 0            | 0                     | 1    |
| <i>MYL2</i>   | 1                       | 0                                      | 0                                      | 0                                                  | 0            | 0                     | 1    |
| <i>MYL3</i>   | 1                       | 0                                      | 0                                      | 0                                                  | 0            | 1                     | 1    |
| <i>MYL4</i>   | 0                       | 0                                      | 0                                      | 0                                                  | 0            | 1                     | 1    |
| <i>MYL7</i>   | 0                       | 0                                      | 0                                      | 0                                                  | 0            | 0                     | 1    |
| <i>MYLPF</i>  | 1                       | 0                                      | 0                                      | 0                                                  | 0            | 0                     | 0    |
| <i>MYO18B</i> | 1                       | 0                                      | 0                                      | 1                                                  | 1            | 1                     | 1    |
| <i>MYO1C</i>  | 1                       | 0                                      | 0                                      | 1                                                  | 0            | 0                     | 0    |
| <i>MYO1H</i>  | 1                       | 0                                      | 0                                      | 0                                                  | 0            | 0                     | 0    |
| <i>MYO6</i>   | 1                       | 0                                      | 0                                      | 0                                                  | 0            | 0                     | 0    |
| <i>MYOCD</i>  | 1                       | 0                                      | 0                                      | 1                                                  | 1            | 1                     | 0    |
| <i>MYOG</i>   | 1                       | 0                                      | 1                                      | 0                                                  | 0            | 0                     | 0    |
| <i>MYOM3</i>  | 1                       | 0                                      | 0                                      | 0                                                  | 0            | 0                     | 0    |
| <i>MYOT</i>   | 1                       | 1                                      | 1                                      | 0                                                  | 0            | 0                     | 0    |
| <i>MYOZ1</i>  | 1                       | 0                                      | 1                                      | 0                                                  | 0            | 1                     | 0    |
| <i>MYPN</i>   | 0                       | 0                                      | 0                                      | 0                                                  | 0            | 1                     | 1    |
| <i>MYRIP</i>  | 1                       | 0                                      | 0                                      | 0                                                  | 0            | 0                     | 0    |
| <i>MYSM1</i>  | 0                       | 0                                      | 0                                      | 0                                                  | 0            | 1                     | 0    |
| <i>MYZAP</i>  | 0                       | 0                                      | 0                                      | 0                                                  | 1            | 0                     | 0    |
| <i>NAAA</i>   | 0                       | 0                                      | 0                                      | 0                                                  | 0            | 1                     | 0    |
| <i>NACA</i>   | 1                       | 0                                      | 1                                      | 1                                                  | 1            | 1                     | 0    |
| <i>NACC2</i>  | 0                       | 0                                      | 0                                      | 0                                                  | 0            | 1                     | 0    |
| <i>NAGLU</i>  | 1                       | 0                                      | 0                                      | 0                                                  | 0            | 0                     | 0    |
| <i>NAMPT</i>  | 0                       | 0                                      | 0                                      | 0                                                  | 0            | 1                     | 0    |
| <i>NANOS1</i> | 1                       | 0                                      | 0                                      | 0                                                  | 0            | 1                     | 0    |
| <i>NAPA</i>   | 1                       | 0                                      | 0                                      | 0                                                  | 0            | 0                     | 0    |

| Gene           | Multi-omics integration | Gene-based result from AFGen 2017 GWAS | Gene-based result from AFGen 2018 GWAS | Meta-analysis of SNPs by two large AF GWAS in 2018 | GWAS catalog | Open Targets Platform | OMIM |
|----------------|-------------------------|----------------------------------------|----------------------------------------|----------------------------------------------------|--------------|-----------------------|------|
| <i>NAPB</i>    | 1                       | 0                                      | 0                                      | 0                                                  | 0            | 0                     | 0    |
| <i>NAPRT</i>   | 0                       | 0                                      | 0                                      | 0                                                  | 0            | 1                     | 0    |
| <i>NAPSA</i>   | 1                       | 0                                      | 0                                      | 0                                                  | 0            | 0                     | 0    |
| <i>NARFL</i>   | 1                       | 0                                      | 0                                      | 0                                                  | 0            | 0                     | 0    |
| <i>NARS2</i>   | 1                       | 0                                      | 0                                      | 0                                                  | 0            | 0                     | 0    |
| <i>NAT14</i>   | 1                       | 0                                      | 0                                      | 0                                                  | 0            | 0                     | 0    |
| <i>NAT2</i>    | 1                       | 0                                      | 0                                      | 0                                                  | 0            | 0                     | 0    |
| <i>NAT8B</i>   | 1                       | 0                                      | 0                                      | 0                                                  | 0            | 0                     | 0    |
| <i>NAT9</i>    | 0                       | 0                                      | 0                                      | 0                                                  | 0            | 1                     | 0    |
| <i>NAV2</i>    | 1                       | 0                                      | 1                                      | 1                                                  | 1            | 1                     | 0    |
| <i>NCAPG2</i>  | 1                       | 0                                      | 0                                      | 0                                                  | 0            | 0                     | 0    |
| <i>NCEH1</i>   | 1                       | 0                                      | 0                                      | 0                                                  | 0            | 0                     | 0    |
| <i>NCF1</i>    | 0                       | 0                                      | 0                                      | 0                                                  | 0            | 1                     | 0    |
| <i>NCKAP1</i>  | 1                       | 0                                      | 0                                      | 0                                                  | 0            | 0                     | 0    |
| <i>NCKAP5</i>  | 0                       | 0                                      | 0                                      | 0                                                  | 0            | 1                     | 0    |
| <i>NCKAP5L</i> | 1                       | 0                                      | 0                                      | 0                                                  | 0            | 0                     | 0    |
| <i>NCLN</i>    | 1                       | 0                                      | 0                                      | 0                                                  | 0            | 0                     | 0    |
| <i>NCOA2</i>   | 1                       | 0                                      | 0                                      | 0                                                  | 0            | 0                     | 0    |
| <i>NCOR2</i>   | 1                       | 0                                      | 0                                      | 0                                                  | 0            | 0                     | 0    |
| <i>NCR3</i>    | 1                       | 0                                      | 0                                      | 0                                                  | 0            | 0                     | 0    |
| <i>NCSTN</i>   | 1                       | 0                                      | 0                                      | 0                                                  | 0            | 0                     | 0    |
| <i>NDEL1</i>   | 1                       | 0                                      | 0                                      | 0                                                  | 0            | 0                     | 0    |
| <i>NDH</i>     | 0                       | 0                                      | 0                                      | 0                                                  | 0            | 0                     | 1    |
| <i>NDST2</i>   | 1                       | 1                                      | 1                                      | 0                                                  | 0            | 0                     | 0    |
| <i>NDUFA1</i>  | 0                       | 0                                      | 0                                      | 0                                                  | 0            | 1                     | 0    |
| <i>NDUFA10</i> | 0                       | 0                                      | 0                                      | 0                                                  | 0            | 1                     | 0    |
| <i>NDUFA11</i> | 0                       | 0                                      | 0                                      | 0                                                  | 0            | 1                     | 0    |
| <i>NDUFA12</i> | 0                       | 0                                      | 0                                      | 0                                                  | 0            | 1                     | 0    |
| <i>NDUFA13</i> | 0                       | 0                                      | 0                                      | 0                                                  | 0            | 1                     | 0    |
| <i>NDUFA2</i>  | 0                       | 0                                      | 0                                      | 0                                                  | 0            | 1                     | 0    |
| <i>NDUFA3</i>  | 0                       | 0                                      | 0                                      | 0                                                  | 0            | 1                     | 0    |
| <i>NDUFA4</i>  | 0                       | 0                                      | 0                                      | 0                                                  | 0            | 1                     | 0    |
| <i>NDUFA4L</i> | 0                       | 0                                      | 0                                      | 0                                                  | 0            | 1                     | 0    |
| <i>2</i>       |                         |                                        |                                        |                                                    |              |                       |      |
| <i>NDUFA5</i>  | 0                       | 0                                      | 0                                      | 0                                                  | 0            | 1                     | 0    |
| <i>NDUFA6</i>  | 0                       | 0                                      | 0                                      | 0                                                  | 0            | 1                     | 0    |
| <i>NDUFA7</i>  | 0                       | 0                                      | 0                                      | 0                                                  | 0            | 1                     | 0    |
| <i>NDUFA8</i>  | 0                       | 0                                      | 0                                      | 0                                                  | 0            | 1                     | 0    |
| <i>NDUFA9</i>  | 0                       | 0                                      | 0                                      | 0                                                  | 0            | 1                     | 0    |
| <i>NDUFAB</i>  | 0                       | 0                                      | 0                                      | 0                                                  | 0            | 1                     | 0    |
| <i>1</i>       |                         |                                        |                                        |                                                    |              |                       |      |
| <i>NDUFAF</i>  | 0                       | 0                                      | 0                                      | 0                                                  | 0            | 1                     | 0    |
| <i>1</i>       |                         |                                        |                                        |                                                    |              |                       |      |
| <i>NDUFAF</i>  | 0                       | 0                                      | 0                                      | 0                                                  | 0            | 1                     | 0    |
| <i>2</i>       |                         |                                        |                                        |                                                    |              |                       |      |

| Gene           | Multi-omics integration | Gene-based result from AFGen 2017 GWAS | Gene-based result from AFGen 2018 GWAS | Meta-analysis of SNPs by two large AF GWAS in 2018 | GWAS catalog | Open Targets Platform | OMIM |
|----------------|-------------------------|----------------------------------------|----------------------------------------|----------------------------------------------------|--------------|-----------------------|------|
| <i>NDUFAF3</i> | 0                       | 0                                      | 0                                      | 0                                                  | 0            | 1                     | 0    |
| <i>NDUFAF4</i> | 0                       | 0                                      | 0                                      | 0                                                  | 0            | 1                     | 0    |
| <i>NDUFB1</i>  | 0                       | 0                                      | 0                                      | 0                                                  | 0            | 1                     | 0    |
| <i>NDUFB10</i> | 1                       | 0                                      | 1                                      | 0                                                  | 1            | 1                     | 0    |
| <i>NDUFB11</i> | 0                       | 0                                      | 0                                      | 0                                                  | 0            | 1                     | 1    |
| <i>NDUFB2</i>  | 0                       | 0                                      | 0                                      | 0                                                  | 0            | 1                     | 0    |
| <i>NDUFB3</i>  | 0                       | 0                                      | 0                                      | 0                                                  | 0            | 1                     | 0    |
| <i>NDUFB4</i>  | 0                       | 0                                      | 0                                      | 0                                                  | 0            | 1                     | 0    |
| <i>NDUFB5</i>  | 0                       | 0                                      | 0                                      | 0                                                  | 0            | 1                     | 0    |
| <i>NDUFB6</i>  | 0                       | 0                                      | 0                                      | 0                                                  | 0            | 1                     | 0    |
| <i>NDUFB7</i>  | 0                       | 0                                      | 0                                      | 0                                                  | 0            | 1                     | 0    |
| <i>NDUFB8</i>  | 0                       | 0                                      | 0                                      | 0                                                  | 0            | 1                     | 0    |
| <i>NDUFB9</i>  | 0                       | 0                                      | 0                                      | 0                                                  | 0            | 1                     | 0    |
| <i>NDUFC1</i>  | 0                       | 0                                      | 0                                      | 0                                                  | 0            | 1                     | 0    |
| <i>NDUFC2</i>  | 0                       | 0                                      | 0                                      | 0                                                  | 0            | 1                     | 0    |
| <i>NDUFS1</i>  | 0                       | 0                                      | 0                                      | 0                                                  | 0            | 1                     | 0    |
| <i>NDUFS2</i>  | 0                       | 0                                      | 0                                      | 0                                                  | 0            | 1                     | 0    |
| <i>NDUFS3</i>  | 0                       | 0                                      | 0                                      | 0                                                  | 0            | 1                     | 0    |
| <i>NDUFS4</i>  | 0                       | 0                                      | 0                                      | 0                                                  | 0            | 1                     | 0    |
| <i>NDUFS5</i>  | 0                       | 0                                      | 0                                      | 0                                                  | 0            | 1                     | 0    |
| <i>NDUFS6</i>  | 0                       | 0                                      | 0                                      | 0                                                  | 0            | 1                     | 0    |
| <i>NDUFS7</i>  | 0                       | 0                                      | 0                                      | 0                                                  | 0            | 1                     | 0    |
| <i>NDUFS8</i>  | 0                       | 0                                      | 0                                      | 0                                                  | 0            | 1                     | 0    |
| <i>NDUFV1</i>  | 0                       | 0                                      | 0                                      | 0                                                  | 0            | 1                     | 0    |
| <i>NDUFV2</i>  | 0                       | 0                                      | 0                                      | 0                                                  | 0            | 1                     | 0    |
| <i>NDUFV3</i>  | 0                       | 0                                      | 0                                      | 0                                                  | 0            | 1                     | 0    |
| <i>NEAT1</i>   | 0                       | 0                                      | 0                                      | 0                                                  | 0            | 1                     | 0    |
| <i>NEB</i>     | 0                       | 0                                      | 0                                      | 0                                                  | 0            | 1                     | 0    |
| <i>NEBL</i>    | 1                       | 0                                      | 0                                      | 0                                                  | 1            | 1                     | 0    |
| <i>NEDD4L</i>  | 1                       | 0                                      | 0                                      | 0                                                  | 0            | 0                     | 0    |
| <i>NEGR1</i>   | 0                       | 0                                      | 0                                      | 0                                                  | 0            | 1                     | 0    |
| <i>NEIL1</i>   | 1                       | 0                                      | 0                                      | 0                                                  | 0            | 0                     | 0    |
| <i>NEIL2</i>   | 1                       | 0                                      | 0                                      | 0                                                  | 0            | 0                     | 0    |
| <i>NEIMY</i>   | 0                       | 0                                      | 0                                      | 0                                                  | 0            | 0                     | 1    |
| <i>NEK10</i>   | 1                       | 0                                      | 0                                      | 0                                                  | 0            | 0                     | 0    |
| <i>NEK8</i>    | 0                       | 0                                      | 0                                      | 0                                                  | 0            | 0                     | 1    |
| <i>NEO1</i>    | 1                       | 0                                      | 1                                      | 0                                                  | 0            | 0                     | 0    |
| <i>NEU1</i>    | 1                       | 0                                      | 0                                      | 0                                                  | 0            | 0                     | 0    |
| <i>NEURL1</i>  | 0                       | 0                                      | 0                                      | 1                                                  | 1            | 1                     | 0    |
| <i>NEURL4</i>  | 1                       | 0                                      | 0                                      | 0                                                  | 0            | 0                     | 0    |
| <i>NEUROD2</i> | 1                       | 0                                      | 0                                      | 0                                                  | 0            | 0                     | 0    |

| Gene           | Multi-omics integration | Gene-based result from AFGen 2017 GWAS | Gene-based result from AFGen 2018 GWAS | Meta-analysis of SNPs by two large AF GWAS in 2018 | GWAS catalog | Open Targets Platform | OMIM |
|----------------|-------------------------|----------------------------------------|----------------------------------------|----------------------------------------------------|--------------|-----------------------|------|
| <i>NF1</i>     | 0                       | 0                                      | 0                                      | 0                                                  | 0            | 1                     | 1    |
| <i>NF1</i>     | 0                       | 0                                      | 0                                      | 0                                                  | 0            | 1                     | 1    |
| <i>NF2</i>     | 0                       | 0                                      | 0                                      | 0                                                  | 0            | 1                     | 0    |
| <i>NFAT5</i>   | 0                       | 0                                      | 0                                      | 0                                                  | 0            | 1                     | 0    |
| <i>NFATC1</i>  | 0                       | 0                                      | 0                                      | 0                                                  | 0            | 1                     | 0    |
| <i>NFATC2I</i> | 1                       | 0                                      | 0                                      | 0                                                  | 0            | 0                     | 0    |
| <i>P</i>       |                         |                                        |                                        |                                                    |              |                       |      |
| <i>NFATC3</i>  | 0                       | 0                                      | 0                                      | 0                                                  | 0            | 1                     | 0    |
| <i>NFATC4</i>  | 1                       | 0                                      | 0                                      | 0                                                  | 0            | 1                     | 0    |
| <i>NFE2</i>    | 1                       | 0                                      | 0                                      | 0                                                  | 0            | 1                     | 0    |
| <i>NFE2L2</i>  | 1                       | 0                                      | 0                                      | 0                                                  | 0            | 0                     | 0    |
| <i>NFIA</i>    | 1                       | 0                                      | 0                                      | 0                                                  | 0            | 0                     | 0    |
| <i>NFIX</i>    | 1                       | 0                                      | 0                                      | 0                                                  | 0            | 0                     | 0    |
| <i>NFKB1</i>   | 1                       | 0                                      | 0                                      | 0                                                  | 0            | 1                     | 0    |
| <i>NFKB2</i>   | 1                       | 0                                      | 1                                      | 0                                                  | 0            | 0                     | 0    |
| <i>NFKBIL1</i> | 1                       | 0                                      | 0                                      | 0                                                  | 0            | 0                     | 0    |
| <i>NFKBIZ</i>  | 0                       | 0                                      | 0                                      | 0                                                  | 0            | 1                     | 0    |
| <i>NFNS</i>    | 0                       | 0                                      | 0                                      | 0                                                  | 0            | 0                     | 1    |
| <i>NFYB</i>    | 1                       | 0                                      | 0                                      | 0                                                  | 0            | 0                     | 0    |
| <i>NFYC</i>    | 1                       | 0                                      | 0                                      | 0                                                  | 0            | 0                     | 0    |
| <i>NGF</i>     | 0                       | 0                                      | 0                                      | 0                                                  | 0            | 1                     | 0    |
| <i>NGPS</i>    | 0                       | 0                                      | 0                                      | 0                                                  | 0            | 0                     | 1    |
| <i>NHLH1</i>   | 1                       | 0                                      | 0                                      | 0                                                  | 0            | 0                     | 0    |
| <i>NHLH2</i>   | 1                       | 0                                      | 0                                      | 0                                                  | 0            | 0                     | 0    |
| <i>NIN</i>     | 1                       | 0                                      | 0                                      | 0                                                  | 0            | 0                     | 0    |
| <i>NIP7</i>    | 1                       | 0                                      | 0                                      | 0                                                  | 0            | 0                     | 0    |
| <i>NISCH</i>   | 0                       | 0                                      | 0                                      | 0                                                  | 0            | 1                     | 0    |
| <i>NKD2</i>    | 1                       | 0                                      | 0                                      | 0                                                  | 0            | 0                     | 0    |
| <i>NKIRAS1</i> | 1                       | 0                                      | 0                                      | 0                                                  | 0            | 0                     | 0    |
| <i>NKX2-1</i>  | 0                       | 0                                      | 0                                      | 0                                                  | 0            | 1                     | 0    |
| <i>NKX2-2</i>  | 1                       | 0                                      | 0                                      | 0                                                  | 0            | 0                     | 0    |
| <i>NKX2-3</i>  | 1                       | 0                                      | 0                                      | 0                                                  | 0            | 0                     | 0    |
| <i>NKX2-5</i>  | 1                       | 0                                      | 1                                      | 1                                                  | 1            | 1                     | 1    |
| <i>NKX6-2</i>  | 1                       | 0                                      | 0                                      | 0                                                  | 0            | 0                     | 0    |
| <i>NLGN2</i>   | 1                       | 0                                      | 1                                      | 0                                                  | 0            | 0                     | 0    |
| <i>NLRP3</i>   | 0                       | 0                                      | 0                                      | 0                                                  | 0            | 1                     | 0    |
| <i>NLS1</i>    | 0                       | 0                                      | 0                                      | 0                                                  | 0            | 0                     | 1    |
| <i>NMB</i>     | 1                       | 0                                      | 0                                      | 0                                                  | 0            | 0                     | 0    |
| <i>NME1</i>    | 1                       | 0                                      | 0                                      | 0                                                  | 0            | 0                     | 0    |
| <i>NME3</i>    | 1                       | 0                                      | 0                                      | 0                                                  | 0            | 0                     | 0    |
| <i>NME4</i>    | 1                       | 0                                      | 0                                      | 0                                                  | 0            | 0                     | 0    |
| <i>NME5</i>    | 1                       | 0                                      | 1                                      | 0                                                  | 1            | 0                     | 0    |
| <i>NME7</i>    | 0                       | 0                                      | 0                                      | 0                                                  | 0            | 1                     | 0    |
| <i>NMI</i>     | 1                       | 0                                      | 0                                      | 0                                                  | 0            | 0                     | 0    |

| Gene           | Multi-omics integration | Gene-based result from AFGen 2017 GWAS | Gene-based result from AFGen 2018 GWAS | Meta-analysis of SNPs by two large AF GWAS in 2018 | GWAS catalog | Open Targets Platform | OMIM |
|----------------|-------------------------|----------------------------------------|----------------------------------------|----------------------------------------------------|--------------|-----------------------|------|
| <i>NNT</i>     | 0                       | 0                                      | 0                                      | 0                                                  | 0            | 1                     | 0    |
| <i>NOG</i>     | 0                       | 0                                      | 0                                      | 0                                                  | 0            | 1                     | 0    |
| <i>NOS1</i>    | 0                       | 0                                      | 0                                      | 0                                                  | 0            | 1                     | 0    |
| <i>NOS2</i>    | 0                       | 0                                      | 0                                      | 0                                                  | 0            | 1                     | 0    |
| <i>NOS3</i>    | 1                       | 0                                      | 1                                      | 0                                                  | 0            | 1                     | 0    |
| <i>NOSTRIN</i> | 1                       | 0                                      | 0                                      | 0                                                  | 0            | 0                     | 0    |
| <i>NOTCH4</i>  | 0                       | 0                                      | 0                                      | 0                                                  | 0            | 1                     | 0    |
| <i>NOX4</i>    | 0                       | 0                                      | 0                                      | 0                                                  | 0            | 1                     | 0    |
| <i>NOXO1</i>   | 1                       | 0                                      | 0                                      | 0                                                  | 0            | 0                     | 0    |
| <i>NPAS1</i>   | 1                       | 0                                      | 0                                      | 0                                                  | 0            | 0                     | 0    |
| <i>NPC1</i>    | 1                       | 0                                      | 0                                      | 0                                                  | 0            | 0                     | 0    |
| <i>NPEPL1</i>  | 1                       | 0                                      | 0                                      | 0                                                  | 0            | 0                     | 0    |
| <i>NPHP3</i>   | 0                       | 0                                      | 0                                      | 0                                                  | 0            | 0                     | 1    |
| <i>NPM2</i>    | 1                       | 0                                      | 1                                      | 0                                                  | 0            | 0                     | 0    |
| <i>NPM3</i>    | 0                       | 0                                      | 1                                      | 0                                                  | 0            | 0                     | 0    |
| <i>NPPA</i>    | 1                       | 0                                      | 0                                      | 0                                                  | 0            | 1                     | 1    |
| <i>NPPB</i>    | 1                       | 0                                      | 0                                      | 0                                                  | 0            | 1                     | 1    |
| <i>NPPC</i>    | 0                       | 0                                      | 0                                      | 0                                                  | 0            | 0                     | 1    |
| <i>NPR1</i>    | 1                       | 0                                      | 0                                      | 0                                                  | 0            | 0                     | 1    |
| <i>NPR2</i>    | 0                       | 0                                      | 0                                      | 0                                                  | 0            | 0                     | 1    |
| <i>NPR3</i>    | 1                       | 0                                      | 0                                      | 0                                                  | 0            | 1                     | 1    |
| <i>NPS</i>     | 0                       | 0                                      | 0                                      | 0                                                  | 0            | 1                     | 0    |
| <i>NPTN</i>    | 1                       | 0                                      | 0                                      | 0                                                  | 0            | 0                     | 0    |
| <i>NPTXR</i>   | 1                       | 0                                      | 0                                      | 0                                                  | 0            | 0                     | 0    |
| <i>NPY4R</i>   | 0                       | 0                                      | 0                                      | 0                                                  | 0            | 1                     | 0    |
| <i>NQO1</i>    | 0                       | 0                                      | 0                                      | 0                                                  | 0            | 1                     | 0    |
| <i>NR1D2</i>   | 0                       | 0                                      | 0                                      | 0                                                  | 0            | 1                     | 0    |
| <i>NR2F2</i>   | 0                       | 0                                      | 0                                      | 0                                                  | 0            | 0                     | 1    |
| <i>NR3C1</i>   | 1                       | 0                                      | 1                                      | 1                                                  | 1            | 1                     | 1    |
| <i>NR3C2</i>   | 1                       | 0                                      | 1                                      | 0                                                  | 0            | 1                     | 0    |
| <i>NRAP</i>    | 1                       | 0                                      | 0                                      | 0                                                  | 0            | 0                     | 0    |
| <i>NRBF2</i>   | 1                       | 0                                      | 1                                      | 0                                                  | 0            | 0                     | 0    |
| <i>NRBP1</i>   | 0                       | 0                                      | 0                                      | 0                                                  | 1            | 0                     | 0    |
| <i>NREP</i>    | 0                       | 0                                      | 0                                      | 0                                                  | 0            | 1                     | 0    |
| <i>NRG1</i>    | 1                       | 0                                      | 0                                      | 0                                                  | 0            | 1                     | 0    |
| <i>NRG2</i>    | 1                       | 0                                      | 0                                      | 0                                                  | 0            | 0                     | 0    |
| <i>NRIP1</i>   | 1                       | 0                                      | 0                                      | 0                                                  | 0            | 0                     | 0    |
| <i>NRTN</i>    | 0                       | 0                                      | 0                                      | 0                                                  | 0            | 1                     | 0    |
| <i>NRXN2</i>   | 1                       | 0                                      | 0                                      | 0                                                  | 0            | 0                     | 0    |
| <i>NRXN3</i>   | 0                       | 0                                      | 0                                      | 0                                                  | 0            | 1                     | 0    |
| <i>NS1</i>     | 0                       | 0                                      | 0                                      | 0                                                  | 0            | 0                     | 1    |
| <i>NS3</i>     | 0                       | 0                                      | 0                                      | 0                                                  | 0            | 0                     | 1    |
| <i>NS4</i>     | 0                       | 0                                      | 0                                      | 0                                                  | 0            | 0                     | 1    |
| <i>NS7</i>     | 0                       | 0                                      | 0                                      | 0                                                  | 0            | 0                     | 1    |

| Gene           | Multi-omics integration | Gene-based result from AFGen 2017 GWAS | Gene-based result from AFGen 2018 GWAS | Meta-analysis of SNPs by two large AF GWAS in 2018 | GWAS catalog | Open Targets Platform | OMIM |
|----------------|-------------------------|----------------------------------------|----------------------------------------|----------------------------------------------------|--------------|-----------------------|------|
| <i>NS8</i>     | 0                       | 0                                      | 0                                      | 0                                                  | 0            | 0                     | 1    |
| <i>NSD1</i>    | 0                       | 0                                      | 0                                      | 0                                                  | 0            | 0                     | 1    |
| <i>NSLH1</i>   | 0                       | 0                                      | 0                                      | 0                                                  | 0            | 0                     | 1    |
| <i>NSLH2</i>   | 0                       | 0                                      | 0                                      | 0                                                  | 0            | 0                     | 1    |
| <i>NSLL</i>    | 0                       | 0                                      | 0                                      | 0                                                  | 0            | 0                     | 1    |
| <i>NSUN6</i>   | 1                       | 0                                      | 0                                      | 0                                                  | 0            | 0                     | 0    |
| <i>NT5C1A</i>  | 1                       | 0                                      | 0                                      | 0                                                  | 0            | 0                     | 0    |
| <i>NT5C2</i>   | 1                       | 0                                      | 0                                      | 0                                                  | 0            | 0                     | 0    |
| <i>NT5C3A</i>  | 0                       | 0                                      | 0                                      | 0                                                  | 0            | 1                     | 0    |
| <i>NTF3</i>    | 0                       | 0                                      | 0                                      | 0                                                  | 0            | 0                     | 1    |
| <i>NTHL1</i>   | 1                       | 0                                      | 0                                      | 0                                                  | 0            | 0                     | 0    |
| <i>NTM</i>     | 0                       | 0                                      | 0                                      | 0                                                  | 0            | 1                     | 0    |
| <i>NTN3</i>    | 1                       | 0                                      | 0                                      | 0                                                  | 0            | 0                     | 0    |
| <i>NTRK2</i>   | 1                       | 0                                      | 0                                      | 0                                                  | 0            | 1                     | 0    |
| <i>NUBP2</i>   | 1                       | 0                                      | 0                                      | 0                                                  | 0            | 0                     | 0    |
| <i>NUCKS1</i>  | 1                       | 0                                      | 1                                      | 1                                                  | 1            | 1                     | 0    |
| <i>NUDT13</i>  | 1                       | 0                                      | 0                                      | 0                                                  | 0            | 0                     | 0    |
| <i>NUDT3</i>   | 1                       | 0                                      | 0                                      | 0                                                  | 1            | 0                     | 0    |
| <i>NUP155</i>  | 0                       | 0                                      | 0                                      | 0                                                  | 0            | 1                     | 1    |
| <i>NXD</i>     | 0                       | 0                                      | 0                                      | 0                                                  | 0            | 0                     | 1    |
| <i>NXPH3</i>   | 1                       | 0                                      | 0                                      | 0                                                  | 0            | 0                     | 0    |
| <i>OAZ3</i>    | 1                       | 0                                      | 0                                      | 0                                                  | 0            | 0                     | 0    |
| <i>OBSCN</i>   | 1                       | 0                                      | 0                                      | 0                                                  | 0            | 0                     | 0    |
| <i>ODDD</i>    | 0                       | 0                                      | 0                                      | 0                                                  | 0            | 0                     | 1    |
| <i>ODF3L1</i>  | 1                       | 0                                      | 0                                      | 0                                                  | 0            | 0                     | 0    |
| <i>OFD11</i>   | 0                       | 0                                      | 0                                      | 0                                                  | 0            | 0                     | 1    |
| <i>OGDNS</i>   | 0                       | 0                                      | 0                                      | 0                                                  | 0            | 0                     | 1    |
| <i>OLA1</i>    | 1                       | 0                                      | 0                                      | 0                                                  | 0            | 0                     | 0    |
| <i>OLFML2B</i> | 1                       | 0                                      | 0                                      | 0                                                  | 0            | 0                     | 0    |
| <i>OMOD1</i>   | 0                       | 0                                      | 0                                      | 0                                                  | 0            | 0                     | 1    |
| <i>OPA3</i>    | 1                       | 0                                      | 0                                      | 0                                                  | 0            | 0                     | 0    |
| <i>OPN1SW</i>  | 1                       | 0                                      | 0                                      | 1                                                  | 1            | 1                     | 0    |
| <i>OPN4</i>    | 1                       | 0                                      | 0                                      | 0                                                  | 0            | 0                     | 0    |
| <i>OR10AE3</i> | 0                       | 0                                      | 0                                      | 1                                                  | 0            | 0                     | 0    |
| <i>P</i>       |                         |                                        |                                        |                                                    |              |                       |      |
| <i>ORIG1</i>   | 1                       | 0                                      | 0                                      | 0                                                  | 0            | 0                     | 0    |
| <i>OR7C2</i>   | 1                       | 0                                      | 0                                      | 0                                                  | 0            | 0                     | 0    |
| <i>OR8B4</i>   | 1                       | 0                                      | 0                                      | 0                                                  | 0            | 0                     | 0    |
| <i>ORMDL3</i>  | 1                       | 0                                      | 0                                      | 0                                                  | 0            | 0                     | 0    |
| <i>OSBP2</i>   | 1                       | 0                                      | 0                                      | 0                                                  | 0            | 0                     | 0    |
| <i>OSBPL10</i> | 1                       | 0                                      | 0                                      | 0                                                  | 0            | 0                     | 0    |
| <i>OSBPL1A</i> | 0                       | 0                                      | 0                                      | 0                                                  | 0            | 1                     | 0    |
| <i>OSBPL6</i>  | 1                       | 0                                      | 0                                      | 0                                                  | 0            | 0                     | 0    |
| <i>OSCAR</i>   | 0                       | 0                                      | 0                                      | 0                                                  | 0            | 1                     | 0    |



| Gene            | Multi-omics integration | Gene-based result from AFGen 2017 GWAS | Gene-based result from AFGen 2018 GWAS | Meta-analysis of SNPs by two large AF GWAS in 2018 | GWAS catalog | Open Targets Platform | OMIM |
|-----------------|-------------------------|----------------------------------------|----------------------------------------|----------------------------------------------------|--------------|-----------------------|------|
| <i>OSCS</i>     | 0                       | 0                                      | 0                                      | 0                                                  | 0            | 0                     | 1    |
| <i>OSM</i>      | 1                       | 0                                      | 0                                      | 0                                                  | 0            | 1                     | 0    |
| <i>OSTF1P1</i>  | 0                       | 0                                      | 0                                      | 0                                                  | 1            | 0                     | 0    |
| <i>OTC</i>      | 0                       | 0                                      | 0                                      | 0                                                  | 0            | 1                     | 0    |
| <i>OTUD6B</i>   | 1                       | 0                                      | 0                                      | 0                                                  | 0            | 0                     | 0    |
| <i>OTUD7B</i>   | 1                       | 0                                      | 0                                      | 0                                                  | 0            | 0                     | 0    |
| <i>P2RY12</i>   | 1                       | 0                                      | 0                                      | 0                                                  | 0            | 1                     | 0    |
| <i>P4HA1</i>    | 1                       | 0                                      | 0                                      | 0                                                  | 0            | 0                     | 0    |
| <i>P4HB</i>     | 0                       | 0                                      | 0                                      | 0                                                  | 0            | 1                     | 0    |
| <i>PABPC4</i>   | 1                       | 0                                      | 0                                      | 0                                                  | 0            | 0                     | 0    |
| <i>PACA</i>     | 0                       | 0                                      | 0                                      | 0                                                  | 0            | 0                     | 1    |
| <i>PACSIN1</i>  | 1                       | 0                                      | 0                                      | 0                                                  | 0            | 0                     | 0    |
| <i>PADI2</i>    | 1                       | 0                                      | 0                                      | 0                                                  | 0            | 0                     | 0    |
| <i>PAFAH1B2</i> | 1                       | 0                                      | 0                                      | 0                                                  | 0            | 0                     | 0    |
| <i>PAK2</i>     | 1                       | 0                                      | 1                                      | 0                                                  | 1            | 1                     | 0    |
| <i>PAK4</i>     | 1                       | 0                                      | 0                                      | 0                                                  | 0            | 0                     | 0    |
| <i>PAM</i>      | 0                       | 0                                      | 0                                      | 0                                                  | 0            | 1                     | 0    |
| <i>PANCR</i>    | 0                       | 0                                      | 0                                      | 1                                                  | 0            | 0                     | 1    |
| <i>PANX1</i>    | 0                       | 0                                      | 0                                      | 0                                                  | 0            | 1                     | 0    |
| <i>PAPA8</i>    | 0                       | 0                                      | 0                                      | 0                                                  | 0            | 0                     | 1    |
| <i>PAPLN</i>    | 1                       | 0                                      | 0                                      | 0                                                  | 0            | 0                     | 0    |
| <i>PAPOLG</i>   | 1                       | 0                                      | 0                                      | 0                                                  | 0            | 0                     | 0    |
| <i>PAQR3</i>    | 1                       | 0                                      | 0                                      | 0                                                  | 0            | 0                     | 0    |
| <i>PAQR5</i>    | 1                       | 0                                      | 0                                      | 0                                                  | 0            | 0                     | 0    |
| <i>PAQR6</i>    | 1                       | 0                                      | 0                                      | 0                                                  | 0            | 0                     | 0    |
| <i>PAQR7</i>    | 1                       | 0                                      | 0                                      | 0                                                  | 0            | 0                     | 0    |
| <i>PAQR8</i>    | 1                       | 0                                      | 0                                      | 0                                                  | 0            | 0                     | 0    |
| <i>PAQR9</i>    | 1                       | 0                                      | 0                                      | 0                                                  | 0            | 0                     | 0    |
| <i>PARM1</i>    | 1                       | 0                                      | 0                                      | 0                                                  | 0            | 0                     | 0    |
| <i>PARP16</i>   | 1                       | 0                                      | 0                                      | 0                                                  | 0            | 0                     | 0    |
| <i>PAX6</i>     | 0                       | 0                                      | 0                                      | 0                                                  | 0            | 1                     | 0    |
| <i>PAXIP1</i>   | 1                       | 0                                      | 0                                      | 0                                                  | 0            | 0                     | 0    |
| <i>PBD10A</i>   | 0                       | 0                                      | 0                                      | 0                                                  | 0            | 0                     | 1    |
| <i>PBD12A</i>   | 0                       | 0                                      | 0                                      | 0                                                  | 0            | 0                     | 1    |
| <i>PBX2</i>     | 1                       | 0                                      | 0                                      | 0                                                  | 0            | 0                     | 0    |
| <i>PBXIP1</i>   | 1                       | 1                                      | 1                                      | 0                                                  | 0            | 0                     | 0    |
| <i>PC</i>       | 1                       | 0                                      | 0                                      | 0                                                  | 0            | 0                     | 0    |
| <i>PCAT29</i>   | 0                       | 0                                      | 0                                      | 0                                                  | 1            | 0                     | 0    |
| <i>PCBP1</i>    | 1                       | 0                                      | 0                                      | 0                                                  | 0            | 0                     | 0    |
| <i>PCCB</i>     | 1                       | 0                                      | 0                                      | 0                                                  | 0            | 0                     | 0    |
| <i>PCDH18</i>   | 0                       | 0                                      | 0                                      | 0                                                  | 0            | 1                     | 0    |
| <i>PCDH8</i>    | 1                       | 0                                      | 0                                      | 0                                                  | 0            | 0                     | 0    |
| <i>PCGF6</i>    | 1                       | 0                                      | 0                                      | 0                                                  | 0            | 0                     | 0    |

| Gene          | Multi-omics integration | Gene-based result from AFGen 2017 GWAS | Gene-based result from AFGen 2018 GWAS | Meta-analysis of SNPs by two large AF GWAS in 2018 | GWAS catalog | Open Targets Platform | OMIM |
|---------------|-------------------------|----------------------------------------|----------------------------------------|----------------------------------------------------|--------------|-----------------------|------|
| <i>PCID2</i>  | 1                       | 0                                      | 0                                      | 0                                                  | 0            | 0                     | 0    |
| <i>PCMI</i>   | 1                       | 0                                      | 1                                      | 0                                                  | 0            | 0                     | 0    |
| <i>PCMT1</i>  | 1                       | 0                                      | 0                                      | 0                                                  | 0            | 0                     | 0    |
| <i>PCNA</i>   | 0                       | 0                                      | 0                                      | 0                                                  | 0            | 1                     | 0    |
| <i>PCNX1</i>  | 0                       | 0                                      | 0                                      | 0                                                  | 0            | 1                     | 0    |
| <i>PCSK7</i>  | 1                       | 0                                      | 0                                      | 0                                                  | 0            | 0                     | 0    |
| <i>PCSK9</i>  | 0                       | 0                                      | 0                                      | 0                                                  | 0            | 1                     | 0    |
| <i>PCYOX1</i> | 1                       | 0                                      | 0                                      | 0                                                  | 0            | 0                     | 0    |
| <i>PCYT1A</i> | 0                       | 0                                      | 0                                      | 0                                                  | 0            | 1                     | 0    |
| <i>PDC</i>    | 0                       | 0                                      | 0                                      | 0                                                  | 0            | 1                     | 0    |
| <i>PDCD11</i> | 1                       | 0                                      | 0                                      | 0                                                  | 0            | 0                     | 0    |
| <i>PDE3B</i>  | 1                       | 0                                      | 0                                      | 0                                                  | 0            | 0                     | 0    |
| <i>PDE4B</i>  | 1                       | 0                                      | 0                                      | 0                                                  | 0            | 0                     | 0    |
| <i>PDE4D</i>  | 0                       | 0                                      | 0                                      | 0                                                  | 0            | 1                     | 0    |
| <i>PDE8B</i>  | 1                       | 0                                      | 0                                      | 0                                                  | 0            | 0                     | 0    |
| <i>PDGFRA</i> | 0                       | 0                                      | 0                                      | 0                                                  | 0            | 1                     | 0    |
| <i>PDGFRB</i> | 0                       | 0                                      | 0                                      | 0                                                  | 0            | 1                     | 0    |
| <i>PDHB</i>   | 1                       | 0                                      | 0                                      | 0                                                  | 0            | 0                     | 0    |
| <i>PDLIM2</i> | 1                       | 0                                      | 0                                      | 0                                                  | 0            | 0                     | 0    |
| <i>PDLIM5</i> | 1                       | 0                                      | 0                                      | 0                                                  | 0            | 0                     | 0    |
| <i>PDPK1</i>  | 0                       | 0                                      | 0                                      | 0                                                  | 0            | 0                     | 1    |
| <i>PDPN</i>   | 0                       | 0                                      | 0                                      | 0                                                  | 0            | 0                     | 1    |
| <i>PDRG1</i>  | 1                       | 0                                      | 0                                      | 0                                                  | 0            | 0                     | 0    |
| <i>PDS5B</i>  | 1                       | 0                                      | 0                                      | 0                                                  | 0            | 0                     | 0    |
| <i>PEA15</i>  | 0                       | 0                                      | 0                                      | 0                                                  | 0            | 1                     | 0    |
| <i>PEAMO</i>  | 0                       | 0                                      | 0                                      | 0                                                  | 0            | 0                     | 1    |
| <i>PEE5</i>   | 0                       | 0                                      | 0                                      | 0                                                  | 0            | 0                     | 1    |
| <i>PELP1</i>  | 1                       | 0                                      | 0                                      | 0                                                  | 0            | 0                     | 0    |
| <i>PENK</i>   | 1                       | 0                                      | 0                                      | 0                                                  | 0            | 0                     | 0    |
| <i>PEOA3</i>  | 0                       | 0                                      | 0                                      | 0                                                  | 0            | 0                     | 1    |
| <i>PEOB1</i>  | 0                       | 0                                      | 0                                      | 0                                                  | 0            | 0                     | 1    |
| <i>PEPD</i>   | 0                       | 0                                      | 0                                      | 0                                                  | 0            | 1                     | 0    |
| <i>PER2</i>   | 1                       | 0                                      | 0                                      | 0                                                  | 0            | 0                     | 0    |
| <i>PEX13</i>  | 1                       | 0                                      | 0                                      | 0                                                  | 0            | 0                     | 0    |
| <i>PEX14</i>  | 1                       | 0                                      | 0                                      | 0                                                  | 0            | 0                     | 0    |
| <i>PEX19</i>  | 1                       | 0                                      | 0                                      | 0                                                  | 0            | 0                     | 0    |
| <i>PEX26</i>  | 1                       | 0                                      | 0                                      | 0                                                  | 0            | 0                     | 0    |
| <i>PEX3</i>   | 1                       | 0                                      | 0                                      | 0                                                  | 0            | 0                     | 0    |
| <i>PEX5L</i>  | 1                       | 0                                      | 0                                      | 0                                                  | 0            | 0                     | 0    |
| <i>PEX6</i>   | 0                       | 0                                      | 0                                      | 0                                                  | 0            | 1                     | 0    |
| <i>PF4</i>    | 0                       | 0                                      | 0                                      | 0                                                  | 0            | 1                     | 0    |
| <i>PFDN1</i>  | 1                       | 0                                      | 0                                      | 0                                                  | 0            | 0                     | 0    |
| <i>PFHB1A</i> | 0                       | 0                                      | 0                                      | 0                                                  | 0            | 0                     | 1    |
| <i>PFHB2</i>  | 0                       | 0                                      | 0                                      | 0                                                  | 0            | 0                     | 1    |

| Gene           | Multi-omics integration | Gene-based result from AFGen 2017 GWAS | Gene-based result from AFGen 2018 GWAS | Meta-analysis of SNPs by two large AF GWAS in 2018 | GWAS catalog | Open Targets Platform | OMIM |
|----------------|-------------------------|----------------------------------------|----------------------------------------|----------------------------------------------------|--------------|-----------------------|------|
| <i>PFKFB2</i>  | 1                       | 0                                      | 0                                      | 0                                                  | 0            | 0                     | 0    |
| <i>PGAP2</i>   | 1                       | 0                                      | 0                                      | 0                                                  | 0            | 0                     | 0    |
| <i>PGAP3</i>   | 1                       | 0                                      | 0                                      | 0                                                  | 0            | 0                     | 0    |
| <i>PGD</i>     | 1                       | 0                                      | 0                                      | 0                                                  | 0            | 0                     | 0    |
| <i>PGK1</i>    | 0                       | 0                                      | 0                                      | 0                                                  | 0            | 1                     | 0    |
| <i>PGP</i>     | 0                       | 0                                      | 0                                      | 1                                                  | 1            | 1                     | 0    |
| <i>PGS1</i>    | 1                       | 0                                      | 0                                      | 0                                                  | 0            | 0                     | 0    |
| <i>PHA2A</i>   | 0                       | 0                                      | 0                                      | 0                                                  | 0            | 0                     | 1    |
| <i>PHACTR2</i> | 1                       | 0                                      | 0                                      | 0                                                  | 0            | 1                     | 0    |
| <i>PHC2</i>    | 1                       | 0                                      | 0                                      | 0                                                  | 0            | 0                     | 0    |
| <i>PHF1</i>    | 1                       | 0                                      | 0                                      | 0                                                  | 0            | 0                     | 0    |
| <i>PHF13</i>   | 1                       | 0                                      | 0                                      | 0                                                  | 0            | 0                     | 0    |
| <i>PHF19</i>   | 1                       | 0                                      | 0                                      | 0                                                  | 0            | 1                     | 0    |
| <i>PHLDA1</i>  | 0                       | 0                                      | 0                                      | 1                                                  | 0            | 1                     | 0    |
| <i>PHLDB2</i>  | 1                       | 0                                      | 1                                      | 1                                                  | 1            | 1                     | 0    |
| <i>PHOX2A</i>  | 1                       | 0                                      | 0                                      | 0                                                  | 0            | 0                     | 0    |
| <i>PHTF2</i>   | 1                       | 0                                      | 1                                      | 0                                                  | 0            | 0                     | 0    |
| <i>PHYHIP</i>  | 0                       | 0                                      | 0                                      | 0                                                  | 0            | 0                     | 1    |
| <i>PIGL</i>    | 1                       | 0                                      | 0                                      | 0                                                  | 0            | 0                     | 0    |
| <i>PIGQ</i>    | 1                       | 0                                      | 0                                      | 0                                                  | 0            | 0                     | 0    |
| <i>PIGX</i>    | 0                       | 0                                      | 1                                      | 0                                                  | 0            | 0                     | 0    |
| <i>PIK3C2B</i> | 1                       | 0                                      | 0                                      | 0                                                  | 0            | 0                     | 0    |
| <i>PIK3CA</i>  | 0                       | 0                                      | 0                                      | 0                                                  | 0            | 1                     | 0    |
| <i>PIK3R1</i>  | 0                       | 0                                      | 0                                      | 0                                                  | 0            | 1                     | 0    |
| <i>PIK3R3</i>  | 1                       | 0                                      | 0                                      | 0                                                  | 0            | 0                     | 0    |
| <i>PILRA</i>   | 1                       | 0                                      | 0                                      | 0                                                  | 0            | 0                     | 0    |
| <i>PIMI</i>    | 1                       | 0                                      | 0                                      | 0                                                  | 0            | 0                     | 0    |
| <i>PINK1</i>   | 1                       | 0                                      | 0                                      | 0                                                  | 0            | 0                     | 0    |
| <i>PIP4K2A</i> | 1                       | 0                                      | 0                                      | 0                                                  | 0            | 0                     | 0    |
| <i>PIP5K1B</i> | 1                       | 0                                      | 0                                      | 0                                                  | 0            | 0                     | 0    |
| <i>PITPNA</i>  | 1                       | 0                                      | 0                                      | 0                                                  | 0            | 0                     | 0    |
| <i>PITPNC1</i> | 1                       | 0                                      | 0                                      | 0                                                  | 0            | 0                     | 0    |
| <i>PITX2</i>   | 1                       | 1                                      | 1                                      | 1                                                  | 1            | 1                     | 1    |
| <i>PITX3</i>   | 1                       | 0                                      | 1                                      | 0                                                  | 1            | 1                     | 0    |
| <i>PKD1</i>    | 1                       | 0                                      | 0                                      | 0                                                  | 0            | 0                     | 0    |
| <i>PKD2L1</i>  | 1                       | 0                                      | 0                                      | 0                                                  | 0            | 0                     | 0    |
| <i>PKD2L2</i>  | 1                       | 1                                      | 1                                      | 0                                                  | 1            | 1                     | 0    |
| <i>PKD4</i>    | 0                       | 0                                      | 0                                      | 0                                                  | 0            | 0                     | 1    |
| <i>PKHD1L1</i> | 0                       | 0                                      | 0                                      | 0                                                  | 0            | 1                     | 0    |
| <i>PKLR</i>    | 1                       | 0                                      | 0                                      | 0                                                  | 0            | 0                     | 0    |
| <i>PKN2</i>    | 0                       | 0                                      | 0                                      | 0                                                  | 0            | 1                     | 0    |
| <i>PKP2</i>    | 1                       | 0                                      | 1                                      | 1                                                  | 1            | 1                     | 0    |
| <i>PKS</i>     | 0                       | 0                                      | 0                                      | 0                                                  | 0            | 0                     | 1    |
| <i>PLA2G12</i> | 1                       | 0                                      | 0                                      | 0                                                  | 0            | 0                     | 0    |

| Gene           | Multi-omics integration | Gene-based result from AFGen 2017 GWAS | Gene-based result from AFGen 2018 GWAS | Meta-analysis of SNPs by two large AF GWAS in 2018 | GWAS catalog | Open Targets Platform | OMIM |
|----------------|-------------------------|----------------------------------------|----------------------------------------|----------------------------------------------------|--------------|-----------------------|------|
| <i>B</i>       |                         |                                        |                                        |                                                    |              |                       |      |
| <i>PLA2G1B</i> | 0                       | 0                                      | 0                                      | 0                                                  | 0            | 1                     | 0    |
| <i>PLA2G4A</i> | 1                       | 0                                      | 0                                      | 0                                                  | 0            | 0                     | 0    |
| <i>PLA2G4E</i> | 1                       | 0                                      | 0                                      | 0                                                  | 0            | 0                     | 0    |
| <i>PLA2G7</i>  | 1                       | 0                                      | 0                                      | 0                                                  | 0            | 1                     | 0    |
| <i>PLAC8</i>   | 1                       | 0                                      | 0                                      | 0                                                  | 0            | 0                     | 0    |
| <i>PLAT</i>    | 0                       | 0                                      | 0                                      | 0                                                  | 0            | 1                     | 1    |
| <i>PLAU</i>    | 0                       | 0                                      | 1                                      | 0                                                  | 0            | 1                     | 0    |
| <i>PLBD2</i>   | 1                       | 0                                      | 0                                      | 0                                                  | 0            | 0                     | 0    |
| <i>PLCD1</i>   | 1                       | 0                                      | 0                                      | 0                                                  | 0            | 0                     | 0    |
| <i>PLCD3</i>   | 1                       | 0                                      | 0                                      | 0                                                  | 0            | 0                     | 0    |
| <i>PLCG1</i>   | 0                       | 0                                      | 0                                      | 0                                                  | 1            | 1                     | 0    |
| <i>PLCL1</i>   | 1                       | 0                                      | 0                                      | 0                                                  | 0            | 0                     | 0    |
| <i>PLCXD2</i>  | 1                       | 0                                      | 1                                      | 0                                                  | 1            | 0                     | 0    |
| <i>PLCXD3</i>  | 0                       | 0                                      | 0                                      | 0                                                  | 0            | 0                     | 1    |
| <i>PLD1</i>    | 0                       | 0                                      | 0                                      | 0                                                  | 0            | 0                     | 1    |
| <i>PLD3</i>    | 1                       | 0                                      | 0                                      | 0                                                  | 0            | 0                     | 0    |
| <i>PLEC</i>    | 0                       | 0                                      | 0                                      | 0                                                  | 0            | 1                     | 0    |
| <i>PLEKHA3</i> | 1                       | 1                                      | 1                                      | 0                                                  | 0            | 0                     | 0    |
| <i>PLEKHG4</i> | 1                       | 0                                      | 0                                      | 0                                                  | 0            | 0                     | 0    |
| <i>B</i>       |                         |                                        |                                        |                                                    |              |                       |      |
| <i>PLEKHM2</i> | 1                       | 0                                      | 0                                      | 0                                                  | 0            | 0                     | 0    |
| <i>PLG</i>     | 1                       | 0                                      | 0                                      | 0                                                  | 0            | 1                     | 0    |
| <i>PLIN1</i>   | 1                       | 0                                      | 1                                      | 0                                                  | 0            | 0                     | 0    |
| <i>PLN</i>     | 1                       | 0                                      | 0                                      | 0                                                  | 0            | 1                     | 1    |
| <i>PLSCR3</i>  | 1                       | 0                                      | 0                                      | 0                                                  | 0            | 0                     | 0    |
| <i>PLXNC1</i>  | 1                       | 0                                      | 0                                      | 0                                                  | 0            | 0                     | 0    |
| <i>PLXND1</i>  | 1                       | 0                                      | 0                                      | 0                                                  | 0            | 0                     | 0    |
| <i>PMCH</i>    | 1                       | 0                                      | 0                                      | 0                                                  | 0            | 0                     | 0    |
| <i>PMP2</i>    | 1                       | 0                                      | 0                                      | 0                                                  | 0            | 0                     | 0    |
| <i>PMSE</i>    | 0                       | 0                                      | 0                                      | 0                                                  | 0            | 0                     | 1    |
| <i>PMVK</i>    | 1                       | 1                                      | 1                                      | 0                                                  | 0            | 0                     | 0    |
| <i>PNKD</i>    | 0                       | 0                                      | 0                                      | 0                                                  | 0            | 1                     | 0    |
| <i>PNMT</i>    | 1                       | 0                                      | 0                                      | 0                                                  | 0            | 0                     | 0    |
| <i>PNOC</i>    | 1                       | 0                                      | 0                                      | 0                                                  | 0            | 0                     | 0    |
| <i>PNPLA3</i>  | 1                       | 0                                      | 0                                      | 0                                                  | 0            | 0                     | 0    |
| <i>POC5</i>    | 0                       | 0                                      | 0                                      | 0                                                  | 1            | 1                     | 0    |
| <i>POFUT2</i>  | 1                       | 0                                      | 0                                      | 0                                                  | 0            | 0                     | 0    |
| <i>POLDIP3</i> | 1                       | 0                                      | 0                                      | 0                                                  | 0            | 0                     | 0    |
| <i>POLK</i>    | 0                       | 0                                      | 0                                      | 0                                                  | 1            | 1                     | 0    |
| <i>POLL</i>    | 1                       | 0                                      | 0                                      | 0                                                  | 0            | 0                     | 0    |
| <i>POLR1A</i>  | 1                       | 0                                      | 0                                      | 0                                                  | 0            | 0                     | 0    |
| <i>POLR1B</i>  | 1                       | 0                                      | 0                                      | 0                                                  | 0            | 0                     | 0    |

| Gene            | Multi-omics integration | Gene-based result from AFGen 2017 GWAS | Gene-based result from AFGen 2018 GWAS | Meta-analysis of SNPs by two large AF GWAS in 2018 | GWAS catalog | Open Targets Platform | OMIM |
|-----------------|-------------------------|----------------------------------------|----------------------------------------|----------------------------------------------------|--------------|-----------------------|------|
| <i>POLR2A</i>   | 0                       | 0                                      | 1                                      | 0                                                  | 1            | 1                     | 0    |
| <i>POLR2B</i>   | 1                       | 0                                      | 0                                      | 0                                                  | 0            | 0                     | 0    |
| <i>POLR2E</i>   | 1                       | 0                                      | 0                                      | 0                                                  | 0            | 0                     | 0    |
| <i>POLR3B</i>   | 1                       | 0                                      | 0                                      | 0                                                  | 0            | 0                     | 0    |
| <i>POLR3G</i>   | 1                       | 0                                      | 0                                      | 0                                                  | 0            | 1                     | 0    |
| <i>POMC</i>     | 1                       | 0                                      | 0                                      | 0                                                  | 0            | 1                     | 0    |
| <i>PON1</i>     | 0                       | 0                                      | 0                                      | 0                                                  | 0            | 1                     | 0    |
| <i>POP7</i>     | 1                       | 0                                      | 0                                      | 0                                                  | 0            | 0                     | 0    |
| <i>POR</i>      | 0                       | 0                                      | 0                                      | 0                                                  | 0            | 1                     | 0    |
| <i>POSTN</i>    | 0                       | 0                                      | 0                                      | 0                                                  | 0            | 1                     | 0    |
| <i>POU2F2</i>   | 1                       | 0                                      | 0                                      | 0                                                  | 0            | 0                     | 0    |
| <i>POU5F1</i>   | 0                       | 0                                      | 0                                      | 0                                                  | 0            | 1                     | 0    |
| <i>PPARA</i>    | 0                       | 0                                      | 0                                      | 0                                                  | 0            | 1                     | 0    |
| <i>PPARD</i>    | 0                       | 0                                      | 0                                      | 0                                                  | 0            | 1                     | 0    |
| <i>PPARG</i>    | 1                       | 0                                      | 0                                      | 0                                                  | 0            | 1                     | 0    |
| <i>PPARGC1A</i> | 0                       | 0                                      | 0                                      | 0                                                  | 0            | 1                     | 0    |
| <i>PPB</i>      | 0                       | 0                                      | 0                                      | 0                                                  | 0            | 0                     | 1    |
| <i>PPFIA4</i>   | 0                       | 0                                      | 0                                      | 1                                                  | 1            | 1                     | 0    |
| <i>PPFIBP1</i>  | 1                       | 0                                      | 0                                      | 0                                                  | 0            | 0                     | 0    |
| <i>PPH1</i>     | 0                       | 0                                      | 0                                      | 0                                                  | 0            | 0                     | 1    |
| <i>PPIA</i>     | 1                       | 0                                      | 0                                      | 0                                                  | 0            | 1                     | 0    |
| <i>PPIE</i>     | 1                       | 0                                      | 0                                      | 0                                                  | 0            | 0                     | 0    |
| <i>PPIL4</i>    | 1                       | 0                                      | 0                                      | 0                                                  | 0            | 0                     | 0    |
| <i>PPL</i>      | 1                       | 0                                      | 0                                      | 0                                                  | 0            | 0                     | 0    |
| <i>PPM1G</i>    | 0                       | 0                                      | 0                                      | 0                                                  | 1            | 1                     | 0    |
| <i>PPOX</i>     | 0                       | 0                                      | 0                                      | 0                                                  | 0            | 1                     | 0    |
| <i>PPP1CB</i>   | 0                       | 0                                      | 0                                      | 0                                                  | 0            | 0                     | 1    |
| <i>PPP1R12A</i> | 0                       | 0                                      | 0                                      | 0                                                  | 0            | 1                     | 0    |
| <i>PPP1R15B</i> | 1                       | 0                                      | 0                                      | 0                                                  | 0            | 0                     | 0    |
| <i>PPP1R16B</i> | 1                       | 0                                      | 0                                      | 0                                                  | 0            | 0                     | 0    |
| <i>PPP1R1B</i>  | 1                       | 0                                      | 0                                      | 0                                                  | 0            | 0                     | 0    |
| <i>PPP1R3E</i>  | 1                       | 0                                      | 0                                      | 0                                                  | 0            | 0                     | 0    |
| <i>PPP1R9B</i>  | 0                       | 0                                      | 0                                      | 0                                                  | 0            | 1                     | 0    |
| <i>PPP2R2B</i>  | 1                       | 0                                      | 0                                      | 0                                                  | 0            | 0                     | 0    |
| <i>PPP2R3A</i>  | 1                       | 0                                      | 0                                      | 1                                                  | 1            | 0                     | 0    |
| <i>PPP2R5C</i>  | 1                       | 0                                      | 0                                      | 0                                                  | 0            | 0                     | 0    |
| <i>PPP3CB</i>   | 1                       | 0                                      | 0                                      | 0                                                  | 0            | 0                     | 0    |
| <i>PPP4R1</i>   | 0                       | 0                                      | 0                                      | 0                                                  | 0            | 1                     | 0    |
| <i>PPP5C</i>    | 1                       | 0                                      | 0                                      | 0                                                  | 0            | 0                     | 0    |
| <i>PPRC1</i>    | 0                       | 0                                      | 0                                      | 0                                                  | 0            | 1                     | 0    |
| <i>PPT2</i>     | 1                       | 0                                      | 0                                      | 0                                                  | 0            | 0                     | 0    |

| Gene           | Multi-omics integration | Gene-based result from AFGen 2017 GWAS | Gene-based result from AFGen 2018 GWAS | Meta-analysis of SNPs by two large AF GWAS in 2018 | GWAS catalog | Open Targets Platform | OMIM |
|----------------|-------------------------|----------------------------------------|----------------------------------------|----------------------------------------------------|--------------|-----------------------|------|
| <i>PQBP1</i>   | 0                       | 0                                      | 0                                      | 0                                                  | 0            | 0                     | 1    |
| <i>PRAM1</i>   | 1                       | 0                                      | 0                                      | 0                                                  | 0            | 0                     | 0    |
| <i>PRDM16</i>  | 1                       | 0                                      | 0                                      | 0                                                  | 0            | 0                     | 1    |
| <i>PRDM8</i>   | 0                       | 0                                      | 0                                      | 0                                                  | 1            | 0                     | 0    |
| <i>PRDX2</i>   | 0                       | 0                                      | 0                                      | 0                                                  | 0            | 1                     | 0    |
| <i>PREP</i>    | 1                       | 0                                      | 0                                      | 0                                                  | 0            | 0                     | 0    |
| <i>PREX1</i>   | 0                       | 0                                      | 0                                      | 0                                                  | 0            | 1                     | 0    |
| <i>PRF1</i>    | 1                       | 0                                      | 0                                      | 0                                                  | 0            | 0                     | 0    |
| <i>PRH1</i>    | 0                       | 0                                      | 0                                      | 0                                                  | 0            | 1                     | 0    |
| <i>PRIM1</i>   | 1                       | 0                                      | 1                                      | 0                                                  | 0            | 0                     | 0    |
| <i>PRKAG2</i>  | 0                       | 0                                      | 0                                      | 0                                                  | 0            | 1                     | 1    |
| <i>PRKAR2B</i> | 1                       | 0                                      | 0                                      | 0                                                  | 0            | 0                     | 0    |
| <i>PRKCD</i>   | 1                       | 0                                      | 0                                      | 0                                                  | 0            | 0                     | 0    |
| <i>PRKCE</i>   | 1                       | 0                                      | 0                                      | 0                                                  | 0            | 0                     | 0    |
| <i>PRKD1</i>   | 0                       | 0                                      | 0                                      | 0                                                  | 0            | 1                     | 0    |
| <i>PRKD2</i>   | 0                       | 0                                      | 0                                      | 0                                                  | 0            | 1                     | 0    |
| <i>PRKD3</i>   | 1                       | 0                                      | 0                                      | 0                                                  | 0            | 0                     | 0    |
| <i>PRKG2</i>   | 1                       | 0                                      | 0                                      | 0                                                  | 0            | 0                     | 0    |
| <i>PRKN</i>    | 0                       | 0                                      | 0                                      | 0                                                  | 0            | 1                     | 0    |
| <i>PRKRA</i>   | 1                       | 0                                      | 1                                      | 0                                                  | 0            | 0                     | 0    |
| <i>PRL</i>     | 1                       | 0                                      | 0                                      | 0                                                  | 0            | 1                     | 0    |
| <i>PRMT2</i>   | 1                       | 0                                      | 0                                      | 0                                                  | 0            | 0                     | 0    |
| <i>PROK2</i>   | 1                       | 0                                      | 0                                      | 0                                                  | 0            | 0                     | 0    |
| <i>PROS1</i>   | 1                       | 0                                      | 0                                      | 0                                                  | 0            | 0                     | 0    |
| <i>PROX1</i>   | 1                       | 0                                      | 0                                      | 0                                                  | 0            | 1                     | 0    |
| <i>PROZ</i>    | 1                       | 0                                      | 0                                      | 0                                                  | 0            | 0                     | 0    |
| <i>PRPF40B</i> | 1                       | 0                                      | 0                                      | 0                                                  | 0            | 0                     | 0    |
| <i>PRR19</i>   | 1                       | 0                                      | 0                                      | 0                                                  | 0            | 0                     | 0    |
| <i>PRRT1</i>   | 1                       | 0                                      | 0                                      | 0                                                  | 0            | 0                     | 0    |
| <i>PRRX1</i>   | 1                       | 1                                      | 1                                      | 0                                                  | 1            | 1                     | 0    |
| <i>PRSS27</i>  | 0                       | 0                                      | 0                                      | 0                                                  | 0            | 1                     | 0    |
| <i>PRSS48</i>  | 1                       | 0                                      | 0                                      | 0                                                  | 0            | 0                     | 0    |
| <i>PSD</i>     | 1                       | 0                                      | 1                                      | 0                                                  | 0            | 0                     | 0    |
| <i>PSD2</i>    | 1                       | 0                                      | 0                                      | 0                                                  | 0            | 0                     | 0    |
| <i>PSD4</i>    | 0                       | 0                                      | 0                                      | 0                                                  | 0            | 1                     | 0    |
| <i>PSEN1</i>   | 1                       | 0                                      | 0                                      | 0                                                  | 0            | 0                     | 0    |
| <i>PSG7</i>    | 1                       | 0                                      | 0                                      | 0                                                  | 0            | 0                     | 0    |
| <i>PSMA1</i>   | 1                       | 0                                      | 0                                      | 0                                                  | 0            | 0                     | 0    |
| <i>PSMB10</i>  | 0                       | 0                                      | 0                                      | 0                                                  | 0            | 1                     | 0    |
| <i>PSMB3P</i>  | 0                       | 0                                      | 0                                      | 0                                                  | 1            | 0                     | 0    |
| <i>PSMB7</i>   | 0                       | 0                                      | 1                                      | 1                                                  | 1            | 1                     | 0    |
| <i>PSMC1P5</i> | 0                       | 0                                      | 0                                      | 0                                                  | 1            | 0                     | 0    |
| <i>PSMD2</i>   | 1                       | 0                                      | 0                                      | 0                                                  | 0            | 0                     | 0    |
| <i>PSMD3</i>   | 1                       | 0                                      | 0                                      | 0                                                  | 0            | 0                     | 0    |

| Gene            | Multi-omics integration | Gene-based result from AFGen 2017 GWAS | Gene-based result from AFGen 2018 GWAS | Meta-analysis of SNPs by two large AF GWAS in 2018 | GWAS catalog | Open Targets Platform | OMIM |
|-----------------|-------------------------|----------------------------------------|----------------------------------------|----------------------------------------------------|--------------|-----------------------|------|
| <i>PSME4</i>    | 1                       | 0                                      | 0                                      | 0                                                  | 0            | 0                     | 0    |
| <i>PSMF1</i>    | 0                       | 0                                      | 0                                      | 0                                                  | 0            | 1                     | 0    |
| <i>PSMG1</i>    | 1                       | 0                                      | 0                                      | 0                                                  | 0            | 1                     | 0    |
| <i>PSORS1C1</i> | 1                       | 0                                      | 0                                      | 0                                                  | 0            | 1                     | 0    |
| <i>PSPH</i>     | 1                       | 0                                      | 0                                      | 0                                                  | 0            | 0                     | 0    |
| <i>PSRC1</i>    | 0                       | 0                                      | 0                                      | 0                                                  | 0            | 1                     | 0    |
| <i>PTCD2</i>    | 1                       | 0                                      | 0                                      | 0                                                  | 0            | 0                     | 0    |
| <i>PTCD3</i>    | 1                       | 0                                      | 0                                      | 0                                                  | 0            | 0                     | 0    |
| <i>PTCH1</i>    | 0                       | 0                                      | 0                                      | 0                                                  | 0            | 0                     | 1    |
| <i>PTEN</i>     | 0                       | 0                                      | 0                                      | 0                                                  | 0            | 0                     | 1    |
| <i>PTER</i>     | 0                       | 0                                      | 0                                      | 0                                                  | 0            | 1                     | 0    |
| <i>PTGDS</i>    | 0                       | 0                                      | 0                                      | 0                                                  | 0            | 1                     | 0    |
| <i>PTGES3</i>   | 0                       | 0                                      | 0                                      | 0                                                  | 1            | 0                     | 0    |
| <i>PTGS1</i>    | 0                       | 0                                      | 0                                      | 0                                                  | 0            | 1                     | 0    |
| <i>PTGS2</i>    | 0                       | 0                                      | 0                                      | 0                                                  | 0            | 1                     | 0    |
| <i>PTH</i>      | 0                       | 0                                      | 0                                      | 0                                                  | 0            | 1                     | 0    |
| <i>PTH1R</i>    | 1                       | 0                                      | 0                                      | 0                                                  | 0            | 0                     | 0    |
| <i>PTK2</i>     | 1                       | 0                                      | 1                                      | 1                                                  | 1            | 1                     | 1    |
| <i>PTLS</i>     | 0                       | 0                                      | 0                                      | 0                                                  | 0            | 0                     | 1    |
| <i>PTP4A1</i>   | 1                       | 0                                      | 0                                      | 0                                                  | 0            | 0                     | 0    |
| <i>PTP4A2</i>   | 1                       | 0                                      | 0                                      | 0                                                  | 0            | 0                     | 0    |
| <i>PTPN11</i>   | 0                       | 0                                      | 0                                      | 0                                                  | 0            | 1                     | 1    |
| <i>PTPN12</i>   | 1                       | 0                                      | 0                                      | 0                                                  | 0            | 0                     | 0    |
| <i>PTPN22</i>   | 1                       | 0                                      | 0                                      | 0                                                  | 0            | 0                     | 0    |
| <i>PTPN9</i>    | 1                       | 0                                      | 0                                      | 0                                                  | 0            | 0                     | 0    |
| <i>PTPRA</i>    | 1                       | 0                                      | 0                                      | 0                                                  | 0            | 0                     | 0    |
| <i>PTPRC</i>    | 0                       | 0                                      | 0                                      | 0                                                  | 0            | 1                     | 0    |
| <i>PTPRG</i>    | 0                       | 0                                      | 0                                      | 0                                                  | 0            | 1                     | 0    |
| <i>PTPRN</i>    | 1                       | 0                                      | 0                                      | 0                                                  | 0            | 0                     | 0    |
| <i>PTPRU</i>    | 1                       | 0                                      | 0                                      | 0                                                  | 0            | 1                     | 0    |
| <i>PTPRZ1</i>   | 1                       | 0                                      | 0                                      | 0                                                  | 0            | 0                     | 0    |
| <i>PTRH1</i>    | 1                       | 0                                      | 0                                      | 0                                                  | 0            | 0                     | 0    |
| <i>PTS</i>      | 0                       | 0                                      | 0                                      | 0                                                  | 0            | 1                     | 0    |
| <i>PTX3</i>     | 1                       | 0                                      | 0                                      | 0                                                  | 0            | 0                     | 0    |
| <i>PUM2</i>     | 1                       | 0                                      | 0                                      | 0                                                  | 0            | 0                     | 0    |
| <i>PURA</i>     | 1                       | 0                                      | 0                                      | 0                                                  | 0            | 0                     | 0    |
| <i>PVALB</i>    | 1                       | 0                                      | 0                                      | 0                                                  | 0            | 0                     | 0    |
| <i>PVOD1</i>    | 0                       | 0                                      | 0                                      | 0                                                  | 0            | 0                     | 1    |
| <i>PVR</i>      | 0                       | 0                                      | 0                                      | 0                                                  | 0            | 1                     | 0    |
| <i>PXE</i>      | 0                       | 0                                      | 0                                      | 0                                                  | 0            | 0                     | 1    |
| <i>PXK</i>      | 1                       | 0                                      | 0                                      | 0                                                  | 0            | 0                     | 0    |
| <i>PXN</i>      | 1                       | 0                                      | 0                                      | 1                                                  | 0            | 0                     | 0    |
| <i>PYCR2</i>    | 1                       | 0                                      | 0                                      | 0                                                  | 0            | 0                     | 0    |

| Gene             | Multi-omics integration | Gene-based result from AFGen 2017 GWAS | Gene-based result from AFGen 2018 GWAS | Meta-analysis of SNPs by two large AF GWAS in 2018 | GWAS catalog | Open Targets Platform | OMIM |
|------------------|-------------------------|----------------------------------------|----------------------------------------|----------------------------------------------------|--------------|-----------------------|------|
| <i>PYGO2</i>     | 1                       | 1                                      | 1                                      | 0                                                  | 0            | 0                     | 0    |
| <i>QPCT</i>      | 1                       | 0                                      | 0                                      | 0                                                  | 0            | 0                     | 0    |
| <i>QSOX2</i>     | 1                       | 0                                      | 0                                      | 0                                                  | 0            | 0                     | 0    |
| <i>RAB10</i>     | 1                       | 0                                      | 0                                      | 0                                                  | 0            | 0                     | 0    |
| <i>RAB11B</i>    | 1                       | 0                                      | 0                                      | 0                                                  | 0            | 0                     | 0    |
| <i>RAB11FIP3</i> | 1                       | 0                                      | 0                                      | 0                                                  | 0            | 0                     | 0    |
| <i>RAB12</i>     | 0                       | 0                                      | 0                                      | 0                                                  | 0            | 1                     | 0    |
| <i>RAB17</i>     | 1                       | 0                                      | 0                                      | 0                                                  | 0            | 0                     | 0    |
| <i>RAB1A</i>     | 1                       | 1                                      | 1                                      | 0                                                  | 0            | 0                     | 0    |
| <i>RAB25</i>     | 1                       | 0                                      | 0                                      | 0                                                  | 0            | 0                     | 0    |
| <i>RAB26</i>     | 1                       | 0                                      | 0                                      | 0                                                  | 0            | 0                     | 0    |
| <i>RAB40C</i>    | 1                       | 0                                      | 0                                      | 0                                                  | 0            | 0                     | 0    |
| <i>RAB8B</i>     | 1                       | 0                                      | 0                                      | 0                                                  | 0            | 0                     | 0    |
| <i>RABAC1</i>    | 1                       | 0                                      | 0                                      | 0                                                  | 0            | 0                     | 0    |
| <i>RABEP2</i>    | 1                       | 0                                      | 0                                      | 0                                                  | 0            | 0                     | 0    |
| <i>RABGEF1</i>   | 1                       | 0                                      | 0                                      | 0                                                  | 0            | 0                     | 0    |
| <i>RACGAP1</i>   | 1                       | 0                                      | 0                                      | 0                                                  | 0            | 0                     | 0    |
| <i>RAF1</i>      | 1                       | 0                                      | 1                                      | 0                                                  | 0            | 0                     | 1    |
| <i>RAI</i>       | 0                       | 0                                      | 0                                      | 0                                                  | 0            | 0                     | 1    |
| <i>RALA</i>      | 1                       | 0                                      | 0                                      | 0                                                  | 0            | 0                     | 0    |
| <i>RANP6</i>     | 0                       | 0                                      | 0                                      | 0                                                  | 1            | 0                     | 0    |
| <i>RAPGEF5</i>   | 0                       | 0                                      | 0                                      | 0                                                  | 0            | 1                     | 0    |
| <i>RARRES2</i>   | 0                       | 0                                      | 0                                      | 0                                                  | 0            | 1                     | 0    |
| <i>RARS2</i>     | 1                       | 0                                      | 0                                      | 0                                                  | 0            | 0                     | 0    |
| <i>RASAI</i>     | 0                       | 0                                      | 0                                      | 0                                                  | 0            | 1                     | 0    |
| <i>RASA2</i>     | 1                       | 0                                      | 0                                      | 0                                                  | 0            | 0                     | 0    |
| <i>RASAL1</i>    | 1                       | 0                                      | 0                                      | 0                                                  | 0            | 0                     | 0    |
| <i>RASGRP2</i>   | 1                       | 0                                      | 0                                      | 0                                                  | 0            | 0                     | 0    |
| <i>RASL10B</i>   | 0                       | 0                                      | 0                                      | 0                                                  | 0            | 0                     | 1    |
| <i>RASL12</i>    | 0                       | 0                                      | 0                                      | 0                                                  | 0            | 1                     | 0    |
| <i>RAVER1</i>    | 1                       | 0                                      | 0                                      | 0                                                  | 0            | 0                     | 0    |
| <i>RBBP5</i>     | 1                       | 0                                      | 0                                      | 0                                                  | 0            | 0                     | 0    |
| <i>RBM10</i>     | 0                       | 0                                      | 0                                      | 0                                                  | 0            | 0                     | 1    |
| <i>RBM20</i>     | 0                       | 0                                      | 0                                      | 1                                                  | 1            | 1                     | 0    |
| <i>RBM24</i>     | 1                       | 0                                      | 0                                      | 0                                                  | 0            | 0                     | 0    |
| <i>RBM25</i>     | 1                       | 0                                      | 0                                      | 0                                                  | 0            | 0                     | 0    |
| <i>RBM43</i>     | 1                       | 0                                      | 0                                      | 0                                                  | 0            | 0                     | 0    |
| <i>RBM4B</i>     | 1                       | 0                                      | 0                                      | 0                                                  | 0            | 0                     | 0    |
| <i>RBMS2</i>     | 1                       | 0                                      | 0                                      | 0                                                  | 0            | 0                     | 0    |
| <i>RBPMS</i>     | 0                       | 0                                      | 0                                      | 0                                                  | 0            | 1                     | 0    |
| <i>RBS</i>       | 0                       | 0                                      | 0                                      | 0                                                  | 0            | 0                     | 1    |
| <i>RCAN1</i>     | 1                       | 0                                      | 0                                      | 0                                                  | 0            | 0                     | 0    |
| <i>RCDP1</i>     | 0                       | 0                                      | 0                                      | 0                                                  | 0            | 0                     | 1    |



| Gene           | Multi-omics integration | Gene-based result from AFGen 2017 GWAS | Gene-based result from AFGen 2018 GWAS | Meta-analysis of SNPs by two large AF GWAS in 2018 | GWAS catalog | Open Targets Platform | OMIM |
|----------------|-------------------------|----------------------------------------|----------------------------------------|----------------------------------------------------|--------------|-----------------------|------|
| <i>RCM1</i>    | 0                       | 0                                      | 0                                      | 0                                                  | 0            | 0                     | 1    |
| <i>RCM3</i>    | 0                       | 0                                      | 0                                      | 0                                                  | 0            | 0                     | 1    |
| <i>RCN1P1</i>  | 0                       | 0                                      | 0                                      | 0                                                  | 1            | 0                     | 0    |
| <i>RCN2</i>    | 1                       | 0                                      | 0                                      | 0                                                  | 0            | 0                     | 0    |
| <i>RDX</i>     | 1                       | 0                                      | 0                                      | 0                                                  | 0            | 0                     | 0    |
| <i>RECQL5</i>  | 1                       | 0                                      | 0                                      | 0                                                  | 0            | 0                     | 0    |
| <i>REEP1</i>   | 1                       | 0                                      | 0                                      | 1                                                  | 1            | 1                     | 0    |
| <i>REEP2</i>   | 1                       | 0                                      | 1                                      | 0                                                  | 0            | 0                     | 0    |
| <i>REEP3</i>   | 0                       | 0                                      | 1                                      | 1                                                  | 1            | 1                     | 0    |
| <i>REEP4</i>   | 1                       | 0                                      | 0                                      | 0                                                  | 0            | 0                     | 0    |
| <i>REEP5</i>   | 1                       | 0                                      | 0                                      | 0                                                  | 0            | 0                     | 0    |
| <i>REN</i>     | 1                       | 0                                      | 0                                      | 0                                                  | 0            | 1                     | 1    |
| <i>RENS1</i>   | 0                       | 0                                      | 0                                      | 0                                                  | 0            | 0                     | 1    |
| <i>RET</i>     | 0                       | 0                                      | 0                                      | 0                                                  | 0            | 1                     | 0    |
| <i>RETN</i>    | 0                       | 0                                      | 0                                      | 0                                                  | 0            | 1                     | 0    |
| <i>RFH1</i>    | 0                       | 0                                      | 0                                      | 0                                                  | 0            | 0                     | 1    |
| <i>RFMN</i>    | 0                       | 0                                      | 0                                      | 0                                                  | 0            | 0                     | 1    |
| <i>RFT1</i>    | 1                       | 0                                      | 0                                      | 0                                                  | 0            | 0                     | 0    |
| <i>RFTN1</i>   | 0                       | 0                                      | 0                                      | 0                                                  | 0            | 1                     | 0    |
| <i>RFTN2</i>   | 1                       | 0                                      | 0                                      | 0                                                  | 0            | 0                     | 0    |
| <i>RFX1</i>    | 1                       | 0                                      | 0                                      | 0                                                  | 0            | 0                     | 0    |
| <i>RFX4</i>    | 1                       | 0                                      | 0                                      | 0                                                  | 0            | 0                     | 0    |
| <i>RGS3</i>    | 1                       | 0                                      | 0                                      | 0                                                  | 0            | 0                     | 0    |
| <i>RGS4</i>    | 0                       | 0                                      | 0                                      | 0                                                  | 0            | 1                     | 0    |
| <i>RGS6</i>    | 0                       | 0                                      | 0                                      | 0                                                  | 0            | 1                     | 0    |
| <i>RHBDF2</i>  | 1                       | 0                                      | 0                                      | 0                                                  | 0            | 0                     | 0    |
| <i>RHBDL1</i>  | 1                       | 0                                      | 0                                      | 0                                                  | 0            | 0                     | 0    |
| <i>RHBDL2</i>  | 1                       | 0                                      | 0                                      | 0                                                  | 0            | 0                     | 0    |
| <i>RHBG</i>    | 1                       | 0                                      | 0                                      | 0                                                  | 0            | 0                     | 0    |
| <i>RHD</i>     | 0                       | 0                                      | 0                                      | 0                                                  | 0            | 1                     | 0    |
| <i>RHOA</i>    | 0                       | 0                                      | 0                                      | 0                                                  | 0            | 1                     | 0    |
| <i>RHOB</i>    | 1                       | 0                                      | 0                                      | 0                                                  | 0            | 0                     | 0    |
| <i>RHOBTB1</i> | 1                       | 0                                      | 0                                      | 0                                                  | 0            | 0                     | 0    |
| <i>RHOD</i>    | 1                       | 0                                      | 0                                      | 0                                                  | 0            | 0                     | 0    |
| <i>RHOJ</i>    | 0                       | 0                                      | 0                                      | 0                                                  | 0            | 1                     | 0    |
| <i>RHOT2</i>   | 1                       | 0                                      | 0                                      | 0                                                  | 0            | 0                     | 0    |
| <i>RHPD1</i>   | 0                       | 0                                      | 0                                      | 0                                                  | 0            | 0                     | 1    |
| <i>RHPD2</i>   | 0                       | 0                                      | 0                                      | 0                                                  | 0            | 0                     | 1    |
| <i>RIC3</i>    | 1                       | 0                                      | 0                                      | 0                                                  | 0            | 0                     | 0    |
| <i>RIEG3</i>   | 0                       | 0                                      | 0                                      | 0                                                  | 0            | 0                     | 1    |
| <i>RIMKLB</i>  | 1                       | 0                                      | 0                                      | 0                                                  | 0            | 0                     | 0    |
| <i>RIMS3</i>   | 1                       | 0                                      | 0                                      | 0                                                  | 0            | 0                     | 0    |
| <i>RIN1</i>    | 1                       | 0                                      | 0                                      | 0                                                  | 0            | 0                     | 0    |
| <i>RIT1</i>    | 1                       | 0                                      | 0                                      | 0                                                  | 0            | 0                     | 0    |

| Gene                        | Multi-omics integration | Gene-based result from AFGen 2017 GWAS | Gene-based result from AFGen 2018 GWAS | Meta-analysis of SNPs by two large AF GWAS in 2018 | GWAS catalog | Open Targets Platform | OMIM |
|-----------------------------|-------------------------|----------------------------------------|----------------------------------------|----------------------------------------------------|--------------|-----------------------|------|
| <i>RN7SKP1</i><br><i>55</i> | 0                       | 0                                      | 0                                      | 0                                                  | 1            | 0                     | 0    |
| <i>RN7SL728</i><br><i>P</i> | 0                       | 0                                      | 0                                      | 0                                                  | 1            | 0                     | 0    |
| <i>RN7SL734</i><br><i>P</i> | 0                       | 0                                      | 0                                      | 0                                                  | 1            | 0                     | 0    |
| <i>RNASEH2</i><br><i>B</i>  | 1                       | 0                                      | 0                                      | 0                                                  | 0            | 0                     | 0    |
| <i>RNF10</i>                | 1                       | 0                                      | 0                                      | 0                                                  | 0            | 0                     | 0    |
| <i>RNF103</i>               | 1                       | 0                                      | 0                                      | 0                                                  | 0            | 0                     | 0    |
| <i>RNF11</i>                | 1                       | 0                                      | 0                                      | 0                                                  | 0            | 0                     | 0    |
| <i>RNF144B</i>              | 1                       | 0                                      | 1                                      | 0                                                  | 0            | 0                     | 0    |
| <i>RNF212</i>               | 1                       | 0                                      | 0                                      | 0                                                  | 0            | 0                     | 0    |
| <i>RNF6</i>                 | 1                       | 0                                      | 0                                      | 0                                                  | 0            | 0                     | 0    |
| <i>RNH1</i>                 | 0                       | 0                                      | 0                                      | 0                                                  | 0            | 1                     | 0    |
| <i>RNLS</i>                 | 0                       | 0                                      | 0                                      | 0                                                  | 0            | 1                     | 0    |
| <i>RNPEP</i>                | 0                       | 0                                      | 0                                      | 0                                                  | 0            | 1                     | 0    |
| <i>RNU1-18P</i>             | 0                       | 0                                      | 0                                      | 0                                                  | 1            | 0                     | 0    |
| <i>RNU6-1148P</i>           | 0                       | 0                                      | 0                                      | 0                                                  | 1            | 0                     | 0    |
| <i>RNU6-289P</i>            | 0                       | 0                                      | 0                                      | 1                                                  | 1            | 0                     | 0    |
| <i>RNU6-745P</i>            | 0                       | 0                                      | 0                                      | 1                                                  | 1            | 0                     | 0    |
| <i>RNU7-2P</i>              | 0                       | 0                                      | 0                                      | 0                                                  | 1            | 0                     | 0    |
| <i>ROBO1</i>                | 1                       | 0                                      | 0                                      | 0                                                  | 0            | 0                     | 0    |
| <i>ROCK1</i>                | 0                       | 0                                      | 0                                      | 0                                                  | 0            | 1                     | 0    |
| <i>ROCK2</i>                | 0                       | 0                                      | 0                                      | 0                                                  | 0            | 1                     | 0    |
| <i>RORC</i>                 | 1                       | 0                                      | 0                                      | 0                                                  | 0            | 0                     | 0    |
| <i>ROS1</i>                 | 0                       | 0                                      | 0                                      | 0                                                  | 0            | 1                     | 0    |
| <i>RP9</i>                  | 1                       | 0                                      | 0                                      | 0                                                  | 0            | 0                     | 0    |
| <i>RPE</i>                  | 0                       | 0                                      | 0                                      | 0                                                  | 0            | 1                     | 0    |
| <i>RPL12P6</i>              | 0                       | 0                                      | 0                                      | 0                                                  | 1            | 0                     | 0    |
| <i>RPL13AP</i><br><i>24</i> | 0                       | 0                                      | 0                                      | 0                                                  | 1            | 0                     | 0    |
| <i>RPL17</i>                | 0                       | 0                                      | 0                                      | 0                                                  | 0            | 1                     | 0    |
| <i>RPL35P2</i>              | 0                       | 0                                      | 0                                      | 0                                                  | 1            | 0                     | 0    |
| <i>RPL36AP</i><br><i>23</i> | 0                       | 0                                      | 0                                      | 1                                                  | 1            | 0                     | 0    |
| <i>RPL3L</i>                | 1                       | 0                                      | 0                                      | 1                                                  | 1            | 1                     | 0    |
| <i>RPL7AP7</i><br><i>3</i>  | 0                       | 0                                      | 0                                      | 0                                                  | 1            | 0                     | 0    |
| <i>RPLP0</i>                | 0                       | 0                                      | 0                                      | 0                                                  | 0            | 1                     | 0    |
| <i>RPLP1</i>                | 0                       | 0                                      | 0                                      | 0                                                  | 0            | 1                     | 0    |
| <i>RPRML</i>                | 1                       | 0                                      | 0                                      | 0                                                  | 0            | 0                     | 0    |
| <i>RPS15A</i>               | 1                       | 0                                      | 0                                      | 0                                                  | 0            | 0                     | 0    |

| Gene           | Multi-omics integration | Gene-based result from AFGen 2017 GWAS | Gene-based result from AFGen 2018 GWAS | Meta-analysis of SNPs by two large AF GWAS in 2018 | GWAS catalog | Open Targets Platform | OMIM |
|----------------|-------------------------|----------------------------------------|----------------------------------------|----------------------------------------------------|--------------|-----------------------|------|
| <i>RPS17</i>   | 0                       | 0                                      | 0                                      | 0                                                  | 0            | 0                     | 1    |
| <i>RPS2</i>    | 1                       | 0                                      | 1                                      | 0                                                  | 1            | 0                     | 0    |
| <i>RRAD</i>    | 0                       | 0                                      | 0                                      | 0                                                  | 0            | 1                     | 0    |
| <i>RRAGC</i>   | 1                       | 0                                      | 0                                      | 0                                                  | 0            | 0                     | 0    |
| <i>RRBP1</i>   | 0                       | 0                                      | 0                                      | 0                                                  | 0            | 1                     | 0    |
| <i>RREB1</i>   | 1                       | 0                                      | 0                                      | 0                                                  | 0            | 0                     | 0    |
| <i>RRM1</i>    | 1                       | 0                                      | 0                                      | 0                                                  | 0            | 1                     | 0    |
| <i>RRM2</i>    | 0                       | 0                                      | 0                                      | 0                                                  | 0            | 1                     | 0    |
| <i>RRP12</i>   | 1                       | 0                                      | 0                                      | 0                                                  | 0            | 0                     | 0    |
| <i>RRS</i>     | 0                       | 0                                      | 0                                      | 0                                                  | 0            | 0                     | 1    |
| <i>RSBN1</i>   | 0                       | 0                                      | 0                                      | 0                                                  | 0            | 1                     | 0    |
| <i>RSBNIL</i>  | 1                       | 0                                      | 0                                      | 0                                                  | 0            | 0                     | 0    |
| <i>RSC1A1</i>  | 1                       | 0                                      | 0                                      | 0                                                  | 0            | 0                     | 0    |
| <i>RSPH6A</i>  | 1                       | 0                                      | 0                                      | 0                                                  | 0            | 0                     | 0    |
| <i>RSTS1</i>   | 0                       | 0                                      | 0                                      | 0                                                  | 0            | 0                     | 1    |
| <i>RTN3</i>    | 1                       | 0                                      | 0                                      | 0                                                  | 0            | 0                     | 0    |
| <i>RTSC1</i>   | 0                       | 0                                      | 0                                      | 0                                                  | 0            | 0                     | 1    |
| <i>RTSC2</i>   | 0                       | 0                                      | 0                                      | 0                                                  | 0            | 0                     | 1    |
| <i>RUNX1</i>   | 1                       | 0                                      | 0                                      | 0                                                  | 0            | 0                     | 0    |
| <i>RUNX3</i>   | 1                       | 0                                      | 0                                      | 0                                                  | 0            | 0                     | 0    |
| <i>RUSC1</i>   | 1                       | 0                                      | 0                                      | 0                                                  | 0            | 0                     | 0    |
| <i>RWDD3</i>   | 0                       | 0                                      | 0                                      | 0                                                  | 0            | 1                     | 0    |
| <i>RXFP4</i>   | 1                       | 0                                      | 0                                      | 0                                                  | 0            | 0                     | 0    |
| <i>RXRA</i>    | 0                       | 0                                      | 0                                      | 0                                                  | 0            | 1                     | 1    |
| <i>RYBP</i>    | 1                       | 0                                      | 0                                      | 0                                                  | 0            | 0                     | 0    |
| <i>RYR2</i>    | 0                       | 0                                      | 0                                      | 0                                                  | 0            | 1                     | 1    |
| <i>S100A13</i> | 1                       | 0                                      | 0                                      | 0                                                  | 0            | 0                     | 0    |
| <i>S100A14</i> | 1                       | 0                                      | 0                                      | 0                                                  | 0            | 0                     | 0    |
| <i>S100A16</i> | 1                       | 0                                      | 0                                      | 0                                                  | 0            | 0                     | 0    |
| <i>S100B</i>   | 0                       | 0                                      | 0                                      | 0                                                  | 0            | 1                     | 0    |
| <i>S1PR2</i>   | 1                       | 0                                      | 0                                      | 0                                                  | 0            | 0                     | 1    |
| <i>S1PR3</i>   | 0                       | 0                                      | 0                                      | 0                                                  | 0            | 0                     | 1    |
| <i>SACS</i>    | 1                       | 0                                      | 0                                      | 0                                                  | 0            | 0                     | 0    |
| <i>SALL1</i>   | 0                       | 0                                      | 0                                      | 0                                                  | 0            | 1                     | 0    |
| <i>SALL4</i>   | 0                       | 0                                      | 0                                      | 0                                                  | 0            | 1                     | 0    |
| <i>SALMY</i>   | 0                       | 0                                      | 0                                      | 0                                                  | 0            | 0                     | 1    |
| <i>SAMD4A</i>  | 1                       | 0                                      | 0                                      | 0                                                  | 0            | 0                     | 0    |
| <i>SAMD8</i>   | 1                       | 0                                      | 0                                      | 0                                                  | 0            | 0                     | 0    |
| <i>SAMM50</i>  | 1                       | 0                                      | 0                                      | 0                                                  | 0            | 0                     | 0    |
| <i>SATB1</i>   | 1                       | 0                                      | 0                                      | 0                                                  | 0            | 0                     | 0    |
| <i>SATB2</i>   | 1                       | 0                                      | 0                                      | 0                                                  | 0            | 1                     | 0    |
| <i>SBNO1</i>   | 0                       | 0                                      | 0                                      | 0                                                  | 0            | 1                     | 0    |
| <i>SBNO2</i>   | 1                       | 0                                      | 0                                      | 0                                                  | 0            | 0                     | 0    |
| <i>SCA18</i>   | 0                       | 0                                      | 0                                      | 0                                                  | 0            | 0                     | 1    |

| Gene           | Multi-omics integration | Gene-based result from AFGen 2017 GWAS | Gene-based result from AFGen 2018 GWAS | Meta-analysis of SNPs by two large AF GWAS in 2018 | GWAS catalog | Open Targets Platform | OMIM |
|----------------|-------------------------|----------------------------------------|----------------------------------------|----------------------------------------------------|--------------|-----------------------|------|
| <i>SCAMP3</i>  | 1                       | 0                                      | 0                                      | 0                                                  | 0            | 0                     | 0    |
| <i>SCAMP4</i>  | 1                       | 0                                      | 0                                      | 0                                                  | 0            | 0                     | 0    |
| <i>SCAPER</i>  | 1                       | 0                                      | 0                                      | 0                                                  | 0            | 0                     | 0    |
| <i>SCARA3</i>  | 0                       | 0                                      | 0                                      | 0                                                  | 0            | 1                     | 0    |
| <i>SCARB1</i>  | 0                       | 0                                      | 0                                      | 0                                                  | 0            | 1                     | 0    |
| <i>SCD</i>     | 0                       | 0                                      | 0                                      | 0                                                  | 0            | 1                     | 0    |
| <i>SCD5</i>    | 1                       | 0                                      | 0                                      | 0                                                  | 0            | 0                     | 0    |
| <i>SCDO1</i>   | 0                       | 0                                      | 0                                      | 0                                                  | 0            | 0                     | 1    |
| <i>SCG5</i>    | 1                       | 0                                      | 0                                      | 0                                                  | 0            | 0                     | 0    |
| <i>SCGN</i>    | 0                       | 0                                      | 0                                      | 0                                                  | 0            | 1                     | 0    |
| <i>SCHIP1</i>  | 1                       | 0                                      | 0                                      | 0                                                  | 0            | 0                     | 0    |
| <i>SCKL9</i>   | 0                       | 0                                      | 0                                      | 0                                                  | 0            | 0                     | 1    |
| <i>SCLT1</i>   | 0                       | 0                                      | 0                                      | 0                                                  | 0            | 0                     | 1    |
| <i>SCLY</i>    | 1                       | 0                                      | 0                                      | 0                                                  | 0            | 0                     | 0    |
| <i>SCMH1</i>   | 1                       | 0                                      | 0                                      | 1                                                  | 1            | 1                     | 0    |
| <i>SCN10A</i>  | 1                       | 0                                      | 1                                      | 1                                                  | 1            | 1                     | 0    |
| <i>SCN11A</i>  | 0                       | 0                                      | 0                                      | 0                                                  | 0            | 1                     | 0    |
| <i>SCN1A</i>   | 0                       | 0                                      | 0                                      | 0                                                  | 0            | 1                     | 0    |
| <i>SCN1B</i>   | 0                       | 0                                      | 0                                      | 0                                                  | 0            | 0                     | 1    |
| <i>SCN2A</i>   | 0                       | 0                                      | 0                                      | 0                                                  | 0            | 1                     | 0    |
| <i>SCN2B</i>   | 0                       | 0                                      | 0                                      | 0                                                  | 0            | 1                     | 1    |
| <i>SCN3A</i>   | 0                       | 0                                      | 0                                      | 0                                                  | 0            | 1                     | 0    |
| <i>SCN3B</i>   | 0                       | 0                                      | 0                                      | 0                                                  | 0            | 1                     | 1    |
| <i>SCN4</i>    | 0                       | 0                                      | 0                                      | 0                                                  | 0            | 0                     | 1    |
| <i>SCN4A</i>   | 0                       | 0                                      | 0                                      | 0                                                  | 0            | 1                     | 0    |
| <i>SCN4B</i>   | 0                       | 0                                      | 0                                      | 0                                                  | 0            | 1                     | 1    |
| <i>SCN5A</i>   | 1                       | 0                                      | 1                                      | 1                                                  | 1            | 1                     | 1    |
| <i>SCN7A</i>   | 0                       | 0                                      | 0                                      | 0                                                  | 0            | 1                     | 0    |
| <i>SCN8A</i>   | 0                       | 0                                      | 0                                      | 0                                                  | 0            | 1                     | 0    |
| <i>SCN9A</i>   | 0                       | 0                                      | 0                                      | 0                                                  | 0            | 1                     | 0    |
| <i>SCRN3</i>   | 1                       | 0                                      | 0                                      | 0                                                  | 0            | 0                     | 0    |
| <i>SCT</i>     | 0                       | 0                                      | 0                                      | 0                                                  | 0            | 1                     | 0    |
| <i>SCUBE3</i>  | 1                       | 0                                      | 0                                      | 0                                                  | 0            | 0                     | 0    |
| <i>SCYL1</i>   | 1                       | 0                                      | 0                                      | 0                                                  | 0            | 0                     | 0    |
| <i>SCYL3</i>   | 1                       | 0                                      | 0                                      | 0                                                  | 0            | 0                     | 0    |
| <i>SDC1</i>    | 0                       | 0                                      | 0                                      | 0                                                  | 0            | 1                     | 0    |
| <i>SDC2</i>    | 1                       | 0                                      | 0                                      | 0                                                  | 0            | 0                     | 0    |
| <i>SDC4</i>    | 0                       | 0                                      | 0                                      | 0                                                  | 0            | 1                     | 0    |
| <i>SDCCAG8</i> | 1                       | 0                                      | 0                                      | 0                                                  | 0            | 0                     | 0    |
| <i>SDDHD</i>   | 0                       | 0                                      | 0                                      | 0                                                  | 0            | 0                     | 1    |
| <i>SDK1</i>    | 1                       | 0                                      | 0                                      | 0                                                  | 0            | 0                     | 0    |
| <i>SEC14L2</i> | 1                       | 0                                      | 0                                      | 0                                                  | 0            | 0                     | 0    |
| <i>SEC22B</i>  | 1                       | 0                                      | 0                                      | 0                                                  | 0            | 0                     | 0    |
| <i>SEC24C</i>  | 0                       | 1                                      | 1                                      | 0                                                  | 0            | 0                     | 0    |

| Gene             | Multi-omics integration | Gene-based result from AFGen 2017 GWAS | Gene-based result from AFGen 2018 GWAS | Meta-analysis of SNPs by two large AF GWAS in 2018 | GWAS catalog | Open Targets Platform | OMIM |
|------------------|-------------------------|----------------------------------------|----------------------------------------|----------------------------------------------------|--------------|-----------------------|------|
| <i>SEC31A</i>    | 0                       | 1                                      | 1                                      | 0                                                  | 0            | 0                     | 0    |
| <i>SEC61A1</i>   | 1                       | 0                                      | 0                                      | 0                                                  | 0            | 0                     | 0    |
| <i>SELE</i>      | 1                       | 0                                      | 0                                      | 0                                                  | 0            | 1                     | 0    |
| <i>SELENBP1</i>  | 1                       | 0                                      | 0                                      | 0                                                  | 0            | 0                     | 0    |
| <i>SELL</i>      | 1                       | 0                                      | 0                                      | 0                                                  | 0            | 0                     | 0    |
| <i>SELP</i>      | 1                       | 0                                      | 0                                      | 0                                                  | 0            | 1                     | 0    |
| <i>SEMA3A</i>    | 0                       | 0                                      | 0                                      | 0                                                  | 0            | 0                     | 1    |
| <i>SEMA4D</i>    | 0                       | 0                                      | 0                                      | 0                                                  | 0            | 1                     | 0    |
| <i>SEMA5B</i>    | 0                       | 0                                      | 0                                      | 0                                                  | 1            | 1                     | 0    |
| <i>SEMA6D</i>    | 1                       | 0                                      | 0                                      | 0                                                  | 0            | 0                     | 0    |
| <i>SEMDJL1</i>   | 0                       | 0                                      | 0                                      | 0                                                  | 0            | 0                     | 1    |
| <i>SEMDJL2</i>   | 0                       | 0                                      | 0                                      | 0                                                  | 0            | 0                     | 1    |
| <i>SEMDK</i>     | 0                       | 0                                      | 0                                      | 0                                                  | 0            | 0                     | 1    |
| <i>SENP2</i>     | 0                       | 0                                      | 0                                      | 0                                                  | 0            | 1                     | 0    |
| <i>SENP3</i>     | 1                       | 0                                      | 1                                      | 0                                                  | 0            | 0                     | 0    |
| <i>SEPT1</i>     | 1                       | 0                                      | 0                                      | 0                                                  | 0            | 0                     | 0    |
| <i>SEPT14</i>    | 1                       | 0                                      | 0                                      | 0                                                  | 0            | 0                     | 0    |
| <i>SEPT4</i>     | 1                       | 0                                      | 0                                      | 0                                                  | 0            | 0                     | 0    |
| <i>SEPT5</i>     | 1                       | 0                                      | 0                                      | 0                                                  | 0            | 0                     | 0    |
| <i>SERINC1</i>   | 1                       | 0                                      | 0                                      | 0                                                  | 0            | 0                     | 0    |
| <i>SERPINA2</i>  | 0                       | 0                                      | 0                                      | 0                                                  | 0            | 1                     | 0    |
| <i>SERPINA4</i>  | 0                       | 0                                      | 0                                      | 0                                                  | 0            | 1                     | 0    |
| <i>SERPINA5</i>  | 1                       | 0                                      | 0                                      | 0                                                  | 0            | 1                     | 0    |
| <i>SERPINB1</i>  | 1                       | 0                                      | 0                                      | 0                                                  | 0            | 0                     | 0    |
| <i>SERPINB10</i> | 1                       | 0                                      | 0                                      | 0                                                  | 0            | 0                     | 0    |
| <i>SERPINB3</i>  | 1                       | 0                                      | 0                                      | 0                                                  | 0            | 0                     | 0    |
| <i>SERPINC1</i>  | 0                       | 0                                      | 0                                      | 0                                                  | 0            | 1                     | 0    |
| <i>SERPINE1</i>  | 1                       | 0                                      | 0                                      | 0                                                  | 0            | 1                     | 0    |
| <i>SERPINF2</i>  | 1                       | 0                                      | 0                                      | 0                                                  | 0            | 1                     | 0    |
| <i>SERTAD4</i>   | 1                       | 0                                      | 0                                      | 0                                                  | 0            | 0                     | 0    |
| <i>SESN3</i>     | 1                       | 0                                      | 0                                      | 0                                                  | 0            | 0                     | 0    |
| <i>SETD7</i>     | 1                       | 0                                      | 0                                      | 0                                                  | 0            | 0                     | 0    |
| <i>SF3B1</i>     | 1                       | 0                                      | 0                                      | 0                                                  | 0            | 0                     | 0    |
| <i>SFMBT1</i>    | 1                       | 0                                      | 0                                      | 0                                                  | 0            | 0                     | 0    |
| <i>SFRP5</i>     | 0                       | 0                                      | 0                                      | 0                                                  | 0            | 1                     | 0    |
| <i>SFXN2</i>     | 1                       | 0                                      | 0                                      | 0                                                  | 0            | 0                     | 0    |

| Gene            | Multi-omics integration | Gene-based result from AFGen 2017 GWAS | Gene-based result from AFGen 2018 GWAS | Meta-analysis of SNPs by two large AF GWAS in 2018 | GWAS catalog | Open Targets Platform | OMIM |
|-----------------|-------------------------|----------------------------------------|----------------------------------------|----------------------------------------------------|--------------|-----------------------|------|
| <i>SFXN4</i>    | 1                       | 0                                      | 0                                      | 0                                                  | 0            | 0                     | 0    |
| <i>SGCA</i>     | 0                       | 0                                      | 0                                      | 0                                                  | 0            | 1                     | 0    |
| <i>SGCG</i>     | 0                       | 0                                      | 0                                      | 1                                                  | 0            | 1                     | 0    |
| <i>SGMS1</i>    | 1                       | 0                                      | 0                                      | 0                                                  | 0            | 0                     | 0    |
| <i>SGOL1</i>    | 0                       | 0                                      | 0                                      | 0                                                  | 0            | 0                     | 1    |
| <i>SGPL1</i>    | 1                       | 0                                      | 0                                      | 0                                                  | 0            | 0                     | 0    |
| <i>SGS</i>      | 0                       | 0                                      | 0                                      | 0                                                  | 0            | 0                     | 1    |
| <i>SH2D3C</i>   | 1                       | 0                                      | 0                                      | 0                                                  | 0            | 0                     | 0    |
| <i>SH3BGR</i>   | 1                       | 0                                      | 0                                      | 0                                                  | 0            | 0                     | 0    |
| <i>SH3BP5</i>   | 0                       | 0                                      | 0                                      | 0                                                  | 0            | 1                     | 0    |
| <i>SH3PXD2</i>  | 1                       | 1                                      | 1                                      | 1                                                  | 1            | 1                     | 0    |
| <i>A</i>        |                         |                                        |                                        |                                                    |              |                       |      |
| <i>SHAPNS</i>   | 0                       | 0                                      | 0                                      | 0                                                  | 0            | 0                     | 1    |
| <i>SHBG</i>     | 1                       | 0                                      | 0                                      | 0                                                  | 0            | 1                     | 0    |
| <i>SHC1</i>     | 1                       | 1                                      | 1                                      | 0                                                  | 0            | 0                     | 0    |
| <i>SHC4</i>     | 1                       | 0                                      | 0                                      | 0                                                  | 0            | 0                     | 0    |
| <i>SHD</i>      | 0                       | 0                                      | 0                                      | 0                                                  | 0            | 1                     | 0    |
| <i>SHDRA</i>    | 0                       | 0                                      | 0                                      | 0                                                  | 0            | 0                     | 1    |
| <i>SHLD1</i>    | 0                       | 0                                      | 0                                      | 0                                                  | 0            | 1                     | 0    |
| <i>SHOX2</i>    | 0                       | 0                                      | 0                                      | 0                                                  | 0            | 1                     | 0    |
| <i>SHROOM</i>   | 1                       | 0                                      | 0                                      | 0                                                  | 0            | 0                     | 0    |
| <i>3</i>        |                         |                                        |                                        |                                                    |              |                       |      |
| <i>SIAH2</i>    | 1                       | 0                                      | 0                                      | 0                                                  | 0            | 0                     | 0    |
| <i>SIDT1</i>    | 1                       | 0                                      | 0                                      | 0                                                  | 0            | 0                     | 0    |
| <i>SIDT2</i>    | 1                       | 0                                      | 0                                      | 0                                                  | 0            | 0                     | 0    |
| <i>SIK1</i>     | 1                       | 0                                      | 0                                      | 0                                                  | 0            | 0                     | 0    |
| <i>SIK3</i>     | 1                       | 0                                      | 0                                      | 0                                                  | 1            | 1                     | 0    |
| <i>SIN3A</i>    | 1                       | 0                                      | 0                                      | 0                                                  | 0            | 0                     | 0    |
| <i>SIRT1</i>    | 1                       | 0                                      | 0                                      | 1                                                  | 1            | 1                     | 0    |
| <i>SIX4</i>     | 1                       | 0                                      | 0                                      | 0                                                  | 0            | 0                     | 0    |
| <i>SKAP2</i>    | 0                       | 0                                      | 0                                      | 0                                                  | 0            | 1                     | 0    |
| <i>SKS</i>      | 0                       | 0                                      | 0                                      | 0                                                  | 0            | 0                     | 1    |
| <i>SLC11A2</i>  | 1                       | 0                                      | 0                                      | 0                                                  | 0            | 0                     | 0    |
| <i>SLC12A2</i>  | 1                       | 0                                      | 0                                      | 0                                                  | 0            | 0                     | 0    |
| <i>SLC12A7</i>  | 1                       | 0                                      | 0                                      | 0                                                  | 0            | 0                     | 0    |
| <i>SLC12A8</i>  | 1                       | 0                                      | 0                                      | 0                                                  | 0            | 0                     | 0    |
| <i>SLC14A1</i>  | 1                       | 0                                      | 0                                      | 0                                                  | 0            | 0                     | 0    |
| <i>SLC16A1</i>  | 0                       | 0                                      | 0                                      | 0                                                  | 0            | 0                     | 1    |
| <i>SLC16A10</i> | 1                       | 0                                      | 0                                      | 0                                                  | 0            | 0                     | 0    |
| <i>SLC17A5</i>  | 1                       | 0                                      | 0                                      | 0                                                  | 0            | 1                     | 0    |
| <i>SLC18A2</i>  | 0                       | 0                                      | 0                                      | 0                                                  | 0            | 1                     | 0    |
| <i>SLC19A1</i>  | 0                       | 0                                      | 0                                      | 0                                                  | 0            | 1                     | 0    |
| <i>SLC19A2</i>  | 0                       | 0                                      | 0                                      | 0                                                  | 0            | 0                     | 1    |
| <i>SLC1A2</i>   | 1                       | 0                                      | 0                                      | 0                                                  | 0            | 0                     | 0    |

| Gene            | Multi-omics integration | Gene-based result from AFGen 2017 GWAS | Gene-based result from AFGen 2018 GWAS | Meta-analysis of SNPs by two large AF GWAS in 2018 | GWAS catalog | Open Targets Platform | OMIM |
|-----------------|-------------------------|----------------------------------------|----------------------------------------|----------------------------------------------------|--------------|-----------------------|------|
| <i>SLC1A4</i>   | 1                       | 0                                      | 1                                      | 0                                                  | 0            | 0                     | 0    |
| <i>SLC1A6</i>   | 1                       | 0                                      | 0                                      | 0                                                  | 0            | 0                     | 0    |
| <i>SLC22A12</i> | 1                       | 0                                      | 0                                      | 0                                                  | 0            | 0                     | 0    |
| <i>SLC22A14</i> | 1                       | 0                                      | 0                                      | 0                                                  | 0            | 0                     | 0    |
| <i>SLC22A17</i> | 0                       | 0                                      | 1                                      | 0                                                  | 0            | 0                     | 0    |
| <i>SLC22A23</i> | 0                       | 0                                      | 0                                      | 0                                                  | 0            | 1                     | 0    |
| <i>SLC22A25</i> | 0                       | 0                                      | 0                                      | 0                                                  | 0            | 1                     | 0    |
| <i>SLC22A4</i>  | 0                       | 0                                      | 0                                      | 0                                                  | 0            | 1                     | 0    |
| <i>SLC24A2</i>  | 0                       | 0                                      | 0                                      | 0                                                  | 1            | 0                     | 0    |
| <i>SLC25A10</i> | 0                       | 0                                      | 0                                      | 0                                                  | 0            | 1                     | 0    |
| <i>SLC25A15</i> | 1                       | 0                                      | 0                                      | 0                                                  | 0            | 0                     | 0    |
| <i>SLC25A26</i> | 0                       | 0                                      | 0                                      | 0                                                  | 1            | 1                     | 0    |
| <i>SLC25A34</i> | 1                       | 0                                      | 0                                      | 0                                                  | 0            | 0                     | 0    |
| <i>SLC25A36</i> | 0                       | 0                                      | 0                                      | 0                                                  | 0            | 1                     | 0    |
| <i>SLC25A37</i> | 1                       | 0                                      | 0                                      | 0                                                  | 0            | 0                     | 0    |
| <i>SLC26A1</i>  | 1                       | 0                                      | 0                                      | 0                                                  | 0            | 0                     | 0    |
| <i>SLC26A4</i>  | 1                       | 0                                      | 0                                      | 0                                                  | 0            | 0                     | 0    |
| <i>SLC27A3</i>  | 1                       | 0                                      | 0                                      | 0                                                  | 0            | 0                     | 0    |
| <i>SLC27A6</i>  | 1                       | 0                                      | 0                                      | 1                                                  | 0            | 1                     | 0    |
| <i>SLC29A4</i>  | 1                       | 0                                      | 0                                      | 0                                                  | 0            | 0                     | 0    |
| <i>SLC2A11</i>  | 1                       | 0                                      | 0                                      | 0                                                  | 0            | 0                     | 1    |
| <i>SLC2A2</i>   | 0                       | 0                                      | 0                                      | 0                                                  | 0            | 1                     | 0    |
| <i>SLC2A4</i>   | 1                       | 0                                      | 0                                      | 0                                                  | 0            | 0                     | 1    |
| <i>SLC30A1</i>  | 0                       | 0                                      | 0                                      | 0                                                  | 0            | 1                     | 0    |
| <i>SLC30A3</i>  | 0                       | 0                                      | 0                                      | 0                                                  | 1            | 1                     | 0    |
| <i>SLC30A5</i>  | 0                       | 0                                      | 0                                      | 0                                                  | 0            | 1                     | 0    |
| <i>SLC33A1</i>  | 0                       | 0                                      | 0                                      | 0                                                  | 0            | 1                     | 0    |
| <i>SLC35A4</i>  | 1                       | 0                                      | 0                                      | 0                                                  | 0            | 0                     | 0    |
| <i>SLC35D2</i>  | 1                       | 0                                      | 0                                      | 0                                                  | 0            | 0                     | 0    |
| <i>SLC35F1</i>  | 0                       | 0                                      | 0                                      | 1                                                  | 1            | 1                     | 0    |
| <i>SLC41A1</i>  | 1                       | 0                                      | 0                                      | 0                                                  | 0            | 0                     | 0    |
| <i>SLC44A4</i>  | 1                       | 0                                      | 0                                      | 0                                                  | 0            | 0                     | 0    |
| <i>SLC44A5</i>  | 1                       | 0                                      | 0                                      | 0                                                  | 0            | 0                     | 0    |
| <i>SLC45A1</i>  | 0                       | 0                                      | 0                                      | 0                                                  | 0            | 1                     | 0    |
| <i>SLC45A3</i>  | 1                       | 0                                      | 0                                      | 0                                                  | 0            | 0                     | 0    |
| <i>SLC48A1</i>  | 1                       | 0                                      | 0                                      | 0                                                  | 0            | 0                     | 0    |
| <i>SLC4A1</i>   | 1                       | 0                                      | 0                                      | 0                                                  | 0            | 0                     | 0    |
| <i>SLC4A10</i>  | 1                       | 0                                      | 0                                      | 0                                                  | 0            | 0                     | 0    |
| <i>SLC4A3</i>   | 0                       | 0                                      | 0                                      | 0                                                  | 0            | 1                     | 0    |
| <i>SLC4A4</i>   | 1                       | 0                                      | 0                                      | 0                                                  | 0            | 0                     | 0    |
| <i>SLC4A7</i>   | 1                       | 0                                      | 0                                      | 0                                                  | 0            | 1                     | 0    |
| <i>SLC4A9</i>   | 1                       | 0                                      | 0                                      | 0                                                  | 0            | 0                     | 0    |
| <i>SLC6A1</i>   | 0                       | 0                                      | 0                                      | 0                                                  | 0            | 1                     | 0    |
| <i>SLC7A10</i>  | 1                       | 0                                      | 0                                      | 0                                                  | 0            | 0                     | 0    |

| Gene             | Multi-omics integration | Gene-based result from AFGen 2017 GWAS | Gene-based result from AFGen 2018 GWAS | Meta-analysis of SNPs by two large AF GWAS in 2018 | GWAS catalog | Open Targets Platform | OMIM |
|------------------|-------------------------|----------------------------------------|----------------------------------------|----------------------------------------------------|--------------|-----------------------|------|
| <i>SLC7A11</i>   | 0                       | 0                                      | 0                                      | 0                                                  | 0            | 1                     | 0    |
| <i>SLC8A1</i>    | 0                       | 0                                      | 0                                      | 0                                                  | 0            | 0                     | 1    |
| <i>SLC9A1</i>    | 0                       | 0                                      | 0                                      | 0                                                  | 0            | 1                     | 0    |
| <i>SLC9A3R2</i>  | 1                       | 0                                      | 0                                      | 0                                                  | 0            | 0                     | 0    |
| <i>SLC9B1</i>    | 0                       | 0                                      | 0                                      | 1                                                  | 1            | 1                     | 0    |
| <i>SLCO1B1</i>   | 0                       | 0                                      | 0                                      | 0                                                  | 0            | 1                     | 0    |
| <i>SLCO1B3</i>   | 0                       | 0                                      | 0                                      | 0                                                  | 0            | 1                     | 0    |
| <i>SLCO4A1</i>   | 0                       | 0                                      | 0                                      | 0                                                  | 0            | 1                     | 0    |
| <i>SLFN1</i>     | 1                       | 0                                      | 0                                      | 0                                                  | 0            | 0                     | 0    |
| <i>SLIT3</i>     | 1                       | 0                                      | 0                                      | 1                                                  | 1            | 0                     | 0    |
| <i>SLK</i>       | 1                       | 0                                      | 0                                      | 0                                                  | 0            | 0                     | 0    |
| <i>SLMAP</i>     | 1                       | 0                                      | 0                                      | 0                                                  | 0            | 0                     | 0    |
| <i>SLN</i>       | 0                       | 0                                      | 0                                      | 0                                                  | 0            | 1                     | 0    |
| <i>SLOS</i>      | 0                       | 0                                      | 0                                      | 0                                                  | 0            | 0                     | 1    |
| <i>SLURP1</i>    | 0                       | 0                                      | 0                                      | 0                                                  | 0            | 1                     | 0    |
| <i>SMA1</i>      | 0                       | 0                                      | 0                                      | 0                                                  | 0            | 0                     | 1    |
| <i>SMA2</i>      | 0                       | 0                                      | 0                                      | 0                                                  | 0            | 0                     | 1    |
| <i>SMA3</i>      | 0                       | 0                                      | 0                                      | 0                                                  | 0            | 0                     | 1    |
| <i>SMABF1</i>    | 0                       | 0                                      | 0                                      | 0                                                  | 0            | 0                     | 1    |
| <i>SMAD1</i>     | 0                       | 0                                      | 0                                      | 0                                                  | 0            | 1                     | 0    |
| <i>SMAD2</i>     | 0                       | 0                                      | 0                                      | 0                                                  | 0            | 1                     | 1    |
| <i>SMAD3</i>     | 1                       | 0                                      | 0                                      | 0                                                  | 0            | 1                     | 0    |
| <i>SMAD4</i>     | 0                       | 0                                      | 0                                      | 0                                                  | 1            | 0                     | 0    |
| <i>SMAD6</i>     | 1                       | 0                                      | 0                                      | 0                                                  | 0            | 0                     | 0    |
| <i>SMAD7</i>     | 1                       | 0                                      | 0                                      | 1                                                  | 1            | 1                     | 0    |
| <i>SMARCA5</i>   | 1                       | 0                                      | 0                                      | 0                                                  | 0            | 0                     | 0    |
| <i>SMARCA D1</i> | 1                       | 0                                      | 0                                      | 0                                                  | 0            | 0                     | 0    |
| <i>SMARCB1</i>   | 1                       | 0                                      | 0                                      | 0                                                  | 0            | 0                     | 0    |
| <i>SMAX1</i>     | 0                       | 0                                      | 0                                      | 0                                                  | 0            | 0                     | 1    |
| <i>SMC3</i>      | 1                       | 0                                      | 0                                      | 0                                                  | 0            | 0                     | 0    |
| <i>SMC5</i>      | 1                       | 0                                      | 0                                      | 0                                                  | 0            | 0                     | 0    |
| <i>SMDMD M</i>   | 0                       | 0                                      | 0                                      | 0                                                  | 0            | 0                     | 1    |
| <i>SMDP3</i>     | 0                       | 0                                      | 0                                      | 0                                                  | 0            | 0                     | 1    |
| <i>SMDS</i>      | 0                       | 0                                      | 0                                      | 0                                                  | 0            | 0                     | 1    |
| <i>SMG5</i>      | 1                       | 0                                      | 0                                      | 0                                                  | 0            | 0                     | 0    |
| <i>SMG6</i>      | 1                       | 0                                      | 0                                      | 0                                                  | 0            | 0                     | 0    |
| <i>SMG7</i>      | 1                       | 0                                      | 0                                      | 0                                                  | 0            | 0                     | 0    |
| <i>SMIM29</i>    | 0                       | 0                                      | 0                                      | 0                                                  | 0            | 1                     | 0    |
| <i>SMOX</i>      | 1                       | 0                                      | 0                                      | 0                                                  | 0            | 0                     | 0    |
| <i>SMPD2</i>     | 1                       | 0                                      | 0                                      | 0                                                  | 0            | 0                     | 0    |
| <i>SMPDL3A</i>   | 1                       | 0                                      | 0                                      | 0                                                  | 0            | 0                     | 0    |



| Gene           | Multi-omics integration | Gene-based result from AFGen 2017 GWAS | Gene-based result from AFGen 2018 GWAS | Meta-analysis of SNPs by two large AF GWAS in 2018 | GWAS catalog | Open Targets Platform | OMIM |
|----------------|-------------------------|----------------------------------------|----------------------------------------|----------------------------------------------------|--------------|-----------------------|------|
| <i>SMTN</i>    | 1                       | 0                                      | 0                                      | 0                                                  | 0            | 0                     | 0    |
| <i>SMTNL2</i>  | 1                       | 0                                      | 0                                      | 0                                                  | 0            | 0                     | 0    |
| <i>SNAP25</i>  | 0                       | 0                                      | 0                                      | 0                                                  | 0            | 1                     | 0    |
| <i>SNAPIN</i>  | 1                       | 0                                      | 0                                      | 0                                                  | 0            | 0                     | 0    |
| <i>SND1</i>    | 1                       | 0                                      | 0                                      | 0                                                  | 0            | 0                     | 0    |
| <i>SNRNP27</i> | 1                       | 1                                      | 1                                      | 0                                                  | 1            | 1                     | 0    |
| <i>SNRPB</i>   | 0                       | 0                                      | 0                                      | 0                                                  | 0            | 0                     | 1    |
| <i>SNTA1</i>   | 0                       | 0                                      | 0                                      | 0                                                  | 0            | 1                     | 0    |
| <i>SNTB1</i>   | 0                       | 0                                      | 0                                      | 0                                                  | 0            | 1                     | 0    |
| <i>SNTB2</i>   | 1                       | 0                                      | 0                                      | 0                                                  | 0            | 0                     | 0    |
| <i>SNTG1</i>   | 1                       | 0                                      | 0                                      | 0                                                  | 0            | 0                     | 0    |
| <i>SNX19</i>   | 1                       | 0                                      | 0                                      | 0                                                  | 0            | 0                     | 0    |
| <i>SNX22</i>   | 1                       | 0                                      | 0                                      | 0                                                  | 0            | 0                     | 0    |
| <i>SNX27</i>   | 1                       | 0                                      | 0                                      | 0                                                  | 0            | 0                     | 0    |
| <i>SNX33</i>   | 1                       | 0                                      | 0                                      | 0                                                  | 0            | 0                     | 0    |
| <i>SOAT1</i>   | 0                       | 0                                      | 0                                      | 0                                                  | 0            | 1                     | 0    |
| <i>SOCS1</i>   | 1                       | 0                                      | 0                                      | 0                                                  | 0            | 0                     | 0    |
| <i>SOCS2</i>   | 1                       | 0                                      | 0                                      | 0                                                  | 0            | 0                     | 0    |
| <i>SOCS3</i>   | 1                       | 0                                      | 0                                      | 0                                                  | 0            | 0                     | 0    |
| <i>SOD1</i>    | 0                       | 0                                      | 0                                      | 0                                                  | 0            | 1                     | 0    |
| <i>SORBS2</i>  | 0                       | 0                                      | 0                                      | 0                                                  | 0            | 1                     | 0    |
| <i>SORL1</i>   | 0                       | 0                                      | 0                                      | 1                                                  | 1            | 1                     | 0    |
| <i>SOS</i>     | 0                       | 0                                      | 0                                      | 0                                                  | 0            | 0                     | 1    |
| <i>SOS1</i>    | 0                       | 0                                      | 0                                      | 0                                                  | 0            | 0                     | 1    |
| <i>SOTOS1</i>  | 0                       | 0                                      | 0                                      | 0                                                  | 0            | 0                     | 1    |
| <i>SOX1</i>    | 1                       | 0                                      | 0                                      | 0                                                  | 0            | 0                     | 0    |
| <i>SOX15</i>   | 1                       | 0                                      | 1                                      | 0                                                  | 0            | 0                     | 0    |
| <i>SOX5</i>    | 1                       | 0                                      | 1                                      | 1                                                  | 1            | 1                     | 0    |
| <i>SP4</i>     | 0                       | 0                                      | 0                                      | 0                                                  | 0            | 1                     | 0    |
| <i>SP8</i>     | 1                       | 0                                      | 0                                      | 0                                                  | 0            | 0                     | 0    |
| <i>SP9</i>     | 1                       | 0                                      | 0                                      | 0                                                  | 0            | 0                     | 0    |
| <i>SPAG4</i>   | 1                       | 0                                      | 0                                      | 0                                                  | 0            | 0                     | 0    |
| <i>SPARC</i>   | 1                       | 0                                      | 0                                      | 0                                                  | 0            | 0                     | 0    |
| <i>SPAST</i>   | 1                       | 0                                      | 0                                      | 0                                                  | 0            | 0                     | 0    |
| <i>SPATA16</i> | 1                       | 0                                      | 0                                      | 0                                                  | 0            | 0                     | 0    |
| <i>SPATA17</i> | 1                       | 0                                      | 0                                      | 0                                                  | 0            | 0                     | 0    |
| <i>SPATA5</i>  | 1                       | 0                                      | 0                                      | 0                                                  | 0            | 1                     | 0    |
| <i>SPATC1L</i> | 0                       | 0                                      | 0                                      | 0                                                  | 0            | 1                     | 0    |
| <i>SPATS2L</i> | 0                       | 0                                      | 1                                      | 1                                                  | 1            | 1                     | 0    |
| <i>SPEM1</i>   | 0                       | 0                                      | 1                                      | 0                                                  | 0            | 0                     | 0    |
| <i>SPEN</i>    | 1                       | 0                                      | 0                                      | 0                                                  | 0            | 0                     | 0    |
| <i>SPHK1</i>   | 1                       | 0                                      | 0                                      | 0                                                  | 0            | 0                     | 0    |
| <i>SPNS1</i>   | 1                       | 0                                      | 0                                      | 0                                                  | 0            | 0                     | 0    |
| <i>SPOCK1</i>  | 1                       | 0                                      | 1                                      | 0                                                  | 0            | 0                     | 0    |

| Gene            | Multi-omics integration | Gene-based result from AFGen 2017 GWAS | Gene-based result from AFGen 2018 GWAS | Meta-analysis of SNPs by two large AF GWAS in 2018 | GWAS catalog | Open Targets Platform | OMIM |
|-----------------|-------------------------|----------------------------------------|----------------------------------------|----------------------------------------------------|--------------|-----------------------|------|
| <i>SPON1</i>    | 1                       | 0                                      | 0                                      | 0                                                  | 0            | 0                     | 0    |
| <i>SPON2</i>    | 1                       | 0                                      | 0                                      | 0                                                  | 0            | 0                     | 0    |
| <i>SPP1</i>     | 0                       | 0                                      | 0                                      | 0                                                  | 0            | 1                     | 0    |
| <i>SPPL2A</i>   | 0                       | 0                                      | 0                                      | 0                                                  | 0            | 1                     | 0    |
| <i>SPRED2</i>   | 1                       | 0                                      | 0                                      | 0                                                  | 0            | 0                     | 0    |
| <i>SPRY1</i>    | 1                       | 0                                      | 0                                      | 0                                                  | 0            | 0                     | 0    |
| <i>SPSB3</i>    | 1                       | 0                                      | 0                                      | 0                                                  | 0            | 0                     | 0    |
| <i>SPTB</i>     | 1                       | 0                                      | 0                                      | 0                                                  | 0            | 0                     | 0    |
| <i>SPTBN2</i>   | 1                       | 0                                      | 0                                      | 0                                                  | 0            | 0                     | 0    |
| <i>SPTBN5</i>   | 1                       | 0                                      | 0                                      | 0                                                  | 0            | 0                     | 0    |
| <i>SQT1</i>     | 0                       | 0                                      | 0                                      | 0                                                  | 0            | 0                     | 1    |
| <i>SQT2</i>     | 0                       | 0                                      | 0                                      | 0                                                  | 0            | 0                     | 1    |
| <i>SQT3</i>     | 0                       | 0                                      | 0                                      | 0                                                  | 0            | 0                     | 1    |
| <i>SRF</i>      | 0                       | 0                                      | 0                                      | 0                                                  | 0            | 0                     | 1    |
| <i>SRFBP1</i>   | 0                       | 0                                      | 0                                      | 0                                                  | 0            | 0                     | 1    |
| <i>SRGAP1</i>   | 1                       | 0                                      | 0                                      | 0                                                  | 0            | 0                     | 0    |
| <i>SRI</i>      | 0                       | 0                                      | 0                                      | 0                                                  | 0            | 1                     | 0    |
| <i>SRL</i>      | 1                       | 0                                      | 0                                      | 0                                                  | 0            | 0                     | 0    |
| <i>SRM</i>      | 0                       | 0                                      | 0                                      | 0                                                  | 0            | 1                     | 0    |
| <i>SRR</i>      | 1                       | 0                                      | 0                                      | 0                                                  | 0            | 0                     | 0    |
| <i>SRSF10P1</i> | 0                       | 0                                      | 0                                      | 0                                                  | 1            | 0                     | 0    |
| <i>SRTD14</i>   | 0                       | 0                                      | 0                                      | 0                                                  | 0            | 0                     | 1    |
| <i>SRTD6</i>    | 0                       | 0                                      | 0                                      | 0                                                  | 0            | 0                     | 1    |
| <i>SSPN</i>     | 1                       | 0                                      | 0                                      | 1                                                  | 1            | 1                     | 0    |
| <i>SSR2</i>     | 1                       | 0                                      | 0                                      | 0                                                  | 0            | 0                     | 0    |
| <i>SSS1</i>     | 0                       | 0                                      | 0                                      | 0                                                  | 0            | 0                     | 1    |
| <i>SSS2</i>     | 0                       | 0                                      | 0                                      | 0                                                  | 0            | 0                     | 1    |
| <i>SST</i>      | 0                       | 0                                      | 0                                      | 0                                                  | 0            | 1                     | 0    |
| <i>ST13</i>     | 0                       | 0                                      | 0                                      | 0                                                  | 0            | 1                     | 0    |
| <i>ST3GAL4</i>  | 0                       | 0                                      | 0                                      | 0                                                  | 0            | 1                     | 0    |
| <i>ST8SIA4</i>  | 0                       | 0                                      | 0                                      | 0                                                  | 0            | 1                     | 0    |
| <i>STAC2</i>    | 1                       | 0                                      | 0                                      | 0                                                  | 0            | 0                     | 0    |
| <i>STAG1</i>    | 1                       | 0                                      | 0                                      | 0                                                  | 0            | 0                     | 0    |
| <i>STAP2</i>    | 0                       | 0                                      | 0                                      | 0                                                  | 0            | 1                     | 0    |
| <i>STARD3</i>   | 1                       | 0                                      | 0                                      | 0                                                  | 0            | 0                     | 0    |
| <i>STAT1</i>    | 0                       | 0                                      | 0                                      | 0                                                  | 0            | 1                     | 0    |
| <i>STAT2</i>    | 1                       | 0                                      | 0                                      | 0                                                  | 0            | 0                     | 0    |
| <i>STAT3</i>    | 0                       | 0                                      | 0                                      | 0                                                  | 0            | 1                     | 0    |
| <i>STAT5A</i>   | 1                       | 0                                      | 0                                      | 0                                                  | 0            | 0                     | 0    |
| <i>STH</i>      | 1                       | 0                                      | 0                                      | 0                                                  | 0            | 0                     | 0    |
| <i>STIM1</i>    | 1                       | 0                                      | 0                                      | 0                                                  | 0            | 0                     | 0    |
| <i>STK11</i>    | 1                       | 0                                      | 0                                      | 0                                                  | 0            | 1                     | 0    |
| <i>STK16</i>    | 1                       | 0                                      | 0                                      | 0                                                  | 0            | 0                     | 0    |
| <i>STK19</i>    | 1                       | 0                                      | 0                                      | 0                                                  | 0            | 0                     | 0    |

| Gene            | Multi-omics integration | Gene-based result from AFGen 2017 GWAS | Gene-based result from AFGen 2018 GWAS | Meta-analysis of SNPs by two large AF GWAS in 2018 | GWAS catalog | Open Targets Platform | OMIM |
|-----------------|-------------------------|----------------------------------------|----------------------------------------|----------------------------------------------------|--------------|-----------------------|------|
| <i>STOM</i>     | 1                       | 0                                      | 0                                      | 0                                                  | 0            | 0                     | 0    |
| <i>STOX1</i>    | 1                       | 0                                      | 0                                      | 0                                                  | 0            | 0                     | 0    |
| <i>STRA6</i>    | 0                       | 0                                      | 0                                      | 0                                                  | 0            | 0                     | 1    |
| <i>STS</i>      | 0                       | 0                                      | 0                                      | 0                                                  | 0            | 1                     | 0    |
| <i>STUB1</i>    | 1                       | 0                                      | 0                                      | 0                                                  | 0            | 0                     | 0    |
| <i>STX17</i>    | 1                       | 0                                      | 0                                      | 0                                                  | 0            | 0                     | 0    |
| <i>STX19</i>    | 1                       | 0                                      | 0                                      | 0                                                  | 0            | 0                     | 0    |
| <i>STXBP4</i>   | 1                       | 0                                      | 0                                      | 0                                                  | 0            | 0                     | 0    |
| <i>STYX</i>     | 1                       | 0                                      | 0                                      | 0                                                  | 0            | 0                     | 0    |
| <i>SUFU</i>     | 1                       | 0                                      | 0                                      | 0                                                  | 0            | 0                     | 0    |
| <i>SUGP1</i>    | 0                       | 0                                      | 0                                      | 0                                                  | 1            | 1                     | 0    |
| <i>SULF2</i>    | 0                       | 0                                      | 0                                      | 0                                                  | 0            | 1                     | 0    |
| <i>SULT1E1</i>  | 0                       | 0                                      | 0                                      | 0                                                  | 0            | 1                     | 0    |
| <i>SUMF2</i>    | 1                       | 0                                      | 0                                      | 0                                                  | 0            | 0                     | 0    |
| <i>SUN1</i>     | 0                       | 0                                      | 0                                      | 1                                                  | 1            | 1                     | 0    |
| <i>SV2A</i>     | 1                       | 0                                      | 0                                      | 0                                                  | 0            | 0                     | 0    |
| <i>SYK</i>      | 0                       | 0                                      | 0                                      | 0                                                  | 1            | 1                     | 0    |
| <i>SYMPK</i>    | 1                       | 0                                      | 0                                      | 0                                                  | 0            | 0                     | 0    |
| <i>SYNE1</i>    | 0                       | 0                                      | 0                                      | 0                                                  | 0            | 1                     | 0    |
| <i>SYNE2</i>    | 0                       | 0                                      | 1                                      | 1                                                  | 1            | 1                     | 0    |
| <i>SYNGR1</i>   | 1                       | 0                                      | 0                                      | 0                                                  | 0            | 0                     | 0    |
| <i>SYNGR2</i>   | 1                       | 0                                      | 0                                      | 0                                                  | 0            | 0                     | 0    |
| <i>SYNGR3</i>   | 1                       | 0                                      | 0                                      | 0                                                  | 0            | 0                     | 0    |
| <i>SYNGR4</i>   | 1                       | 0                                      | 0                                      | 0                                                  | 0            | 0                     | 0    |
| <i>SYNPO2L</i>  | 1                       | 0                                      | 1                                      | 1                                                  | 1            | 1                     | 0    |
| <i>SYT12</i>    | 1                       | 0                                      | 0                                      | 0                                                  | 0            | 0                     | 0    |
| <i>TAB2</i>     | 0                       | 0                                      | 0                                      | 0                                                  | 0            | 0                     | 1    |
| <i>TAC1</i>     | 0                       | 0                                      | 0                                      | 0                                                  | 0            | 1                     | 0    |
| <i>TAF11</i>    | 1                       | 0                                      | 0                                      | 0                                                  | 0            | 0                     | 0    |
| <i>TAF5</i>     | 1                       | 0                                      | 0                                      | 0                                                  | 0            | 0                     | 0    |
| <i>TAGLN3</i>   | 1                       | 0                                      | 1                                      | 0                                                  | 0            | 0                     | 0    |
| <i>TAPVR1</i>   | 0                       | 0                                      | 0                                      | 0                                                  | 0            | 0                     | 1    |
| <i>TAR</i>      | 0                       | 0                                      | 0                                      | 0                                                  | 0            | 0                     | 1    |
| <i>TARPS</i>    | 0                       | 0                                      | 0                                      | 0                                                  | 0            | 0                     | 1    |
| <i>TARS2</i>    | 1                       | 0                                      | 0                                      | 0                                                  | 0            | 0                     | 0    |
| <i>TBC1D10A</i> | 1                       | 0                                      | 0                                      | 0                                                  | 0            | 0                     | 0    |
| <i>TBC1D10B</i> | 1                       | 0                                      | 0                                      | 0                                                  | 0            | 0                     | 0    |
| <i>TBC1D24</i>  | 1                       | 0                                      | 0                                      | 0                                                  | 0            | 0                     | 0    |
| <i>TBC1D32</i>  | 0                       | 0                                      | 0                                      | 0                                                  | 0            | 0                     | 1    |
| <i>TBCB</i>     | 1                       | 0                                      | 0                                      | 0                                                  | 0            | 0                     | 0    |
| <i>TBHS</i>     | 0                       | 0                                      | 0                                      | 0                                                  | 0            | 0                     | 1    |
| <i>TBL3</i>     | 1                       | 0                                      | 1                                      | 0                                                  | 0            | 0                     | 0    |

| Gene           | Multi-omics integration | Gene-based result from AFGen 2017 GWAS | Gene-based result from AFGen 2018 GWAS | Meta-analysis of SNPs by two large AF GWAS in 2018 | GWAS catalog | Open Targets Platform | OMIM |
|----------------|-------------------------|----------------------------------------|----------------------------------------|----------------------------------------------------|--------------|-----------------------|------|
| <i>TBP</i>     | 0                       | 0                                      | 0                                      | 0                                                  | 0            | 1                     | 0    |
| <i>TBPL1</i>   | 1                       | 0                                      | 0                                      | 0                                                  | 0            | 0                     | 0    |
| <i>TBRS</i>    | 0                       | 0                                      | 0                                      | 0                                                  | 0            | 0                     | 1    |
| <i>TBX1</i>    | 0                       | 0                                      | 0                                      | 0                                                  | 0            | 0                     | 1    |
| <i>TBX18</i>   | 0                       | 0                                      | 0                                      | 0                                                  | 0            | 0                     | 1    |
| <i>TBX20</i>   | 1                       | 0                                      | 0                                      | 0                                                  | 0            | 0                     | 1    |
| <i>TBX3</i>    | 1                       | 0                                      | 0                                      | 0                                                  | 1            | 1                     | 1    |
| <i>TBX5</i>    | 1                       | 1                                      | 1                                      | 1                                                  | 1            | 1                     | 1    |
| <i>TBX6</i>    | 0                       | 0                                      | 0                                      | 0                                                  | 0            | 0                     | 1    |
| <i>TCAP</i>    | 1                       | 0                                      | 0                                      | 0                                                  | 0            | 0                     | 0    |
| <i>TCEA3</i>   | 1                       | 0                                      | 0                                      | 0                                                  | 0            | 0                     | 0    |
| <i>TCF19</i>   | 1                       | 0                                      | 0                                      | 0                                                  | 0            | 0                     | 0    |
| <i>TCF21</i>   | 1                       | 0                                      | 0                                      | 0                                                  | 0            | 0                     | 0    |
| <i>TCF7L2</i>  | 0                       | 0                                      | 0                                      | 0                                                  | 1            | 1                     | 0    |
| <i>TCFL5</i>   | 0                       | 0                                      | 0                                      | 0                                                  | 0            | 1                     | 0    |
| <i>TCHHL1</i>  | 0                       | 0                                      | 0                                      | 0                                                  | 0            | 1                     | 0    |
| <i>TCN1</i>    | 1                       | 0                                      | 0                                      | 0                                                  | 0            | 0                     | 0    |
| <i>TCPI</i>    | 0                       | 0                                      | 0                                      | 0                                                  | 0            | 1                     | 0    |
| <i>TCP11L2</i> | 1                       | 0                                      | 0                                      | 0                                                  | 0            | 0                     | 0    |
| <i>TDRD1</i>   | 1                       | 0                                      | 0                                      | 0                                                  | 0            | 0                     | 0    |
| <i>TDRD10</i>  | 1                       | 0                                      | 0                                      | 0                                                  | 0            | 0                     | 0    |
| <i>TDRD15</i>  | 0                       | 0                                      | 0                                      | 0                                                  | 1            | 1                     | 0    |
| <i>TDRD7</i>   | 1                       | 0                                      | 0                                      | 0                                                  | 0            | 0                     | 0    |
| <i>TDRKH</i>   | 1                       | 0                                      | 0                                      | 0                                                  | 0            | 0                     | 0    |
| <i>TEAD1</i>   | 1                       | 0                                      | 0                                      | 0                                                  | 0            | 0                     | 0    |
| <i>TEAD3</i>   | 1                       | 0                                      | 0                                      | 0                                                  | 0            | 0                     | 0    |
| <i>TEAD4</i>   | 0                       | 0                                      | 0                                      | 0                                                  | 1            | 0                     | 0    |
| <i>TEMTYS</i>  | 0                       | 0                                      | 0                                      | 0                                                  | 0            | 0                     | 1    |
| <i>TERF2</i>   | 1                       | 0                                      | 0                                      | 0                                                  | 0            | 0                     | 0    |
| <i>TES</i>     | 1                       | 0                                      | 0                                      | 0                                                  | 0            | 0                     | 0    |
| <i>TET1</i>    | 0                       | 0                                      | 0                                      | 0                                                  | 0            | 1                     | 0    |
| <i>TEX12</i>   | 1                       | 0                                      | 0                                      | 0                                                  | 0            | 0                     | 0    |
| <i>TEX41</i>   | 0                       | 0                                      | 0                                      | 1                                                  | 1            | 0                     | 0    |
| <i>TFAP2A</i>  | 0                       | 0                                      | 0                                      | 0                                                  | 0            | 0                     | 1    |
| <i>TFAP2C</i>  | 1                       | 0                                      | 0                                      | 0                                                  | 0            | 0                     | 0    |
| <i>TFAP4</i>   | 1                       | 0                                      | 0                                      | 0                                                  | 0            | 0                     | 0    |
| <i>TFDP1</i>   | 1                       | 0                                      | 0                                      | 0                                                  | 0            | 0                     | 0    |
| <i>TFEC</i>    | 1                       | 0                                      | 0                                      | 0                                                  | 0            | 0                     | 0    |
| <i>TFPI</i>    | 0                       | 0                                      | 0                                      | 0                                                  | 0            | 1                     | 0    |
| <i>TFRC</i>    | 0                       | 0                                      | 0                                      | 0                                                  | 0            | 1                     | 0    |
| <i>TG</i>      | 0                       | 0                                      | 0                                      | 0                                                  | 0            | 1                     | 0    |
| <i>TGFB1</i>   | 1                       | 0                                      | 0                                      | 0                                                  | 0            | 1                     | 0    |
| <i>TGFB3</i>   | 0                       | 0                                      | 0                                      | 0                                                  | 0            | 0                     | 1    |
| <i>TGFBR1</i>  | 1                       | 0                                      | 0                                      | 0                                                  | 0            | 0                     | 1    |

| Gene            | Multi-omics integration | Gene-based result from AFGen 2017 GWAS | Gene-based result from AFGen 2018 GWAS | Meta-analysis of SNPs by two large AF GWAS in 2018 | GWAS catalog | Open Targets Platform | OMIM |
|-----------------|-------------------------|----------------------------------------|----------------------------------------|----------------------------------------------------|--------------|-----------------------|------|
| <i>TGFBR2</i>   | 0                       | 0                                      | 0                                      | 0                                                  | 0            | 1                     | 0    |
| <i>TGFBRAP1</i> | 1                       | 0                                      | 0                                      | 0                                                  | 0            | 0                     | 0    |
| <i>TGM2</i>     | 1                       | 0                                      | 0                                      | 0                                                  | 0            | 0                     | 0    |
| <i>TH</i>       | 0                       | 0                                      | 0                                      | 0                                                  | 0            | 1                     | 0    |
| <i>THAP10</i>   | 1                       | 0                                      | 0                                      | 0                                                  | 0            | 0                     | 0    |
| <i>THAP3</i>    | 1                       | 0                                      | 0                                      | 0                                                  | 0            | 0                     | 0    |
| <i>THAP8</i>    | 1                       | 0                                      | 0                                      | 0                                                  | 0            | 0                     | 0    |
| <i>THAP9</i>    | 1                       | 1                                      | 1                                      | 0                                                  | 0            | 0                     | 0    |
| <i>THBD</i>     | 0                       | 0                                      | 0                                      | 0                                                  | 0            | 1                     | 0    |
| <i>THBS3</i>    | 1                       | 0                                      | 0                                      | 0                                                  | 0            | 0                     | 0    |
| <i>THEMIS3P</i> | 0                       | 0                                      | 0                                      | 0                                                  | 1            | 0                     | 0    |
| <i>THRA</i>     | 1                       | 1                                      | 0                                      | 0                                                  | 0            | 1                     | 0    |
| <i>THRB</i>     | 1                       | 0                                      | 0                                      | 1                                                  | 1            | 1                     | 1    |
| <i>THYN1</i>    | 1                       | 0                                      | 0                                      | 0                                                  | 0            | 0                     | 0    |
| <i>TIA1</i>     | 0                       | 0                                      | 0                                      | 0                                                  | 0            | 1                     | 0    |
| <i>TIAC</i>     | 0                       | 0                                      | 0                                      | 0                                                  | 0            | 0                     | 1    |
| <i>TIMM50</i>   | 1                       | 0                                      | 0                                      | 0                                                  | 0            | 0                     | 0    |
| <i>TIMP1</i>    | 0                       | 0                                      | 0                                      | 0                                                  | 0            | 1                     | 0    |
| <i>TIMP2</i>    | 0                       | 0                                      | 0                                      | 0                                                  | 0            | 1                     | 0    |
| <i>TIMP3</i>    | 0                       | 0                                      | 0                                      | 0                                                  | 0            | 1                     | 0    |
| <i>TIMP4</i>    | 0                       | 0                                      | 0                                      | 0                                                  | 0            | 1                     | 0    |
| <i>TIPARP</i>   | 1                       | 0                                      | 0                                      | 0                                                  | 0            | 0                     | 0    |
| <i>TJP2</i>     | 1                       | 0                                      | 0                                      | 0                                                  | 0            | 0                     | 0    |
| <i>TK2</i>      | 0                       | 0                                      | 0                                      | 0                                                  | 0            | 0                     | 1    |
| <i>TKTL1</i>    | 0                       | 0                                      | 0                                      | 0                                                  | 0            | 1                     | 0    |
| <i>TLE2</i>     | 1                       | 0                                      | 0                                      | 0                                                  | 0            | 0                     | 0    |
| <i>TLE3</i>     | 1                       | 0                                      | 0                                      | 0                                                  | 0            | 1                     | 0    |
| <i>TLE6</i>     | 1                       | 0                                      | 0                                      | 0                                                  | 0            | 0                     | 0    |
| <i>TLL1</i>     | 0                       | 0                                      | 0                                      | 0                                                  | 0            | 0                     | 1    |
| <i>TLR2</i>     | 0                       | 0                                      | 0                                      | 0                                                  | 0            | 1                     | 0    |
| <i>TLR4</i>     | 0                       | 0                                      | 0                                      | 0                                                  | 0            | 1                     | 0    |
| <i>TLR6</i>     | 1                       | 0                                      | 0                                      | 0                                                  | 0            | 0                     | 0    |
| <i>TLX1NB</i>   | 0                       | 0                                      | 0                                      | 0                                                  | 0            | 1                     | 0    |
| <i>TLX2</i>     | 0                       | 0                                      | 0                                      | 0                                                  | 0            | 1                     | 0    |
| <i>TMBIM6</i>   | 1                       | 0                                      | 0                                      | 0                                                  | 0            | 0                     | 0    |
| <i>TMC8</i>     | 1                       | 0                                      | 0                                      | 0                                                  | 0            | 0                     | 0    |
| <i>TMCC1</i>    | 1                       | 0                                      | 0                                      | 0                                                  | 0            | 0                     | 0    |
| <i>TMCC2</i>    | 1                       | 0                                      | 0                                      | 0                                                  | 0            | 0                     | 0    |
| <i>TMCO3</i>    | 1                       | 0                                      | 0                                      | 0                                                  | 0            | 0                     | 0    |
| <i>TMCO6</i>    | 1                       | 0                                      | 0                                      | 0                                                  | 0            | 0                     | 0    |
| <i>TMED6</i>    | 1                       | 0                                      | 0                                      | 0                                                  | 0            | 0                     | 0    |
| <i>TMEM102</i>  | 1                       | 0                                      | 1                                      | 0                                                  | 0            | 0                     | 0    |

| Gene           | Multi-omics integration | Gene-based result from AFGen 2017 GWAS | Gene-based result from AFGen 2018 GWAS | Meta-analysis of SNPs by two large AF GWAS in 2018 | GWAS catalog | Open Targets Platform | OMIM |
|----------------|-------------------------|----------------------------------------|----------------------------------------|----------------------------------------------------|--------------|-----------------------|------|
| <i>TMEM135</i> | 1                       | 0                                      | 0                                      | 0                                                  | 0            | 0                     | 0    |
| <i>TMEM144</i> | 1                       | 0                                      | 0                                      | 0                                                  | 0            | 0                     | 0    |
| <i>TMEM145</i> | 1                       | 0                                      | 0                                      | 0                                                  | 0            | 0                     | 0    |
| <i>TMEM160</i> | 1                       | 0                                      | 0                                      | 0                                                  | 0            | 0                     | 0    |
| <i>TMEM171</i> | 1                       | 0                                      | 0                                      | 0                                                  | 0            | 0                     | 0    |
| <i>TMEM173</i> | 1                       | 0                                      | 0                                      | 0                                                  | 0            | 0                     | 0    |
| <i>TMEM176</i> | 1                       | 0                                      | 0                                      | 0                                                  | 0            | 0                     | 0    |
| <i>B</i>       | 1                       | 0                                      | 0                                      | 0                                                  | 0            | 0                     | 0    |
| <i>TMEM18</i>  | 1                       | 0                                      | 0                                      | 0                                                  | 0            | 0                     | 0    |
| <i>TMEM183</i> | 1                       | 0                                      | 1                                      | 0                                                  | 0            | 0                     | 0    |
| <i>A</i>       | 1                       | 0                                      | 0                                      | 0                                                  | 0            | 0                     | 0    |
| <i>TMEM189</i> | 1                       | 0                                      | 0                                      | 0                                                  | 0            | 0                     | 0    |
| <i>TMEM203</i> | 0                       | 0                                      | 0                                      | 0                                                  | 0            | 1                     | 0    |
| <i>TMEM256</i> | 0                       | 0                                      | 0                                      | 0                                                  | 0            | 1                     | 0    |
| <i>TMEM256</i> | 0                       | 0                                      | 0                                      | 0                                                  | 0            | 1                     | 0    |
| <i>-PLSCR3</i> | 0                       | 0                                      | 0                                      | 0                                                  | 0            | 1                     | 0    |
| <i>TMEM40</i>  | 1                       | 0                                      | 1                                      | 0                                                  | 0            | 0                     | 0    |
| <i>TMEM43</i>  | 0                       | 0                                      | 0                                      | 0                                                  | 0            | 0                     | 1    |
| <i>TMEM44</i>  | 1                       | 0                                      | 0                                      | 0                                                  | 0            | 0                     | 0    |
| <i>TMEM60</i>  | 1                       | 0                                      | 1                                      | 0                                                  | 0            | 0                     | 0    |
| <i>TMEM65</i>  | 0                       | 0                                      | 0                                      | 0                                                  | 0            | 0                     | 1    |
| <i>TMEM79</i>  | 1                       | 0                                      | 0                                      | 0                                                  | 0            | 0                     | 0    |
| <i>TMEM87</i>  | 0                       | 0                                      | 0                                      | 0                                                  | 0            | 0                     | 1    |
| <i>B</i>       | 0                       | 0                                      | 0                                      | 0                                                  | 0            | 0                     | 1    |
| <i>TMEM91</i>  | 1                       | 0                                      | 0                                      | 0                                                  | 0            | 0                     | 0    |
| <i>TMEM95</i>  | 1                       | 0                                      | 0                                      | 0                                                  | 0            | 0                     | 0    |
| <i>TMEM9B</i>  | 1                       | 0                                      | 0                                      | 0                                                  | 0            | 0                     | 0    |
| <i>TMF1</i>    | 1                       | 0                                      | 0                                      | 0                                                  | 0            | 0                     | 0    |
| <i>TMIE</i>    | 1                       | 0                                      | 0                                      | 0                                                  | 0            | 0                     | 0    |
| <i>TMPO</i>    | 0                       | 0                                      | 0                                      | 0                                                  | 0            | 0                     | 1    |
| <i>TMPRSS2</i> | 0                       | 0                                      | 0                                      | 0                                                  | 1            | 1                     | 0    |
| <i>TMUB2</i>   | 1                       | 0                                      | 0                                      | 0                                                  | 0            | 0                     | 0    |
| <i>TNC</i>     | 0                       | 0                                      | 0                                      | 0                                                  | 0            | 0                     | 1    |
| <i>TNF</i>     | 1                       | 0                                      | 0                                      | 0                                                  | 0            | 1                     | 0    |
| <i>TNFRSF1</i> | 0                       | 0                                      | 0                                      | 0                                                  | 0            | 1                     | 0    |
| <i>1B</i>      | 0                       | 0                                      | 0                                      | 0                                                  | 0            | 0                     | 1    |
| <i>TNFRSF1</i> | 0                       | 0                                      | 0                                      | 0                                                  | 0            | 0                     | 1    |
| <i>2A</i>      | 0                       | 0                                      | 0                                      | 0                                                  | 0            | 0                     | 1    |
| <i>TNFRSF1</i> | 0                       | 0                                      | 0                                      | 0                                                  | 0            | 1                     | 0    |
| <i>3B</i>      | 0                       | 0                                      | 0                                      | 0                                                  | 0            | 1                     | 0    |
| <i>TNFRSF1</i> | 0                       | 0                                      | 0                                      | 0                                                  | 0            | 1                     | 0    |
| <i>A</i>       | 0                       | 0                                      | 0                                      | 0                                                  | 0            | 1                     | 0    |
| <i>TNFRSF1</i> | 0                       | 0                                      | 0                                      | 0                                                  | 0            | 1                     | 0    |
| <i>B</i>       | 0                       | 0                                      | 0                                      | 0                                                  | 0            | 1                     | 0    |
| <i>TNFSF11</i> | 0                       | 0                                      | 0                                      | 0                                                  | 0            | 1                     | 0    |
| <i>TNFSF12</i> | 0                       | 0                                      | 0                                      | 1                                                  | 1            | 1                     | 0    |

| Gene                   | Multi-omics integration | Gene-based result from AFGen 2017 GWAS | Gene-based result from AFGen 2018 GWAS | Meta-analysis of SNPs by two large AF GWAS in 2018 | GWAS catalog | Open Targets Platform | OMIM |
|------------------------|-------------------------|----------------------------------------|----------------------------------------|----------------------------------------------------|--------------|-----------------------|------|
| <i>TNFSF12-TNFSF13</i> | 1                       | 0                                      | 1                                      | 0                                                  | 1            | 0                     | 0    |
| <i>TNFSF13</i>         | 0                       | 0                                      | 0                                      | 0                                                  | 0            | 1                     | 0    |
| <i>TNIP1</i>           | 1                       | 0                                      | 0                                      | 0                                                  | 0            | 0                     | 0    |
| <i>TNK1</i>            | 1                       | 0                                      | 0                                      | 0                                                  | 0            | 0                     | 0    |
| <i>TNK2</i>            | 1                       | 0                                      | 0                                      | 0                                                  | 0            | 0                     | 0    |
| <i>TNNC1</i>           | 0                       | 0                                      | 0                                      | 0                                                  | 0            | 0                     | 1    |
| <i>TNNI1</i>           | 0                       | 0                                      | 0                                      | 0                                                  | 0            | 1                     | 0    |
| <i>TNNI2</i>           | 0                       | 0                                      | 0                                      | 0                                                  | 0            | 0                     | 1    |
| <i>TNNI3</i>           | 0                       | 0                                      | 0                                      | 0                                                  | 0            | 1                     | 1    |
| <i>TNNI3K</i>          | 1                       | 0                                      | 0                                      | 0                                                  | 0            | 0                     | 1    |
| <i>TNNT2</i>           | 0                       | 0                                      | 0                                      | 0                                                  | 0            | 1                     | 1    |
| <i>TNNT3</i>           | 1                       | 0                                      | 0                                      | 0                                                  | 0            | 0                     | 0    |
| <i>TNPO1</i>           | 1                       | 0                                      | 0                                      | 0                                                  | 0            | 1                     | 0    |
| <i>TNRC6C</i>          | 1                       | 0                                      | 0                                      | 0                                                  | 0            | 0                     | 0    |
| <i>TNXB</i>            | 1                       | 0                                      | 0                                      | 0                                                  | 0            | 1                     | 0    |
| <i>TOB1</i>            | 0                       | 0                                      | 0                                      | 0                                                  | 0            | 1                     | 0    |
| <i>TOF</i>             | 0                       | 0                                      | 0                                      | 0                                                  | 0            | 0                     | 1    |
| <i>TOP2B</i>           | 1                       | 0                                      | 0                                      | 0                                                  | 0            | 0                     | 0    |
| <i>TOPBP1</i>          | 1                       | 0                                      | 0                                      | 0                                                  | 0            | 0                     | 0    |
| <i>TOR3A</i>           | 1                       | 0                                      | 0                                      | 0                                                  | 0            | 0                     | 0    |
| <i>TOX2</i>            | 1                       | 0                                      | 0                                      | 0                                                  | 0            | 0                     | 0    |
| <i>TP53</i>            | 1                       | 0                                      | 0                                      | 0                                                  | 0            | 0                     | 0    |
| <i>TP53AIP1</i>        | 1                       | 0                                      | 1                                      | 0                                                  | 0            | 0                     | 0    |
| <i>TP63</i>            | 0                       | 0                                      | 0                                      | 0                                                  | 0            | 1                     | 0    |
| <i>TPCN1</i>           | 1                       | 0                                      | 0                                      | 0                                                  | 0            | 0                     | 0    |
| <i>TPCN2</i>           | 1                       | 0                                      | 0                                      | 0                                                  | 0            | 0                     | 0    |
| <i>TPR</i>             | 0                       | 0                                      | 0                                      | 0                                                  | 0            | 1                     | 0    |
| <i>TPRKB</i>           | 1                       | 0                                      | 0                                      | 0                                                  | 0            | 0                     | 0    |
| <i>TRADD</i>           | 0                       | 0                                      | 0                                      | 0                                                  | 0            | 1                     | 0    |
| <i>TRAF5</i>           | 1                       | 0                                      | 0                                      | 0                                                  | 0            | 0                     | 0    |
| <i>TRAF6</i>           | 0                       | 0                                      | 0                                      | 0                                                  | 0            | 1                     | 0    |
| <i>TRAF7</i>           | 1                       | 0                                      | 0                                      | 0                                                  | 0            | 0                     | 0    |
| <i>TRAK1</i>           | 1                       | 0                                      | 0                                      | 0                                                  | 0            | 0                     | 0    |
| <i>TRAK2</i>           | 1                       | 0                                      | 0                                      | 0                                                  | 0            | 0                     | 0    |
| <i>TRAM2</i>           | 1                       | 0                                      | 0                                      | 0                                                  | 0            | 0                     | 0    |
| <i>TRAPPC9</i>         | 0                       | 0                                      | 0                                      | 0                                                  | 0            | 1                     | 0    |
| <i>TRDN</i>            | 0                       | 0                                      | 0                                      | 0                                                  | 0            | 0                     | 1    |
| <i>TRH</i>             | 1                       | 0                                      | 0                                      | 0                                                  | 0            | 1                     | 0    |
| <i>TRIB1</i>           | 0                       | 0                                      | 0                                      | 0                                                  | 1            | 1                     | 0    |
| <i>TRIM13</i>          | 1                       | 0                                      | 0                                      | 0                                                  | 0            | 0                     | 0    |
| <i>TRIM27</i>          | 1                       | 0                                      | 0                                      | 0                                                  | 0            | 0                     | 0    |
| <i>TRIM35</i>          | 1                       | 0                                      | 0                                      | 0                                                  | 0            | 0                     | 0    |
| <i>TRIM37</i>          | 1                       | 0                                      | 0                                      | 0                                                  | 0            | 0                     | 0    |

| Gene              | Multi-omics integration | Gene-based result from AFGen 2017 GWAS | Gene-based result from AFGen 2018 GWAS | Meta-analysis of SNPs by two large AF GWAS in 2018 | GWAS catalog | Open Targets Platform | OMIM |
|-------------------|-------------------------|----------------------------------------|----------------------------------------|----------------------------------------------------|--------------|-----------------------|------|
| <i>TRIM46</i>     | 1                       | 0                                      | 0                                      | 0                                                  | 0            | 0                     | 0    |
| <i>TRIM55</i>     | 0                       | 0                                      | 0                                      | 0                                                  | 0            | 1                     | 0    |
| <i>TRIM58</i>     | 1                       | 0                                      | 0                                      | 0                                                  | 0            | 0                     | 0    |
| <i>TRIM62</i>     | 1                       | 0                                      | 0                                      | 0                                                  | 0            | 0                     | 0    |
| <i>TRIM72</i>     | 0                       | 0                                      | 0                                      | 0                                                  | 0            | 1                     | 0    |
| <i>TRIM8</i>      | 1                       | 0                                      | 0                                      | 0                                                  | 0            | 0                     | 0    |
| <i>TRIML2</i>     | 1                       | 0                                      | 0                                      | 0                                                  | 0            | 0                     | 0    |
| <i>TRIP13</i>     | 1                       | 0                                      | 0                                      | 0                                                  | 0            | 1                     | 0    |
| <i>TRMA</i>       | 0                       | 0                                      | 0                                      | 0                                                  | 0            | 0                     | 1    |
| <i>TRMT5</i>      | 1                       | 0                                      | 0                                      | 0                                                  | 0            | 0                     | 0    |
| <i>TRPA1</i>      | 0                       | 0                                      | 0                                      | 0                                                  | 0            | 1                     | 0    |
| <i>TRP-AGG2-8</i> | 0                       | 0                                      | 0                                      | 0                                                  | 1            | 0                     | 0    |
| <i>TRPC1</i>      | 0                       | 0                                      | 0                                      | 0                                                  | 0            | 1                     | 0    |
| <i>TRPC3</i>      | 1                       | 0                                      | 0                                      | 0                                                  | 0            | 1                     | 0    |
| <i>TRPC4</i>      | 0                       | 0                                      | 0                                      | 0                                                  | 0            | 1                     | 0    |
| <i>TRPC5</i>      | 0                       | 0                                      | 0                                      | 0                                                  | 0            | 1                     | 0    |
| <i>TRPC6</i>      | 0                       | 0                                      | 0                                      | 0                                                  | 0            | 1                     | 0    |
| <i>TRPM2</i>      | 1                       | 0                                      | 0                                      | 1                                                  | 0            | 0                     | 0    |
| <i>TRPM3</i>      | 0                       | 0                                      | 0                                      | 0                                                  | 0            | 1                     | 0    |
| <i>TRPM4</i>      | 0                       | 0                                      | 0                                      | 0                                                  | 0            | 1                     | 1    |
| <i>TRPM5</i>      | 0                       | 0                                      | 0                                      | 0                                                  | 0            | 1                     | 0    |
| <i>TRPM6</i>      | 0                       | 0                                      | 0                                      | 0                                                  | 0            | 1                     | 0    |
| <i>TRPM7</i>      | 0                       | 0                                      | 0                                      | 0                                                  | 0            | 1                     | 1    |
| <i>TRPM8</i>      | 0                       | 0                                      | 0                                      | 0                                                  | 0            | 1                     | 0    |
| <i>TRPV1</i>      | 0                       | 0                                      | 0                                      | 0                                                  | 0            | 1                     | 0    |
| <i>TRPV2</i>      | 0                       | 0                                      | 0                                      | 0                                                  | 0            | 1                     | 0    |
| <i>TRPV3</i>      | 0                       | 0                                      | 0                                      | 0                                                  | 0            | 1                     | 0    |
| <i>TRPV4</i>      | 0                       | 0                                      | 0                                      | 0                                                  | 0            | 1                     | 0    |
| <i>TRPV5</i>      | 0                       | 0                                      | 0                                      | 0                                                  | 0            | 1                     | 0    |
| <i>TRPV6</i>      | 0                       | 0                                      | 0                                      | 0                                                  | 0            | 1                     | 0    |
| <i>TS</i>         | 0                       | 0                                      | 0                                      | 0                                                  | 0            | 0                     | 1    |
| <i>TSBP1</i>      | 0                       | 0                                      | 0                                      | 0                                                  | 0            | 1                     | 0    |
| <i>TSC1</i>       | 0                       | 0                                      | 0                                      | 0                                                  | 0            | 0                     | 1    |
| <i>TSC2</i>       | 1                       | 0                                      | 1                                      | 0                                                  | 0            | 0                     | 0    |
| <i>TSC22D2</i>    | 1                       | 0                                      | 0                                      | 0                                                  | 0            | 0                     | 0    |
| <i>TSHR</i>       | 0                       | 0                                      | 0                                      | 0                                                  | 0            | 1                     | 0    |
| <i>TSNARE1</i>    | 1                       | 0                                      | 0                                      | 0                                                  | 0            | 0                     | 0    |
| <i>TSPAN10</i>    | 0                       | 0                                      | 0                                      | 0                                                  | 0            | 1                     | 0    |
| <i>TSPAN13</i>    | 1                       | 0                                      | 0                                      | 0                                                  | 0            | 0                     | 0    |
| <i>TSPAN2</i>     | 0                       | 0                                      | 0                                      | 0                                                  | 0            | 1                     | 0    |
| <i>TSPAN32</i>    | 1                       | 0                                      | 0                                      | 0                                                  | 0            | 0                     | 0    |
| <i>TSPAN9</i>     | 1                       | 0                                      | 0                                      | 0                                                  | 0            | 1                     | 0    |
| <i>TTC12</i>      | 1                       | 0                                      | 0                                      | 0                                                  | 0            | 0                     | 0    |



| Gene           | Multi-omics integration | Gene-based result from AFGen 2017 GWAS | Gene-based result from AFGen 2018 GWAS | Meta-analysis of SNPs by two large AF GWAS in 2018 | GWAS catalog | Open Targets Platform | OMIM |
|----------------|-------------------------|----------------------------------------|----------------------------------------|----------------------------------------------------|--------------|-----------------------|------|
| <i>TTC27</i>   | 1                       | 0                                      | 0                                      | 0                                                  | 0            | 0                     | 0    |
| <i>TTC29</i>   | 1                       | 0                                      | 0                                      | 0                                                  | 0            | 0                     | 0    |
| <i>TTC3</i>    | 0                       | 0                                      | 0                                      | 0                                                  | 0            | 1                     | 0    |
| <i>TTC39A</i>  | 1                       | 0                                      | 0                                      | 0                                                  | 0            | 0                     | 0    |
| <i>TTC9B</i>   | 1                       | 0                                      | 0                                      | 0                                                  | 0            | 0                     | 0    |
| <i>TLL7</i>    | 0                       | 0                                      | 0                                      | 0                                                  | 0            | 1                     | 0    |
| <i>TTN</i>     | 1                       | 0                                      | 1                                      | 1                                                  | 1            | 1                     | 1    |
| <i>TTN-AS1</i> | 0                       | 0                                      | 0                                      | 0                                                  | 1            | 0                     | 0    |
| <i>TTR</i>     | 0                       | 0                                      | 0                                      | 0                                                  | 0            | 1                     | 1    |
| <i>TTYH3</i>   | 1                       | 0                                      | 0                                      | 0                                                  | 0            | 0                     | 0    |
| <i>TUB</i>     | 1                       | 0                                      | 0                                      | 0                                                  | 0            | 0                     | 0    |
| <i>TUBA1A</i>  | 0                       | 0                                      | 0                                      | 0                                                  | 0            | 1                     | 0    |
| <i>TUBA1B</i>  | 0                       | 0                                      | 0                                      | 0                                                  | 0            | 1                     | 0    |
| <i>TUBA1C</i>  | 0                       | 0                                      | 0                                      | 0                                                  | 0            | 1                     | 0    |
| <i>TUBA3D</i>  | 0                       | 0                                      | 0                                      | 0                                                  | 0            | 1                     | 0    |
| <i>TUBA3E</i>  | 0                       | 0                                      | 0                                      | 0                                                  | 0            | 1                     | 0    |
| <i>TUBA4A</i>  | 0                       | 0                                      | 0                                      | 0                                                  | 0            | 1                     | 0    |
| <i>TUBA8</i>   | 1                       | 0                                      | 0                                      | 1                                                  | 1            | 0                     | 0    |
| <i>TUBB</i>    | 0                       | 0                                      | 0                                      | 0                                                  | 0            | 1                     | 0    |
| <i>TUBB1</i>   | 0                       | 0                                      | 0                                      | 0                                                  | 0            | 1                     | 0    |
| <i>TUBB2A</i>  | 0                       | 0                                      | 0                                      | 0                                                  | 0            | 1                     | 0    |
| <i>TUBB2B</i>  | 0                       | 0                                      | 0                                      | 0                                                  | 0            | 1                     | 0    |
| <i>TUBB3</i>   | 0                       | 0                                      | 0                                      | 0                                                  | 0            | 1                     | 0    |
| <i>TUBB4A</i>  | 0                       | 0                                      | 0                                      | 0                                                  | 0            | 1                     | 0    |
| <i>TUBB4B</i>  | 0                       | 0                                      | 0                                      | 0                                                  | 0            | 1                     | 0    |
| <i>TUBB6</i>   | 0                       | 0                                      | 0                                      | 0                                                  | 0            | 1                     | 0    |
| <i>TUBB8</i>   | 0                       | 0                                      | 0                                      | 0                                                  | 0            | 1                     | 0    |
| <i>TUBGCP6</i> | 1                       | 0                                      | 0                                      | 0                                                  | 0            | 0                     | 0    |
| <i>TUFM</i>    | 1                       | 0                                      | 0                                      | 0                                                  | 0            | 0                     | 0    |
| <i>TUFT1</i>   | 1                       | 0                                      | 0                                      | 0                                                  | 0            | 0                     | 0    |
| <i>TULP1</i>   | 1                       | 0                                      | 0                                      | 0                                                  | 0            | 0                     | 0    |
| <i>TUSC2</i>   | 1                       | 0                                      | 0                                      | 0                                                  | 0            | 0                     | 0    |
| <i>TWF1</i>    | 1                       | 0                                      | 0                                      | 0                                                  | 0            | 0                     | 0    |
| <i>TXNDC5</i>  | 1                       | 0                                      | 0                                      | 0                                                  | 0            | 0                     | 0    |
| <i>TXNIP</i>   | 0                       | 0                                      | 0                                      | 0                                                  | 0            | 1                     | 0    |
| <i>TXNRD1</i>  | 1                       | 0                                      | 0                                      | 0                                                  | 0            | 0                     | 0    |
| <i>TXNRD2</i>  | 0                       | 0                                      | 0                                      | 0                                                  | 0            | 1                     | 0    |
| <i>TYK2</i>    | 1                       | 0                                      | 0                                      | 0                                                  | 0            | 0                     | 0    |
| <i>TYRO3</i>   | 0                       | 0                                      | 0                                      | 0                                                  | 0            | 1                     | 0    |
| <i>UBAC1</i>   | 1                       | 0                                      | 0                                      | 0                                                  | 0            | 0                     | 0    |
| <i>UBB</i>     | 1                       | 0                                      | 0                                      | 0                                                  | 0            | 0                     | 0    |
| <i>UBC</i>     | 0                       | 0                                      | 0                                      | 0                                                  | 0            | 1                     | 0    |
| <i>UBE2D3</i>  | 0                       | 0                                      | 1                                      | 0                                                  | 0            | 0                     | 0    |
| <i>UBE2D4</i>  | 1                       | 0                                      | 0                                      | 0                                                  | 0            | 0                     | 0    |

| Gene            | Multi-omics integration | Gene-based result from AFGen 2017 GWAS | Gene-based result from AFGen 2018 GWAS | Meta-analysis of SNPs by two large AF GWAS in 2018 | GWAS catalog | Open Targets Platform | OMIM |
|-----------------|-------------------------|----------------------------------------|----------------------------------------|----------------------------------------------------|--------------|-----------------------|------|
| <i>UBE2E1</i>   | 1                       | 0                                      | 0                                      | 0                                                  | 0            | 0                     | 0    |
| <i>UBE2F</i>    | 1                       | 0                                      | 0                                      | 0                                                  | 0            | 0                     | 0    |
| <i>UBE2G1</i>   | 0                       | 0                                      | 0                                      | 0                                                  | 0            | 1                     | 0    |
| <i>UBE2H</i>    | 1                       | 0                                      | 0                                      | 0                                                  | 0            | 0                     | 0    |
| <i>UBE2O</i>    | 1                       | 0                                      | 0                                      | 0                                                  | 0            | 0                     | 0    |
| <i>UBE2Q1</i>   | 1                       | 0                                      | 0                                      | 0                                                  | 0            | 0                     | 0    |
| <i>UBE3B</i>    | 1                       | 0                                      | 0                                      | 0                                                  | 0            | 0                     | 0    |
| <i>UBE4B</i>    | 0                       | 0                                      | 0                                      | 0                                                  | 1            | 0                     | 0    |
| <i>UBP1</i>     | 1                       | 0                                      | 0                                      | 0                                                  | 0            | 0                     | 0    |
| <i>UBQLN4</i>   | 1                       | 0                                      | 0                                      | 0                                                  | 0            | 0                     | 0    |
| <i>UBQLN4P1</i> | 0                       | 0                                      | 0                                      | 1                                                  | 0            | 0                     | 0    |
| <i>UBR1</i>     | 0                       | 0                                      | 0                                      | 0                                                  | 0            | 0                     | 1    |
| <i>UBR5</i>     | 0                       | 0                                      | 0                                      | 0                                                  | 0            | 1                     | 0    |
| <i>UBTD2</i>    | 1                       | 0                                      | 0                                      | 0                                                  | 0            | 0                     | 0    |
| <i>UCHL1</i>    | 1                       | 0                                      | 0                                      | 0                                                  | 0            | 0                     | 0    |
| <i>UCN</i>      | 0                       | 0                                      | 0                                      | 0                                                  | 0            | 1                     | 0    |
| <i>UCN3</i>     | 0                       | 0                                      | 0                                      | 0                                                  | 0            | 1                     | 0    |
| <i>UGCG</i>     | 1                       | 0                                      | 0                                      | 0                                                  | 0            | 1                     | 0    |
| <i>UGDH</i>     | 0                       | 0                                      | 0                                      | 0                                                  | 0            | 0                     | 1    |
| <i>UHRF1</i>    | 1                       | 0                                      | 0                                      | 0                                                  | 0            | 0                     | 0    |
| <i>UHRF1BP1</i> | 1                       | 0                                      | 0                                      | 0                                                  | 0            | 0                     | 0    |
| <i>UNC5CL</i>   | 1                       | 0                                      | 0                                      | 0                                                  | 0            | 0                     | 0    |
| <i>UQCRB</i>    | 1                       | 0                                      | 0                                      | 0                                                  | 0            | 0                     | 0    |
| <i>URGCP</i>    | 1                       | 0                                      | 0                                      | 0                                                  | 0            | 0                     | 0    |
| <i>UR11</i>     | 0                       | 0                                      | 0                                      | 0                                                  | 0            | 1                     | 0    |
| <i>USF2</i>     | 1                       | 0                                      | 0                                      | 0                                                  | 0            | 0                     | 0    |
| <i>USO1</i>     | 1                       | 0                                      | 0                                      | 0                                                  | 0            | 0                     | 0    |
| <i>USP18</i>    | 1                       | 0                                      | 0                                      | 0                                                  | 0            | 0                     | 0    |
| <i>USP3</i>     | 1                       | 0                                      | 0                                      | 0                                                  | 1            | 1                     | 0    |
| <i>USP31</i>    | 0                       | 0                                      | 0                                      | 0                                                  | 0            | 1                     | 0    |
| <i>USP34</i>    | 1                       | 0                                      | 1                                      | 1                                                  | 1            | 0                     | 0    |
| <i>USP36</i>    | 1                       | 0                                      | 0                                      | 0                                                  | 0            | 0                     | 0    |
| <i>USP54</i>    | 1                       | 0                                      | 0                                      | 0                                                  | 0            | 0                     | 0    |
| <i>UST</i>      | 1                       | 0                                      | 1                                      | 1                                                  | 1            | 1                     | 0    |
| <i>UTS2</i>     | 0                       | 0                                      | 0                                      | 0                                                  | 0            | 1                     | 0    |
| <i>UXS1</i>     | 1                       | 0                                      | 0                                      | 0                                                  | 0            | 0                     | 0    |
| <i>VACTERLX</i> | 0                       | 0                                      | 0                                      | 0                                                  | 0            | 0                     | 1    |
| <i>VAMP2</i>    | 0                       | 0                                      | 0                                      | 0                                                  | 0            | 1                     | 0    |
| <i>VANGL1</i>   | 0                       | 0                                      | 1                                      | 0                                                  | 0            | 0                     | 0    |
| <i>VARS</i>     | 1                       | 0                                      | 0                                      | 0                                                  | 0            | 0                     | 0    |
| <i>VASP</i>     | 0                       | 0                                      | 0                                      | 0                                                  | 0            | 1                     | 0    |

| Gene            | Multi-omics integration | Gene-based result from AFGen 2017 GWAS | Gene-based result from AFGen 2018 GWAS | Meta-analysis of SNPs by two large AF GWAS in 2018 | GWAS catalog | Open Targets Platform | OMIM |
|-----------------|-------------------------|----------------------------------------|----------------------------------------|----------------------------------------------------|--------------|-----------------------|------|
| <i>VCAMI</i>    | 0                       | 0                                      | 0                                      | 0                                                  | 0            | 1                     | 0    |
| <i>VCPIP1</i>   | 1                       | 0                                      | 0                                      | 0                                                  | 0            | 0                     | 0    |
| <i>VCRL1</i>    | 0                       | 0                                      | 0                                      | 0                                                  | 0            | 0                     | 1    |
| <i>VDAC2</i>    | 1                       | 0                                      | 0                                      | 0                                                  | 0            | 0                     | 0    |
| <i>VEGFA</i>    | 1                       | 0                                      | 0                                      | 0                                                  | 0            | 1                     | 0    |
| <i>VEGFB</i>    | 0                       | 0                                      | 0                                      | 0                                                  | 0            | 1                     | 0    |
| <i>VEPH1</i>    | 1                       | 0                                      | 0                                      | 0                                                  | 0            | 0                     | 0    |
| <i>VETD</i>     | 0                       | 0                                      | 0                                      | 0                                                  | 0            | 0                     | 1    |
| <i>VF1</i>      | 0                       | 0                                      | 0                                      | 0                                                  | 0            | 0                     | 1    |
| <i>VF2</i>      | 0                       | 0                                      | 0                                      | 0                                                  | 0            | 0                     | 1    |
| <i>VGLL2</i>    | 1                       | 0                                      | 0                                      | 0                                                  | 0            | 0                     | 0    |
| <i>VGLL3</i>    | 0                       | 0                                      | 0                                      | 0                                                  | 0            | 1                     | 0    |
| <i>VGLL4</i>    | 1                       | 0                                      | 0                                      | 0                                                  | 0            | 0                     | 0    |
| <i>VILL</i>     | 1                       | 0                                      | 0                                      | 0                                                  | 0            | 0                     | 0    |
| <i>VIP</i>      | 0                       | 0                                      | 0                                      | 0                                                  | 0            | 1                     | 0    |
| <i>VKORC1</i>   | 0                       | 0                                      | 0                                      | 0                                                  | 0            | 1                     | 0    |
| <i>VKORC1L1</i> | 1                       | 0                                      | 0                                      | 0                                                  | 0            | 0                     | 0    |
| <i>VODI</i>     | 0                       | 0                                      | 0                                      | 0                                                  | 0            | 0                     | 1    |
| <i>VPREB3</i>   | 1                       | 0                                      | 0                                      | 0                                                  | 0            | 0                     | 0    |
| <i>VPS13C</i>   | 1                       | 0                                      | 0                                      | 0                                                  | 0            | 0                     | 0    |
| <i>VPS25</i>    | 1                       | 0                                      | 0                                      | 0                                                  | 0            | 0                     | 0    |
| <i>VPS26B</i>   | 1                       | 0                                      | 0                                      | 0                                                  | 0            | 0                     | 0    |
| <i>VPS37B</i>   | 1                       | 0                                      | 0                                      | 0                                                  | 0            | 0                     | 0    |
| <i>VPS37D</i>   | 0                       | 0                                      | 0                                      | 0                                                  | 1            | 0                     | 0    |
| <i>VPS39</i>    | 0                       | 0                                      | 0                                      | 0                                                  | 0            | 1                     | 0    |
| <i>VPS51</i>    | 0                       | 0                                      | 0                                      | 0                                                  | 0            | 1                     | 0    |
| <i>VPS54</i>    | 0                       | 0                                      | 0                                      | 0                                                  | 0            | 0                     | 1    |
| <i>VRJS</i>     | 0                       | 0                                      | 0                                      | 0                                                  | 0            | 0                     | 1    |
| <i>VSD1</i>     | 0                       | 0                                      | 0                                      | 0                                                  | 0            | 0                     | 1    |
| <i>VSD3</i>     | 0                       | 0                                      | 0                                      | 0                                                  | 0            | 0                     | 1    |
| <i>VSIG8</i>    | 0                       | 0                                      | 0                                      | 0                                                  | 0            | 1                     | 0    |
| <i>VSX2</i>     | 1                       | 0                                      | 0                                      | 0                                                  | 0            | 0                     | 0    |
| <i>VTIIA</i>    | 1                       | 0                                      | 0                                      | 0                                                  | 0            | 0                     | 0    |
| <i>VWA2</i>     | 1                       | 0                                      | 0                                      | 0                                                  | 0            | 0                     | 0    |
| <i>VWCE</i>     | 1                       | 0                                      | 0                                      | 0                                                  | 0            | 0                     | 0    |
| <i>VWF</i>      | 0                       | 0                                      | 0                                      | 0                                                  | 0            | 1                     | 0    |
| <i>WAC</i>      | 1                       | 0                                      | 0                                      | 0                                                  | 0            | 0                     | 0    |
| <i>WBS</i>      | 0                       | 0                                      | 0                                      | 0                                                  | 0            | 0                     | 1    |
| <i>WDFY1</i>    | 1                       | 0                                      | 0                                      | 0                                                  | 0            | 0                     | 0    |
| <i>WDR1</i>     | 0                       | 0                                      | 1                                      | 1                                                  | 1            | 1                     | 0    |
| <i>WDR24</i>    | 1                       | 0                                      | 0                                      | 0                                                  | 0            | 0                     | 0    |
| <i>WDR25</i>    | 1                       | 0                                      | 0                                      | 0                                                  | 0            | 0                     | 0    |
| <i>WDR26</i>    | 1                       | 0                                      | 0                                      | 0                                                  | 0            | 0                     | 0    |

| Gene          | Multi-omics integration | Gene-based result from AFGen 2017 GWAS | Gene-based result from AFGen 2018 GWAS | Meta-analysis of SNPs by two large AF GWAS in 2018 | GWAS catalog | Open Targets Platform | OMIM |
|---------------|-------------------------|----------------------------------------|----------------------------------------|----------------------------------------------------|--------------|-----------------------|------|
| <i>WDR27</i>  | 1                       | 0                                      | 0                                      | 0                                                  | 0            | 0                     | 0    |
| <i>WDR41</i>  | 1                       | 0                                      | 0                                      | 0                                                  | 0            | 0                     | 0    |
| <i>WDR55</i>  | 1                       | 0                                      | 0                                      | 0                                                  | 0            | 0                     | 0    |
| <i>WDR5B</i>  | 1                       | 0                                      | 0                                      | 0                                                  | 0            | 0                     | 0    |
| <i>WDR6</i>   | 0                       | 0                                      | 0                                      | 0                                                  | 0            | 0                     | 1    |
| <i>WDR62</i>  | 1                       | 0                                      | 0                                      | 0                                                  | 0            | 0                     | 0    |
| <i>WDR72</i>  | 0                       | 0                                      | 0                                      | 0                                                  | 0            | 1                     | 0    |
| <i>WDR73</i>  | 1                       | 0                                      | 0                                      | 0                                                  | 0            | 0                     | 0    |
| <i>WDR81</i>  | 1                       | 0                                      | 0                                      | 0                                                  | 0            | 0                     | 0    |
| <i>WDR90</i>  | 1                       | 0                                      | 0                                      | 0                                                  | 0            | 0                     | 0    |
| <i>WDR93</i>  | 1                       | 0                                      | 0                                      | 0                                                  | 0            | 0                     | 0    |
| <i>WDYHVI</i> | 1                       | 0                                      | 0                                      | 0                                                  | 0            | 0                     | 0    |
| <i>WHS</i>    | 0                       | 0                                      | 0                                      | 0                                                  | 0            | 0                     | 1    |
| <i>WIPF1</i>  | 1                       | 0                                      | 1                                      | 1                                                  | 1            | 1                     | 0    |
| <i>WNK1</i>   | 1                       | 0                                      | 0                                      | 0                                                  | 0            | 0                     | 0    |
| <i>WNT3</i>   | 1                       | 0                                      | 0                                      | 1                                                  | 1            | 0                     | 0    |
| <i>WNT5A</i>  | 1                       | 0                                      | 0                                      | 0                                                  | 0            | 0                     | 0    |
| <i>WNT8A</i>  | 1                       | 1                                      | 1                                      | 1                                                  | 1            | 1                     | 0    |
| <i>WNT9A</i>  | 1                       | 0                                      | 0                                      | 0                                                  | 0            | 0                     | 0    |
| <i>WRAP53</i> | 1                       | 0                                      | 0                                      | 0                                                  | 0            | 0                     | 0    |
| <i>WRB</i>    | 1                       | 0                                      | 0                                      | 0                                                  | 0            | 0                     | 0    |
| <i>WRN</i>    | 0                       | 0                                      | 0                                      | 0                                                  | 0            | 1                     | 0    |
| <i>WS3</i>    | 0                       | 0                                      | 0                                      | 0                                                  | 0            | 0                     | 1    |
| <i>WSS</i>    | 0                       | 0                                      | 0                                      | 0                                                  | 0            | 0                     | 1    |
| <i>WT1</i>    | 1                       | 0                                      | 0                                      | 0                                                  | 0            | 0                     | 0    |
| <i>WTAP</i>   | 0                       | 0                                      | 0                                      | 0                                                  | 0            | 1                     | 0    |
| <i>XBPI</i>   | 1                       | 0                                      | 0                                      | 0                                                  | 0            | 0                     | 1    |
| <i>XIRP1</i>  | 0                       | 0                                      | 0                                      | 0                                                  | 0            | 1                     | 0    |
| <i>XKR6</i>   | 1                       | 0                                      | 0                                      | 0                                                  | 0            | 0                     | 0    |
| <i>XPO1</i>   | 1                       | 0                                      | 1                                      | 0                                                  | 1            | 1                     | 0    |
| <i>XPO7</i>   | 1                       | 0                                      | 1                                      | 1                                                  | 1            | 1                     | 0    |
| <i>XRN2</i>   | 1                       | 0                                      | 0                                      | 0                                                  | 0            | 0                     | 0    |
| <i>XXYLT1</i> | 0                       | 0                                      | 0                                      | 1                                                  | 1            | 1                     | 0    |
| <i>XYLB</i>   | 1                       | 0                                      | 0                                      | 0                                                  | 0            | 0                     | 0    |
| <i>YAP1</i>   | 1                       | 0                                      | 0                                      | 0                                                  | 0            | 0                     | 0    |
| <i>YARS2</i>  | 1                       | 0                                      | 0                                      | 0                                                  | 0            | 0                     | 0    |
| <i>YBX2</i>   | 1                       | 0                                      | 0                                      | 0                                                  | 0            | 0                     | 0    |
| <i>YIPF4</i>  | 1                       | 0                                      | 0                                      | 0                                                  | 0            | 0                     | 0    |
| <i>YME1L1</i> | 1                       | 0                                      | 0                                      | 0                                                  | 0            | 0                     | 0    |
| <i>YPEL3</i>  | 1                       | 0                                      | 0                                      | 0                                                  | 0            | 0                     | 0    |
| <i>YWHAE</i>  | 1                       | 0                                      | 1                                      | 1                                                  | 1            | 0                     | 0    |
| <i>YWHAG</i>  | 1                       | 0                                      | 0                                      | 0                                                  | 0            | 0                     | 0    |
| <i>YWHAZ</i>  | 0                       | 0                                      | 0                                      | 0                                                  | 0            | 1                     | 0    |
| <i>YY1</i>    | 0                       | 0                                      | 0                                      | 0                                                  | 0            | 1                     | 0    |

| Gene           | Multi-omics integration | Gene-based result from AFGen 2017 GWAS | Gene-based result from AFGen 2018 GWAS | Meta-analysis of SNPs by two large AF GWAS in 2018 | GWAS catalog | Open Targets Platform | OMIM |
|----------------|-------------------------|----------------------------------------|----------------------------------------|----------------------------------------------------|--------------|-----------------------|------|
| <i>YY1API</i>  | 1                       | 0                                      | 0                                      | 0                                                  | 0            | 0                     | 0    |
| <i>ZAK</i>     | 0                       | 0                                      | 0                                      | 0                                                  | 0            | 0                     | 1    |
| <i>ZBED1P1</i> | 0                       | 0                                      | 0                                      | 0                                                  | 1            | 0                     | 0    |
| <i>ZBTB1</i>   | 1                       | 0                                      | 0                                      | 0                                                  | 0            | 0                     | 0    |
| <i>ZBTB12</i>  | 1                       | 0                                      | 0                                      | 0                                                  | 0            | 0                     | 0    |
| <i>ZBTB20</i>  | 0                       | 0                                      | 0                                      | 0                                                  | 0            | 1                     | 0    |
| <i>ZBTB25</i>  | 1                       | 0                                      | 0                                      | 0                                                  | 0            | 0                     | 0    |
| <i>ZBTB3</i>   | 1                       | 0                                      | 0                                      | 0                                                  | 0            | 0                     | 0    |
| <i>ZBTB38</i>  | 0                       | 0                                      | 0                                      | 1                                                  | 0            | 0                     | 0    |
| <i>ZBTB4</i>   | 1                       | 0                                      | 1                                      | 0                                                  | 0            | 0                     | 0    |
| <i>ZBTB46</i>  | 1                       | 0                                      | 0                                      | 0                                                  | 0            | 0                     | 0    |
| <i>ZBTB48</i>  | 1                       | 0                                      | 0                                      | 0                                                  | 0            | 0                     | 0    |
| <i>ZBTB7B</i>  | 1                       | 1                                      | 1                                      | 0                                                  | 0            | 0                     | 0    |
| <i>ZC3H11A</i> | 1                       | 0                                      | 0                                      | 0                                                  | 0            | 0                     | 0    |
| <i>ZC3HC1</i>  | 0                       | 0                                      | 0                                      | 0                                                  | 0            | 1                     | 0    |
| <i>ZCCHC24</i> | 1                       | 0                                      | 0                                      | 0                                                  | 0            | 0                     | 0    |
| <i>ZCCHC3</i>  | 1                       | 0                                      | 0                                      | 0                                                  | 0            | 0                     | 0    |
| <i>ZCCHC8</i>  | 0                       | 0                                      | 0                                      | 0                                                  | 1            | 1                     | 0    |
| <i>ZDHHC11</i> | 1                       | 0                                      | 0                                      | 0                                                  | 0            | 0                     | 0    |
| <i>ZEB2</i>    | 1                       | 0                                      | 0                                      | 0                                                  | 0            | 1                     | 1    |
| <i>ZFAND3</i>  | 1                       | 0                                      | 0                                      | 0                                                  | 0            | 1                     | 0    |
| <i>ZFAT</i>    | 0                       | 0                                      | 0                                      | 0                                                  | 0            | 1                     | 0    |
| <i>ZFHX3</i>   | 1                       | 1                                      | 1                                      | 1                                                  | 1            | 1                     | 1    |
| <i>ZFHX4</i>   | 1                       | 0                                      | 0                                      | 0                                                  | 0            | 0                     | 0    |
| <i>ZFP36L1</i> | 1                       | 0                                      | 0                                      | 0                                                  | 0            | 1                     | 0    |
| <i>ZFP42</i>   | 1                       | 0                                      | 0                                      | 0                                                  | 0            | 0                     | 0    |
| <i>ZFPM2</i>   | 1                       | 0                                      | 0                                      | 0                                                  | 0            | 0                     | 1    |
| <i>ZFYVE1</i>  | 1                       | 0                                      | 0                                      | 0                                                  | 0            | 0                     | 0    |
| <i>ZGLP1</i>   | 1                       | 0                                      | 0                                      | 0                                                  | 0            | 1                     | 0    |
| <i>ZGPAT</i>   | 0                       | 0                                      | 0                                      | 0                                                  | 0            | 1                     | 0    |
| <i>ZHX3</i>    | 1                       | 0                                      | 0                                      | 0                                                  | 1            | 1                     | 0    |
| <i>ZIC3</i>    | 0                       | 0                                      | 0                                      | 0                                                  | 0            | 0                     | 1    |
| <i>ZLS1</i>    | 0                       | 0                                      | 0                                      | 0                                                  | 0            | 0                     | 1    |
| <i>ZMIZ1</i>   | 1                       | 0                                      | 0                                      | 0                                                  | 0            | 0                     | 0    |
| <i>ZNF12</i>   | 1                       | 0                                      | 0                                      | 0                                                  | 0            | 0                     | 0    |
| <i>ZNF124</i>  | 1                       | 0                                      | 0                                      | 0                                                  | 0            | 0                     | 0    |
| <i>ZNF143</i>  | 0                       | 0                                      | 0                                      | 0                                                  | 0            | 1                     | 0    |
| <i>ZNF169</i>  | 1                       | 0                                      | 0                                      | 0                                                  | 0            | 0                     | 0    |
| <i>ZNF20</i>   | 1                       | 0                                      | 0                                      | 0                                                  | 0            | 0                     | 0    |
| <i>ZNF212</i>  | 1                       | 0                                      | 0                                      | 0                                                  | 0            | 0                     | 0    |
| <i>ZNF256</i>  | 1                       | 0                                      | 0                                      | 0                                                  | 0            | 0                     | 0    |
| <i>ZNF280B</i> | 1                       | 0                                      | 0                                      | 0                                                  | 0            | 0                     | 0    |
| <i>ZNF280D</i> | 1                       | 0                                      | 0                                      | 0                                                  | 0            | 0                     | 0    |
| <i>ZNF292</i>  | 0                       | 0                                      | 0                                      | 0                                                  | 1            | 1                     | 0    |

| Gene           | Multi-omics integration | Gene-based result from AFGen 2017 GWAS | Gene-based result from AFGen 2018 GWAS | Meta-analysis of SNPs by two large AF GWAS in 2018 | GWAS catalog | Open Targets Platform | OMIM |
|----------------|-------------------------|----------------------------------------|----------------------------------------|----------------------------------------------------|--------------|-----------------------|------|
| <i>ZNF362</i>  | 1                       | 0                                      | 0                                      | 0                                                  | 0            | 0                     | 0    |
| <i>ZNF366</i>  | 1                       | 0                                      | 0                                      | 0                                                  | 0            | 0                     | 0    |
| <i>ZNF367</i>  | 1                       | 0                                      | 0                                      | 0                                                  | 0            | 0                     | 0    |
| <i>ZNF395</i>  | 1                       | 0                                      | 0                                      | 0                                                  | 0            | 0                     | 0    |
| <i>ZNF414</i>  | 1                       | 0                                      | 0                                      | 0                                                  | 0            | 0                     | 0    |
| <i>ZNF417</i>  | 1                       | 0                                      | 0                                      | 0                                                  | 0            | 0                     | 0    |
| <i>ZNF418</i>  | 1                       | 0                                      | 0                                      | 0                                                  | 0            | 0                     | 0    |
| <i>ZNF436</i>  | 1                       | 0                                      | 0                                      | 0                                                  | 0            | 0                     | 0    |
| <i>ZNF460</i>  | 1                       | 0                                      | 0                                      | 0                                                  | 0            | 0                     | 0    |
| <i>ZNF462</i>  | 1                       | 0                                      | 0                                      | 1                                                  | 1            | 1                     | 0    |
| <i>ZNF48</i>   | 1                       | 0                                      | 0                                      | 0                                                  | 0            | 0                     | 0    |
| <i>ZNF526</i>  | 1                       | 0                                      | 0                                      | 0                                                  | 0            | 0                     | 0    |
| <i>ZNF574</i>  | 1                       | 0                                      | 0                                      | 0                                                  | 0            | 0                     | 0    |
| <i>ZNF587</i>  | 1                       | 0                                      | 0                                      | 0                                                  | 0            | 0                     | 0    |
| <i>ZNF598</i>  | 1                       | 0                                      | 0                                      | 0                                                  | 0            | 0                     | 0    |
| <i>ZNF606</i>  | 1                       | 0                                      | 0                                      | 0                                                  | 0            | 0                     | 0    |
| <i>ZNF619</i>  | 1                       | 0                                      | 0                                      | 0                                                  | 0            | 0                     | 0    |
| <i>ZNF620</i>  | 1                       | 0                                      | 0                                      | 0                                                  | 0            | 0                     | 0    |
| <i>ZNF641</i>  | 1                       | 0                                      | 0                                      | 0                                                  | 0            | 0                     | 0    |
| <i>ZNF653</i>  | 1                       | 0                                      | 0                                      | 0                                                  | 0            | 0                     | 0    |
| <i>ZNF664</i>  | 1                       | 0                                      | 1                                      | 0                                                  | 0            | 0                     | 0    |
| <i>ZNF689</i>  | 1                       | 0                                      | 0                                      | 0                                                  | 0            | 0                     | 0    |
| <i>ZNF7</i>    | 1                       | 0                                      | 0                                      | 0                                                  | 0            | 0                     | 0    |
| <i>ZNF70</i>   | 1                       | 0                                      | 0                                      | 0                                                  | 0            | 0                     | 0    |
| <i>ZNF713</i>  | 1                       | 0                                      | 0                                      | 0                                                  | 0            | 0                     | 0    |
| <i>ZNF737</i>  | 1                       | 0                                      | 0                                      | 0                                                  | 0            | 0                     | 0    |
| <i>ZNF767P</i> | 0                       | 0                                      | 0                                      | 0                                                  | 0            | 1                     | 0    |
| <i>ZNF771</i>  | 1                       | 0                                      | 0                                      | 0                                                  | 0            | 0                     | 0    |
| <i>ZNF787</i>  | 1                       | 0                                      | 0                                      | 0                                                  | 0            | 0                     | 0    |
| <i>ZP4</i>     | 0                       | 0                                      | 0                                      | 0                                                  | 0            | 1                     | 0    |
| <i>ZPBP2</i>   | 1                       | 0                                      | 0                                      | 1                                                  | 1            | 1                     | 0    |
| <i>ZPR1</i>    | 0                       | 0                                      | 0                                      | 0                                                  | 1            | 1                     | 0    |
| <i>ZSCAN1</i>  | 1                       | 0                                      | 0                                      | 0                                                  | 0            | 0                     | 0    |
| <i>ZSCAN2</i>  | 1                       | 0                                      | 0                                      | 0                                                  | 0            | 0                     | 0    |
| <i>ZSCAN20</i> | 1                       | 0                                      | 0                                      | 0                                                  | 0            | 0                     | 0    |
| <i>ZZEF1</i>   | 1                       | 0                                      | 0                                      | 0                                                  | 0            | 0                     | 0    |

**Online Table VI.** AF pathogenesis genes and their functions.

| Gene          | Functions                                                                                   |
|---------------|---------------------------------------------------------------------------------------------|
| <i>KCNQ1</i>  | Potassium channel mutations                                                                 |
| <i>KCNE1</i>  | Potassium channel mutations                                                                 |
| <i>KCNE2</i>  | Potassium channel mutations                                                                 |
| <i>KCNE3</i>  | Potassium channel mutations                                                                 |
| <i>KCNE4</i>  | Potassium channel mutations                                                                 |
| <i>KCNE5</i>  | Potassium channel mutations                                                                 |
| <i>KCNH2</i>  | Potassium channel mutations                                                                 |
| <i>KCND3</i>  | Potassium channel mutations                                                                 |
| <i>KCNJ2</i>  | Potassium channel mutations                                                                 |
| <i>KCNJ5</i>  | Potassium channel mutations                                                                 |
| <i>KNCJ8</i>  | Potassium channel mutations                                                                 |
| <i>ABCC9</i>  | Potassium channel mutations                                                                 |
| <i>KCNA5</i>  | Potassium channel mutations                                                                 |
| <i>HCN4</i>   | Potassium channel mutations                                                                 |
| <i>KCNN3</i>  | Potassium channel mutations                                                                 |
| <i>SCN5A</i>  | Sodium channel mutations                                                                    |
| <i>SCN1B</i>  | Sodium channel mutations                                                                    |
| <i>SCN2B</i>  | Sodium channel mutations                                                                    |
| <i>SCN3B</i>  | Sodium channel mutations                                                                    |
| <i>SCN4B</i>  | Sodium channel mutations                                                                    |
| <i>SCN1Bb</i> | Sodium channel mutations                                                                    |
| <i>SCN10A</i> | Sodium channel mutations                                                                    |
| <i>NUP155</i> | Nuclear pore complex/reduction in nuclear membrane permeability                             |
| <i>LMNA</i>   | Nuclear envelope structure                                                                  |
| <i>GJA1</i>   | Gap-junction protein/impaired intracellular transport and intercellular electrical coupling |
| <i>GJA5</i>   | Gap-junction protein/impaired intracellular transport and intercellular electrical coupling |
| <i>NPPA</i>   | Blood pressure regulation/elevated levels of mutant ANP                                     |
| <i>GATA4</i>  | Cardiogenesis                                                                               |
| <i>GATA5</i>  | Cardiogenesis                                                                               |
| <i>GATA6</i>  | Cardiogenesis                                                                               |
| <i>NKX2-5</i> | Cardiogenesis                                                                               |
| <i>NKX2-6</i> | Cardiogenesis                                                                               |
| <i>PITX2</i>  | Cardiogenesis                                                                               |
| <i>GREM2</i>  | Bone morphogenetic protein antagonist                                                       |
| <i>JPH2</i>   | Calcium homeostasis                                                                         |
| <i>RYR2</i>   | Calcium homeostasis                                                                         |
| <i>AGT</i>    | Renin-angiotensin system                                                                    |
| <i>ACE</i>    | Renin-angiotensin system                                                                    |
| <i>GNB3</i>   | Signal integration                                                                          |
| <i>IL6</i>    | Cytokine                                                                                    |
| <i>IL10</i>   | Cytokine                                                                                    |
| <i>MMP2</i>   | Zinc-dependent enzyme                                                                       |
| <i>SLN</i>    | Sarcoplasmic reticulum calcium-ATPase                                                       |
| <i>eNOS</i>   | Regulates L-type calcium channel                                                            |
| <i>CETP</i>   | Transfer between lipoproteins                                                               |

| Gene            | Functions                                                                                                                               |
|-----------------|-----------------------------------------------------------------------------------------------------------------------------------------|
| <i>SYNE2</i>    | Cytoskeleton LINC complex                                                                                                               |
| <i>ZFH3</i>     | Transcription factor                                                                                                                    |
| <i>PRRX1</i>    | Establishment of diverse mesodermal muscle types                                                                                        |
| <i>WNT8A</i>    | Development of early embryos as well as germ cell tumors                                                                                |
| <i>CAV1</i>     | Main component of the caveolae plasma membranes                                                                                         |
| <i>C9orf3</i>   | Zinc-dependent metallopeptidase                                                                                                         |
| <i>SYNPO2L</i>  | Modulating actin-based shape                                                                                                            |
| <i>SYNE2</i>    | Maintenance of the structural integrity of the nucleus                                                                                  |
| <i>CAND2</i>    | Probable assembly factor of SCF (SKP1-CUL1-F-box protein) E3 ubiquitin ligase complexes                                                 |
| <i>NEURL</i>    | Hippocampal-dependent synaptic plasticity, learning and memory                                                                          |
| <i>TBX5</i>     | Transcription factors involved in the regulation of developmental processes, e.g., in heart development, specification of limb identity |
| <i>CUX2</i>     | DNA-binding motifs                                                                                                                      |
| <i>METTL11B</i> | Methyltransferase activity and N-terminal protein N-methyltransferase activity                                                          |
| <i>KIFAP3</i>   | Interaction of chromosomes with an ATPase motor protein.                                                                                |
| <i>ANXA4</i>    | Calcium-dependent phospholipid binding proteins                                                                                         |
| <i>GMCL1</i>    | Nuclear envelope protein that appears to be involved in spermatogenesis                                                                 |
| <i>CEP68</i>    | Protein kinase binding and protein domain specific binding                                                                              |
| <i>TTN</i>      | Abundant protein of striated muscle                                                                                                     |
| <i>KCNN2</i>    | Voltage-independent calcium-activated channel with three other calmodulin-binding subunits                                              |
| <i>KLHL3</i>    | Actin binding and structural molecule activity                                                                                          |
| <i>FAM13B</i>   | GTPase activator activity                                                                                                               |
| <i>SLC35F1</i>  | Putative solute transporter                                                                                                             |
| <i>PLN</i>      | cAMP-dependent protein kinase in cardiac muscle                                                                                         |
| <i>ASAHI</i>    | Acid ceramidase family of proteins                                                                                                      |
| <i>PCMI</i>     | Electron dense granules scattered around centrosomes                                                                                    |
| <i>SH3PXD2A</i> | Adhesion pathways                                                                                                                       |
| <i>SOX5</i>     | Transcription factors involved in the regulation of embryonic development and in the determination of the cell fate                     |
| <i>IL6R</i>     | Cytokine receptor                                                                                                                       |
| <i>CAV3</i>     | Component of the caveolae plasma membranes                                                                                              |
| <i>ANK2</i>     | Targeting and stability of Na/Ca exchanger 1 in cardiomyocytes                                                                          |
| <i>MYOZ1</i>    | Tether calcineurin to the sarcomere of cardiac and skeletal muscle                                                                      |
| <i>NEURL1</i>   | Hippocampal-dependent synaptic plasticity, learning and memory                                                                          |



**Online Table VII.** Heritability estimation by the UKBB Europeans GWAS summary statistics.

| Regions                                            | Heritability, % (95% CI) |
|----------------------------------------------------|--------------------------|
| Genome-wide significant genes by GWAS alone        | 1.7 (1.6-1.9)            |
| Top 1,931 genes identified by GWAS alone           | 5.5 (5.2-5.8)            |
| The 1,931 genes identified by multi-omics approach | 8.0 (7.6-8.4)            |
| All genes across the whole genome                  | 18.9 (18.2-19.5)         |

## Reference

1. Greene CS, Krishnan A, Wong AK, Ricciotti E, Zelaya RA, Himmelstein DS, Zhang R, Hartmann BM, Zaslavsky E, Sealfon SC, Chasman DI, Fitzgerald GA, Dolinski K, Grosser T, Troyanskaya OG. Understanding multicellular function and disease with human tissue-specific networks. *Nat Genet.* 2015;47:569–576.
2. Wells A, Kopp N, Xu X, O'Brien DR, Yang W, Nehorai A, Adair-Kirk TL, Kopan R, Dougherty JD. The anatomical distribution of genetic associations. *Nucleic Acids Res.* 2015;43:10804–10820.
3. Shi H, Kichaev G, Pasaniuc B. Contrasting the Genetic Architecture of 30 Complex Traits from Summary Association Data. *Am J Hum Genet.* 2016;99:139–153.
4. Roselli C, Chaffin MD, Weng LC, et al. Multi-ethnic genome-wide association study for atrial fibrillation. *Nat Genet.* 2018;1–9.
5. Neale BM. UK BIOBANK GWAS [Internet]. 2018; Available from: <http://www.nealelab.is/uk-biobank/>
